# Supplementary material for: Salmon Gill Poxvirus, the Deepest Representative of the Chordopoxvirinae
Source: PubMed Central journal article supplement — J Virol. 2015 Aug 19;89(18):9348–67. doi: 10.1128/JVI.01174-15 (PMC4542343; doi:10.1128/jvi.01174-15), 2015-08-19
Supplement: JVI.01174-15_zjv999090750so1.pdf [file JVI.01174-15_zjv999090750so1.pdf]

#####

####

##### concatenated and filtered alignment used for Figure 3 tree

#####

#####

####

>SGPV

MNSVLISAKQLENEYESTDMFGCPIITGTSYMPIHVESNGVEYMVYSFNINDKEINAFNKFILSFEVSEL  
HSNHPIAYVPYFGFKLIKKVAIYDENNKVIEDGATLFSRALSKKDNISTSGYSKELNNFNINYTENTYFL  
PSTQINVPLNIFYPNQDTFSTIKPNNSFLRIEVTMELTNMVMVNPAYEKPLVNTLSIKKPVLGIVVYSV  
QNRSTNQYIINNYESVGNVEDDEHYVHGIDNVSHINFDVGNLSGKRFRMVWAGHDQSESNWTNMYLKKLL  
TEIIILPNGVNDGNSPKAKY-

QIMKNKIELGIKTIDLVIERPKNYSAWFHTNPLVFNRENKTQSTYNIVEKINVHCSWNILQNNFVFEID  
HQITIGDISVPIEIWNVNTKSDEGDNRSVLCKNSDVIINDPFFRGVDFLNKQRPIEAIATVKHGNETLYQS  
HLNACYYNPFMTKGYGNI----

SFCHHTTAVCPNYLPSDHIRGRCQIGIKAVWANQDKSTPHYHISKLLIIQYGVVSKVSSVNKRNITSILN  
MNYQNEIYIKPLKTSKIPLDNKFEHTKIFSSPD-EVYKWANGSNETYEHIVSDT--

AVKLFWDIDIDLTKSDQETLESNPYMKILASLAYMKNGLKEYNEAVLMTNAAVVTKSNNCDKISYHVI  
YPNFLVAPNDWCMLTKSLEGLVNSQINNLLKAIDFVVWKEFPTLRCAYSIKSCEDTSVHVII--

GT FEDSLISWIPETTKAQYWLITHEEADSLDPSNSLYNEVNRILTEVFTQLEHYDYIEG-  
QTYQLDVDYCNPCPICFVSLHKNHFCKRQKGLIISKHGNPKCKVHTLLKEDLYLTI AVDIYSRNDIKK

YQEDHFIIWNGVNWVSDKATYSITSYILRISSSIEDSIKELQDYRKRKMVENNLIDLINPIRVDSIPYV  
LYFQNGCYNIKDEFYEGPSAKEYIGSVNTGYMYKSAWIDEDQNAMKDIDIIDQIQPTENKEERELEYEII

LGSCLYGSHKEYMTFFHGDMSGKSTSKKIVNAAIGNFMLETNSNLLTEVIDKRPNPFLAQINHKRALFA  
SELTADSKFKIKGVNVKLLTDHKIISRLCYSNAIEQQNFATFIVDTNHEPFFDIVDGAIVRRCLMINFKS

AFIEKSR-  
ILVGVKNIFFIRMEISSRLETQAYRQACFLILKRFFRKHFLTLPFKTTPEFKDFTLIRKIPTLIVQSST

ETIEILPKYSAKYDTGDTVMEEFYSYIKHFSIKLFGNEIQNMITHSHTTSGHIWVKYIVKHLITYMN  
SVLKILENNHSRLTILPHQMATVDFALKTIIDNKMSAMIFHDMGSGKTFVALIFALLISTEKNVVIILP

NNNILEIWQSKIYQVQSLIGPCDMDKIKMYSISTFILLKSTNDEIDTNKIMDCQDSVFIVDEAHIIFGN  
ATGKFLITIKQKTNVLFMLLTGSPISNTPKALVHIIRLMTGSDISPPKLIQKTKIIHISLNETGKELLE

SLLKGQISYYKNGESIPTPKYIGQPVLNIPMIQCPMENIQEVDYDKTREMSSNEMFETMVVNVSMCALG  
QINFINNLAFFFF--

TSLLPNLKSNDGLLTGQDLVTLDISSKFKYFMKYITEGEKHLIYFSNATYGTLIIRSIMLANGINEYKGA  
NAKDPICFCKHKTFTILTSRVNESITPTLEVFNTRNKHGHFISLLFASYALGQSYTLKEVKNLWFLTIP

DTYSQYQTIIGRAIRKFSYENPNEEVKIRILSCVPKYYKHK--  
QLKPDMDDEIDKLPFDIKKQYYLESKSNESKIYSIFQGISKYKDPVHKNLWRMTMVVELLRIYFKSHPRV

KRTDSKFMFTMPGPDETLNKIITELLDAHVQILNDIFGSCLLYWGNDEIITVPIQLTLPKHCISIPLTK  
EENIVQDKVCITFLIRDGWGKPSYMAGKSRTGEIIWFKTFLPCCYLMYTSDADELEGTYRFIGQFTILDN

TYKGINCAFKKTKELSLCTKPNLHCTEKSYSYGLQWFFVFNKINPAGSYSFNPIREESPNVWKS DLM  
PF-EPIPYFCPPLMILSFDLECYTVGQF-SPQTQPITHCA-

ITLDKTKSKFCLVDTKSIPDSKIKRSDSWCNDQEFYSVYKYFYMVEKQLLLVIKGFLESQIDYVLTYNH  
CMDIPYVNRLEVYGPLITKIPSTDTETPL-

VFKKSKNLLSTERCDIYSANGTLFFDLHNFVKKEEGLNSYSLEALSCKNFNGYGTLLKGTDWTWFRSTKN  
KSLYFTKLLSAGFINLDN--YLPICNKVIT---

ETVLSFQTPYLPETEYFEGKDDVEIDKIYINYNMKIAEEIAPYCQHDSNLCLFLWEKYNIKYKINAAS  
FLYKLSQDKVLFYATTTSGPILEYMKSKKLYLERCVVKKYQGATVFEPDEKIISAPVLVFDYNSLYP

NSCIFGNLSPETLVCHVYITDSVKLIWCMKLLKEIYTWPDIYVNCVSVTGKISEILVYDRREIGIIPSL  
LKEFISLRKDYKKMKTCPD-

DYFLYDNLQLVTKLSANSIYGLLTNEFVLKSIHSAKACTSIGRDMQLYLDVFKSSEFKEDGLLTNIQI

WKNEPLKRFYPSQTKLQCIKRVYGDTSIFTKLLFDLTLTASKIGKFFEDTINKEILFDQFVVEFEYILIN  
VIMFSKKKYYGKEYNSDYENDPEISGKG--  
YKKRDMCDYYLDLSKQVDIKIKTLIKQNPVNVLRRHVQVFLLAEFKLLTGKETKVEFYFTRRYGADTEK  
GENPNSLIKEWKSNPNTVMIGERYYYTYVCDRENWQTNVKNKRMYEYILENSQKIPSNRIFYEIIILSRV  
CDRVFKSFDDQAFIGFSSKLFGTKSKLYNMRCGKLAKNYIDLISKNTFEKGILTWAENPIILTKVRPDI  
SIVIPLGYWSNP--  
ILKNIDYNMMLIPDLKEIELRDQVTPYSIITIDKKEESRPCFLRLIMPCGFGKTMMAVKLIQELKIKTAV  
ILWCTSLMQWMESLKFGGITDVVGSQGIPTLELINLKYPDIIIIITAAHLVRRDCRKLIQSKYDMIFIDE  
SHKYNLNNVNLKFLHFYPCPFTFFLTATPRINSFYCNDILSFCKDNKILKRYVLSVSM-----  
SEQTKKIYEGYDVKDRYKMMRGMVLEKDYRLEYIETVDFADDMFDGIVLTKSRNVMKLFNSLLEEF-  
PEHVYVADAEEKETQVLLQYLKKKKCFILVSTFYAGTGLDLPNLDAVFFSSPMISRTDVIQSAGRVSRFN  
KKPIRLAVVFNSSILNWINIM-  
RKGSKLVTESSLDWVEDIVMTTSEFDRNLLKAPFRAAFLGSSGTGKTTYLFSLFDTDINHFNYYCVS  
TELNFYSSHIWPKFIALSLSGKDMGVSVLQSIKRYIESEKNTKILIIFDDCDSILTKNEGKFTLTRC  
RHVNISIIIVLIQDLTQIPPMWRNQLSHLFFFQVSEKSRKIITGQSVCSQLRMIATIDPGHSGKSPLVLV  
KDNSKAVFKDRANHDTVKGKDFLFYSRSQKQKFFEWYKTSIIHPQLVILTGPDKVIEKILYLSHFKSI  
NKTSNVFYQILKNKVIPEPEHVNNHVFLTLNNAQIRYYLMNLLKIDTPIIVYNNRYNIDYSYVDRQVFN  
YINIT-KTGLQKNDLLYKLYPCYDNLILWVVRSSDINDNDLGQ-TGISWNM-  
EHEHSLFECVKKVIPDFTITSFVNNQFRTEITNKTSKIQKYAESLPTPISNFFVTDKENIITGNRLDCQK  
ELTIQVFE-DGILGIVIVESMIYIKNKSLFQEIY--  
IYDYRRVTSEVVKVSLGSPINSSLPLGTDVNFLEKSTNNIILTPDKKTNIIIAKNLITIKMKNFYKS  
LEKYFTMMIVSYNHIHSPNFKSNPFLGLKPYWSRICQNTIGKNRKLISSEISEQLIEQGTGFFKNKSS  
DFYVDEYTNVYKCPDNDAIRYLGLKIFASINGKCIPCCFIQDQSSTPIYKCIDKVDTKKAYDLYILQY  
GKYILPDKIGFLKSRMDTLMNTKSKLVEEETRRIKEANDYSVIVTGKDNHMHMINKDEEIQKYITDNKVV  
LMYKSKLIYPENYHSLPSYKVLIKSLLHNIRIKKSNDSIEVESKRKIIADNNPFISEPIIKSHGMELKF  
GKFYVDGVLFSHSISSDYINIEEKNTNVKTAKKFFRHHFSCVETLQEVFMTTFLTNIFQFKIPNSIEHSE  
TKNLEKYFSFILDYKCECNINSVLNCDGKLCISCEKTFVDGKETTNSCYVGNKFIHFKNVIKRLLTR  
SDNSDLVEELKVELKEMDIDIKDVSNSFISKRLKNKKIYTYKKVFEILSDLNNHHIDMSEEMFEQITSIF  
HSLVLFVQTIIRSGKSINYNFFLNKIFMSVNAISYLHPQMVKPNPYRNNENQLWDMFIKYLKKKEDRTIPE  
RSEITFNFYF-  
ECSLNVSCSEVEWSMFPNQITIFQTDVTEVFKSLWKPEHLLISVWRLFWSGVKGYSVKKTACVSLSD  
---TSVPMML--  
STRHWVDKDGIIFFPEVASALYFKEVNWEDVGMHWFVGVRAASDLGILTSPSKTSLVKILGSTGIKVP  
KGLTEPIQKLIFESWTKKFMVLGGTGVGKTSQIPKILFWFNFLFGPRDNICWSPALQSRPLCLALPRV  
ELVKQVSSTLLKGLGLSIFEGSPIIPKFGGVQDDPVNTTKCNYGIEICTHRIAIAKNIRRYESMIVDEIHE  
HDQYADILIAVLKKYKN-SLQTLMSATIDDDRERLNEFL-  
NPQFVHIEGKSLHKVEEIHRTTDESKKYFKNEEKIMETIKFPAGHCGILFARVAQCNMKELLEPM  
FPIEFIVVHGRVPDVLNLINKISGPHKQILISTPYLESSITIPNATVVYDTGRYWRLLSGGSESPV  
GMADQRKGRVGRVIPGMYVKLYN-KYEHWKKIDGEFLYPYILLTYPYKLEV-  
DDLIIKLDQGRWELTKNYLES-  
FPIDRITNIYDKFQCNMIEFIKIYRDLNEKFGNWDTKPDISPKFKLLKLNLRVSVISCTNPLENRI  
MRLKFGPEKNINETISQTELKQTLHKIHNSIFV--  
MDKKIGYLFKPDPKGVFYRPLDFQYKSYRNFLFRINEILEIDRELHSDKTGDVKMFLKIYNIKTFPT  
NTMTLHALKNKGYTCSVKFNIMLYSKTRTDSGIKEAIIINYTGFNDNMINVPLMVGYGLGDVFGSGAIL  
PNEIGGTFLNYRSIEKIGINLLEKTTAWPKFKVKAGQYAFSFSISSPPHITPPVYRYFKIVLDFNNPEF  
VISSQKMFITVNILILIKYLLKCNMEFIRDELLNGLDPVNDYFLHNVVNKIQNIVTTVRSVVKEFINFLV  
EKEYNDSRSKLTLEKFNMFNFLPHINDDVSKGLYLLLVKMFLLFAIKPHEYPDRDSSHATRRIFTY  
GSYFEQVTIDELENFVTKIKN-----  
AGSTVNHMSMTTMGFNSAFNNLLSGRFRKTI SPHRTHVHYSWMQNVVIPRSIGFYDPQVKIAKIFNCRQF  
HPSQYGGFCPTDIPDHGESVGLVIQLALHSYITSIKLQEQYKQIRNEIIREIKNITSAQMMRFKTVIMIE

NKIIICSVAPDLAIKIVEVIRNIKRGMFVNDFGVTYIQGYIRQIKFNIAGRVVPRLLVIDNGELVMEKY  
RDEIEAF--  
DGTWSELLETFGVIEIIDIEQFIYSNIIENQKVYEGMSLEQRKLYQYCDFPEEFRNGYSASCLLGINHN  
AGPRAIFGCAQVKQISISCLTSDILNKIDNGLHMIYPEKPLVSMGIITSLISNTFGQHINVALTSCGMN  
QEDAIVCROGFLDNHGMNILSTKKTQLDIPNENFRASQP--  
DYTYGKLNHLGVPVINSILEAGDAMCKNV SIRVIDNSKEAIKSDISEGYTDIYPGRTVRVQIENS DKVKV  
RLLTVSERQPIMGDKFTSRTSQKGTIAKILPDHEMPYMEDGTPDFIINSTSIYSRKT LAM LLEMILTNV  
FTHKPI NEQGVRYVNFPSFNVALESYDFGSTCIKTAHPDWTPEQVND E L FCEQTL YNPDTHEPYKSK  
FMVGM LYYLRHRMILDKAAIRSRGKKT LTKQPN EGRKRGGGIRFGEMERDCLIGHGAAFTLREILHDS  
EEDRQKAKMCNECGDFLMLSKTESYCSRCDIAKLHPYTEADLSHVVKVFKTQLGAQGIKMLLKESETPSV  
YYTKP--  
MRPITSIEFGLYTNDEIERSEISIKNSKSANDHETVKDKRLGTVDN LCKTCRCISTLCLGHWGKVG IKN  
VYI-  
RPSHV NQIIQISNYLCLHCGVFKLKSAYTSTKIALKHIKELAKSILDKSGICWNESCQQKYVKISFNKKK  
ICFTWKSKEYPLQKLFEMFKSIPALYPMIGVKVSPENLFYEKNIP PMLIRPPNSFWLDDVKKETHEL  
TILMTTLINQIKSNSDSMIIQKALIEYDNSNILAVKQNNNSLV SILVGKNM L RWHILSGRKDQTCRTVV  
GPDSQLLLWEIGV PDMVLSKLSKIFVNPFSIEKIVNLFAGQVKIYFNKQTNRLMTLKKDKKLKGQVTFK  
PGDW EIDLQEGDHMIFGRQPSLHRHNVISSCIKRVEGCGLKIPQVICNSQNA DFDGDEIWGCLEQHPKA  
TIEQSILMFPVTIILHDLLGIPLYGNIQDEIISAHLLGTTELTLTEVNYL FKQCPHQLALPGQKYFTGKN  
VLSIVFNQNL TLP GILKDGQIIIDNIGSDLIVGQKTSLSKLI IETSSRLEGCKFINDIGRLLRQYLRFRQ  
YGVIFTDLPDYAYVRTLN NNDKLFKIKSNFARYIRDCEGKIIRLDEQ TENKYIDTVLMSLVKSNICSI  
TKFIETQLEINPRNSLYVMSKAGYKMNPT EMMYIFGTFGQKIGGKKMSTGVNSRILPYHLPGLDPECR  
GFVLNPLL VGLTGIEYYFTMATARSQIVDIVCETSRTGSLARKILK KMEDVVVNELGYVICNKNILKFAC  
NDIKMSKQD TTKIPIITPKPSQKWYSEIKHIWNTLAPYL TTDNKRNKITQCSFMLNLD MFLQTKSRVPVE  
SNTL FKQVNEWVDMITQKYFFNLSDTTMIRY TMLTYLDPSRYPIDSVVLNDL FENIENRFIYSLSSGYPV  
GVIFAQTLSEKFTQ QALS NFHTTAKSGGVATLGFDKFLKLVSLTKTKAEVITFTSKT PLEILQNNFQFVC  
LDQLCPVIKTRVENTKMY-  
IEMFDRKHLKSENIQIPQLEIMIETFFNKIQITGQWSYWTEILDKRKFIIRITELEEPVSVNQYILP MML  
PGGIYK GKICDVKFPIEYSEHDEHKQVDYKLIMILDSTAMLT KFDLSGIDVPGI WTSYFGFGIESVRNKL  
INEMLETYGN GFDYLYQCCNLLADVMCHYYY PETANNFKMTKISIMKKMASGDYK SVAQA AVSGAVDVVQ  
DNSTCHFLCQPIKVG TGFDDYYTDINDF--  
VAKSTIEDIKETLLIGFMNTGSEIVA EYGKMYEKINMDLEITELEFTQFDPSLLSLSKMFNIKPLTDSY  
LEYILDEGN NIKIRIRIDFAVVGLELNNQLLDYVEHGCWESKETKDIWLSPEGRITSATEKQGTYINK  
VIQSGKINMIFVNARVKFSD FVDFKLKRKLGNCRQGN S NLYKSVNNAMYPPNPSLEIEHTQFKKPWKDV  
KLEFTKVISWIIGHPIEEILTTPFKI IPTSVITPAYLMSIDPTQHKLTPKINGV VFKIDKKHVLVQQMLV  
ISIWRYKHLLTVTEDIGSGEFIDDHKCIYPYMI-----  
LGHDVSTKWEVQDCANLYDHVLIKKQWTGPFNDITDMLTAIYEMTVSKTDGLILSYRHG---  
KDYKIKATSDIDIVGKVRFTYSDPRQMATDGMILTVDYMSNATNELVKIRIKLSPEFDYLNDFCVKTTR  
VDPQVKLSHAVVPIGFICEYDVRTKEIMIRLTKSSTHLWTKYLGNNWTTIQTHLLSKEARDHTVLQDVKI  
NGTKSMEDDGLRLNP KTTYFKENRIRSPLGYISNFVKSLLISLYASKMFYSNSKKARVCSIDFGNGADLT  
KYFYAGIQLIATDPDSAAIDTAH DRYMKNKNEKS NYRFNYLKTSIRNENFVSVIRTVTDQLNFDVIDW  
QFAAHFSWNHKKHIQNI MHSLCEITKPGGRVLITTMNGKGL ESILDKDSDVTFKIPEPTGYTTITKTSPTT  
FSVLTPLTTTTAMTEYIIDPDQM IKTFYDYGFVLLDQGRFDEVFNINVPFFAGS LLETRPSTASFFAQQR  
GVVHIKNTQLDQLLKYIYMVFQRG-----  
METDKLILPNHHKYIHS DILYNND SKTCLTCGNDIGVYKLETLFEGIGAF CSPACSDIMAGCVSHISLKS  
PSRMKLPPLCMYKNSTRLVETVT-KEME KCYG-TQQRVGNMVRVLIKKLN  
>Canvi  
MNNSILSVNSAD-FMKRTNIFSF DVQQPTAYMPQYISVNG-  
YYDTISFDIRDQHISAVNYFVLSIELPEVSGEGEFAYVPYVGYKCIQRVIITCGDITI WEDGEELFDKCV  
DDDI AI-

MSGYSSELNDVSI GYTPNDTIKEHTTVYVYIKSPFDIDKTISS LKLVNSKITVTVTFRSINDVIVYDSKF  
QAEKFIQEFVYSPELHLIAYAVNDIKPKSAYIEMDRRLVSSTPAPIPVISDVYACSEVSVYVKPYYGNKF  
ISYPGFKQNESDYIQSLVNRLLDDL VVVTDTPVKDFPDSAMFLKVPVKGITLQDVDIVVKIDNVPEDKDV  
YYHSNLLVFSTRKNSFVYNISSKFSIIGTYSLITDSINFSNVVHSISITDASIPVSFWSSQKNVYPGDNR  
SSHKS KDLVVNDPFRKGIDMVNKTEVISRLELKF GNDPIYTETLPITKIYNKLLTGTRVNM RKLI FNMN  
PNI FRPTTLNANTKRGKDKLTVRVS YVDIDPNNPIHYVAKQLVVIC TDLYRIDYDGKINVT KITEINNHI  
VFVLKKIGVSTKRNNNDIRYVESFTCEELERYIAKNPGCTLFEALKNEEYSNIRVFFD VDMEGTLDDNS-

SAINDFMRVITKFIAYAFSCEKDKQMINMKENFSITESTNTEKTSFHLIFFNCYTTVDTLINMGKLLP  
LIKQSNRLIKAIDTAVYRHNP SLRVVGT RKTDPNVYVHKTDNRVPFKNYLFTYVDFKDD-  
CYYFVESYN SPDLWRDEYIPFDAMKKVCKVINNINLKEITENL TEIPLNINYATPCNLCKKVSHKHPHK  
LLIDNDIRIIKCGNPNCKIKVILEGNKLF SISQIIDLNVINISDRGEYLIWLKDVWRMCEDES NITKL  
ILYMKDYISSDCTLLLCPNRKVIEHNLK DMLIDPIETDIYPEKLQFTNGVYDIDS VFYQGNDAKNFVCT  
VSTGKYED---

KEDNGVIEELSILDDIQPTKENSENRELYEQILSSCLMGTTKQCIFFFYGETATGKSTTKLLKSVMHNM  
FLETGQVILTEQMDKGNPFIANMHLKRAVFCSELSCNTSKKIRSDNIKKLETPCIVGRPCYSNKINNRN  
HATIIIDTNYKPVFDKVDNAIMRRIALVNFKTHFTSRKK-  
VYNTKYDFIKPLNEGLDSKIQSNYFRYAF LKILLGWYQKYHVPLTILPTPDIPDFKFR LKIDALIIPSST  
THIKIKELSKLGYIIDGLPLYVSFQQLQVYFNVKLYGHDI ESFIKKNKYNFTDEYMSFIFIEDLNNIMN  
LILELFNGHIDNIPNILPHQLATLDYLLKTI LDQNESVLLFHIMGSGKTIIALLFALIVSKFKKVYILVP  
NINILNIFTYNLDLATNLINTEYVIENIHIYSTINFYSLNNDNVINYNALTRYNDSIFIIDEAHNIFGN  
NTGELMTI IKNKVKVPFLLLSGSPITNTPITLSNIISIMSDEGINFNDII IQGKKVFQIILNEKGVSVLK  
KILKNKISYYELCDELPSIIFHGKEFLDTKV VYCRMSKLQEIDYINVRKLCNNEMFEKNMTNVS LAVLG  
PLNLANNLDLLAEQDKELYPNLKINDGVLYGDELTKLNIS SKFRYFIDTVNLNGKHFYFSNSTYGG LVI  
KYIMLNNGYSEYSGSQGTNPKTINGNLKTF AIVTSKMKASLEDLLEVYN SPNDNGEKIMFLFSSNIMSES  
YTLKEVRHIWFMTIPDTFSQYNQILGRSIRKFSYKDVSKPVNVYLLATVYSDFNDKIKSLDDYNIDEINT  
LPFDIKKLLYLKFKTKETKRIYSILKDISIYRSCPHYILDVVLGEMIRQYFYHHSRVS FDDQKLFKMIN  
IFKCEKTMQYIKKITEDHFFITNKT FQKSLLYRHKNDIIVVPFSLVFKEYSWMINFRKELNVVMDIRC VN  
WFENKGDIKYIYLKAITKDN GVI FIRFNYYYYYVYDSE--

EELKFKPRILGEFDI IKIDELDDD IENERKYS DLVVVDVKR-  
SREKYLGEYLDITW FYILNNIVPDG CYRINDLKQIYTDCYHCDNVKMIIEEIPIFEVKFTY LFFDIECQF  
DKKFP SVFVNPISHISCLIIDKKDEKFTLINTDLLPDE TISRKQFPRD-----

KITFCSEVIMLRIMKKILEERFDVVT FNGNNFDIRYISNRLTILEKSIFSLPDNTETTDLAIIGRFLGN  
FTNKTYHINNNNGVMFFDLYTFIQKTERLDSYKLDNISKNI FNCNAIIDISDDITMAGNTKDKISIFSEV  
LQTGN YITIGNSDIKIVYKDIRSDSFTIKVVS NKPYECGSIQFISFGKDDVDLRSMYANYNLDIALDMEK  
YCIHDA CLCKYIWDYYKIPSKIDAASSTYMLPQKSALEYRASTLIKGPLL KLLLEEKVVYIREASKRPI  
GGKVF LPSQKTFENVMIFDYN SLYPNVCIYANLSPEKLV CILLNSNKLES DINKMLKRKYPYDPYVCV  
MCD SRIEGYSEIIVYDRRNKGIIPKLELFISKRKKYKSLLEATTIETTLYDSLQYIYKIIANSVYGLM  
GFHSSSLYSYSSAKTCTTIGRNMITYLDSVINGAVWENDKLLADPNIFSDKSKEIEVP-

PMNETFFRNVYGD TDSIFTEISNRDVETIKIAKILENIINTKILHANFKIEFEAVYTQLILQSKKKYTTI  
KYLADY PGDPIRVNKG TSETRRDVALFHKQMIQKYKDLLMKMLMEGKNQQDITRDILQHLEVMVEF-  
SNNKEFTYLLSRKHNDYKSATHSNFLVKQYNL INTEKIEIGERYFYLYVCDITPWQKKLCNIQSYETIA  
DSKYFLPSDRIFEVYFKRIASEV VNLTDKTQCLFFNRLFGTRPVFSSMSITVIDDKLYSSLRKLIGYS  
PLYLFT EEGKFVEVVKNSEFKFLIPP GYFSNPNVPLNGFSHGTMKDKHTLPELYPQKRVIDEIQFSKKK  
EKRP LYTTLHLACGFGKTITASYLIGIHKNAVISVPNKLILQWEAAIKALKVSYYISHEGVS KLLKVLS  
SESFSILVVVDKHTNEEFCKYVYENYDVFILDEAHVYNLMNESTMTSFLCYPPRICYFLTATPRQNAI  
YCNSIINFIKFSPLQKVLHIIKEFYNEYTSPTIKNYISQLQPSNKYHLYTEKILAEDHRNKTITDKIEFR  
SNNGNRILVITKLRNHMFIYNSLHPVL-

GNCVYIGDAQKKDTTEMIKELRTL DKFILVSTLYAGTGLDIPNLDSL FICNTVMNSMQTEQVMGRICRET  
SSPTRSIFL FITSIKDIKSLVGVFTQRFAQQATK-

LGFREITIVREVKFNRTSLLSYFRMVILGGSGSGKTTYLLSLFKTFVNKYKHIFLFTPLINPSYNYVWP  
DHVYKIADNELEYALMMRDDL TNLEKSSNHDFLIILDDLGAQLKSKILPWL VNTGRHIRMSIVMICQT  
YRHVPTNCRSSITHLCCCNVSDADVENITRSM SLLTTKPIIRALSVMRAKGKVKYI IENTDVRICYDTAD  
KAVINKNDSILLKQFSHMKRQLSIEE-  
YVVPQLVILVDRDQKIVDVLYLTLYDGI DRRSSMSYFIRNHLQLDRVRLNRHIIL TLKISQLKGYLCN  
LLNIDEEIIIYSHKNNLEYSYVDNTTFNPFTMTQRKTLKSEFLYNVYIDACNFLVIWVKASDTNVRE  
LGSYEEVD TNVLKFESKLIEMFNLDLNF TVESKFNNIFRTNLKTGLRNLVLNDD-----  
KKLFIKSDEYFILSGNHFVLNDEINLSIWDD DGLAISDGN TITVNNVKLFTDMIPNNVQMERIKSDIT  
YKVSLATPITSKVLDIETSFIETATNNILL SVDKKISII LAKNHISIKVKNYIPNIEKYFTFMVIFI  
NRLFNTVKQSMDFTKIETIYWSRICQNTKDKNRKPVIVSSLES DMVKISDNFYKSPTKEVFVNNNDIMFT  
CDKTGKYNVGF LAIFYKLQKICIPCCFLKSQSHTDTFMACVHNKETDKSISPYILNYGKVVTDSKISFL  
PPIFNEFFNSDMKIDLES DNKRLRGTKGYHVIR SCLHTLRIRSKNDIIEFVNSENVTLIANDIVYFPMK  
YSSIGKIFILVQEI VHEIVVKEEDKDIYLELKV NKLKDI FPYIKVDIKEENGLKLT TDGFCVDGEPFTE  
PLSTKCSVFM DNISINNPIAKYFNQIFKYVVT DNEMFIKTWVINTMLMGISKDWNSSQVKTLEKYYK--  
RNLKCSNCKHNGLITEYNHEFCIFCQSVFQLSNKVKKS NFHVS NKLIHLRNLRRLLSNQCSSD VITELR  
TVMNKNNIS SKDIDANFVSSFLKANDKINYKLVFEI INHIKEEKLNLDTNKINEVIEIFKHLVFFCQENT  
SSKTINYSFFLDKIFNLTSVTSNLKPQTVKNYTKNNS NQLWENFLEYMKNKKINTVDYGHEYVFDYFTT  
CSLEVTNELFSIYAFPNMYDIFPHSYTYKELEEYHNKDTFSHSVFP IIKHRWNKVFI CLKDDTYMLNIEN  
SIAKIPVSKPINSQVYYIGNDRFITFECYSYVKCIYNHVSDITLDDKRGLLVAGNHL SIFS NKVVKNSIG  
ILNPNPFIISFKLSLTTQVHIFDMLK KRKQIVVTGSTGIGKTSQLPKVIMWYNYLFGGWDDIDIRLDFI  
PKPIVLSLPRVTLVKSNGN NFLQSLGFSQFEGSPVELKYGGHTE---  
KTKKGFQGI VLVSTNKLTSYSLSKYNIVIIDEIHEHDRIADIMIAVLRKNDSIHSVLVMSATLEDDKDRM  
EFLPDVEFYHIEGPVLYSIKEIYVKNRSPDKVYFDNERKNISSTLLCKPDGMCGILFLPSVSEC IYKEY  
LESKNKIDFIVIHGKLNIAEILQDVQNRERPCILVSTPYLESSITIRTATHVYDTGRVYVPRPFGGEQM  
FISKSMMTQRKGRVGRVMKGTYYVYFDMLLKAIKNIDHDFLYEYIYAKQFNLSLPEDLLIVPSNKKMLK  
ASEEYIKSFNIPFDKLF EYVNHVFMVVEYVKIYNKGGKEELDMFERDDILTEETLEDIKNLQLLVKIKT  
TSKRKDYVYTGEILFGPYTKTIIRLSKR FYKNYIYMLSDRSFTLRMDQKLG NKFL EPDPKNV FYRPLHFQ  
YVSYYNFICYRLKEILSVNRTL SFKNDTEKIILKIDNIKITPPPHSPIIASIKGKSYDALVTFTIDLSK  
EVMTKDGLMVTTISR YEGKDAQLIKIPLLIGYGNKPLDNSKFVSPNIIGGVFINKQSIEKVGINIVEKT  
TTWPKFKIVKPNAYTFSFSSISPVDILPTKYRHYKISMDLSQLECSISSAKTFITVNIILIKYLINQDL  
DFIKNNLSYDMPKETIYLIEAIIESTKTILDTEDFNMYEYIDNLEIEFQKQRSITKIEDFRYELMHNFL  
PHMNSSDQLKGFYILGLLRKFYICYT SRYPD RDSMVCHRVLTYGRYFEILANDELENYVTNIKNDITN  
NHKSKGICSVSIHVLTPGFNFHAFSGLLSGKFKKTDGSYRTHPHYSWMQNISIPRSVGYYPDQVKISKMF  
SVRKYHPSQYAFFCPSD VPERGPQVGLISQLSVLTSVSNIRTTEYIDLKEKIMEYVYSYDKNDMSYFETG  
HITIENDLVAAINPELVDFVDVFKFKRNYFGNLEIGISNVKDHMNEIRINIGSGRLIRPFLVYK GEL  
VMDTVSEELDQRLNTITFSDIQREYPHVIEMLDLEQFVFSNVCESVSKFRQLNDEDKKLYDYCDFPNEFR  
DGYVASTLVGINHNSGPRAILGCAQAKQAISCLSSDIRNKIDNGIHLLFPERPIVLSKATETSKIANCFG  
QHVFVALMSYKGMNQEDGIIKKEFIERGGLDIVTAKKHQVEIPVENFNNRERIKSTAYSKLRSNGLVRL  
NAFLEAGDAIARNISSRTLDDADNQISFDISEKYTDMYKSRVERVQVDLTDKVKVRVLTMKERRPIMGDK  
FTSRTSQKGTIAYIAPESEL PYDKNGLTPDIIINSTSIYSRKTISMLVEMILTSAYSVKPYNNNGQNRPI  
CFPSSNETDIEEYVEFARKCYQHAMPNLSKEELENEVYCESVLYDPETDKPYKTKVFMGPLYLRLRHLT  
QDKATVRCRGKTKLIRQANEGRKRGGGIKFGEMERDCIIAHGAANTITEILKDSEEDYQEVYVCENCGD  
IATKKNNHVYCI RCTKLNLT LTKIDTTHVSKVFLTQM NARGIKINLTFEGQNPLFYKPMKPM SVISKVS  
YSLYSQNEINATDININHVKADDEAGTVKDSRLGATDGVLCCTCN RTELECFGHWGKVRIYENIIRPEY  
INEVLRIQNHICLTCGLLSREPYIKDISALS AIRKLDKISSKKKSCWNSRCMQPYQKINFSKKKVLV  
NKTDEVPNALVYEKLT SIHPKFWPILDIHQDPCNLFYKGYFPI PPLLIRPVTSFWDNVHKDTNELTYLL  
GVIVKHCNANA DEPTIEKAIIEYDNIKLISTNSTTNNLSYITSGKTNMLRSFVVARRKDQTARSVLGPDS  
SLDISEVGIPDYMRNTLTERIFINAFTIDKVKDLFKGEV KYYFNKRLHQLTKIKQNRFIKNIHLLPGDW  
VETNIQEYTNIIIFGRQPSLHKYNVISSSVRKTAE DTIKIPPGIANSQNA DFDGDEEWTIVEQNPKSVVEQ  
SILMYPTTILKHDIHGMPVYGSIQDEILAAYNLFKDNLTRDEV LNILGKYGLEFITDYKKVYTGKDVFKF

IINENINYPGILSNGELIVDSIDSNFVAMKHSISGLITDYKSSIEGIRFINKASYVFKRYLKIYGFST  
FRNLPDFEFTKKLRDANEKINIISAYSQYLYDVANGSIIPLSRADMEAVDSILSGLTNFNIEIEKYM  
KEVVAKDPENSLIKMSCAGYKVNPTELMYILGTYGQQRIDGEPIDTRILGRVLPYFLPDSKDPEGKGYIL  
NSLIQGLTGSQYYYAMLIARSQSTDIVCETSRTGTLARKIIKKMEDMVVDGYGQVYVNNLTKYAANYTK  
IQGSVCKSVELIYPDESLEWFLWFLWDLKNGFIYNQGGKISKYILAPFNFKVFIKSEK-  
PMKPKDLYDKIQIVIKDIRENYFFDISNIDFIEYVFLTHLNPSRVKVS EDTLNTIFDKLYEKLNYSLGG  
LPIGIISAQVLSEKFTQALSSFHTTEKSGGIKLGNEFNQLTNLSKNKSEIITLISDDKLQTIKMNFE  
FVYLGELNPEITIKE-  
DKDYRIDIIINRLYIKRNQTELIVEYMLEKFVSYSVLVKNWGMETSIVNEYVIRFSLIVFTEPLGINKN  
KFMMVLPGAANKGKVS KYKIPIKYKYIDHRTKEYRLTVELMGLKELGTFDLINVNVPGVWNTYEIFGIE  
SVKSYLCEALLNTYGEGLDYLYQPCDLLASLICLNYEPESINKFKFGPVSALKRATFGDNKALLNAALYK  
KTEPVNDNSSCHFFSKVPKIGTGYKYFMDIEKFKKISKLTEKKIADIGEVDQFLEPLGSHFEELVDTFF  
EASEVSKHHEVEMQIFKPSIITLSNLNYISTTTTESYIEFSMDKK-  
NTKYRNRIPLSKIHGLDIKNSQLVENLDGFIWEEKTLISEKRV-  
SCTIRHSVEQKTLFVDYKRRNGSIRLELVSVRATLRNIVVDFKIKYFLGSGAQSASSLLYALNPNKKNPN  
LYLEFEISSKNISKQLLLNELNTIGNALFLSKVDKIRLCPIKLVKTYLLKKQEINLNINENLYITSKTDG  
VTVLLQNKSIYCYFSHLGYIKEYTANREIDEKVL YAEMRKNG-----LYFTVILNP-  
MKNRLDEKFNKLNQINDRLVFVKCYEGPFDSTDLVFAIEEMLKSEHEGVIIIFYSCGEESDYKIKKD  
NTIDQCVNVIYRYSEPVVFSNDGPFIEYKRYSDDKDFPKEFKLSLGNV KYLNNIYICIEFTNLPEHTGVE  
KIIVIPKFAIEFSFNDKMIQPRIDKTMRYLYTNYYGNQLSVIIDHLNDQKINIGDVFEEDKLAEVAHKLK  
DSLRLNPEGNYFIANKRSALGVL SNYVKTLLISLYCSKAYLDDHSKRKVLAIDFGNGADLEKYFYGEIA  
MVATDPDEMAIETGKKRYNNLNSRDKSKYKFN YIQETIRSPTYVDSIREVLYFGKFSIVDWQFAIHYSF  
HPIHYSTIMKNLYELTESGCKVLISTMDGDYLDTLKDKKKFIYKSPETENYLSVEKIDNDKILVYNPSS  
MTKPMAYEIVRKDTLVRVFKEYQFSLIDNCSFKTIIDRSINFGVSRLETRDSTKNFLELNRNALECEGT  
DVLELLDHYMIYVFSKNKKVNLSGIIISEPKSVKNIKESINNVVPKYYQVLT DKNLIKDNNNCWFCKQ  
QLSHYFIKTLYGDIGFFCSKICRDSFANMIKGIALREPKVSLPLEVYENPEEVIEIINLREKEGTYGN  
CIL-ETDNIRLTLRCHC

>Molco

MNASIIISLIHAEDGVRRSNVFGFDMHQPTLYMPQYVTVSGVLQPVVAYEVRDQYITAMNNMVLAIELPEV  
KGVGRFAYIPHVGYKIRNVALTSVNGTVWESGEELFDSVRGHAAALELAGHSRELN DITRGDSPNDTIK  
DASTVYVYLRSPFDCDHTFSSKLSDAKVTLAVTFNPISDVLVYDAAFDLDAFLRSFVYATELSFVGYMV  
RNIHAKPSFLEITRRQVGQMNLP TAVVTDVHAATALAVYVKPYGNKFIAYPGFSQSEQSYVCAFVERLL  
EDLIRISDAEPSGFPEAAELVEVPPGLVSIQDQDVLVRIDGVPAGKTVFFHTNLLVFGTRRNSFMYNLSK  
KFSIAGCFSPATGKIIFTSVQHTVSVTASIPVGFWS SPKNVYHGDNRSCSSRAKDFVNDPFLKGVDFL  
NKAEVISRMEVRFVNDVMYSEIAPISR VYNQVLHGAHCGRKLLFNFNPAFFRPTTLTANPSRGKDKLAV  
RVVYSSMDPNPISYVVKQLVVVCTDLHRVTYDPYIRVSKVSEVGNVIFVLKTLAVPADRRREDPRFVE  
AFAPDELDAYIREHPRCTLFETLRDEEYSVVRVFFDVLGAPLPAHELLPAFDGFIRALS RFVAFAVECP  
ASRAALARLRADFSLTRSTNPGKTSFHLVFRNLYTTLDTLVAMKRPLLALARRADNPLLRALDPAVFRRG  
ASLRVVGTRKTPDSPHVHRTPPHTRIQDYLFTFVDFSEKSCYFSL-  
RRRAPEIWDQQLVPFDAMRKVCQVLNEILNLHEFTDNFTTTPLLLDYVTPCALCRKSAHKHPHLLALGNG  
LRIFKSGNPHSCLKVILEGNRLFTIAQRILDANVINLTERGDYIVWLRNCWRFSGEESVITKLVLMRD  
ELAPEFAPLLCPRNRRVIEHNL RDMLVDAVETDVFPEKLPFADGVLDIDGSFHTGADAKDFMCTVSTGYR  
LERDAARDAAPARAELEVLDDIQSPGNAENRALYEKVLASCLCGATKPCIFFFGETATGKSTTKLLQ  
SALHGLFLETGQITLDMDKGPNPFLANMHLKRAVFCSELSCSGAKKIRADNVKRLTEPCLVGRPCYSN  
RINNRNHATIIIDTNYRPFVFDKVDNALMRRVGLVFRFRTHFSRGAP--  
ASRLYDVTVKPLDAALDRKIQSHYFRFAFLELLEWYQRHAAALELEPTPDIPDFCFQRRLDAVLLPSDST  
HRRMPQLAKLGYVLDDALMPGAFQQLAEHFNVRVFGQEI ESFVKNKKYSVSEDYVEYIFVADLEKAMNL  
IVSLFREHVD SIPNILPHQLATLDFLLRSILDENNSVLLFHIMGSGKTIIALLFALIVSKFKKVYILVFN  
INILKIFTYNGIAVNLI NSDYVLENIHIYSTTSFYSLNYNDNVINYNGLAKYNNAIIFIIDEAHNIFGNN  
TGELMTVIKKNKVPFLLLSGSPITNTPITLSNIISIMSDEGINFSDIIIQGKKVFQILLNENGVSVLKR

ILRDKISYYELQDTELP SIVFHGRRFLDTRIVYCHMSK LQERDYINVRKLCNNEMFEKNMNNVSLAVLGP  
LNLINNL DILQDQKELYPNLKISNGVLYGDELVSLNISSKFYFIARISLTGKHFYFSNSTYGGLIK  
YIMLSNGYSEHNGSQGTNPKTIGGR LKTFIVTSKMKSSLEELLAVYN SPNNDGSRIMFLFSSNIMSESY  
TLKEVMHIWFM TIPDTSQYNQILGRSIRKFSYTNIAEPVNVYLLAAIYADFDD DITSLDNYSIDEINVL  
PFDIKKLLYLKFKTKETKRIYSILKDISVYTLPPHPQIVDVVLGELTRQFFYHHSRVRADDP ELFAAIDV  
LCSDSTRRYLDEITRGHFFVCNRVFEKALLYRHGEDIIVVPFKLSHDQFLWAINFRKEYNVGMEIRCLNW  
FEARGEERALYLKAKTRAGDTL FVRFPHYYYYYVVDGGT LSTLAPPPASLGEFELACIDELADALHARPR-  
SQLWLL EAQPRQIAGLLAEFMHITWFFLRNEIEPNGCYRVPAL EPVCARCFHCAAPRAFATRVPLFEVTH  
TYLFFDI ECQFDKFKFSPVFSNPVSHISFCYVDRGTERFSLN SDLLES-----  
RGCRIATPEFALEPGVTF CSEVLLQLTKRLLERHFD FIVTFNGNMFDIRYVSNRLQLLTSSVFRLPDQR  
EPVKLVIYERSLGGMANTS FHVNNNGTIFFDL YTFIQKAERLDSYKLD SISKNVFHCRRV DAGAGCTL  
GGNAEDRLRFCEVLQTGNYV TLDTVHVRI LGRKFFEHG FALRVCAESYAPGSLCELAFGKDDVDLREL  
YRHYS LAAALEMERYCMHDA CLCKYLWSYRVP SKIDAAAATYLLPQCLALEYRASTLIKGPLLRMLRE  
RVVYVRTQEPRTYGGGKVFLPRQK LFDTNVMVFDYNSLYPNVICFGNLSPETLVGVVANAHRLDAEINMQ  
ELRRRFP EPAFLHVLCEARARDYSEI AVFDRRRQGIIPKLLGTFMEQRARYKALMRAASSLERTLYDSMQ  
YVYKVVANSVYGLMGFYNS SLYSYSSAKCCTTIGRVMITYLDRVVDGATLCAGVLLAAPNPLLASD VDV  
AALGHELELFRSVYGD TDSIFLELNLREVQTLAVARTLERVLNEHVL FENFRVEFEAIYQNLILQSKKKY  
STTKYAADHAGDPEHVSKGTSETRRDVSRFHKLMISRYKAQLVALLAEARSSRQVCIEM LRSLEVDLFEF  
AARQPLEFLLSRMHHRNYKAPDNPV LVRNRYNRENLEPIELGERYYYYAYV CASEPWQLAVANVRNHERI  
VDASYVLPERRV FYEYFRRLATELVNLLDNKPLCEFFTRLFGVRPVFSNMSFLAMDDKLYTDLK KLVGA  
QPLYLFTARGDFVEVARRSEFRFRVPAGFFAGEGVALRGFPAGSAMPDAARLPRLYPQQQVVAELIAKAC  
REQRPLYVTLHLACGFGKTVTASYLLGTHRRRAVVCVPTKMLLQWGAVLAALRVSVYVSGEGVRKLSVL  
RTRDFSVLVVVKHFADPGFCALVHERYDV FVLDESHTYNLMNLTLMTRFLSFFPPRICYFLSATPRANR  
VYCNRVVNTKFSALRKTVRV LSTFFPPFSNARIREFVQRLDVHNKYHIYTEKALAE DPRNASIVAVTAF  
EHRDAHRVLLITKLRSHMLMHAALSARLGAQH VFLGDAQSRHTPEIVCEL RASERFVSTLYSGTGLDI  
PHLDTLVVCHAVMNHMQAEQLLGRICRETEQPRRTVYVFPTS VREIKNMVGLFAQRFITLATQKLGFTQE  
RQVQEARFARASLLRPF RMALVGGSGSGKTYLLSLFRTL VGAYRHIFLFTPVLNSAYDGYVWPDHIQKV  
SSEELEYTLSAKK KIERYVASRGGERFL LILDDLGDMLRSRTLLGLLNYGRHLNVS LAMLCQTYKHVPV  
NGRASITHLCCCNVSESDVENMMRSM SIKSKLLLQAMAVMRAKARQVLIVEDSEQRICYDAADERV LAR  
LDSILLRQF SHMKSQ LAIVAG-  
YTVNPQLVVLVDRQQQLREVRYLSLYGTLDEASPLYFAKQHLRAETLAVERRHILLTKISQLKGYLCH  
LLGLREDIIYSHKNNLEYSYVDNTIFNPFTMTQKKTLIKAD SFLYNVYVDACDFLVVWVARAQDTPVPE  
FGSFEEVDANILKFEARLVEMFPELDLEFSIQSKFN NVFRTNLR TGLRNIVKRNQD-----  
NRLFIKTDEFFIMSGNH FVLNNE LNSIWD AQGRLAISSDGD TITVNDVRLFTELVT DNLQMERIKGDIT  
YRIFLLSPITSKIKLDIETS FIFVETATN NILL SADKKISII LAKNHISIKVKNHIPNIEKYFTFLVIFI  
NRMFNAVQQAVDFTKIETIYWSRICQNT RDKNRKPVI VSSLDANMERVSDNFFRSPTREVFVNSNIMFS  
CDPLGKYNSVGFLAIFYKLQKMCIPCCFLRSQAHTDTFISCVH HRELD RQVSPYVNLNFGKIVTEAKISFL  
PILFDQFFNEGLRIEF EADHKRLKATDGYHVVKCCTREITRLRTQ RDIIQFVNAEQNTLIAGDMVYFPMH  
GARSARVYILIQEIVHEVVVQKAHDSIRFELERNRLWEFFPYVPARIKEEHGLVLT TDGIFYVDGKLFSE  
PLSTRYVAFTENVG TAGVA AKYFAPVFKYVVTEAELFIKTWLLNVMMLGLTGESSAAQTRELERYYS-  
NALRCHGCKHNGLVLEQGYEFCIFCQAVFQHCAKVKRSNFHVS NKLIHLRNVLRRLSKQCSGDIIAELR  
ALMARNQLAPADIDANFVSSFLKAHEKINYKLVFEIINQIKDERLELDTQKINEVIEIFKHLVFFCQENT  
PSKTINYSFFLDKI FTLTSVTRNLRPQTVKNYTKNNSNQLWENFLVYMRGKKNLNTVDYGHEYVFDHFAA  
CSLELMKNLPGVFAFPDNETIFAHAYSQRELEAMPARAGFAYA AAWPLSKHRWRGAFVCRQRGV LKLNLEA  
GAERVPRSEPSDRLMHRGADGTVM SFECYSFLRCRGL ELREAGLALLRGLVVGGNRMRIFSRAAAATSAG  
MLGNPFRAPFASLRIDAQAALFRAWAARRPTVVTGGTGVGKTSQVPKLLLWFNYLFGGTEDLDLAPA-  
RERPVVLSLPRVALVRMNGHALRRALGFDAL EGSPVELRYGDLAPADANSSRSPFRLVVSTNQLTLGALF  
AHGTVILDEVHEHDQADIMLAVLRV HARVDSIVLMSATLEDDRERLQEFFPDAEFVHIPGSTRFEIRGV  
YVRNSDRDAAYDEEERRNVSAALSHRPRGRCGILFVASVAQCEDYARLLTREHPLGVYVHGKTPNVDAL  
LAEVYASARPCVLVSTPYLESSVTIRT VTHVYDTGRVFPAPFGGRQMLISPAMRTQRRGRVGRVMPGTY

VYFYDPRLAPIKRIDSEFLYNYIIYARHYGLVLPDDLYVQPSDLELLRRCCEEYLDGFGGLAPERLFELAST  
RYLRMVEYAKIYARGGAAELNRFERDGVVTEVDLASIRALNLRARVLSARARRGLHTCEVAFGPYAGTR  
FLLNRRRLRGDIFMVERTSFVL-

MDQKLGFKFLEPDPKNVRYRPLHFQYESYANFILYRLREILAVRRTLLSFKNDTERIVLEIDKIKVTPPE  
YSPIIASIKGKYDALVTFTINIYKEVMTKEGVTLTKISSYEGNDSQLIKIPLLIAYGNKNPLDPAKFVS  
PNIIGGVFINKQSIEKVGINIVEKITTWPVKFKVVKPNAFTFSFSSVSPVNVLPKYRHYKITDLAQLEC  
TISSSKTFITVNVLLLQFLANVGLDFIRNSLAYDMPPEAVYLVNALVESTRRLAAADDFDVAEYVAELI  
EAEHAKQRSPAKLEDFRYDMLQNFLPHMHSGNQLKGLYLLSLLRKFLFCTFFPSRYPDRDSMICHRIPTY  
GKYFETLANDELENYINNIKTDLFNNHKNRGTCTVNIHVLTTPGFNHAFSGLLSGKFKKTDGSRTHPHY  
SWMQNISIPRSVGYYPDQVKISKMFVSRKYHPSQYVYFCPSDVPERGPQVGLVSVLSVYVTNIRTDEY  
LALEQRIREYVYSYPQVNISFFETGFLTENALVAVLNPHLVDDFVADFKTRKRNFENMELGITLVKDH  
MNEVRVNIIGSGRLVRPFLVHVHGVLMVDTVGAELDARMETMTFSDIQREYPHVLELVDEQFTFSNVCES  
AARFRALPEAERLYDYVDFPAEFRDGYVASTLVGVNHNSGPRAILGCAQAKQAISCLSSDLRNKIDNGI  
HLLFPERPIVLSKAVETSKIANCFGQHVLIALMSYKGINQEDGIILKREFVQRGGLDIVTAKKHQVEIPL  
ENFNKERVKSTAYSKLDSNGLVKLNAFLEPGDAVARNISSRTELEDDNQISFDIAERYTDMYPSRVERV  
QVDLTDKVKVRVLTIKERRPVLGDKFTSRTSQKGTAVYLADEAELPYDDDGLTPDIIVNSTSIYSRKTIS  
MLVEIMLTAAYAAPYNNQDQNRPICFSSNETSIETYLAFAKCYESVFPPELRETELQARLFCEKTYD  
PETDEPYAAAVFMGPIYYLRRLRLTQDKATVRCRGKTKLIRQANEGRKRGGGKIFGEMERDCLIAHGAA  
NTITEILKDSEEDSQDVHVCEHCGDIATRKNVLCIRCTKLNLSPLTRVDTTHVSKVFLTQMNARGVKV  
RLEFEKQEPFYSPKPMAVIARVSYSLYTQNEINANDILINHVKNDDVGTVKDSRLGAMDGVL CRTCG  
RTELECFGHWGKVRLYETHIVKPEYIHEVIRIFNHICSRGLLRSREPYVPELGTLSHLKCLKDKISSKK  
KSCWNNKCMQPYQKIAFSKKNVCFVVKIDDIPNALLYQKITSIHRSFWPLLEIFQDPANLFYKGYFPIPP  
LIIRPAISFWIDSIPKETNELTYLLGMIVKYSNMNAEEQVLQKAVIEYDNIKIINNNTSSINLSYITSGK  
NNMIRSYMVARRKDQTARSVLGPDELSITEVGIIPDYVRNTLTKVFNVAFTVPAVEELFRNEVKFYFNK  
RLGQLTRIKPNKFVKNKIHLPGDWVETRVREFTSIIIFGRQPSLHKYNVISSSVRATSGDTIKIPPGIAN  
SQNADFDGDEEWMILEQNPKSIVLEQSILMYPATLLKHDVHGMPVYGAIQDEILAAYALFRRDLSLAAVRN  
ILGKYGAGFAGAPGARFSGRDIFRFLVQDIYYPGILEAGEIVAEDIDSSFVAMKHSAGLIADYRSSL  
EGIAFIDRSSYVFKRYLRIYGFVTFRNLPDFRFVNRHLALNEKINLVKAAQRQYLAADVAGAVLPLSPG  
DEAEAVDAMLSGLTMNMVREIEAYMRRTLREDPDNLRLMSCAGYKVNPTELMYILGTYGQQRVDGEAVE  
PRVLGRVLPYFPPDSRDPEGRGYILNSLMQGLTGSQYFAMLIARSQSTDIVCETSRTGT LARKI IKKME  
DMVVNGYGQVYVYGSTLIKYAANYAKVLGSVCKPVELIYPHEGLEWFLEISAIWERIKHGFYISQRQKLAR  
VILAPFNFQVFRPAPRDAMPKALYDLIQAVVEDVRENYFFGVSDIDFIEYVFLTHLNPVRVIRSRATA  
TLIFAKLYEKLNYTLGGGLPIGIISAQVLSEKFTQQALSSFHTTEKSGGVKKGLEFNEFNNTNL SKNKTE  
IVTLISDDRLQTVKINFVCLGELMPRISVRRAGAAHHTIDIVNRLYVKRHALTELVEHMIKVFVAFS  
VLVKDWGLETTVEDAYNIRFTVASFVPEQELNKNKFMMLPGAANKGKISKYKIPIEYQYDDFHSTRFR  
MTVELMSLKELGIFNLLGVNVPGIWNTYEIFGIEAAKSFLCEALLGTYGEGLDYLYQPCDLLASLLCMNY  
EPESINKFKFGAASALKRATFGDNKALINAALHKRTEPVADNSSCHFFSKVPRIGTGYRYFVNLELLKT  
LTQVVEKKVEDIATVEDFLEPLEYFRELVAEFERAADTDVHHEVELIFVRPPLVTL SHLLGIATRQESY  
VLFSLERE-

GVKLRTRLPLARVHGLDMKNNQLVEAIDSILWEKKTRVAQRDFPACLLRHSTEEQYVFLDFRNFNSAIRL  
ELVNVQARVRNIVVDFKLYFLGSGAQTRNSLLAVLNYPKFRPSVTLEFEVLRAAFSPRELLRELLVLGN  
LLFMAPAEHVFLMPPKEPLTTHMLKKQDLTLELRDLYVTGKTGVTVHVAGASVYCFSSHLYAIRYPAR  
VTLPAPVLFGEAVRAQSKQLTVYL IKLMAPALEDRL EEEFVLRRLQGLCERVAFQKQYEGPFATSSSELD  
ALAQMLAAQPEGVFLFYARGSRGDLKLRDNTVDQAVNVIYRYSEPVIFGDGVTFLFKRFSNDKGFPK  
EFRLVLAEGARYLNNIYCLEFADTHSGVGLRKVVVPVKFVGEFSDHGRLRPRLAKTMLYLSNNYYGNQA  
SVVLEHLQDQRLRVGDVFREDKLADAGKAAADAHRLNPDTAYFTKRRVRGPLGVL SNYVKTL LISLYCSK  
TFFDNPNKRKVLAVDFGNGADLEKYFYGEIALIATDPDARAIECGRERYNKLNSGNSKSKYYKFDYIQUETI  
RSESVASVREVYFYGKFDIVDWQFAIHYSFHPHYATVMRNLAELETASGCRVLTITVDGDFLATLTRKR  
SFVIHRDPEPENYISFEKLDSEHVLVYNPSTMAKPMVEYIVRKQALVRVFGYGFVLDHVDVHTVVHRS  
RAFIGVAQMESRTSTKNFFELNRAALQCRGLDVEELLQYVVVYVFAKRRRISLPSVTISAPRAVLRQRQE



PLSCVLP EYYYYTVAQLRLVNSERARCWFCSQAVGAWAIETLHGHWGSFCSRICRDSFASTVRTVALREEP  
KVTLPLVFFQHPEKVLELIRLSREGIYGTCCFFDERAAVTLTLRSLH

>Myxvi

MNNTVIALIGNEDYVKRHNVFGVDVQTPTLYMPQYITINGIVSGTSSFEIRDQYITALSHFVLSIDLPEV  
KGIGKFGYVPYVGYKCIQHVSVASTECTIWESGEDYINSCVNNETAMANSYSHELNDVSVGLTPNDTIK  
DAATVYVYIKTPFDVEKTFSSKLSDSKVTVTVTFNVPVSDVIVRDTTFNYEAFVKDFVYVSELSFVGYMV  
KNIQPKQTYIERPRRVLSQLNQTAVISEVHSVTSGLYIKPYYGNRFISYPGYNQTERDYICAFVERLL  
EDLVIVSDTVPSTFPDSAEIVEVPPGIVNIQDQDVFVKIDNVPKDMAVYHTNVLVFGTRKNSVYVYNSK  
KFSITGTYSVTKRIMFSHISHSVNITDVSIPVSIWTCQRNIYNGDNRSEYSKSKDLFINDPFVKGIDFK  
NKMDLISRLEVRFGNDVLYSETAPISKIYNDLLSGCDSGIRMLRFNFTPTFFKPTTIVSNPSRGKDKLSV  
RVVFASIDPNNPISYVSKHLVLICHDLGIHNDSGINVVKITDLNEHIFVLKSIGVPNSRQSEDPRFVD  
IFTCDELENYICNNPTCTLFETLRNEEYSVVRVFFDVLDDVVLDEIDYVAALDFILEVTKFVSFSVECD  
APQNKVLKMRNSFSITRTTDPDKTSFHMI FPDVYTTMHTLIAMKKPLLEFLRSENPLIRSIDPAVYRRK  
TTLRVVGT RKAANNDKIHKQPPHTNISDYLFTYVRMHRDSCYFSLKRDDMSELWEPNYIHFDAMKKIAKA  
VNEIINFKDLDTNFTTVP LVIDYVMPICALCKKTHKHHHMISIGNGLKLYKAGNPHSCKVKTILEGNKLF  
TISQIIMDSNVIHLTDRGEYIVWLKNAWKFNDDPIITKLVLMKDQLPTEYVDILCPRKRKVIENNLKD  
MLVDVTE TDVHPCILPFRNGVLDINGTFYTGHSKDFICTVSTGFNLNMEKL-

DNSEEMKELVIINDIQPTEENKQNRELYERTLASCLCGTTKQCITFFFGETATGKSTTKLLHSAIGSLF  
IETGQTILTEVMDKGNPFIANMHLKRSVFCSELACSTSKRIRADNIKLTEPCIVGRQCFSNRINNKNH  
ASIIIDTNYKPVFDRVDNALMRRISLVRFRTHFATATNMLNKAAYDDVKPLDETLDMKIQKNYYRYAFLN  
LLVQWYQKYHVPLKLFSTPEVPDFAFQLKVESLIVSSSSTHTHISSLSKIGYVMDNLVLPAPFQQLAKH  
FNVRVHGHDI ESFIRHKKFNVKEEYLEYIFIEDITSKMNSVIELFRHHVNNIPNILPHQLATLDYLVRSI  
IDENKSVLLFHIMGSGKTI IALLFALVASRFKKVYILV PNINILKIFNYSMDVVINL FNADYILENIFIY  
STTSFY SINYNNDVINYNGLSRYNNAIFIIDEAHNIFGNNTGELMTVIKKNKIPFLLLSGSPITNTPTIT  
LSNIIISLMSDEEINFGDII IQGKKVFQILLNEHGVNVLKNILKGRISYYKMPD TDLPGIQYHGKSFLDTR  
VVYCNMSKLQEKDYINVRKMCNNEMFEKNMNVSLAVLQQLNLINNDILQE QDKELYPNLKINNGVLYG  
EELVTLN ISSKFYFITKISLKGKHFIFYFSNSTYGGLI IKYIMLSNGYSEYNGSQGTHPKLIHGRPKTFA  
IVTSKMKASLEDLLVTYNSLNDGDSQIMFLFSSNIMSESYTLKEVRNIWFMTIPD TFSQYNQILGRSIRK  
FSYKDITQPVNVYLLAAVYSDFNDTIESLDDYSLEEINTLPFDIKKLLYLKFKTKETNRIYSILENISDY  
TQPPHPHIVEIVLGEIVRQFFYHHSRIKHNDERLLAAVKVL TNEAAKKYIKEIVDGHFFVSNKVF DKSLL  
YMYNDEIITVPFKLSHEPFVWGVNFRKEYNVVMEIKCINWFESKGDKRFLFLKARNKNLETIFVRFHYFF  
YYVVTEDVYKTLVPIPSILDSMSIVDISETNNYVSDRKKMANIWL IENKKRNIPKVMDEF LNITWFFISN  
DVSPEGCYRIDSLEKLNKCYHCNDPKLFSNPISRFEVPRSYLFLDIECHFNNKFPVSFINPVSHISCCY  
IDLNDERFTLLNEDMLTEEHEASRGYRAESYD VDYKKEFILCTEITMLRIAKKLELSFDFIVTFNGNNF  
DLRYVSNRLELLTERIFKSPDRQEVVHL CIYERNLGGVSNTTYHVNNNGTTFFDLYTYIQKSEKLD SYK  
LDSISKNVFNCDVLEIQNDMTFGDDAKATVNVFSQVLSTGNYINIGDDIFKVFNKITITKDSFTLTVKAN  
PSYTVHNTYTL SFGKDDVNLSDMYKNYNLDVAVEMGNYCLHDA CLCKYLWNYG IETKADAGAFTYILPQ  
SMVFEYRASTLIKGPLLKLLEKKIIMTRSEKKPYEGGKVFAPKQKMFINNVLIFDYN SLYPNVCLFGN  
LSPETLVCV FVANNKLEAEINKQEI QKMPGPRYISVQCEPRSEDVSEIAV FDRSVEGIIPKLLKTFLTE  
RLKYKMIKETNDVEKAIYDSMQYTYKIIANSVYGLMGFKNSALYSYASAKSCTAIGRQMIHYLNSVLNG  
CKLSSGKFLAAPNPFQDDLYASTNL PTEYNYFKGVYGD TDSVFLEINTNDVLSIKIAKELERVINTKVL  
FDNFKIEFEAVYKNLIMQS KKYTTLKYVPSSQNSPVRINKGTSETRRDVSKFHKYM IKIYKTRILEMLS  
DGTSSLQVCINILKSLES DLLEFETRKA PLDFLLSRTHHCNYKSIDNPMLVNEYNKNNPERIEIGERY  
FAYLCAKAWQKLVNIKTYERIIDKGFTLGSTRIFEVYFKRLATEVVNLLDNKVLSSFFEKMFGRPI  
FYNMSCSEIDYALYTELKKFLNSQPLFLFNADKNFVEVVPSSSFKFYIPIGVFSNSDVALIRHTTCTNIE

SATFPNLYPQKRVAEVS MRQKSTHRPMTLHLSCGFGKTITACYLMVVHRRKTVICVPNKMLIQWCAA  
VELTKLSYIISTDGVSVLLKQLRKTADVLIIVSRHLSNDYFCKKIHDEYDTFILDESHMYNLMNNSALT  
KFLT FYPPRICYFLTATPRANRIYCNVNVNVLKVSTLMKRLKIVEYFFEPYSTE CIRQMAKHLNENNKYH  
IYTEKILAEDPRNNLIVDTVRFKHGLVERVIVVVKLRKHMTFYDKFVEEFGTDYVYLGDAKNKDTSAVVK

SLLOKFFIFVSTSYSGTGLDIPSLDSLVIICAVLNSMQIEQLLGRVCRESESVKKTVFLFPTSIREIKH  
SLGFFTERIVSVSTDKLGFQEGEFNEKQFSRKSLLRPFRIALVGGSGSGKTAYLLSLFDLTVTKYKHIF  
LFTPVYNSAYSIVWPDHVNKVTTEELDYALITKQKIEKYVEKGTAKAFLLILDDMGDKQTKSSCLLDFL  
NHGRHLNTSVLLCQTYKHVPVNGRTSITHFCCCNVSDSDIENMLRSMITSKDLKLSISIMKSNKRRV  
LIIEDSEQRVCYDCADEDVIAHIDSILLKQFESHMHNLKILSSMYVNPQLVLYVEKGQKIKRALYLTPY  
GTLDDKSPIYYFLSTHLKITDPEVHKRHILLTLKISQLKGYLCDLLRIRNDVIIYSHKNNLEYSVDNTI  
FNPFAHTQKKTLIKSDGFLYNIYPDACDFLVIWVADAEDTSAIEFGSYEDVDVNILKFETRLLLEVFDL  
LDMTIESKFNNIFRTNLKTGLRKLKIKINEFNGSYKLLYKSDEYFILTGNKFILTDDELNLTVWSDGCVT  
FSSDGDITIMINNVKLFSTLLTDDLQMERIKGDVYKIFLSTPITSRIKLNIEFSFIFVETATNNILLSAD  
KRISIIILAKNHISIKVKNYIPNIEKYFTFLVIAINSMFNNIQQASDFTKVETVYWSRICQNTKNKHKRPV  
IVSSLEDEMKEVSDNFYKSSSTKEVFINSNGIMFSCDPLNKYNYVGFLSIFYRLQKMCIPCCFLKNQSHTE  
TFSSCVYQKEIASDINPYILNFGKVVTKSKISFLPIIFDSFFNEGVKIIFEQDNKRLKETIGYHVIKSCD  
EDIKRLRTISDIIAFVNEDKNILIAEDIIYFPMNYVDIGRVYILIQEIVHEIVVKHMSKDIEVPPNYKL  
VKNLFPRTKITIRSDSGMELTTDGLVDGKEFNVDLSSNYVAFTKNITTPYTL SKYFSPFLFKYAITESNR  
FMKTLWINTMLLGIDLDD-

TNII LPEKYYPHKMNLKCSGCSHNGIVSENGYEFVFCESIFQKSSKIKKSNFHVSNKLIHLRNVLRRLL  
SSQCSGEIIESELLELMQRNQISTNDVDANFVSSFLKAHERINYKLVFEIINQVKREKLNLTTEKINEVVE  
IFKHLVFFCQENTPSKTINYSFFLDKIFDITLVTKNLKPQTVKNYTKNNSNQLWENFLSYMKTKKKASMD  
FGHEYVFITEFTTCSLEVENHLPNIFYFPNCVTAFPYRYTQKELDDMKPVDRFKYAVFPLIKHRWCRAVY  
VRDNHTFKLNVERLRVAYPTLVVNAREYVMEDGTKISFECYSYLICKTTLHDVDDSTIRGLVEGGNQL  
NIFTNSGVTNTVGI FGNPNPKVPLKSLHPSMQCKIFTSWARRVPVLTGDTGVGKTSQVPKLLLWFNYLF  
GGFTDLSLTFEVQEKPIVLSLPRVALVKLHSETLLTSLGFEEIHGSPVSLKFGNMQERFVNTRFSRYGIV  
FSTHKITLNTLFKYSTVILDEVHEHDQTGDIIIAVCRKYRKLDSLFLMTATLEDDRRRIEEFFAESVVFH  
IPGGTLFSISEAYVKNSDLNRMYIEEEKRNLANAICYTPPQSSGIVFVSTVSQCEAYKQYLSERLPYKFY  
IIHGKVQNINDVLSDIYDNDGVSIIISTPYLESSVTVRNATHVYDTGRVYIPSPYGGCESFISKSMRDQR  
KGRVGRVNPGRMYVYFYNVELRPIKRIDFEFLHNYVLAKVFDLQLPEDLFVKPTNVTRLHDVIEYIRSFD  
ISDDVWTRLLSSYYIHILEYAKVYARGGSALLDSFERTGNLTDDALDAIKSLNMRRAKILSHKKAHYALR  
CKLLFGVYAGKVFTVHKRPLTGYITMIAEHSFIPYMDQRLGKFLVDPKGVFYRPLHFQYVSYSNFINH  
RLQEILSVKRTLLSFKNDTEKIVIEIDNIKITPPDYSPIIASIKGKSYDALVTFTVNIKFVMTKDGTVI  
TKISSYEGNDSHLIKVPPLLIGYGNKNPLDTAKYVVPNVIGGVFINKQSVEKVGINLVEKLTTPKFRRIK  
PNVFTFSFSSVSPHVLPTKYRHYKILMDISQLECSISSTKFTITVNIFFLLAQYLSRVSLNFIKQSLSYD  
MPDEIIYLVNAVIESTKHFVDSNEFDIDTYINDLFIEEHTKQKSQVSLDEFKHEMLYNFLPHMNTPNQLK  
GFYIISLLRKFICYIYTSRYPPDRDSMICHVLTGKYFEILAHDELENYIGNIKTDIINNHNKRGTHSV  
NIHVLTPGFNFHAFSGLLSGKFKKTGYSRTHPHYSWQNIISIPRSVGFYPEQVKISKMFVSRKYHPSQY  
AYFCPSDPPERGNQVGMVSQLSVLTSVTNICTNEYLDLERKICEYVRSYDVKDISYFETGYVTLENALIA  
SLNPDLTAFVRDFRRKKRGYFNSLEIGITHVADHMNEIRINISSGRLIRPFLVIESGELIMDTV-

PELADKLDDMTFSDVQREYPHVIEMVDIEQFTFSNVCESVQKFRSLPKSEKVKYQLCDFPSEFRDGYVAS  
SLVGINHNSGPRAILGCAQAKQAISSCLSDIRNKIDNGIHLLYPERPIVSKALETSKIANCFGQHVITIA  
LMSYKGINQEDGIIIVKQFIERGGLDIITAKKHQVEIPLFNFNKERVKSTAYSKLESNGLVRLNAFLES  
GDAIARNISSRTLEDQDNQISFDIADRYTDMYKSRVERVQVDLTDKXVVRVLTMKERRPILGDKFTSRTS  
QKGTVAYIADENELPYDENGIKPDVIINSTSIFSRKTVSMLIEVILTAAYASKPYNNDGKNRPICFPSSN  
ETTIDTYLNFQCHHTHTYPDASDEVINDKIFCDKTLYPDETDTPYTAKVFMGPIYYLRLRHLTQDKATV  
RCRGKKTKLIRQANEGRRRXGGIKFGEMERDCLIAHGAANTITEILKDSEEDYQDVVVCENCGDITANIQ  
GNKICIRCSKQNLSTLTKVDTXHVSKVFITQMNARGVKVMEFEKREPLFYKLLPMAVISKVTYSLYNO  
EEINATDVFINHVKNDDDVGTVDGRLGAMDGALCKTCEKTELQCFGHWGKVRLYETHIVKPEYISEVIR  
IMNHLCCIRCGFLRSREPYLEDVTKMSHLKLLKDKILSKKSCWNSKCMQPYQKITFSKKKVCVFNKSDEV  
PNALIYQKITSIYRRFWPILLEIHQKPENLFYKNFFPVPPLIIRPAISFWIDSIPKETNELTYLLGMIVKY  
CNMNADEQVIQKAVIEYDDIKIISNNTTSINLSYITSGKNMIRSIVARRKDQTARSVIGPDTFITINE  
VGVPAYIRNTLTEKIFVNPFTLKTQKLFDNHIKIFYFNKRLNQLTRIKQGGFIKNIHMLSGDWVEVALK  
ENTSIIIFGRQPSLHRYNVIASVVKYTEGDTIKIPPGIANSQNADFDGDEEWMILEQNPKAVIEQSILMYP

TTLKHDIHGAPVYGSIQDEIVAAYSFLFREDLTLDEVMNLLGKYGIEFDARGKTKFSGKDIYTFLLIGEKV  
NYPGILKDGTVIAPNVSSDFVVMRHSAGLIADYTSNVEGVNFIKSSYVFKRYLEIYGFVTFKELPS  
SDFTNKLEAVNEKIELIKAAYERYLCDVREGKILPLSKSMEADAISSLSNLTNLNIKEIEEYMKKTLDQ  
NPDNNLLKMAKAGYKVNPTELMYILGTYGQQRIDGEPKVMGRVLPYYLPDSKDEPGRGYILNSLTQG  
LTGSQYYFSMLVARSQSTDIVCETSRTGTLARKIIKKEMDMVVDGYGQVTYGNVLIKYAANYTKISASVC  
KPIELLYPHESMVWYLEISALWDRCLKHGFIYSQKQKITKKILSPFNFLVFIIEEDENAIGDKDLFNMIQE  
VIEHVRENYFFNVSNIIDFIEYVFLTHLNPSRIKISKLTATNIFKKFYDKLNYSLGGTPIGIISAQVLSE  
KFTQALSSFHTTEKSGAIKKLGFNEFNLTNLSKNKTEIITLISEDKLQSVKINFVCLGELNPCITL  
TRNEDGIHTIDIIHRLYIKRAELTELVVEYIIERFVAFNVLVKEWGMETTILDEHRIQFTIARFVEPEEL  
SLNKFMMVLPGAANKGKISKFKIPIEYDYEDFNKTKKYKMTVELMNLKELGTFDLEGVNIPGIWNTYDIF  
GIEAAKGYLCEALLNTYGEFQDYLYQPCDLLSSLLCISYEPESVNFKFGSVSALKKATFGDNKALLNAA  
LHKKSEFVNDNSSCHFFSKVPRIGTGYKYFMNLELLKLTISKQKVEELSESEEFKRGTDYIEELIR  
VYEDVQTDIDINHEVELTFIHPPIALSTLIHVATSQESYILFTV-

TNKGVKIRNRINLSKIHLGLDKNLQVDSIDNIIWEKTLVKEHKVDPVAVVKYSTEKEYIFLDYKYLSS  
IKLELVNVQAKVKHVTVDFFKFLGSGAQAKSLLHVLNHPKSKPNPSLEFEIVTEKIDSVSLRKELVA  
LFKLVFMTSPDNIILDGLKPPVQTVMLKKNLDLIDLTNLVYTTKTDGVVITVTNKGIYCFTHLQYTIYR  
DTTFKSDNPVLYGEAIKNN--

VWHVYLKLMTPKLSDRFKEDYVEEHLKIDCDRMIFKKKYEGPFESHSEIIDLLTSYLPSPQEGVVLFY-  
SDQRNQDYKIKLDNTTDMVNIYRYSEPVIFGENSTFLEYKKFSDDKGFPKDYKLALTDNVRYLNNIYC  
MEFANAYEDVGKINVVPIKFISEFSATGEFIKPRIDKTFRYLYMEYYGNPYQVVVTHIRDQSIKIGDVF  
DEDRLSDVGQHANDKYRLNPDVSYFTNKRTRGPLGILSNYVKTLLISLYCSKTFDLSNKRKVLAIIDFGN  
GADLEKYFYGEISLVATDPDKEAITRCIERYNSLNSGKSKYKFDYIQETIRSTTYVSSVREVVFFGKF  
DLVDWQFAIHYSFHPKHYYTVMNLAELTASGGKVLITMDGDLLSQLTDKKT FVIHKNPSSENYMSVEK  
IHEDQILVYNPSSMSRPMQEYIIRANLTKIFSEYGFELIDCVHFDTVVERSFRFIGVSKMEERKSTKNF  
FELNREALKYEGTDIGDLLRYYIVYVFSKRKRVSQDIVISSPKSVIKPRDESLTCILPTYNTVANVSI  
VNTNTVTCWFCKQDLIPLRVETLKG-

VGYFCSRICRDSFAAMIKTVALREPKITLLPLVFYKPEEVINIINLRNKDGVYGSFCFYKENDSVQISL  
RSL

>Nilcr

MNTSIVSFLGSREAAKSKNVFGVDPQETTYMPQYITVSGIRCDVRYEVKDQYINAANYFVLTVPLPEI  
KGVGSFAYAPHVGYKCIKRVQFSSQRGLIWEEGEELFAASR-

GSNIAACSGYSEKLCMSTGHTPNVDIKESELIYVYLRTPFDDESTISSLKIANDKIVIEVAFNRISDVV  
IYDAAFNIDAFAGHFVYQPDLSFIGYTVKGLQAKPAYLQIPRRVVGSLNITSNSLGEVYSITSLSVYVKP  
CYGNKFIAYPGFDQTPAAYVKAYVERLLFDLLTVSAERPSNFPPESDIVRIASDIVTIQDIDVSVCIDGV  
PAGKSLYFHRNLLVFGTRRNGAAYNISKKFSICGFYNDVNDTIIYTEVLHTVDMLDVSIPVKLWNSERNI  
QAGDNRSAASKAKDVYINDPFLKIDLLGSFDPVERMEVRFVGHMYSDFPISRIYNRLLTSAIAAERK  
LIFNYTQCLFKPTILQADHSRQKDLHVKGKRLDNDPIHYVDRQLVLACNDLYRISYDNSVKVSKIN  
DENNRVIFVLKRIGVSRERASGNLNLCEFLVPELEEYIRARPECTLFECLKNEENSRRVFFDVDLREP  
LVAEQFAESFKTFLLLTKFLAFVHFCSSKRAFLVARSYLSLSDDPEKVSFHLIFTDMYTSVRTLVA  
MRRFLSREVRSSVNPLMRAVDVAVYRRNPSLRVVGTRKTPECRYVHMTAS-

TDLADYLYTYVDVTPSSYVFEYEA--

APDAAPAVSMSFKILVRLQTI VNEITNLDRLNNTLPGTPLIIDYRFPCRLCGKASHKHPHHVAVQEDLRI  
FKAGNPNSCRKTVLAQNKLFAISERIMEAGVHKNKYGEYIAWIAGRWETETDNHHLTRLVLSMKDAVD  
DD-

ELVLVPSNRRIENNLKDMITSCVATDLFPEKLQFDNGILDVTRFHRGEEGKDFVCTVSTGYEYAP---  
TPADPAVTELRVLDIIPQTTGGNAGNREVFVRLSSCLCGVNKPYIFFFYGDTSSGKSTVKLLRSVFDGL  
FTETSQCILVEPFDKGNPYVSSIHLKRVTFCELSNKNVKKIRSDNVKKTENCIVGRACFSNKISNCN  
VSTIIIDSNYKPVFDKVDNAIMRRIGLIHFKTHFSNLNRPCLGNSYDVVKKLNAELESKIRTYFRGAF  
TLLLEWYAKHHLHLSLEPTPEIPDFRFRLLDITIIAPSDSTHAKMPSLVRRGYHVAGLPLSADFRTLV  
HFNVKIYGSIDGFIKKNKYNFCDEYMEYVFIEDLGSKMNLILKLFKEHVDTIPNLLPHQIATVDFLVR

ILVEKQSILLFHIMSGKTIIALIFALIVSKYKKVFIIVPNINILNIFNYNINTAENLVNTDYVIENIHI  
YATTSFYSLNYNDNIINYNGLSKYEDSVFIIDEAHNIFGNNTGELMTVIKNKHRVPFLLLSGSPITNTPI  
TLTNIINLMSDVEINFNDIIIQGKKVFQITLNEGKVIKDVLRDKVSYELEKKEKLPDIVFHGRRFLDT  
KVVYCPMHPLQERDYINIRKMCSENFEMNTNVS LAVLGQLNLINSLDILQDQEKELYPNLKINNGFLY  
GDELVTLNISSKLYFVRTIRLKGKHFIFYFSNSTYGGFVIRNVMLSNGYSYDNGSRVSNPKMIDDRVKRF  
AVVTSKMKSSLEDLLEVYNPNAEGHEIMFLFSSNIMSESYTLKEVRHIWFLTIPDTSQYNQILGRSIR  
KFSYANLQVPVNVYLLATVYGDFFDEIDSLEQFQLEEINSLPFDIKKLMYLFKFKTKETLRIYSILQEISV  
YSLPPHPYLVDVILGEMTRQFFYHHLRVNYRDNALRKKFRVLPDDRVEAYLSRLVEDHFFVSNKHLKCL  
LYRVKSDIIVVPFSLKYNKYTLQINFRKDKNVFMDIKCLNWFENLREKKFLYLKARTSARDAVFIRFDIH  
SYSVTDD-----PSASAELGQFRVMHAEVVYTPAAPPTERELFLVE----  
ALESYLTGFLRVNFFFVRHNVDPGSGCYRVASLSPLGRKCFHCLDPGAFATPIPLFQVPSSYLFFDIECRV  
GKKFPSAFSDPVSHVSFVYVDRGAERFTLINSDLLPAEPP-----  
EAACADVDTARPLTFCPELVLLRFCKSILEQEFDYVVTFNGHNFDIRYIQVRLHVLAEEIFSLPDGSERV  
RLAIYERNLGGLANVSYHINNNGSIFFDLYNFYIKREERLECYRLDVVSKNAFRCHALVAATPDAATREE  
AGDVARVFREVLTTANYVTVGSRVHIAAKSETGEAGFTVAPAPGAEYAVGSTHLLAFGKDDIDLQRLYGD  
YRLATAETIAAYCLHDASLCKYIWHYYSVDCKIGAGASAYLLPQYLSLEYKSSTLIKGPTRLILLENRIA  
LLRRGKPAHYVGGKVFAPANKVFNSSNVIVFDYNSLYPNVCMYANLSPETLMFVLVNRNRLDRELHASELR  
RLYPFPDYVHVETSTAEPNYNEVSVYSRRREGLIPKLLANFIKRKDYKARSKRAGSVEAKLFDMSQYVY  
KIVANSVYGLMGFRNNALFSKNSAKSCTAIGRAMIEYLDEVLNGSSIIDNVLLGRPNIFSGEDKAVPLAA  
GLEDEVFRSVYGDTSIFLEINRRDVGTLRLARAMEEIIINDRVLFGTFRVEFEAVYKNLIIQSKKKYTTT  
KYPAGFEGDPILVNKGTSETRRDICA FHKELVNRYKTKLIDLLEQGRSSAEVSRLILRDLETFEFD-  
RRPQDTEFLISRMHNNYKRPDNPFLINAFNAEHEDKIEIGERYHYLYVCAEPWTFNPTDIKSYERVY  
RG--  
RLPDGRIFLEIYYRRVATEVVNLIDDRPLADFFKRVFVGSRPLFSSMSYVVIDDKLYSAIRSLIGIKELYL  
FNSDGDFFVEVHKRSGFRFLIPVGYTSLAVPADRYDYGDNLPPDQRLPELRPQRRVVAEILEKCLKLERRP  
LYTLLHLACGFVKTVTASFLIGSHAKRAVVVLPNKLLSQWEEVVARLGVYAAASYEGVSKLLPRLRDRDY  
AVLLVIDRHFTNKEFCRLVHERYDVFLDESHTYDLMRNTAMTRFLTFFYPPRIAYFLTATPRSNALFCNE  
RVNVTVASSLRRHLRVVKEYREYRTPKMAAYLARLDPANKYHVITEKAI AEDYRNETIVKTLLEYAAGSV  
DAVLVITRTREHMFLRDGIAALVDPASVFGDAEKRETAETLQALQTRERFVLVSTLYSGTGMMNLPLGLDA  
LFYTVAVSNSRNI EQALGRILRDGPRKDRYLFVFPSTSVRRLAGCLEGHTAR-VEHVARQLGFG----  
IEEVFRDRNSLLADFRVLVFLGGSGSGKTVYLLSLLRGMVRKFRHVFLMLPVPNSAYDGYVWPDHITTVAN  
HQLDYALLYKAF AEELAKASRRKAVLLVLDLGDQLQYRSRELAPIFNHGRHVNIISVAVLCQTRFHIPHSC  
KTSITHLVCCSVVMNDLENLLKYMSVAEKKKLLRFVDMFCNKKRKVLIVENSRRARVCTDVVDKRVLAGLD  
DVLRAQFSRMRANLEAIEE-  
YKVSPQLVILAGPDQRIERVLYLTLYDAIDETAPLFYFVKNFLKAENVEVHRRHVLLTLKISQLKGYVRD  
LLGL-  
EEIIYSHKNNLEYSYVDNTIFNPFTLTQKKTLIKLDSFLYNVYLDACDFLVIWAARAADTAF AELGSYD  
EVDKNILKFEERLIGTFDQLNLFNSITSRFNIFKTNHTGLKRFIANNVD----  
RRLLLRSDEYFILSGNNFVLNNELNLSIWDDNDQLLIVSDGESIVINDVELFTE-  
ISDDVQLERIKSDITYKISLTSPISTKLKLDIETNFVVFVETATNNILLSGDKKISII LARNHISIKVKNN  
IPNIEKYFTFLIIFLNRVFNVSQVSKDFTKIETIYWSRICQNTKTKNRKPVVVGSLDGDMDRVAENFYEG  
GGREVFVNDHDMFSCDPHQRYMHLGFLNIFYKLSGLCIPCCFLEAQKHSETFRACVFKTLPLETVSPYI  
LNFGKILTPTKISFLPILYNNYFNKENAICFEVDNKRRLRSTEGYVVVKALDDVIHRLKTESNII SFVDAS  
CSVMIVNDLVVYPSDVKINRIHILIQEIVHEVVVRKQLRSDIAFEP AENKLLRFYPYTDVTIFEGEGLR  
LTTKNFYVDGEPFTEPLSTKYTVYIVNVNPLTQVYKYFSRFFKFVVTNNEIFIKTWVINILLGAP----  
PTVGRSLEKYYKN-  
NSLKCNSCKHNLVTEYDYEFVFCESIFTIHVKTKSSFHVSNKLIHLRNVLRRLLSRQCSSHIIDEIM  
TDIERYNISSQVDANFVSNFLKEKDKINYKLVFEIINHVRNDTLNLTTEKINEIVEIFKLLVFFTQENT  
ESKTINYSFFLDKIFNVIGVTANLKPQTVKNYAKNNYNQLWEKFLRFLDGKCLANVDYGHYVFGTYHSP  
CSLEV---

MLDLFAFPNNVDVFPHEYSQERLEELNAADPFSLAVFPVHKHRWADAYVVRARGVYRLSAE---  
TALPEADPDFRPTYADAGGVKVSLECYSMQLQCRGLRLADLGLAVKRGLVAAGNRLGIFSAPREATSVGRL  
GNRDFRVPFRSLGLETQVRLLRHWLDGDVVVLTGGTGVGKTSQVPKLLLWFNYLFGGFDGYDFRPEFRER  
KVALSLPRVELVRMNAVLLRSLGFDDFDGSPVEMGYGNMDPALANSRPRRYGLVVATNKLVIIGRLGQFS  
AVVLDEVHEHDSIADIMIAVLRKNRVRALTLMTATLEDEPALRAFFPKAAFVHVEGGTLFGIKTLSVR  
NKDKQRQYLALERRLISQTLRLRPLGSSVVVFLASVNQCLQYARFLEPLHPLAFYVVHGKVPNIGALLAE  
IYASPKPAVVLSTPYLESSVTLRTAAYVYDSGRVYVAKPFGGEERFISRAMMMQRKGRVGRVSPGTYYAF  
YDALLAPIKRIDYDFLHEYVIYFRHFGLALPDDL YVRPTDPGPLRRTVAYLAGFGIPDEQLYEIATTRFV  
KLVEYLRVYAAGGPAELNEYERGERLDEPLAAALRALNLRKVRTRTKQTYAYAMRVLFGPYRGAEFVS  
HRKFVKAYVYMIAPGVFVE-  
MEQKIGYKFLEPDPKGVFYRPLHFQYESYSNFIHRHLHEILSVKRQLLSLKNNTEQVTLEITDIIVTPPK  
YSPIIASLKGKGYDALVTFTVNIYKEVMTKDGIIQSKIIISYEGNDSQLIKIPLLVGYGNKNAIDSMKYLS  
PNIIGGFINKQSIEKIGINLVEKITTWPKFVVKPNVMSFSFSSVSPVDVVIKYRHYKITMDISQLEC  
NISSSKFTITVNIVLLIQYMNADLEFVRANLTYDMPTEVSYLVNCLLESTKLITDCKQFSVHNYVESLI  
QQEYAKQKSTLSLEEFRDMMANFLPHMTSSNLMKGLYLLHLLRKFIFAQYFTSRYPDRDSMVCHRVMY  
GKYFEILAELENYINNIKMDLMNNIKNKSVMVSTHILTPGFNQAFSNLLAGKFKTDGSRFTHTHY  
SWIQNISIPRSIGYYPDQVRISKMFSIRNYHSSQYGYFCPSDIPDHGTQVGLISQLSVHTSITTITTKAY  
LQLHDALVKHLYSYDKQDVSYYANGFVTIENCFVASLNPARVDEVVDDLKRRRKRKYFGNLEFGVTLVRDR  
MNEVRINIGSGRLVRPLLVEDGELVMHREAERLEPLLELTFSDLQARFPHVVMVDLEQFHFSNVCS  
VSKFDGLSPDQRRRLHYCDFPVEFRDGYVAATLTGINHNSGPRSILGCAQAKQAISCLSSDIRNKIDNGI  
HLLFPERPVLSKALETSKIANCFGHVVIALMSYKGINQEDGIVIKREFVERGGDIITAKKIQVEIPL  
ENFNNQESVKSTAYSKLDCNGLVRINSFLEHGDSIAKNISSRNELEDNQSIFDISEIYTEIYSSRVERV  
QANFTDKVRVRALTIKERKPIMGDKFTSRTSQKGTVAYIEDEKDLPYDEDGISPDIIVNSTSIYSRKTIS  
MLIEIILTAAYAAPFNNRGQNRVCFPSSNETDISTYLQFAKECYRSVRPDLSDPALEDLAYCERTLYE  
PETDRYSAKVLMPYIYLRHLTLDKATVRCRGKTKLIRQANEGRKKGGGKIKVGEMERDCLIAHGAT  
NTITEILRDSEEDQVDVYVCENCGDIATHRDSVYFCIRCSKLNLSPLVKVSTTHVSKVFLTQMNARGIQI  
KLD FESNEPLYDE---  
MKPISGVRYSLYSQNEINSTNLIQYIKNEGDYGTTKDNRLGAMDGYICKTCNSTELECFGHWGKVRIYD  
NVIKPEYINEVRLKYICLRGFLRSRDPYLDNLESLPYIQELSNKILSKKSCWNTQCMQPYLKVMF  
SKKKVCLVVKQEEIPNICVYQKLTSHKRFWPLLGLHQNPANLFYKEYFPVPLIIRPAISFWVDSIPKE  
TNEITYMLNTIVKYCIQNAEEYTIQKAVIEYDNKILVTNTSNINLSYITSGKNMIRSIVARRKDQTA  
RSVLGPDSSLSVAEVGIPDYVRQTLTEKIFVNAFTIDRVRELFANKIKFYFNKSLRQLTSLKKNKFIKKN  
IHLLPGDWVEIDLQEFSNIIIFGRQPSLHRYNVISSIRATAENTIKISPGIANSQNAFDGDEEMIVEQ  
NPKSVIEQSVLMFPTLLKHVDVGLPVYGSIQDEILAAYILFQKDVSAAAVLNLLGRYGHEFPAD-  
RARYSGREIFRFLIGYDITYPGILERGSISTENIDSNFIVAMKHSLSGLVSDYASNLEGVRFIDKMSYVL  
KRFLTIYGFVTFRNLADLDFVDELYRANTKLNAIKRAYAEYLDVAAGTVIPLSEFAEAEALDGMNLNL  
TNHNVKAIDDYMKRVLRSDPDNNLLRMSCVGYKMNPTELMYILGTYGQQKVDGKHIETRVLGRVLPYYLP  
DSRDPEGLGYILNSLIKGLTGPQYYFTMLIARSQSIDIVCETSRTGTGLARKI IKKLEDMVDGYQIVYY  
DYLVKYAANYTKTAGSVCKPVELLVPSESMTWYLEIDLWNKLKHGFIYNQGQKLARYLIFPFNFVKVFK  
PTEKEPLPGDRLYGMIIEEFVEDIRLNDFFLLTDVDYIKYAMLTHLNPSRVRITQETFDLVIARFREKLRY  
SLGGGFPIGIIYAQVLSEKFTQQALSSFHTTEKSGGKLGNEFNNTSLSKNRTEIITLISEDKLEAV  
KINFEFVCLGDLFPEISIRHDDDDLYRVSILNRLYVKRESLTVPVVESLVERFVSFVSVLKEWSEMETRVL  
DQYRVDIELLRFVDFNRNKFMMMLPGAANKGKISKYKIPIEYSLEDHNVARPYRLTVELANLKEKGI  
FDLLDVNVPGTWNTYEIFGIEAVKSYLCESSLNTYGEGLDYLPCCDLLSSIMCVNYEPESINKFKFGNI  
STLKKATFGDNKAFINSALQNRTERIQDNSSCHFFSKVPRIGTYFTYYFNLDKLLKAVEQLEEEQEVKLLK  
SAREFLGPLSAMLDELVDYFESARFDARHNEVELILLNPPLSAVSVLHTIATVEESYVQYVL-  
KAKDAKIRNRLSVKDVHGLDVKNYQLVERLDDANWERKAPVWEKSF-  
PATIKHSTEESHPTDYRNYSGNIKLEFVNVRARAKHLIVDAKFYFIGNGSQNYNSLLYALNDPAKPG  
VTLEFEIDSEGFSAELRASLYTVCQALFLAPADSVFLVGPRPPVPTNMLKKYQLTLETADLYVTEKTDG  
VTVLLRDKDIFCHFAHLGYFIRYRGRKFAEPVLMGEMTRGSEKV--

VHFIKLQTPALPDRLEEFVEERLSDLGGITI-  
AKRYHGPYATNGDLIAACATLLREYREGVILFYRHA--  
APDWKLKKVNTVDQAVNVVYRYNEPIILGDRDTFVEFKRYSNAHGTPKEFKLVLSDGVNYLGNIIYCLEFL  
QSEHDTGLERVLVPVKFVGEFSTDDSLVRPRLEKTMLYLYSNYYGNQEAVILEHLEDQVRVRLGELLTGDV  
MAEAGKRARDALRLNPDGSYFSQNRTRGPLGILSNFVKQTISLYCSKTFMDNNAKRKVLAVDFGNGADL  
EKYFYAEAAIATDPDPAIAEANSRYNKLNSGSKSKYKFAYLQATIRSDAYLDEVKTFYSGRFDVID  
WQFAVHFSFHPLHYSTVMRNLAELAAPGAKVLIITMDGDYVASLAEERRFVIHRTQAEDNYLSIEKISDE  
KALVFSPTTMKRPMEEYIVRRADLNRVFEYGFRAIDYVTFYDVIARNRKFVSKLEARPSTSKFFALN  
RDAVNFEGTDLEELLRRYVVVVFCKA-  
MQRLAPISVSDPKAAAKSGGYVVSNILPNYFAVLASERQVSEDGSACWFCRQPLPARRIETLFSRFGYFC  
SRICADSFAAGVKHIPLREDPKVSLPLVLCYRHPERVLAVINLRDITAGVYGGVLFKNR-IDIELKSFI  
>Orfvi  
MNNSVSVLVGGDDAVRRASVFATDHRAPTVMYMPQYITTQGVVDTTTFEIRDKYISAMNNFVLSVDLPEI  
KGVGKMCYVPYIAYKLIRHVAVNSAADTIWESGEELFDSCLDNERVMELSGFSRELNDLSTGSSPNDVIK  
EAACVHAYIKTPFDADKTFSTLKLSDSKITVTITLNPIACVMVYDETFDAKLAKEFPYSMELSFIGYMV  
KNLCPRPAFIEMPRRRVEQINHTTAVITDVHACTSLSVYMKPVLNRFISYPGFQQSEGDFVMAFVERLL  
EDMVIVSNCYPEGFPDTAEIVEVPPGVVSIQDITDVFVRIDDPVGMVFLHTNILVFATRKNSSVVYNSK  
KFSITGAYSRATSRIRFTTAIHSVNIGDASVPVGVWTCQRNVYNGDNRSPEARAKDLFVADPFLKGVDFK  
NKIDVIARMVDFRFGNEVLYSENSAVSRVFGEIL-  
GKTPGVRTLQFNFTPTFFSPTALNSNVSRGDKLAVRVTTAHMEAHNPLMYVPRQMVVVCNEVYRLSYDA  
GIVAEKVTAIDNSHVFLKRLGVPSSRRSEDPRFVEILTPFELSNYIERHPGCCLFETLRDEECVVRVF  
ADVDMDSVLEEDFVAALDELIVELAAFFDFASSCGTVPGEVKRMLANFSVTRSTAEHKTSFHLIFTETY  
TTLDTLVAAKRPLLDLCRRSDNVLLRALDITAVYRHGATLRVVGTRKTPESSAVHMQSPDDDIKDYLFTFV  
ELSDASVYFELERQHLSTCWETSYPFDAMRRVCQAVNDIVNLRDITDNFLDTPLVIDYATRCALCKKPK  
HKHAHHITMGNGRLRVKGGNAHSCKVKIILEGNRLFTAAQIIIIASEVVKLTERNDYIVWLNNSWRFSAE  
SLITKILDLVRHSLPADYADMLCPRKRKVVETNIRDMLVDISETDTQYDKLPFTNGVLDLTGFEFLTGDRA  
KACVCTVSTGYAFSREEAAAASEAMRRLVVINDIQPTPENAEENRALYERAMSSALCGATKTVIVFFYGD  
MTGKSTSKRLLMSALGGLFIETGQTVLTDVLDKGNPFPVANMHLRRAVFCSELACNNARKLRSDNFKKLT  
EPCIVGRPCFSNKIHNRNHATFIIDTNYRPVFDNRVDMRRVALVRFRTHFSAATRAAHNVEYSVAVKEM  
DESLDTKIQRNYFRYAFLRLLVQWFGKYHVPVSLAPTPDVPDFAFHCRVAELVVASNDTHRRMESLSKLG  
YVLGGNVMPADFRQLAAHFNVVRVHGGDIDAFAFMKHKVNVVTEEYVEYVFIEDVENKMNSVIKLFAGHDES  
VPGILPHQLATVDFLIRRVLDNVSULLFHIMGSGKTVIALLFAMVASRTKKVYILVNVNVMNIFNYSM  
VMVANLFNAPFVAENIFVYSTTSFYSLNCDGNNYNGLSKYENSVFVDEAHNIFGNNTGELMMVIKKNK  
TRVPFLLLSPITNTPLTLSSIIISLMSEKDVVDIVVQGGKVFQILLNEHGVRVIREVLKGRISYYEM  
PDTDMPEVLVHGRFLDTRVVYCRMSRRQEDDYLTVRRLCNNEMFEKNMNNVSMAVLGPLNLVNNLDVLDQ  
AQDKDLYPNLRISNGVLYGNELTKLDISCKFKFFISKVAMRGKHFYFSNSTYGLVIRNVMLSNGYSEF  
GGSQSNPHTTDGRAKTFIVTSKMKASLEELLEVENANSANNDGGELMFLFSSNIMSESYTLKEVRHIWFM  
TIPDTFSQFNQILGRAVRKFSYADVAAPVNVYLMAAVYSDFDEDIVSLEDYSVEDINALPFDVKKLFYK  
FKAKETNRVYAILQELSDYSARPHPQLVDVVLGEIVRQFFARHCRVPAEDAALVAAVEVLGTEAAAAYIR  
AIVDGHFFVTNKTFGKCLLFRHERDIVTVPFELEHDPFAWAINFRKEVSVVMELKCLNWFENRSDSRFLF  
LKARRADNAVYLRVQHFYVVRADAVADIAQPLTRLGPMSSVVSIDEVARSAKIRQREIELCLVSRK  
APPEFMSDFLNVSWFFVAHDIDPDGCYRVDALRDLGSNCFHCDNPGCFAEKIPRFNVTRSGFLDIECHF  
EKKFPSVFKNAVSHISFCVVDKGAERFTLTNSDMLSDDEEARREIVCLDPDVKFDAEVTLCPEVTLRVA  
KRLLEMPDFVVTFNHNFDLRYLDSRLSLLTEHIFRLPDGTETVNFVYERTKGGVSSTTFHINNNGT  
IYFDLYAFIQRTEKLDYSKLDIAISKNAFHCTAVVDARPDVRFGDDADGNAAVFARVLSTGNYVTDERVC  
RVLHKRVDDEGGFTVDLADSAARAPGDRVTLAFGKDDVSLADMYANYSLDVCLDMARYCLHDAACLCLYLWS  
HYGVETKIAAAASTYLLPQSVVFEYRASTCIKGPLMKLLENRTVMVRADTKKFYEGGRVMVPKQKMHDK  
HVLIFDYNSLYPNVCIYANLSPETLVGVVSDNRLDAEVAADVRRMFPAPRYIAPCEPRSPPEVAEVAI  
FDREAKGIIPMLLSFLDARAKYKLMKAAETVDREIYNSMQYTYKITANSVYGLMGFRNSALFSYASAK  
SCTAIGRTMIAYLERTLDGASVCGTRLLAAPNPLLRDEIDAAGERTERVFRSVYGDTSVFLVGVASD

IASRRVGRCLERVINEHVL FANFKVEFEAVYCNLIMQSKKKYTTIKFAVS-  
DGGSERVSKGTSETRRDVAPFHKLMIRKYKDMLCRALAEEG-  
SGNVGVEILRSLEDELTEFEARSMPLDFLLSRTHHKNFKSPDNPVNLVTRYNAANAEEAIEIGERYFFAYV  
CEEGPWRRIANVKSERYVVDKTFKLDKNRIMYEVYFKRLCTEIVNLLDNKAMCLFFFERMFGSKPVFTGM  
FGVQVDDKLYAYLKKLAGGRPLCLFRDNGEFVEVFAGSAFRFVLPVGLFADLRVRTRGFPDRDSAMRGVDT  
LPSLYPQRIVVDEVARDQLAAGRAVYVTLHLACGFGKTLTACHLIATHGRRAVVCVPMRMLVQWRAAAVE  
LRVPFAVSCDGAASLLRSGELDRAMVAIVVSRHFANDDFCRAVSRQFDVLVLDESHYNLMNNTAVSRFL  
TKYPPPMCFFLTATPRANRIYCNRVVNVSVVSRLLTKVVRVVDAFFEPYTTPKIRTLERSLEPQNKYHVFT  
EKILGEDHRNKLIVDTVMAAGEARRVLVLTCLREHMVLHAALRERLGAETVFLGDAKNRKTPEVTRALR  
DKDRFVLVSTVFSGTGLDLPNLDALAVAAVNLNRMVMEQMIGRVCRESHANTRTLFVFPSSVRAIRDTVS  
AFAQRLVALAVDGLGFVRERAVQEVRFKRESLIEPFRMALVGGSGSGKTAAYLLSLFRTLVRFRKHILLFT  
PVYNAAYDGFVWPDHIHKVTTEELEYNLSAKRKIERHAQKQK--  
FLIILDDMGDTQTRSPTLLGLMNYGRHINVSLLCQTYKHIPVNGRASITHLCCCNVSDSDVENVLRS  
SIRSKRLIRAMAIMRSGTRRVLIIEDSQERICYDFADESVKRLDGILLAQFSHMKTRLDIVDAMYTVA  
PQLVVLVGRHQEIERYLYLSLYDSVDEASPIYFFAKQYIQ-  
KDPEHVRRHILLTMRVRQLKGYLGSLLGLQDEIIVYSHKNNLEYSYVDNTIFNPFSPQKKTILRTDGL  
YNAYADACNFLVWVARAADTSAPEFGSFEENPDSILKFEERLIREFANLDLNMNVETKFNNIFRTNLR  
GLRAIAQQSPDAEVGFDLLSKTDDFFVMTGTRFMLVDELNLSVWGPEGDLVISSDGKTLTVNDVGLFTKL  
IESDVKMDRVKGDITYKVSLLNTTITSKMKLDMETSFIFVETATNNILLSTDKRISIIILAKSHVSVKVKNY  
IPNIEKYFTFLIVAI SVMFNVKQSSDFTKVETVYWSRICQNTKTKNRKPVIVQSLDADMAKVSNNFFKS  
ETREVFVNGNGVMFSCDPDGRYNSVGFLSIFHRLQRICIPCCFLRSQAHTDTFKSCVYDEEVDRSLNPYI  
LNFVKVVTESKLSFLPIIFDKYFNEGLEADFEADNKRLRATAGYVVHCCGAIIVRLRTVSEIVSYVNAS  
GNVLI SGMVYFPMRLADTAATRILIQEIVHDVVIRKDAATDIH--  
LASGRLASMFPHAARVVREENGLSLTTSGFFVDGKRFAPKLSRFTAFVRNATVPNAVSRHFAKLRHV  
TDADRFMKTWSVNCALLGVEPDS--ARAPALQEFYPP-  
MNLRCGGCRRNGLVSDADYEFCLFCETVFPMGIRVKRSNFHVSNKLIHLRNVLRRLLSKQCSEEVIRDLR  
AMMDRHQIRPEDVDANYVSSFLKDEMINYKLVFEIINQVKNEKLDLSTEKINEVIEIFKQLVFFCQEIT  
PTKTINYSFFLDKIFEVTGVTRNLRPQTVKNYAKNNSNQLWENFLAHMRARKRAAIEFGHEVVFSPAFAA  
CSLDLENHLPDMLMFPNCVSVFPFEYSLEDVFRLPEERRFAMAVFPLSKHRWRGARLQORDERSVWLSVER  
GRLGERNCS-  
LSVARMVDEGRAVTPPEAYAFMRAAGARVAEADAGVLAGLVAGGNALRVFSARGKARVGVGLGNAPLPVP  
LASLRPEVQRELF AAWIGRRPVVLTGGTGVGKTSQVPKLLMWFNYLFGGFERLDVR-  
EFAERPLVLSLPRVTLVRAHTATYLASLGFGSADGSPVSPRYGAIPDAERNTAPRTYGLVVATHRLTLTA  
IRRYDTRVVDEIHEHDQMGDIVVAVARKLSNMRSLLVMTATLEDDRARLEEFDRPAFVHIEGDTLFP  
EVYVKNTPQLSKYAEAEELQNVVQALGFVPEGKCGILFVATVAQCALFAETIEARHPLLVRVHGVKVP  
AVLEEVYAADRPAVLVSTPYLESSVTVRTATHVYDTGRVYVPEPFGGRETFSKSMYTORKGRVGRVAPG  
TYVRFDTLALPLKRIDSEFLHPYVLYARIFGLTLPDDLQVPSDLALLRRTEEYVDGFGISLSRWTQLL  
DRHYMHMVEYAKVYVRGGRAALDAFERTGVMTHEATEAIRAVDMLAVVLNVRKSKDYRAECKVLFPGFAG  
KKFVVGRPPGSHVLMVTDRVFIEMEALGYKFLLPDPKDVYRPLHFQYESYANFIKHRLKDILTVRR  
TLLTFKNGTESIVLEIDDVKISAPEFSPIVASIKGHSYEALVTFVNIYRHVMTKDGLTVTKINSYEGTD  
SHLVKLP LLIGYGNKNALDPSKFVVPNAIGGVFINQKQSIKLGINMIEKITTWPKFRAVKANSFTLSFSS  
ISPVHVMPARYRHYKILLDVNQPDFVISSAKFITVNVIVMVQFLADVTFVARNLCFDMPEAAHLAT  
ALVESAKTVPA--  
GADVAEYVNALIAAEHAKQKSTLSKEEFYEMLSNFLPHMESANQLKGLYLLSLVRKMFVCFVFPNRYPD  
RDSLVCHRVTYGRYFEALAMDELETYIGNIRNDILANHKNRGTCTVNIHVLTPGFNFHFAALLSGKFR  
KSDGSFRTHPHYSWMSISIPRSVGFYPEQVKISKMFKVRMYHPSQYGFCAVDPERGPVGLISQLSV  
LASISNIRTADFVELTKRVCDYVRSYPARDISYFETGFVTVENALVASLNPAIVDAFVLDLRRRKRGGFFG  
NREIGVALVRDRMNEVRINFGAGRLIRPLLVENGVLMDAEAERLERDLSALTFSDVLRFPVHIEIVD  
VEQFSFVSNVCDVSRQFRTLPPPEERLFDVDFPAEFRDGYVASSLVGINHNSAPRILGCAQAKQAI  
SADLRNKVDNGIHLMAERP I VSKALET SKIANCFGHVVTIALMSFRGMNQEDGIILKRQFAERGGDI

LTCKKYQVEIPLNFNNRERVRSAAYSKIDVNGVRLNAFLEQGDIAARNVSSRTLDDADNQISFDIAER  
YSDIYAARVERVQADLTDKVKVRALTVRERRAILGDKFTTRTSQKGTVAIVVADETELPHYDENGIAPDV  
NSTSIFSRKTLMLMEVILTTAYGHKPFPAEDGSNRPICFPSTNETDFETYIEFARRCYALSHPEADDEP  
EHRVFCERVLFDPEDEPFAARVFFGPLYLRLRHLTLDKATVRCRGRKTKLIRQANEGRRRGGGKIGE  
MERDCMISHGAAFTVAEILRDSEEDAQEVLCENCEDIAARLNGTHVCIRCSKMSLSPLTRMDSTHVS  
FTTQMNARGIKIRVEFEKQDPCFYGTPKRMSVVARVSYSLYSQSEISATDVVISQLKNDEDLGTVKDP  
GASDGSICRTCGLEMECFGHWGKVRRIYESYIVRPEYIPEVVRLNLHLCVRCGLLRSDPYTADVAALSH  
MRKMKDRMMSKKKACWNSKCLQPYQKIVFSKKKICFVNKVDEVPNALIYQKLTSHRKFVPLLEVFQDPA  
NLFYKEYMPVPLLIRPAISFWIDNIPKETNELTYLLGMIVKYCSMNAEEQVIQRAVIEYDNIKIISSNS  
SSINLSYIIAGKSNMLRSFVARRKQDARSVIGPDSALSVCEVGIPDYIRNTLTQKVFVNYLTSKR  
LFDRAVKFYFNKRLRQLTRIKEGKFIKDKIHLLPGDWVEIPMSEGTNIFGRQPSLHRHNVISSTAR  
GTYTIKIPPGIANSQNAFDGDEEWAVLEQNPKSVEIQSVLMPVTIFKHDAHGAPVYGSIQDEIVAAYSL  
FRQNLSDDEVLLNLLGRYGRDFVPEGQKTFSGADVFRFMIGADINFKGVLENGRVVAPNVSDSLV  
VAMRASLAGLIADYATNVEGVRVDMASYVYKRYLAITYGFGVTRFDLPDPSLVRRHALNEKIEQIK  
DAYSRYLQDVADGKLVMPAPADEADALDSLLSNLTNLNVREINEYMRETLERDPDNNLLKMARAGY  
KVNPTELMYLLGTYGQQRVNGAVAETKIYGRVLPYAFPDSADPEARGYIINSLMNGLSGSQFYFAM  
LVARSQSTDIVCETSRTGTLARKVIKIMEDTVVDGYGQIVSGSVLLKYAANYAKIPGSTTKPV  
ELLFPHESMTWFLEISALWSKIRHGFVRMHRQRLATKILAPFNFLVFKPPSEAAALSARDLYHMI  
QRMNDVREKYFFSLANVDFMEYVFLTHLNPSRVTRATAELIFRKLYQKLNALLGGGTPVGIMSA  
QVLCCEKFTQQALSSFHTTEKSGAAKLGFNESNLISMSRNHTEIVALTASSKLMPLKVNFEFV  
CLGELVPEIETRPSRPSVHRVDIVHRLRIKRAHLTEVLVDTIIERFVSFNVLVKEWGSMTV-

EGDRVYTYTLRFRVEPEQLNFHFKFMLVLPGAANKGKVSFRFKIPIETTYDDFDAARKYRMNIE  
LMSLKELGIFDLEDVNVPGMWNTFDIFGIEAARGHLCEMLDITYGTGFDYLPSCDLLASLLCSG  
YEPESVNFKFWNASALKKATFGDGRALLNAALHNRTDAVADNSSCHFFSKTPCVGTGYKYFVN  
VEMFREIQRVAARKMEEIEEAEFDASLDCMLAALAAKAASVPEDEVHHEVELVLDPPPLSTLAAT  
LRLASETESFILFTVAKEEG-KLRARVPMSRVVGLDVKNVQLVNAIDSIVWERKALVEETALQ  
ECLLRHSTERRHLFVDYKKYLSAIRVELVNVRSKEVVDFKFKYFLGSGAQAKSSLLHALNHP  
KVRPSPTLEFEVVAEAVDEAAVLTELRAVAKALFMAPTDAVFLPAEMPVRTMLQKQEI  
ALDLDGLFAVSKTDGVAVRVDENGVFCAFSHLAYTIRYPLAREVQGRYLWCEAVRVGERV  
WSMFVLVVEEPAGDDRVAAGAVEALRGVCARVEFKKRVDPFSATSELVEHISKALQTEPE  
GVFLFYARGEKSKDLKVKRDNTVDQTTNVMFRYSEPIVFGEGSTFLEFKRYSNDRGFP  
KEYRIFLREDVVYHNNIYICIEFTKTHLEVGLRSVVVPVKFIGEFSQEGYLLRPRLAKTE  
CYFRNSFYGNQHSVLEHTRDQLLSVGDVDFDESMAAVGQTANDAFRLNPDPYFTNRRTRG

>Squvi

MNNTVISLMHTDDAAHRANIFSVDCRKPTLYMPQYVTMAGVTDVPVISFEVRDQYINAMNNI  
VLCLELPEIKGVGRLGYVPYVGYKMIRHVSIVSVHGTIWECEELFESVRSDPVALELSGYS  
RELNINIGLTANDTIKAAASIYVHIKTPDFVEKTFSSLKLADAKVTVTFTFNPIVDVIVYD  
GTFDIDAFVRDFSVAEMS FVGYMVRTINNKPSFIEIARKTVSQINQSTAVVTDVHAATSL  
SVYVKPYYGNRFIAYPGYAQSESDYVSAFVERLVEDLVIVSADYPTGFDPDAQIVEVPAG  
VVQVQDAEVFVKIDNVPCGMQVYLHTNILVFGTRKNSFVYNSLKFSITGVYSSSTNRVIM  
NVSHTVNITDASIPVSWTCQKNVYHGDNRSDASRERDMFVNDPFLKGIDFNKTDVIAR  
LEVRFGNDVLYSESSPVSRYNELLTGSRGAVRSLRFNFTPTFFRPTTISSNPSRGKDKL  
SVRAIYGTMDPNNPIAHVPKQLVVVCNDLYQVTHETGVRATKVVAVDNKHFVLKRLGVP  
SSRQREDSRVEVFTCEELERFIANNPKCTLFETLRDEEYSVVRVFDVLDLTPMDGPDFL  
AAIEDLILELSAFVGFAAECGAQAEVVRMRSNFSLTQSTDADRTSFHLIFPDAYTTMETLI  
AMKRPMLFARSSDNPLIKAIDTAVYRHKATMRVVGTRKTPDDERVHRQPPHEDISDYLF  
TYVDLHENSICYFLRREDLPDMWDPGYMAFDAMRRVTQV



LNEIVNLGEITDNFATTPLVIDYVAPCALCRKRSHKHPHQLSLGNGLRIFKAGNPHSCKVKVIEGNRLF  
TIAQRIVEANVIHFTERGDYIVWMRGAWRFNTEEPSITKLVLMGRDPLGEYGDLLCPRKRKVVESNIRD  
MLVDPVDTDTHADKLPFSNGVMDLTGTFHTGDAAKEFLCTVSTGYRLPEQAAPESPALLEEIIIDDIQP  
TPENAENRALYERTLSSCLCGTTKPCLVFFFGETATGKSTTKRLLISALGGLYIETGOSILTEIMDKGPN  
PFVANMHLKRAVFCSELACSGAKKIRADNIKKLTEPCIVGRPCFSNRINNRNHATIVIDTNYKPVFDRVD  
NALMRRVALVRFRTHFASNDGAAKNEAYDDVKPLDESLDRKIQRNYFRFAFLHLLVRWYQRHHVPLRLEA  
TPDVPDFAFQRRVGSLLIPSGSAHVMPPELAKLGYVLDGAVLPAHFQORLANHFNARAYGHDMESFVRHK  
KFSSNEEYLEYIFIEDVASKMNVIRDLFREHVDSIPNILPHQLATLDFLVRVLEKNHSVLI FHIMGSGK  
TIVALLFALVASRFRKVYILVFNINIMKIFSYSDVAINLFSADYVAENIFLHSTTSFYSLNYNDNIINY  
NGLSRYND AIFIDEAHNIFGNNTGELMTVIKKNRVPFLLSGSPITNTPITLSNIIGLMSDEEINFSD  
IIVQGKVFQILLNEHGVDLRRLRGRISYYEMPQTDLPEIVYHGRRFLDTRVIYCHMSKLQERDYINV  
RKMCNNEMFEKNMTNVS LAVLGPLNLINLNDILQDQDKELYPNLKISNGVLYGDELVSLNISSKFKFFIN  
RISLTGKHFIYFSNSTYGGVLVIKYIMLSNGYSEYNGSQGTNPKMVAGHPKTF AIVTSKLGASLEDLLAVY  
NSPNDGSRIMFLFSSNIMSESYTLKEVRHIWFMTIPDFTFSQYNQILGRSIRKFSYADVSKPVNVYLLAS  
IYSDFEDEITSLDDYSLDEINVL PFDIKKLLYLKFKTKETTRIYNILQDISDYSMPHPHYIVDVVLGEIT  
RQFFYHHSRVKVVDPRLTEAINVLNSEATRKYIDS IADGHFFVSNRVFDKALLYRYGDEIITVPFRISYE  
PYVWAVNFRKELSAIMDVKCVNWFESRGERKYLKARTREGAAVYFRFNRYFYYVSEATLASLAPPAA  
ELGRMSIIDIDEVSRDANLRPREEDLWLV EPHRRSIVGYMTDFLDVTWFFIANEIDPCGCYAVDSLEEVR  
AGCFHCEDPKCFAARIPRFDVQRTYLFMDIECHFEEKFPSVFTNPVSHVSCCTVDRGAERFTLLNEEMLS  
EDAEARRGCRARSAEADLSREVVLCEVVMLQITRLLIESAFDFVVTFNHGNFDLRYVANRELLTESVF  
RLPDHSETVKLCIYERNLGGVANTTYHVNNNGTIFFDLYAYIQKSEKLSYKLSISKNAFHCRARVEA  
VGDCVFGDDAPSRVRAFAEVLSTGNYIT IADGVYKVLKRVADGRFELRVRFGAAA--  
GETHEL SFGKDDVDLAAMYRDYDLDALEMARYCVHDASLCKYLWHFYGMETKTDAAAATYLLPHCLAFE  
YRASTLIKGPLLRMMLEQRKVFRNARKKLYEGGKVFAPRKKMFENNVAVFDYNSLYPNVICFGNLSPET  
LVGVMVSGNRLEAEINAQELRRRYRPPRFLCIECEPRSHDVNEVAVFDREAEGVIPMLLRSFLDRRAEYK  
KLMKSASGIERGIYDSMQYTCKIVANSVYGLMGFRNSALYSYASAKSCTTIGRMRITYLDSVMDGAAVCG  
GEVLAAPNPFDDSAAVAIDVDPVAMLRVYGD TDSV FVEMSTKDVATQRVARELERVINQRVLFANFR  
VEFEAVYSRLIMQSKKKYTTMKFAAG--  
SVAPERVSKGTSETRRDVS RFHKEMIKSYKTRL TDMLSEGGSSQAVCVSVLQSL EQDMREFERRALPLEF  
LLSRTHHCNFKSPDNPNMLVMRYNSENPEVIEIGERYFFAYFCDAAWQRRLENVKSHERIVDRGFRLGA  
DRIFYEVYFKRLATEVVNLLDHRELSQFFTR LFGTRPLFYDMSYTEIDDKLFSELRNLVGEQQLNLFTQK  
GELTEVFQSSFRFLVPVGFFAASRYPPRGFR PANMPDAESVPELYPQRRVVEEVAARKKREGRPYVT  
LHLACGFGKTVTACHLIAKHRLRAVVCVPNKMI IQWRAAVEATGASHLVSVDGVSSLLRELRTVTPSVLV  
VVSRLFHGFNEEFCLVDERYDVLVDESHTHNL MNNTAMARFLAFHPPRVCYFLTATPRVNRVYCNDVINV  
TKLSTLRKTLRVSNA YFEPFSTPRVRAIVRMLDPQNKYHIYTEKALVEDPRNAEIVRTVDF AAGAINRVL  
VIAKLRSHMLIYNALVERFGEDVVALGDAQNRKTPERVDIRGRARFIFVSTLYSGTGLDIPSLDSL VVC  
VGVMNAMQAEQLLGRVCRD TDHANRTVFVFPTAIREIRSVVGLFAQRLVALATQKLGFERDAPVQEKRFC  
RKSLLRPFRIAMVGGSGSGKTAYLLSLLGLTLDGYRHVLLFTP VANPAYDGYIWPDHIQKVTTEELEYAL  
ATKSKIERFSAPGRKGEFLIILDDMGDMQTRSRTLLGLMNYGRHINTSLILLCQTYKHVPVNGRASVTHF  
CCCNVSDSDVENMMRSMIRS KQLMRAMGIIRAAQRRVLI IEDSEQRICYD SADEDVLARLDSVLIRQF  
SHMKRQLHILTSMYVVNPQLVLFVGRGQEIQRALY LTPYGELDENSPLFYFMSRHINVTQPEVLRRHILV  
TLRMHQLKGYLCHLLGLDDDIIYSHKNNLEYSYVDNTIFNPFAHTQKKTLIKTDGFLYNTYVDACDFLV  
IWARARDTVVPEFGSFEEVDPNILKFEARLLEEFPHLDLNM TIETKFNNIFRTNLRTGLREIVKRTQEL  
EAGHGLLSRTDEFFIMTGNRFVINDEMNL SVWDADGSLALSSDGVTTITVNNVNLFTRLVSDDPQMERIKG  
DITYKVLLETPIITSKIKLDIETS FIFVETATNILL SADKRISII LAKHHISVKVKNYIPNIEKYFTFLV  
IAINRMFNSVQKSSDFTKVETVYWSRICQNTKQKHRKPVIVSSTE EGMVRVSENFYRS DEREVFNKNGV  
MFSCDPNGKYMHLGFLSIFHRLQGICIPCCFLRDQSHNETFASCVHNRD VDRSINPYVLNFGKVVTESKI  
SFLPIIFD TFLNEGMQADFETDNKRLRSTTG YHVVRCCAGGITRLRTTADIIRYV NEDKNILIVGDMVYY  
PMNAAEMGRVRILIQEIVHEVIVRKKANRDI EFPLSGGQLRSYFPYAREPIKSDSGLTLTTDNFLIDGVP  
FTQDLSTRFVTFTRNASTSGAIAKYFAPL FKYVVVESERFVKTWVINTMMLGLSADSDPREVRALERYYP

SRMNLRCNGCRHNGVVSDDNYEFCVFCDAVFQRCRTRVKKSNFHVSNKLIHLRNVLRRLLSRQCSGEIEE  
LRSLMDRNQLSTDDVDANFVSSFLKANERINYKLVFEIINQVKNEKFDLSTEKINEVIEIFKHLVFFCQE  
NTPSKTINYSFFLDKIFAITNVTRNLRPQTVKNYAKNNSNQLWENFLAHMRSRKRATAVDYGHEYVFRDEF  
TACSLELMEKLPDMYLFPNGVSVFTEHYSHSEFDTMSARDRFSLAVFPLTKHRWRGAYATLHEGVFRVSA  
EAERARASARAPVESGTFDDGQNR-  
ISFECYSFLRCAHTSLAAMDEHVLRLGLMQGGNRMRIFSRRGPRASVGLGNKPPVGLASMLPEIQREIF  
SAWTSRRPIVLTGDTGVGKTSQVPKMLLWFNYLFGGFSALDVT-  
DFEDRPLVLSLPRVALVRMHGAALLES LGFGELGGSPVSLRFGSMPEEEVNRDPRPYGLVLSTHKLTLAR  
LFGFGTVILDEVHEHDQLGDILIAVARKHHRHLHSLMLMTATLDDDRERLEEFL-  
SPAFAVHIPGGTRFPITEVYVRNSREERRYAEELRNIADALRHRPPGACGILFVASVSQCESYKQYLERR  
LRVAFYIIHGKVKDVRVLAEVYANSGPSVIVSTPYLESSVTVRTATHVYDTGRVFPVAPFGGKQMIISR  
SMRTQRRGRVGRVRPGVYVYFYDAAMAQIRRIDSEFLHNYVLYFRQFGLLEPGDLLVRPGDLSKLEAVEA  
YIDSFGIAAARWEAILNKYYLRMVEYARVYARGGRAALDVFEREGLGAEALEAILSLLDLRARVIGVRHR  
NGYVHTCEVLFGPYAGTFLMLHRRPMRGTVRMISSDSFVEAMDQRLGYKFLGPDPKGVFYRPLHFQYESY  
TNFILYRLKEILSVRRTLLSFKNDTERIILEIDDIRVTAPEYSPIIASIKGKSYDALVTFTVNIYREVMS  
KTGTTTTKISSYEGNDSHLIKIPLLIAYGNKNPLDPAKFVVPNVIGGVFINKQSIEKIGINLVEKITTWP  
KFRVVKPNSFTFSFSSVSPANVLPKYRHYKISLDIAQLSCVISSAKTFITVNVVLLIQYLANLSDFDIFR  
NSLTYDMPAEAYLVNAIVDSAPAAYAKNDADTYSYHELIEAEHAKQRSTMTLDEFHYDLMHNFLPHMD  
SPNQLKGLYLLSLLRKFIFCIFIHTSRYPDRDSMACHRVLTGYSYFETLANDELENYISNIRTDIMNNHKN  
RGTCAVNIHVLTPGFNHAFFSGLLSGKFKKTDGYSYRTHPHYSWMQNISIPRSVGYYPDQVKISKMFSVRK  
YHPSQYAYFCPSDVPERGPQVGLVSQLSVLTAITNIRVTDYVELNRRICEYVRSYPRDDISYFETGFVTV  
ENALIASLNPAIVDEFVRDFRRRKRGGFFGNLEVGITLVRDHMNEVRINIGGGRLIRPFLVEDGELVMDV  
VNADLEASIDSMTFSDIQREFPHVMEMVDVEQFTFSNVCESARRFRTLPEERRRYDLCDFPTEFRDGYV  
ASSLVGINHNSGPRAILGCAQAKQAISCLSSDIRNKIDNGIHLVYPERPIVISKALSKIANCFGHHVM  
IALMSYRGINQEDGIIIKRQFVERGGLDIITAKKHQVEIPLNFNNKERVKSTAYSKLDSNGLVRLNAFL  
ESGDAIARNISSRTLEDVDNQISFDISERYTDMYKSRVERVQVDLTDKVKVRVLTMKERRPVLGDKFTSR  
TSQKGTVAYIADESEMPYTEDGTRPDVINSTSIFSRKTL SMLVEVILTSAYAAPYNNQGENR PVCFPS  
SNETGLDVYLDFAKCHGHEHPEASEEEIEDRVYCERLTFDPETDEPYEAKVFFGPLYLRLRHLTQDKA  
TVRCRGKKTKLIRQANEGRKRGGGKIFGEMERDCIIAHGAANTITEILKDSEEDAQDVYVCENCEDIATQ  
TGSTRTCLRCAKLNLSPLTKIDTTHVSKVFLTQINARGVKVKMEFEHRNPVFKAMPMAVIARVSYSLY  
TQNEINATDVLINHVKNDDDIGTVKDSRLGAIDGALCRTELECFGHWGKVRLYETHVVKPEYIGEV  
IRIMNHICARCGLLRSREPYVEDLGSMHLRRLKDRVFSKKKSCWNSKCMQPYQKIAFSKKKVCVFNKSD  
EVPNALLYQKLTGIHRRFWPLLEIHQDPANLFFKGFPPVPIIRPAISFWIDSVPKETNELTYLLGMIV  
KYCNMNAEEHVIQKAVIEYDDIRIISNNTTSINLSYITSGKNMIRSIVVARRKDQTARSVIGPDTSLTI  
NEVGVPDYVRNTLTKVFNFAFSAREVRELFREIKFYFNKRLGQLTRIRPGKFIKNIHMLPGDWVEVA  
VRERSSIIIFGRQPSLHRYNVIASSIRATPGETIKIPPGIANSQNADFDGDEEWLVLEQNPKSVIEQSILM  
YPTTIFKHVDH GAPVYGAIQDEIVA AFTLFHTGLTADAVLNILGKYGRDFVPDGRATYTGRDIYRYLIGE  
RVNFPGLVLDGEIISENVDSNYVAMRHSAGLISDFTSNVEGVDFINRSSYVFKRFLQIYGFVTFRDL  
PNSEFTDRLHALNEKIELIKEAYRRYLDVDRDGKVL PMSAAEEADA VDTMLSNLTNLNVREIEEYMRQEL  
RVRPNNLLRMAKAGYKVNPTELMYILGTYGQQRVDGPAETRVLGRVLPYYLPDSRDPEGRGYIINSLT  
QGLTGSQYFAMLVARSQSTDIVCETSRTGTLARKI IKKMEDVVVDGYGQIVYNNVLLKYAANYTKIAGS  
VCKPVELIFPDESMTWYLEISALWEKIRHGFVYAQRQKLARKTLAPFNFLVFVEPPESEALSPKELYGII  
KNVMDVDRDKYFFGIANVDFMEYVFLTHLNPSRIRLSRATVVRVFEKLYEKLNFTLGGGTPIGVISAQVL  
SEKFTQQALSSFHTTEKSGAVKKGFGNEFNLANLSKNRAEIIITLISEDKLRTVKVNFVFLGELRPEI  
AVHD-  
RGDHYEVTIVNRLYIKRAELTELVEHMIERFVSFVSVLVREWGMETSILDEHTVQYSVLRVFEPAALNMN  
QFMMVLPGAANKGKISKFKIPIEFRHDDFDRTRKHKITVELTNL KELGVFDLENNVPGVWNTFDVFGIE  
AARGYLCEALLSTYGEFDYLYQPCDLLSTLLCSSYEPESVNKFKFWSVSALKRATFGDNKALLNAALHN  
RTEPVNDNSSCHFFSKVPRVGTGYRYFVNLDLLRKLQAQAERKVEELVTAEDFPEPLSEFLGELARAAA  
EVAAVDVHHELELVFIRPPLAALGAIVGLATEQTSYVLFVTVSSRDGVKLRVCLPMSRVHGLDAKNVQLVD

AVDDIIWEKKTLSQRELAGCLLRHSTEERHIFVDFKFKGSSIKLELVNIRISARNIVTDFKFKYFLGSG  
TQAKSSLLHALNHPKSRPNATLEFEVLRADATAEQLAEELTTVARAIFMAHPDNVFLVPVRDPIRTHMLK  
KQNISLELQGLYATSKTDGVAVRVDASGVYCFNHLGYVIRYPALREVEEVLFGAEVRAEDRRWHVHLI  
KLVAPTLESRLLEEFVERRMEGLCDRVVFRKRFMGPFASVSELTDMLTEELPKQEEGVVLFYASG--  
EADMKIKKDNTVDQAVNVTFRYSEPVIIFGDKATFVEYKRFSDERGFPREHRIVIGDSVAYLNNVYCLSFA  
GTHDVTGLSRVVLVVKFVAEFSDGTLLRPRVDKTMRYLYSGYYGNQHSVVVDHLRDQALSVGDVVFGEK  
LAEAGRANANDEFRLNPDTSYFVKNRTRGPLGILSNYVKTLISLYCSKTFLDNANRRKVLAIIDFGNGADL  
EKYFYGEVALVATDPDARAIERG CERYNRLNSGIKSRYYKFDYVQETIRSDTFVSSIRKVFYFGRFDIVD  
WQFAIHYSFHPRHYATVMRNLSLTASGCKVLITTMGDFLSSITSTRSFVINRAQESENFISFERIDDE  
QVLVYNPSTMAKPMAYEIVKKEALVRVFGYGFVLIDHVDVFATVRRGRAFGVARMETRQSTRNFFDLN  
RVALAMRDTDVEELLQYVVVYVFSKRKRVLSDVVISAPRNVYRPREALACVLPYYRSVASARVVAAP  
ADVCWFCAQAVLPLVETMNGGLGAFCSRICRDSFAGMVRVALREPKITLLPMVCYSDPAEVRVAVNL  
RDREGVYGSFLDEARSVHISLRSLV

>Vacvi

MNNTIISLIGGDDSIKRSNVFAVDSQIPTLYMPQYISLSGVMTNIASFEIRDQYITALNHLVLSLELPEV  
KGMGRFGYVPYVGYKCIHVSISSCNGVIWEEGELYNINCINNTIALKHSYGSSSELNDISIGLTPNDTIK  
EPSTVYVYIKTPFDVEDTFSSKLSDSKITVTVTFNPSVDIVIRDSSFDFTFNKEFVYVPELSFIGYMV  
KNVQIKPSFIEKPRRIGQINQPTATVTEVHAATSLSVYTKPYYGNKFISYPGYSQDEKDYIDAYVSRLL  
DDLIVISDGPPTGYPESAIEVEVEPEGIVSIQDADVYVKIDNVPDNMSVYLHTNLLMFGTRKNSFIYNIK  
KFSITGTYSDATKRTIFAHISHSINIIDTSIPVSLWTSQRNVYNGDNRSAESKAKDLFINDPFIKIDFK  
NKTDIISRLEVRFGNDVLYSENGPISRIYNELLTKSNNGTRTLTFNFTPIFFRPTTITANVSRGKDKLSV  
RVVYSTMDVNHPIYVYVQQLVVCNDLYKVSYDQGVSITKIMGIGNDVI FVLKTI GVP SARQNE DPRFVE  
AFKCELEERYIENPECTLFESLRDEEYSIVRIFMDVDLDACLDEIDYLTAIQDFIIEVSNCAFAFECG  
AIHENVIKMRSNFSLTSTNRDKTSFHIIFLDYTTMDTLIAMKRTLLELSRSENPLTRSIDTAVYRRK  
TTLRVVGRKPNPCDTIHMOPPHDNIEDYLFTYVDMNNNSYFSLQREDVPLWEPGFISFDAIKRVSKI  
FNSIINFNDLNNFTTVPLVIDYVTPCALCKKRSHKHPQLSLENGIRIYKTGNPHSCKVKIVLDGNKLF  
NIAQRILDNTSVLLTERGDHIVWINSWKFNSEEPLITKLILSIRHQLPKEYSELLCPRKRKTVEANIRD  
MLVDSVETDTPDKLPFKNGVLDLDGMFYSGDDAKKYCTVSTGFKFD DTKV--

ESPEMEELMIINDIQPTDENKKNRELYEKLSSCLCGATKGCLTFFFGETATGKSTTKRLLKSAIGDLFV  
ETGQTILTDVLDKGNPFIANMHLKRSVFCSELACSGSKIRSDNIKKLTEPCVIGRPCFSNKINNRNHA  
TIIIDTNYKPVFDRIDNALMRRIAVVRFRTHFSPSGRAENNDAYDKVKLLDEGLDGKIQNNRYRFAFLYL  
LVKWKYRKYHVPKLYPTPEIPDFAFYLKIGTLLVSSSVKHIPMTDLSKKG YILDNVVLP LTFQQKISKYF  
NSRLF GHDIESFIRHKKFNVSD EYLQYIFIEDISSPMNTIIDLFDNHVDSIPTILPHQLATLDYLVRTII  
DENRSVLLFHIMGSGKTIALLFALVASRFKKVYILVFNINILKIFNYNMGVAMNLFNDEFIAENIFIHS  
TTSFYSLNYNDNVINYGLSRYNNSIFIVDEAHNIFGNNTGELMTVIKKNKIPFLLLSGSPITNTPNTL  
GHIIDLMSEETIDFGEIISRGGKVIQTLNERNVNLKDLLKGRISYEMPDKDLPTIRYHGRKFLDTRV  
VYCHMSKLQERDYMITRQLCYHEMFDKNMYNVSMVAVLGQLNLMNLDTLQEQDKELYPNLKINNGVLYGE  
ELVTLNISSKFKYFINRITLNGKHFIYFSNSTYGGVLVIKYIMLSNGYSEYNGSQGTNPHMINGKPKTFAI  
VTSKMKSLEDLLDVYNSPDDGSQMLFSSNIMSESYTLKEVRHIWFMTIPDTFSQYNQILGRSIRKF  
SYADISEPVNVYLLAAVYSDFNDEVTSLNDYTQDEINVLPFDIKLLYLKFKTKETNRIYSILQEMSEYS  
LPPHPSIVKVLLGELVRQFFYNNSRIKYNSKLLKMVTVIKNEDARNYIDDIVNGHFFVSNKVFDKSLLY  
KYENDIITVPFRLSYEPFVWGVNFRKEYNVVMDVRCINWFESHGENRFLYLKSRCRNGETVFIRFPHYFY  
YVVTDEIYQSLSPPPARLGKMRITIDIDEISYNLDIRKCVADMWLI EPKKRSIQNTMDEF LNISWFIYSNG  
ISPDGCYSLDQLTKINNGCYHCDDPRCFAKKIPRFDIPRSYFLDIECHFDDKFPVFINPISHTSYCYI  
DLGKRLFTLINEEMLTEEQEADRGCRISLEMDYERELVLCSEIVLLRIAKQLELTFDYVVTFNHGNFD  
LRYITNRLELLTEKIFRSPDKKEAVHLCIYERNQGGMANTTFHVNNNGTIFFDLYSFIQKSEKLD SYKL  
DSISKNAFSCMGKVNVRGVRMTFGDDAKGAAAFKVLTTGNYVTVDEDIKVIKDIWENGFKVLLC-

PTLP-

NDTYKLSFGKDDVDLAQMYKDYNLNIALDMARYCIHDAACLQYLWEYYGVETKTDAGASTYVLPQSMVFE  
YRASTVIKGPLLKLLETKTILVRSETKKPYEGGKVFAPKQKMF SNNVLI FDYNSLYPNVICFGNLSPET

LVGVVVSTNRLEEEINNQLLLQKYPPRYITVHCEPRLPNISEIAIFDRSIEGTIPRLLRTFLAERARYK  
KMLKQATSTEKAIYDSMQYTYKIVANSVYGLMGFRNSALYSYASAKSCTSIGRRMILYLESVLNGAELSN  
GMLFANLNPFYMDNPIVKTSLPIDYRFFRSVYGDTSVFTSIDSQDVDSIEIAKELERLINNRVLFNNFK  
IEFEAVYKNLIMQSKKKYTTMKYSASSSKSPERINKGTSETRRDVSKFHKNMIKTYKTRLSEMLSEGRNS  
NQVCIDILRSLETDLREFDSRSSPLEFMLSRMHHSNYKSADNPMLVTEYNKNNPETIELGERYYFAYIC  
PANPWTKKLVNIKTYETIIDRSFKLGSDRIFYEVYFKRLTSEIVNLLDNKVLCSFFERMFGSKPTFYE-  
MLLKMEYNLYAELKKMTCGQPLSLFNEDGDFVEVEPGSSFKFLIPKGFYASPSVSLVFLTTTNDNITSINN  
APKLYPQRKVVSEVNMRRKMESKRPLYITLHLACGFGKTITTCYLMATHGRKTVICVFNKMLIQWKTQVEA  
VGLEHKISIDGVSSLLKELKTQSPDVLIVVSRHLTNDAFCKYINKHYDLFILDESHTYNLMNNTAVTRFL  
AYYPPMCMCYFLTATPRANRIYCNSIINIAKLSDLKKTIVAVDSFFEPYSTDNIRHVMVKRLDPSNKYHIYT  
EKLLSVDPRNQLILNTLEFKSGTINRILVITKLRHEMVYKRLDLDFGPEVVFIGDAQNRRTPDMMVKS  
ELNRFIFVSTLYSGTGLDIPSLDSLFCISAVINMQIEQLLGRVCRETELDRVYVFPSTSIKEIKYMIG  
NFMQRIISLSVDKLGFKQESRFQEKQFSRENLLKPFMVLTTGGSGSGKTIYLLSLFSTLVKKYKHIFLFT  
PVYNPDYDGYIWPNHINFVSSSELEYNLITKSNIEKCAAQNHKKFLLIFDDVGDKLSKCNLTIEFLNFG  
RHLNTSIIILLCQTYRHVPILGRANITHFCFNISISDAENMLRSMPVKKRKDILNMLNMIQRNRLAIII  
EDSELRICTDTADKDVIEQLNDILVNQYSHMKKNLAILESMYIVSPQLVLQVGGKQEVERALYLTPYDYI  
DEKSPIYYFLRSHLNIQQPEIVKRHILLTLRMTQLKGYLGNLLDIKDDIIIIYSHKNNLEYSYVDNTIFNP  
FVYTQKKTLLKNSDFLYNVYPGACDFLVIWVARACDTSIPEFGSYEDVDNIIKFETMLMEVFPQLDLDI  
TVESKFNNIFRTNLKTGLKKIIQRVQDLIDINYKLLSRYDEHFIMTGNHFILNDELNLSIWDLDGTLALSS  
DGDTVMINNVKLFDTLVSDDTQMERIKGDITYKVHLATPINSRIKLDIETSFIETATNNILLSSDKKI  
SIIAKNHISIKVKNHIPPNEIKYFTFLVIAINAMFNSVQKSADFTKVETVYWSRICQNTKNKNRKP  
IINYLDPGMKKISNNFYKSDEKEVFINDNGIMFTCDPLGKYNKVGFLNIFHDMRKYCIPCCFLHDQSHRSTFS  
SCVHQIDVEKKVSPYILNFGKVVTESKMSFLPIIFDAFLNDGMTANMEQDNKRLKETSQYHIVRCCAGDI  
VRLRTTSDIIQFVNEDKNILIVNDMVYFPMNASDIGKIHILIQEIVHEVMVKKKESDIDFPNYKLLKD  
LFPKTITPIQSDAGMVLTTDGFYIDGKLFNEDLSSKYVFTTKNVIASDAVAKYFSPKFKYVISEADR  
FIK TWMINIMIN-----

VDPNNIIPLEKYPPSRMNLRCSGCRHNGIVSEQGYEYICFCEVSFQKCTKVKSNFHVSNKLIHLRNVLR  
RLLSHQCSGEIISELLDIMEKNQISTDDVDANFVSSFLKANERINYKLVFEIINQVKDEKLNLSTEKINE  
VVEIFKHLVFFCQENTPSKTINYSFFLDKIFDITSVTKNLKPQTVKNYTKNNSNQLWENFLAHRMSKRV  
TVDYGHEYVVFDEFSTCSLEVEKNLPDIFFFPNCVNVFSYKYSQDEFNSMSKTERFSLAVFPVIKRW  
HNAHVVKHKGIIYKVSTERGKVSPPSLGPINTKQYIYSEHT-  
ISFECYSFLKCIINTEINSFDEYILRGLLEAGNSLQIFSNSGRTDTIGVLGNYPFKIPLASLTPKAQREIF  
SAWISHRPVVLTTGGTGVGKTSQVPKLLLWFNYLFGGFSTLDIT-  
NFHERPVILSLPRIALVRLHSNTILKSLGFKVLDGSPISLRYGSIPEELINKQPKKYGIVFSTHKLSTK  
LFSYGLTIIDEVHEHDQIGDIIIAVARKHTKIDSMFLMTATLEDDRERLKVFLPNPAFIHIPGDTLTKIS  
EVFIHNKNSRAYIEEEKRNLVTAIQYTPPGSSGIVFVASVAQCHEYKSYLEKRLPYDMYIIHGKVL  
DID EILEKVYSSPNVSIISTPYLESSVTIRNVTHIYDMGKVFVPAPFGGSQEFISKSMRDQRKGRVGRV  
NPG TYVYFYDLYMKSIIQRIDSEFLHNYILYANKFNLTLPEDLFIIPTNLDILWRTKEYIDSFDISTET  
WNKLL SNYYMKMIEYAKLYVLSPIAELDNFERTGELTSIVREAILSLNLRILNFKHKDDYIHFCKILFGV  
YNG TNATIYHRPLTGYMNMISDTIFVPDMDQRLGYKFLVPDPKGVFYRPLHFQYVSYSNFILHRLHEIL  
TVKR PLLSFKNNTERIMIEISNVKVTTPDYSPIIASIKGKSYDALATFTVNIKFEVMTKEGISITKISSY  
EGKD SHLIKIPELLIGYGNKNPLDTAKYLVPNVIGGVFINKQSVKVGINLVEKITTWPKFRVVKPNSFT  
FSFS VSPPNVLPTRYRHYKISLDISQLELNISSTKTFITVNIVLLSQYLSRVSLFIRRSLSYDMPPEV  
VYLVN AIIDS AKRITESTDFNIDTYINDLVEAEHIKQKSQLTINEFKYEMLHNFLPHMYTPDQLKGFY  
MISLLRK FLYCIYHTSRYPDRDSMVCHRILTYGKYFETLAHDELENYIGNIRNDIMNNHKNRGT  
YAVNIHVLTTPGL NHA FSSLLSGKFKKSDGSYRTHPHYSWMQNISIPRSVGFYDPQVKISKMF  
SVRKYHPSQYLYFCSSDVPE RGPQVGLVLSVLSSITNILTSEYLDLEKKICEYIRSYYKDDISYFET  
GFIT IENALVASLNPNMICDF VDFRRRKRGGFGNLEVGITLVRDHMNEIRINIGAGRLVRPFLVVDN  
GELMMDVC-  
PELESRLDDMTFSDIQKEFPHVIEVMDIEQFTFSNVCESVQKFRMMSKDERKQYDLCDFPAEFRDGY  
VAS SLVGINHNHSGPRAILGCAQAKQAISCLSSDIRNKIDNGIHLMPERPIVISKALETS  
KIANCFGQHVITIA

LMSYKGINQEDGIIKKQFIQRGGLDIVTAKKHQVEIPLNFNNKERDRSNAYSKLESNGLVRLNAFLES  
GDAMARNISSRTLEDRDNQISFDVSEKYTDMYKSRVERVQVELTDKVKVRVLTMKERRPILGDKFTTRTS  
QKGTVAYVADELTPYDENGITPDVIINSTSIFSRKTISMLIEVILTAAYSAPYNNKGENRPVCFPSSN  
ETSIDTYMQFAKQCYEHSNPKLSDEELSDKIFCEKILYDPETDKPYASKVFFGPIYYLRLRHLTQDKATV  
RCRGKKTCLRQANEGRKRGGGKIFGEMERDCLIAHGAANTITEVLKDSEEDYQDVVVCENCEDIAAQIK  
GINTCLRCSKLNLSPLTKIDTTHVSKVFLTQMNARGVKVKLDFERRPPSFYKPLDKMAVISKVTYSLYDQ  
KEINATDIIISHVKNDDDIGTVKDGRLGAMDGALCKTCGKTELECFHGWGKVSIIYKTHIVKPEFISEIIR  
LLNHICIHCGLLRSREPYSDDINELSHLRRLKDKILSKKSCWNSECMQPYQKITFSKKKVCVFNKLDV  
PNSLIYQKLISIEHKFWLLEIHQYPANLFYTDYFPIPLIIRPAISFWIDSIPKETNELTYLLGMIVKN  
CNLNADEQVIQKAVIEYDDIKIISNNTSSINLSYITSGKNMIRSIVARRKDQTARSVIGPSTSITVNE  
VGMPAYIRNTLTEKIFVNAFTVDKVKQLLSNQVKFYFNKRLNQLTRIRQKGFKNKIHLPGDWVEVAVQ  
EYTSIIFGRQPSLHRYNVIASSIRATEGDTIKISPGIANSQNADFDGDEEWMILEQNPKAVIEQSILMYP  
TTLLKHDIHGAPVYGSIQDEIVAAYSLFRQDLCLEVLNILGKYGREFDPKGKCKFSGKDIYTYLIGEKI  
NYPGLLKDGEIANDVDSNFVAMRHSAGLLSDHKSNEGINFIIKSSYVFKRYLSIYGFGVTFKDLPN  
STFTNKLEAINEKIELIKEAYAKYLNDVRDGKIVPLSKALEADYVESMLSNTLNIREIEEHMRQTLID  
DPDNNLLKMAKAGYKVNPTELMYILGTYGQQRIDGEPATRVLGRVLPYYLPDSKDPREGYILNSLTGK  
LTGSQYYFMSLVARSQSTDIVCETSRTGTLARKIIKKMEDMVVDGYGQVIGNTLIKYAANYTKILGSVC  
KPVDLIYPDESMTWYLEISALWNKIKQGFVYSQKQKLAKKTLAPFNFLVFKPTEDNAIKVKDLYDMIHN  
VIDDVREKYFFTVSNIIDFMEYIFLTHLNPSRIRITKETAITIFEKFEKLNNTLGGGTPIGIISAQVLSE  
KFTQALSSFHTTEKSGAVKKLGFNEFNLTNLSKNKTEIITLVSDDKLQSVKINFEFVCLGELNPDITL  
RK-

ETDRYVVDIVNRLYIKRAEITELVVEYMIERFISFSVIVKEWGMETFIEDEDNIRFTVLNFVEPEELNLS  
KFMMVPGAANKGKISKFKIPIDYTYDDFNQTKKNKMTVELMNLKELGSFDLENNVPGVWNTYDIFGIE  
AAREYLCEAMLNTYGEFDYLYQPCDLLASLLCASYEPESVNKFKAFASTLKRATFGDNKALLNAALHK  
KSEPINDNSSCHFFSKVPNIGTGYKYFIDLGLLRKLSKISSQKIKEMEE-

EDFSSTIATYIDALAKNASELTAYEINNELELVFIKPLITLTVNVIISTIQESFIRFTVTNKEGVKIRT  
KIPLSKVHGLDVKNVQLVDAIDNIVWEKSLVTENRLHKCLLRLSTEERHIFLDYKKGSSIRLELVNIQ  
AKTKNFTIDFKLYFLGSGAQSKSLLHAINHPKSRPNTSLEIEFTRETVPYDELKELTTLSRHIFMAS  
PENVILSPINAPIKTFMLPKQDIGLDLENLYAVTKTDGIIIRVTSNGLYCYFTHLGYIIRYPVKRIIDSE  
VVFGEAVKKN---

WTVYLKLIIEPAINDRLEEKYVESKLVDICDRIVFKKKYEGPFTTTSEVVDMLSTYLPKQPEGVILFYSK  
GPKSNDFKIKKENTIDQTANVVFYSEPIIFGESSIFVEYKFKSNDKGFKEYKIVLYNGVNYLNNIYCL  
EYINTHNEVGKISVVVPIKFAEFLVNGEILKPRIDKTMKYINSDYYGNQHNIIVEHLRQDSIKIGDIFN  
EDKLSDVGHQANDKFRNLNPEVSYFTNKRTGRLGILSNYVKTLLISMYCSKTFLLDSNKRKVLAIIDFGNG  
ADLEKYFYGEIALVATDPDADAIARGNERYNKLNSGIKTKYKFDYIQUETIRSDFVSSVREVFYFGKFN  
IIDWQFAIHYSFHPRHYATVMNNLSELASGGKVLITTMGDGKLSKLTDKKTFIHKNPSSSENYMSVEKI  
ADDRIVVYNPSTMSTPMTEYIIKKNDIVRVFNEYGFVLVDNVDFAIIERSKKFIGASTMEDRPSTRNFF  
ELNRGAIKCEGLDVEDLLSYVVVYVFSKRKRVS LDPVVISAPKAVFKPKEEALACILPKYYKSMADVSIT  
NSVIDKCFWFCNQLVPIISIEFTFKGGVGYFCSKICRDSLASMVKSVALREPKISLLPLVFYEDKEKVINT  
INLRDKDGVYGYSCYFKENSIIDISLRSL

>Yabdi

MNNTVISLIGNDDSVKRHNVFGVDCHTPTLYMPQYITLTGVVSNVSTFEIRDQYITALSHFVLSLDLPEV  
KGIGKFGYVYPYGYKAIQHISVSSNNGILWETGEDLFISCRDNDTALKHSGFSHELNDVSTGLSPNDTIK  
ESTTVYIYIKTPFDEEKTFFSSLKLSDSKIVVSVTFNSVSDIIRDSSTFNJETVKEFVYVSELSFIGYMV  
KNIQTKQSYIEKPRRILGQLNQSTAVISEVYAVTSLSVYVKPFYGNKFIYPGYLQSERDYICAFVERLL  
EDMVIIVSHSLPKFFPDSAEIIEVPPGIVTIQDAEVFVKIDNVPCDMKVYFHTNILVFGTRKNSFVYNIK  
KFSITGSYSDSTKRIMFSHSHSINITDVSIPVSLWTCQRNVYNGDNRSECSKSKDLFINDPFIKIDFK  
NKTDIISRMEVRFVGNVLYSETGPISNIYNDLLNVCVGGTRTLKFNFTPTFFKPTTIVANPSRGKDKLSV  
RVVSSFDPNPIIYVSKQLVLCNDLYKITHDNGVNVSKITGINNEHVFLKSIGVPSRQSEDPRFVD  
IFTCEELSYIEKNPTCTLFETLRDEEYSVVRVFFVDVLDVAVLDEIDYIAALEDFILEITNFVSFSVECG

ANQNTVLKMRNSFSLTKSSNKNKTSFHMI FPDYTTINTLIAMKKPLLEFLRSENPLIRSIDPAVYRRK  
ATLRIVGTRKISNND SIHKQPPHDNISDYLF TYVKFHNNSCYFSLKREDLPSLWEPNYIPFEAIKKVSKI  
INDIINLKDLDNNFTTIPLVIDYVMPCALCKKKSHKHHHQLSLGNGIKIYKAGNPHSCKVKAILEGNKLF  
TISQLIMDANVIRLTERGDHIVWIKNSWKFNN EEPVITKLVLMKDQLPSEYTDILCPRKRKVIENNLKD  
MLVDTVETDTPHILPFGKNGVLDISGKFYHG EESKFFICTASTDFNFEMDKL-  
NDSIEMKELEI IDDIQPTCENLKNRELYERTLSSCLCGSTKQCITFFFGETATGKSTTKRLLQSAIGDLF  
IETGQTILTDLMDKGNPFI SNMHLKRSVFCSELACSGSKKIRADNVKKLTEPCIVGRSCFSNKINNRNH  
ASIIIDTNYKPIFDRVDCALMRRVSLVKFRTHFSPSSAAKSNSAYDDVKPLDENLDMKIQKKYYRFAFLN  
MLVKWYQKYHVPMLFPTPDVPDFAFQLKVSSII VASSSTHLSISKLSKIGYVINDLILPSNFQQKLAGH  
FNIKIHGHDIESFIRHKKFNVSE EYLEYIFIEDITSKMNLIVDLFNGHINNIPNILPHQLATLDYLVRSI  
IDENKSVLLFHIMGSGKTI IALLFALVASRFKKVYILV PNINILKIFNYSMDVAVNLFNSEYVLENIFIH  
STTSFYSLNYNDNVINYNGLSRYNNAIFIIDEAHNIFGNNTGELMTVIKNKNKIPFLLLSGSPITNT PIT  
LSNIIISLMSDENINFGDIIIQGGKVFQILLNENGVKVLKSILKGRISYYEMPSTDLPKIHYHGKKFLDTK  
VYCHMSKLQEKDYNVRKLCNNEMFEKNMNVSLAVLGQLNFINNLDILQE QDKELYPNLKISNGILYG  
DELTTLNISSEKFKYFIGKISLTGKQFIYFSNSTYGLI IKYIMLSNGYSEYNGSQGTNPKIINGKPKTFA  
IVTSKMKSSLEDLLNVYNSQNE DGSQIMFLFSSNIMSESYTLKEVRNIWFMTIPD TFSQYNQILGRSIRK  
FSYLDINKP VNVYLLATVYSDFNDDITSLEDYSLDEINTLPFDIKKLLYLKFKTKETNRIYSILQSISDY  
RMPHPHYIVEIVLGEIVRQFFYHHSRISFNSKELINAIQVLPNDLAKKYINEIVNGHFFVSNKIFDKSLL  
YKHNDDIVTVPFKLSHEPFVWGVNFRKEYNVIMDVKINWFESKGDNRYLFLKARNKELETFFIRFPYYF  
YYALTDDVYKSLTPPASVIGKMTNIDISEISYVVSERKKDVMWLIEPKKRIIANIMNDFL NITWFYILN  
KICPDGCYSMDKLEKINDNCYHCDEPQLFLNAISKFDVLRSYLFLDIECHFEEKFPSVFTNPVSHVSCCY  
INLGKEKFTLINKDMLSEDSKAELGYEINSTEMDYSKEFVFCSEITLLKISKKLELSFDFVVT FNGHNF  
DLRYISNRLELLTGKIFKSPDKKETVHMC IYERNLGGVSNTTYHVNNNGTIFFDLYSFIQKSEKLD SYK  
LDSISKNAFSCNAKIFVENSYTFGNDVKGK SLLFSKVLSTGNYITINDEVYKILKKEYDDEFTVTIKCN  
KNLDIDNVYCLSGKDDVNLSDMYANYNLQISLEMGKYCIHDA CLCKYLWDYYGVEKKT DAGASTYILPQ  
SMVFEYRASTLIKGPLLSLLETKITL TRTEKKKPYEGGKVFAPKQKMFINNVLIFDYN SLYPNVICFGN  
LSPETLVGVFVSNKLEAEINKQELIKYPPPRYISINCEPRSPDVSEIAVFDRDIEGTIPKLLKKFLAE  
RARYKLLKESSTEKAIYDSMQYTYKIVANSVYGLMGFRNSVLYSYASAKTCTAIGRMMIVYLN SVLNG  
SSVSFKKFFAEPNPF FEDTSTTDIDVNEKYNFFRSVYGD TDSVFLEMNTQDVDSIKIAKELEKIINQV L  
FCNFRIEFEAVYKNLIMQSKKYTTLKYSNSGKSPERVNKGTSETRRDVSRFHKEMIKTYKTRILNMLS  
DGSTSIQVCVDVLKSL ENDLKEFELKSAPLEFLLSRTHHCNYKSHDNPMLVNEYNKNNPETIEIGERYF  
FAYICPAEPWQKKLINIKTYEKI IDRGFKLKQTRIFYEVYFKRIATEVVNLLDNKVLSSFFERMFGSKPI  
FYSMSCTEIDYKLYTELKKIAG-  
NSLFLFNENGDFTEVVLNSSF KFLVPIGFFSSIDIPLK KYKNNNNIEH SKILPNLYPQKHVSEVSM EKK  
KHKRPTYITLHLACGFGTITSCYLLSLHKKKAVICLPNKMLIQWKRAIESINMDHIVSVDGVS NLLKEM  
VKKTADILIIVSRHLLNEEFCKKIYLN YDIFILDESHMYNLMNNSAVTKFLTYPPKVCYFLTATPRVNR  
IYCNDIINVSNSLELKKYIKIVEFFFETYSSDTIKQMVKLLNNYNKYHMYTEKILAEDPRNELILD TIYF  
NKMLINRLIIVTKLRKHMMFYDRLSEKFGLDVVYLGDAKNKNISDIVKKIKSIDRFIFISTTYS GTGLDV  
PTLDSLVICSAVMNSMQIEQILGRICRSSVSKTRTVIVFPTS IKEIKHMVGFFTKIITLAIEKLNFKKI  
EKFKKHF SRKSLLKPFRLALVGGSGSKTAYLLS LFNLTVEQYRHIFLFTPVYNSEYDSYIWPDHVNRV  
STEELDYALITKQKIEKYVKRGNKNAFL LILDDMGDKQIKSSCLLDFLNHGRHLNTS IILLCQTYKHVPV  
NGRTSITHFCCCNVSDSDIENMLRSMSITSKKDLLKCVSLLRSHKRRVIIIEDSEQRVCYDTADDNVIQN  
VNSILLKQF SHMKKLSILSTMYIISPQLVIYVGGQEI KRALYLPYGVLDKSSIIYFLKTHLNIHNP  
EIHKRHILLTKIHQVKGYLLNLLNINDDIIYSHKNNLEFSYVDNTIFNPFTNTQRKTLIRSDGFLYNI  
YPGACDFLVIWANSKDTSMIEFGSYEEVDN MILKFENHLLLEVSSLDLEMTIESKFNNIFRTNLKTGLK  
TIIKKINKLDTSYKILYKSDEYFIITGNHFILTDELNLSVWSDNCLAFSSDGD TIVINNVLKFTELVSD  
STQMERIKGDVYKVF LSTPITSRIKLDIETS FIFVETATNNILLSADKKISII LAKNHISIKVKNYIPN  
IEKYFTFLVVA INSMFNSVQKSSDFTK VETVYWSRICQNTNKNRKPVIVSSLEDMDKKISNSFYKSEKL  
EVFINTNGVMFSCDPMGKYNSIGFLSIFYKLQKMCIPCCFLKDQSHDTDFSSCVHNKDVSNDISPYILNF  
GKVVTTSKISFLPIIFD TFLNEGLKISFEQDNKRLKETTGYHVVKSCNGEII RLRTTSDIIDFVNKESTI

LIADDIIYFPMNYISIGKVYILIQEIVHEVVVKNINKDILTPPNINILKELFPKTTLTIRSDSGMELTT  
DGFLIDGVKFDKELSSKFVTFKNVTTSDFISKYFSPLFKYAITESERFIKTWIIINIMLFG--  
TDIESSVIIPLEKYYPHKMNLKCSGCSHNGIVSENGYEFICFCDAVFQKCSKIKRSNFHVSNKLIHLRNV  
LRRLLSNQCSGEIIEIILLMKNQISTDDVDANFVSSFLKAHEKINYKLVFEIINHVKDEKLNLTTEKI  
NEVVEIFKHLVFFCQENTPSKTINYSFFLDKIFDITFVTKNLKPQTVKNYTKNNSNQLWENFLDHMKKK  
RASIDFGHDYVFNNEFVSCSLEVDNHLPEIFYFPNCVDIFSHQYSQIEFNKMEKTTKFSLAVFPIIKHRW  
KKSFIVIDNGIFKLNLEENNNKIKKNIPIDQKIYTVGN-  
LKITFECYSYLMCKIKDINLFNEYILRGLIEGNALKIFSKKGVNSSIGIFGNSSFKIPLTSLKPLSQQK  
IFNAWLSNKPVILTGGTGVGKTSQVPKLLLWFNYLFGGFKNLNIN-  
NFHERQIVLSLPRVTLVKLHSKTLLSSIGFKQINDSPIKFGSMPDNLINTNPKPYGLVFSTHKLTLK  
LFDYGTIIIDEVHEHDQIGDIIISVLNKNMNFSLFLMTATLEDDRERINDFFTNPLFIHIPGGTLYNIS  
EIIYIKNTSLNKEYIEEEKNILNAIKYTPLKFSGIVFVSSVSQCEEYKKYLSQKLPYDFYIIHGKVLNID  
DMLKNIYSSKNVSIISTPYLESSVTIYNVTHIYDTGRVYIPAPFGGKEMFISKSMMEQRKGRVGRVRPG  
LYIYFYDVCLPKPIKKIDFEFLHNYVLYAKYYNLTLPNDLFIIPNNLDNIKKTEEYIDSFNIPISKWMIYL  
SNYYLRILEYAKIYIKGGISKLDLFEKENIINNVDVSIKSLNMRAKVL SFKKKNYVLTCEIMFGVYLG  
KKFNLYRKPLTGFILMITECNFIPYMDQIIGYKFLAPDPKGVFYRPLHFQYVSYSNFINHRLQEILSVKR  
TLLSFKNDTEKIMIEIDNIKVTPPEYSPIIASIKGKSYDALVTFVNIYKEVMTKDGTITITKISSYEGND  
SHLIKIPLLIGYGNKNPLDTAKYVVPNVIGGVFINKQSVEKIGINLVEKITTWPKFRVIKPNFTFSFSS  
VSPSYVLPKYRHYKIIMDISQLDCSISSTKTFITVNIILLVQYLSRVSLDFIKKSLSYDMPSEIYYLVN  
SLIESTKELIKDSDFNLDNYINDLVSEYTKQKSQLQYEEFKYEMINFLPHMDSPNQLKGFYIILLLRK  
FIYCIYFTRSRYPDRDSMVCHRVLTYGKYFEILAHDELENYIGNIKTDIINNHKNRGTYSVNIHVLTPPGF  
NHAFSGLLSGKFKKTDGSYRTHPHYSWMQNISIPRSVGYYPDQVKISKMFVSRKYHPSQYAYFCPSDVPE  
RGPQVGLVSQLSVLTSITNICTNEYLELEKKIYSYIKSFNYEDISYFETGYITLENSLVLASLNPEKVYDF  
VNDFRRKKRGYFGNLEIGITLVQDHMNEIRINIGGRLIRPFLVIDNGELVMDTVIKDLEEKIEDFTFS  
ILKEFPHVEMVDIEQFTFSNVCESVQKFKSLSKAERVKYHLCDFPSEFRDGYVASSLVGINHNSGPRAI  
LGCAQAKQAISSDIRNKIDNGIHLIYPERPIVLSKALETSKIANCFGQHVIIALMSYKGINQEDGII  
IKKQFVERGGDIITAKKHQVEIPLNFNNKERVKSTAYSKLDSNGLVKLNAFLENGDAIARNISSKLE  
DNDNQISFDISERYTDMYKSRVERVQVDLTDKVKVRVLTMKERRPILGDKFTSRTSQKGTVAFIADETDL  
PYDDEGIKPDIIINSTSIFSRKTLMLVEVILTAAYASKPYNNNEQNRPICFPSSNETSIDTYLDFAKQC  
YECVYPNLDKDEIDNKVFCEKILYDPETDVPYKSKVFMGPIYYLRRLRHLTQDKATVRCRGKTKLIRQAN  
EGRRRGGGIKFGEMERDCLIAHGAANTITEVLKDSEEDYQEVVVCENCGDITSSVKGNKICIRCSKQNL  
TLTKVDTTTHVSKVFITQMNARGVKVKMEFEKRDPMFYKPLESMAVISKVTYSLYNQEEINATDVLINHVK  
NDDDIGTVKDGRLGAMDGALCKTCEKTELQCFGHGKVRLEYETHIVKPEYIGEVVRLNHICIRCGFLRS  
REPYMEDVTKLSHLKRLKDRILSKKSKCWNKCMQPYQKITFSKVKCFINKSDEVPNALIYQKITSIYK  
RFWPLLEIYQNPENLFYKNFFPVPPLIIRPAISFWIDSIPKETNELTYLLGMIVKYCNMNAEEQVIQKAV  
IEYDDIKIISNNTTSINLSYITSGKNNMIRSIVARRKQDARSVIGPDTSLTINEVGVPEYIRNTLTK  
IFVNPFTSKYVKKL FNNEIKFYFNKRLNQLTRIKPGKFIKNKIHMLPGDWVEVSLRENSIIIFGRQPSLH  
RYNVIASTVKYTEGDTIKIPPGIANSQNAFDGDEEWMILEQNPKAIIEQSILMYPTLLKHDIHGAPVY  
GSIQDEIVAAYS LFKENLTLNEVMNILGKYGLNFNANGKLFSGKDIYSYLINDNVNYPNVLNNGNIIAS  
DVSSDFVAMRHS LAGLISDYKSNVEGVNFIKSSYVFKRFLIYGFVTFRDL PNSDFTNKLEAINEKI  
ELIKDAYTKYLNDIEKNKILPLSKSTEMDAVETMLSNLTNLNIKEIEEYMQKTLQENPHNLLKMAKSGY  
KVNPTELMYILGTYGQQRIDGPAETKVLGRVLPYFPNSKDPEGRGYILNSLTQGLTGSQYYFSMLVAR  
SQSTDIVCETSRTGTLARKI IKKMEDMVVDGYGQVYGNILLKYSANYTKILASICKPVELIFPHESMTW  
FLEISALWEKIKGFIYSQRQKIIKKTLPFNFLVFIEEDKNNSIGAKKLYDMIQNVLEDVKEKYFFTIT  
NIDFIEYVFLTHLNPTRVKISTNTAINIFKKFYEKLNYSLGGGTPIGIISAQVLEKFTQALSSFHTTE  
KSGAVKLG FNEFNLTNLSKNKTEIITLISDDKLQNVKINFVCLGELNPIINLGK-  
DKDVFIIIDIVNRVYIKRAELTELVEYMIERFISFVLVKEWGLETNIHDEYNIKYTISKFVEPEELNLN  
KFMMVLLGAVNKGKISKFKIPIDYVYEDFNKTKKYKMTVELMNLKELGTFDLEDVNVVTGIWNTYDIFGIE  
SARGYLCEALLNTYGEFDYLYQPCDLLSSLICMSYEPESVNKFKFGSATALKATFGDNKALLNAALHK  
KSEHVNDNSSCHFFSKVPKIGTGYRYFVNLELLKLSKIAKQKVEMLTEVEDFLKSLLDYIKKLICVFK

TIPTEDVNNEVELIFIQPLITLGNLLNISSVQESFIMFTVNKGKVKIRTKVPLSKVHGLDIKNIQLVD  
SVDNIIWEKKTLYEDVINDCLIRHSTEEKHVFLDYKKEYISSIKLELVNIQTRIKHIQVDFKLKYFLGSG  
AQAKSSLLHVLNHPKSKPTPSLEFEIVTIKIDENELLNEMYTLFRSIFMNLPENVFLVPFKNPLKTYMLK  
KQDIGLHLENLYATTKTDGITVKIKQNEIYCHFSHINYCIKYLANRTIENEILYGEALKKG--  
KWSIYLIKLMKPKLENRIKEDFVDENLKEISEKIIFFKKYEGPFSSHSEIIDLLTFYLPVQKEGVILFYI  
EGKNSNDYKIKNDNTTDHMINVVYRYSEPVIIFGDSNTFIEFKKFSDEKGFPKDFKIILTESIKYLNNIYC  
LEFSNVYEDVGIIKVVVPVKFISEFSSKGCLLKPRIDKTMKYMSDYGNQYNIIVMDHIMDQNIKIEDIF  
NEEKLSDIGKNADDKYRLNPEVSYFTNKTRGPLGILSNYIKTLLISLYCSKTFLDNSNKKKVLAIIDFGN  
GADLEKYFYGEISLVATDPDSKAIERCNERYTKLNSGIKSKYKFNFIQETIRSSSYVSSVREVVFFGKF  
DIIDWQFAIHYSFHKKHYSTIMKNLTELASGGKVLITTMGDGKLYNLKDKKTFIHKSPSENYSVEK  
INSEQILVYNPSSMSKPMEEYIVKKLDIVRIFSEYGFELIDNVNFDTVINRSKKFICVSKMEERQSTKNF  
FELNREALKFDVLDVEELLSYVVVYVFSKRKKVSLPNIVISSPKSVVKPRDEEISCILPKYYYKSVADVTL  
LNANTDYCWFCYQNLIPYFVETLKGVGAFCSNICRDSFSSMIRTVAIREEPKITLLPLVFKDPEKVVN  
IINLKNKEGVYGSFCYKENDSIQISLRSL

>Amsmo

MKRTFI--

PFSKIDS DRPNIIYITETKNGKYNIPQYVSSPCTFQDYAVASITDIKLEGCNFGLNITLPEIKGIGGVRF  
QNYFIPKLIIEECIIETIDNEIIRTGLELMDFIQKKKEYSRFVGNNSDLCKFKYKGCADDIIFPSKEVYFP  
LMFIFDNVNPRTCFRLPETKLQIKIKFRPFADILLPDVKYKKNLSISDVLQPYIKFTGYNTCGSPFKHR  
YIEELTYSTHKSNNKYYSPFLSITNLLWYKSKFRGNMFISYDPYPETEENFIKTYVDKLLKDLLIISD  
DKSKGFSKCKFKKIDDPKIVFDNNCEINIMNVPEGFDLYHTNLSFSRRNNPNDYNISKKFSISGTY  
IPNEDKILIEHVKHTINISDVSIPLSIWANANTSTGDLRSIKSKSDIYVNDPFVFLDFLSKLGIISR  
SITSSNESIIESYFQSDNLFPTSEYSNPAIFLHRFNHNI FIEPSRLIADAANKFRCVNL SIDWKEFP  
EVDPRSLFNKELQICQTIVKKISYDNNIITVHILE--  
SDEYIYLQKSLNVTKEKIDNDKTSKDLVKCRSILKYKDSNQPISEYHEFILD DTDYFKLFFDIDC-----  
KTEYEIDDVKKYIKEFKKFISELYIFNHNIDNIKKIFNNIYYT LSDNPHKLSLHIFFNQILVSPTSFIQL  
KKYIINLRSKINNILINNIDLAPFRNTQLRFIYSKKN--  
DSEYFHEHDYNEDLKKYIITYKNFNPHI I I KADNLTLD--  
VYPPHFIRNSKEITISDSDQLFKKKHSAEDEIIDINLIFNT--  
PDCKICGKSLHKNRRIKIFTEQIILFKSGNPRCNTLKYYP T LSGYELANFIRDLNIKKIDSDAYVYWK  
NGKWAIVDNPYIFQGISNMILEKYRNNQDDYI I KKFGEAKNRISANLMNTDIICFNPIYIIQFNNGVYDL  
ESKFYTGENAKKYIRLNYIKIDYKDIEMDEEIKFENNYNLLKLFNLIPKSNPKRIVFETNLSSVLHYCHK  
SVITILYGP TSGGKSTIKYLLRQLLFDMFLEPPIEFYQNYIPNSPNSWL GKVEDKLVSFASEGDVNRNEV  
FLNKNIKQYTEQYILGRDLNKSCKVHKNTLTQFIDLNPKPMFSSVDPALVKRIAVIEINETQFNEKLDTV  
NITSDNIVIADSTFDDKILNNEFTLPLFYILKKWSKKYHKDVKLLYTPDFDKQN-----

MNKILDDL RNIPNNIAQILPHQLATLDFLYQKCINNANSVLLFHKMGSGKTIISLLFSILICNIKKVIIV  
LPSYSILEMWKQNL YRSLILLNKEYNLQNI EFTTRTDIMLIG--  
TDIINEKLKNYNDYIMIIDEAHNFFGNMTGSVLSTLRKNTNIIYVLLTGSPITNTVSTIKDIVELLTRET  
FDENKYIIGGNRVFEKSINNEGIAFLNKNL KGLISYDEERKDVPEVKYRGKIFLCPLTLCPSK LHEE  
NYEVARNTKNDMFVKLLMSVSLVALGSI SNYENFSQFMETDKKIFDNFYISNGKFSGSELVTLNISSKL  
KTFRDTIKERGRFVYFANSTIGSAIIRSVM LANGISEYGKEIVNFTVCVICKDRFVIITSKNSNYINN  
ILSIFNEDNDDGNNIMFLFGSKIISEAYTLKNVKDIWFLTVPETKSEL DQCVARAVRSFSYKDTNTKVII  
RIIASTTNTLSNDVSKTIEQYKDVISTLSYDFRKQLYSELKFEKSKVADNIFKNLTISSDTIESDVLECF  
VLEKIRRYCYNTRFKFTTEYI IKNID--  
IKYDKIKEYINNAIESSFVIENDIFGNCYLTYFKNDIVTVPIVLEYNNHLLSVRL-----  
INIKIYNWYI I KPSLEQFIVCKCKDEEIIYILFDIYEYFLCDYELSESNTK LKNIDDYKIITNEVIQY  
NYTEKITNNDLVLFTPYKIKIYSYNI FINQYRWFYVLN NIEPSGSYRINDMQIKITTSYCKNPKLFSNY  
VIDKHIPASRVSIDIECQHFGFPTANKFPISHI--  
CWYMDKTNPKITL INYEI IKNVEKKKFIYEVNKLNTNKVYIT IYCTEKYMLHFVLYTLRQDFDYVLTNG



HNFDFTYIQDRRKINKKGLLDNVYSTNEIKISKF-----  
SYNQDTTYEIDSTNGIIFLDLYNYIKKTYSSNSYKLSEITKERFNIFCKIYNNNEIIELNANKNKISIFY  
DVIRTANYCFINNNPYIKNKTEIIDDIESIKNSHNKFTIDNYATVMLSKDDVDIGDAYVNFTKEKSDNI  
AYYCTHDTVLCNCIFKYDMIHDKIIAFSNEYLLPQCMFAKYKSSNNISGLLLKTLYSNKTMIYPGNVEEK  
FEGGYVIEPKQKYIDSLTAVFDNFSEYPSIIIEANLSPEKVVKVILFDDEEAANKVEKYLKDNYKYPDYC  
YIKI---  
IKDMYKFILMDRRELGVTTQMVKDGREMKNMYKDLKNKNKDVDHNFYSSALYSKKITINSMYGLSGSERF  
IFNSPYCAEYCTVQGQNCIKYIQTLVNNSKYIDNVLLNKCNPFTNEPIKTNYPGNLNVNFFNVKYGDTDS  
LFITVNFESVKGHCFTFLGNVINNKILTDNFEFEYEKMYWMIILLAKKY--  
IGEVDINDPLLMDDTKGTALIRRDCVTHKTIKNTINILKDFLTNDNG-  
ININVKINDYLSSAFKIIENQNLDFKFSVKYSGVYKDPNYPICVKEYNLKNPNKITKGQRFDFIYAH  
KINKWNIKTIDISKHVIILEDYLKNKNNRICVEKYIKDILSNLDQIINDKNIINIDIMLNSYEPQ---  
MVYIKLNKKIFNYIKSRLKSQEILYDKTNDMIENI---DLDIICPLILYNENDKIIDKMD-----  
KFCKYQLREQLELINNININNSCNSPIYLSLVCPCGYGKTIILGIDIISRLKYKCAIIVPRIFIIQWLDK  
IKQKN-  
NIFASTCGRKKAIEQIKNGECDVFICPDKHLENDIIRNYIYNTCSLVIVDEAHRYNANKNIVMTRFLYNK  
IFKFLCLTATPSNMNTFINEFIDINNQSDIKKLIIFNKIFTPINNNCKYYYVNKIT-  
NNKFNIYIKNCISLDRNEIIDLKTTDNT--  
KCLILTDYRLHMMIYNLLKKTHLQNIYIYDVKNKKCNLLTEIKNKEKFIIISTIAACESLDINNLNTF  
HVLLPITNSKTIKQICGRIMRNM-NEDKYTYIYNSINNMIMYINDKTDLIRKVLSD--WECVEK--  
MSEFDYDKLRAPFNMAIIGKTGSGKTTFLKNLLKIGGFYKFIYLITSSEVNFYFKFIYPNHVFYNNKKD  
VKYLLQYLEKIKNFSFMNQK CETLVIYDDIGKD--  
TKDKLSNFTNVCRHSLVSNIFLVHRLEHLDTTTTRDLSYHV-INSESENM DLIPC NKNLR-  
NSLLASVINIFKESKYYIYCIY-DSVSYSLISDDLENKNDYV FYTDSVIKSHIN-----  
NYEINPQVIFLFDENKNVKKTI FL SKDSIIDNSFAYYLLSTNTKLSQPEYINDHVILSFNLEQARGYIR  
NILRINENIILFSIWHNLDYYYNNNEIFDPYNIKNLLIESNDKILYMLDISITNIFCVTTNSYTNTNLA  
KEGIYQEII FNIYKNNYKLSSVVKE-SEEYSLTNNFDDIIK-----  
LSNINKYKTL CIGYDYYIKGDKISI---DNYN-DSETSLYIYIDQNNI-  
IKITNDVLITEKLYFTDILKEEIIKSTSPKSIIYIYFDTFLDSNINIYQDLKFFLNVTNTRNIFIDMS  
YKINIMTSKNHISFRSFNIDVNLCKYLSLLILGYNHIFNKIQKHARLKKIDELYSRYCQNYKDVKRQPV  
LIDSIDENLIKISDKYYVKGEDD VYIDDNGLIYQCSIY--  
YSNMGFLNNIY LASGTCYPCCYSKQKNRDEIFESC VYNKEILEDINPIIVNYGRILSKNGLSKLSPKLNN  
ILNANSKIDIVKHTNRIDFSNYTIIMSYQ-  
PTITIRNFDDMYFIINNNAIVINDNIVYTDKSI LKMNNVFIIIQNRHQKIDKQSKYDIVVKIKIKII  
KKYFNISNRNPISNNGISITDDVCTIDGELIENKNIKYFSEYNNISLKPSTSEYFKQYFDTIYTNNRLF  
IKIFITKIMHIKIKTDYTKEEKLNITNKQMSSSDNICKYCNSFNIKNKDIYSCDCSNCYTTSSKRTTI  
SSASNNKTIHCNNVLKEISNTSISYDIVDGLKLINDNNLNTKSITTALGSEYLKSKGIKNYRTTHKLIN  
MSDGNNCILTKDDIFRINIIFEDFTQFIYKNNYTKTISYEFCLDRIFDILNINYVINFNYSKLNKRDDKP  
EIWNKYIIELYNKSLIKNKFNNIIFNEYKNNICLRNMQEIKNIYLPNNTNIFQSYIDFDYVKKYKYN-  
-  
FLILLYPVYKLYWKNMYICYNQNSNKIYLDKEINTSIELIDDINIITIRSNGSTITYSAYAYATILDLPY  
RLLDINQIFGIVESSNILGILSTNEKKKFKPYINNFKFESNLRSIQIDVQLKIFDLFINRLNCVVS GG TG  
IGKTSIIPKIIWYWNLLFDGYNMFNFDINIIEKNTLLSLPRKTIINSTAINYIKSLGYSEITETPIIIKY  
KDIKLYKENNKIIFPTLLLCVNRLSINNLKNSSVIIIDEIHEH DRYADICIAVS YFLKVIRNIILISATI  
EFEIDNILRFFNKIVQVYIPGFTLFPVTEI-----  
ENTVDSIDKILLNKPPGYSVIIIFYESIPKLTFIKKKLEESIPYKFSIHGKTDNANEVIRYIENKKHIHV  
IISTNYLESSITISNAKLVIDNGKVYRKEFIDGNITYITNSMYKQRKGRVGRVSKGTYIRTYTLKLNTFK  
NINYQYLWDYIIIFKYGLDIKKDYFVIPDNINRVDKTVNYMKSIGIDIDKIYRIFNKYEINMLEYFIIY  
LYGSEEK LSTDDKNIIIPYKIYNIYVKMNVKIKLESKRSI---  
IYIFKFINDVYDGPYINTENVYFDKIYYL KSENPLIIRIEEDIANLFLQCDPRDIKSKVLINVELPFKNL

-

NYDLPTLFNREEVIKISKSGHEDVIMKITYEGKEDNKKSYLYSSLDNKGFTYISISISISIRKITSLNK  
IEYKIISNKTYSHTEIRIPQYIAHGNTSENDNSITQSNPPGGFFNVSKSLKMMVTTRIEQTYIYPRKK  
TKAYTYHLAFISKKPSFMPPQFLTLIDFNPKIKVIDSKKTFLLQIDIIALIIALSNDNIDVVYKIS  
SGFSDDISDSIKILIENTKNILSEYNNDARQYVDKIEINYIKKKNEITLQDYFNIFNDFLPHIRGKYN  
EKCMYMSILRQSFVSIFQSDVYPDKDNLATRRISTAADIFENIIRTSIDNSFELARDKISGSGKNNIN  
NILSQVKLLPQITQAFNNFFNMQDTKNSDVVKIGTHSNWAESIYISNAVGV---  
SIELTKSLTQRKLHASSINVLDMMTPDHGKTGLVKRLCISTLISHYPIHIRKQLFEEVREFIENKKHT  
LKEDIISGVISIIDEVIARIKNSETESFIKDLKYAKIGLFVKNDIGIEILKDRYFQIRINVGKCRATQPV  
FRVENGELAFNKYPNLHAELKESNSYTDVFTKYDIEVIDVQMIYSNMCNTVTEFNSSYLEQRKKYDY  
VRLPNLYFSYLTSCMYDIGKMTGVRGTFGTAQSKHIITGPPDNVMNKYDTCNYLAYPERPSITNIPMEI  
SGIANSIGTHVLVGGFFSFN-  
YNVEDGVIVNKESINRGLLSVISLMSVKNELSDTQINNNNPSAENSYSKISATGLPSIGTVLVQGDALYR  
CLKPKFKNDNRYIFDQSETLSNTYPAVVERTRKQGTDLIKIDMLLSSYRRLSVGDKI-  
AKSVQKVTVSKIMEEEDMPYNENGERPDIIFNPSIISRKTLPLYDEVSLCNMFSKIPYNDKCDVEYINY  
PIYTDKSPDKYFNFIKKELKKIYNNVTDEELNIIYCRQTLHYPHYTKPKETKSFMPMLFCRLSQMSAD  
KISVRNRGRDLKYMQAPS-  
GKKKGGGIGIGEMESDVFATNGSVYAIHELQSDPDEFYLPAHICGNGCIFATYEENIEVCLQCENLGLSP  
IIKMRLTYATKIFITLLNARGISLIPVKDNQSIRYISDDNT---  
MTTFKYTLLDNSTIDAIPVIDSIGNDNE-  
NSVKSPKLGKTFNVCSTCNLTRENGMHPGRTPLRDMCIVKSGCIKNVLDLNTLCNSCFMIKNNTIFS  
EIEKYNENINLKEILSGGVKCNNENCQNTITGTYKYNKKSIFYVKKQKDILNKTVYTMLLGIPDIIYPY  
ADSQLQPYKAFYANNIIIPVLPSPRPNYF--DN--  
KESHVMTTKLQGLVGTSSQSRDESEVQKIYNDIDNVKPNPYKTSNVTLNIQVGGKGSIVRSNIMARRADN  
TARCVAGPTMD-  
KIGYIYIPKIVAKTLTSSIIYNRFTENMIKMLNDNIKYILLRYDQLLKIKPQSRLNLLKMKYGDRIE  
VELEDNDVILFSRQPSLHKFNIIQAGICKIWDNNTIATPTPIANSMLDYDGDENNVYKLSVSS-  
VESLFTMLSVNMKNYNSPFIQGLIQDQIISVHMIYNKEFSLQDVIYILGEYSY-  
YIRDNKKTYSGKELLSLLFPDNLTYEGMFDNGKITLSNISSKQVVAQSYSFSNLSQLKNNIYAVYFIDV  
ILYVARNFINLYSFSVSLKDIPDIYFIDDVQEYINCKKVIQYVALQYY--IKKDHIKLT----  
YDEMENIRIQNGNIIISNVKNKINLKFDEKLNTIMMMKNSGYKITLDELVTVLGCTGQQGIDSDDIKPG  
IMGRVFDSTLPGSLDIESLGYVKSSTIKGLKFEELAFHTYNSIKKILKITCETSSAGSIGRKLKVFMEGV  
KVDHLGRSVLNNDIIWYNTNHKMTGGDISKVEILTPSLEMVNYTLIKEIYNENKKYLLTNFNTEINKEF  
IFPINIKLEIQSYNKKPISDIDALKLIDEFIEYVYINIYFYINITIDWFKYILYTYLDRNTVKYSKELLY  
IINKIKLKLNSLNPGYPIGLEYANNIQEKFTQQLSSFHHTKSGTASQLGFSDFKDVELSKNKRDIV  
IAFTTHKLEDIKQMEYLCLKNFNPKINIIEEESDMV-ISVIKKYYIN-  
DKISLYHYLQMYIEYLENNKIIGY--  
WITMLKDNDITVIFVKIKTPYNINKIYMIKSIPVSVSKGKISNINLEIDVKYNNNLEEQNYRLKFYIDSV  
TDFINFDRDLYLLGPWFTYNSFGIQAFAEYSIRRRLVSSTKE--  
KSMEICYIILSKLMCLSEMNIKRIREGKQNVIKSAIHGSSDAITTAAYNNIIDPNNDIYSQILSSQIM  
KLGHGYYDCYLNLRYSINNSVTEQDINITSIENFMSDVSDIINDCIKFYSNISNPNVNEIEFTYINP  
DLRILSNIYNNESKKKTYLEYVLNKKSKLRQKYKYDYPT---FEIANSYFLDKL-  
TNNWERKTIISEDKINEILLRHNTEDNDIELPLNDIDKINLVFVSLYIIINDLIVEFKIKSNIGPLSSN  
KSTHFNDIETYRKNITYYLEIEVLKTKLDNNVLYDNLVKSFEYIYKSKNISNISLINKPKIKTHMIQYNK  
LTIDKESYIMAIKIDGDVFNVMNG--  
ICNIIIDYDMVYKFCNIDKNIQMGMEYIKDNKKIYPFYFSKLNNKIILDYKQQYYNDNLLCHPNMQIK  
FNKLTCLKFDENNVTNVLKFKYSIEYDGVLLDITDNDSDYKFKIDNTVDVICKLTYR-  
GTYLHNDNKLYITFTLYQDNKNFTEILKYEEKNEIEYNNYVNLIFNNNK-  
FGPKMLSPIWCIVEYSFESKIIGLRIDKTNFYRQNYNGNLDVILTHIHEENYNDYLSLNETINVI  
DNPRSKLLLNEVNYFMNNTIRTSINILTNLYLKTNGISMAISKLVTTLPN-

RYVLSIDIGRGGDLTKYYYVGITMLGTDPDIFAIKEARDRYKKLQTISSNAQAYKFDSLNMISLNDNYENE  
IKNKFMTTHFGVIEWQLAIHYSYNNNTKDMILLKLNLSNDGTVIITCLDGDEITNRLNENPNLIYNI-  
QPGITYKISKISDDKISVLYNATMTEWLEEYII-  
TDKIIDDFAMYNFILSDVCKFDDIFKYNSDKSEVLSNFLRKSTKKFYNDIKNDKNYNNDDIKKIMSLFKV  
YTFVYSFKTDLTNEEVSEAAKLIKNTDLTNNCIFSKYKNIYTEFKLINSKSNNCIYCYSTNIKIILEHNN  
GIKG-  
FCSIVCRDSISKQIYNIMPIYKFSAYLVPFELIKNKKEFLNNINIKNIDNLYGGCHLTNNKKVELFITN-  
-

>Anocu

MQRSLI--

NYNKINSNRSNIVTETRDGNYNIPQEFNCPCSIENYYICKITDNKLEGCNFGLTITLPEIKGIGTVRY  
QTNFVYKLIIEFIIETIDNIIILKTGLELDFDIKQEHNYINIIGNNQNYCIFKTGKFSDDIIFNTCEIYIP  
LITIFDMSNPRTCLRLPETKLQIRIKFRPFKDILIIYDIKYRKNLSIQDVLQPYIKFLGYNTCSDEFNR  
YIEELVTSTHQSNKKNYTPEFSSITNILWYTKSFNNKQFISYPNYPETEESFIDSYVNRILEDLIIVDC  
NKKRQFSETCKFLKLSDEISFDNNVCIINITNIPEGYDVYHTNLSFNRRNSTNEYNISKKFKILGEY  
LLEDRIIFRDIKHNITIHDSIPIEIWNAEENTSTKDLRSKKSQKDIINDPYIFGLDLLSKSGIFTR  
SLKSSNETILAYFNCNLYTTITNSSYPSIFLYRFNIHNLFAEPSRLADIEKNFRCVNITIDWKEFP  
DMDPRSLFPKLIICITPIKKIYDNNIITQILDKNKI-

YLQSGLCVSKEKYNMNIETSNVFSLNKIKDVEDNPLPEYHEFILEDNDYFKLFIDIDIDKKFNQTYVY  
KSIIIEFKEELINYFESCFQYDETKFELHNIHDNIYFTISNPNKISIHVFFDNIYVNENSFSLKNNIKI  
LKNNSNISLIKIDINPFRKNTQLRFIYSRKS-DSIYYHIYENDDDLKHLYFTYVDESPLHIKLLASIN-  
YDDIYPQNFLSSEKFIYLADEDNIIKKLCKIKGYTMDLNLDMLY-K-C-

YCLKDKHKHNHYLLFNAEILLKRGKINSCLPKIFYPRLTSYEISKFIVSLDIIKKINNDIYVFDNKKW  
SKLDDENIYAGLALILCEHFDDVNDYIANRYFKEAKNTIKSHLLGYNDLCNNPYIIQFRNGVYDINSKF  
YKGNDAKKYIKLSYINIDYKDNMESEQSFTKNYNLKNIIINLIPVDHKLHRVFEANLSSILLAYYKQVIT  
IFYGDTNSGKSTIKELIRSLSTMFIEIPIDNYTYEVHKGPDALGKVVDDKLVSFASE--

ADYNETFKLSLIKRMTEPYILARDLRNNKCDQLNTLQFIDMNHKPKFDGIDTAIFKRIAIININTTYFD  
ENLFIIERASNIIKRDNMLWNRIINKDFTLPLFYLLRCWVLKYHMAINLLSTPEIYNDEKDNNTTKFC  
SGWGLKKQIRANARDYYDEIDIYIPIPLRLRNEKSQYIDVKGHTPVLVVDHVYHPNCQWYKYKYSEIWD  
RLMNKILDDLKVPANIPQILPHQLATLDYLYKTCVENNKSULLFHKMGSGKTMISLLFAIICNIKKIL  
IVLPNSSILDMWKSNI FDAIKLLMKEYLLENIEFTTRTNILGVGQNIETIENKIQYNNYIMIIDEAHN  
FFGNITGKVLINIRKKTNIYVLLLTGSPITNTVTTLKDIVELLAKENFDNFKYIQVGNKVFESKINSKGI  
EFLNTHLSGLISYYDEERKDLQVVFVKGKIFLYPLVLCPMSELHEKNYNEIADVTEENEMFIKLLMNVSF  
VALGPKDNYIHFKEI--

SDQQIFDNLYISNGRFYGSELIDLNISSKLKTFRDTIKERGKRFIYFANSTIGSAIIRSVMRANGISEYG  
KEILNNTYTCVCITDKKFIITSKNNNYINNLSIFNEDNDEGHNILLFGSKIISEAYTLKNVKDIWFLT  
VPETKSEFDQCIARAVRTFSYKDLNIKVTVRVATLSNTLISDISKTIEQYRYELTDLSDYFRKQLYSEL  
KFEKSKVADNIFKKNLVITDKINNIVFEFCIIEKIRRFCYTNNRFKYNDNFLSKDIDNNIYDEILHNTNE  
AIENHLIIYNNVFGICYLDKYNDIIVTIPVILDYNEYLYSVRL-----

IDIKIFNWTYVKNRLEEYIVCKAKDQEIIYFIFDLNYFLCSEDDVDNNEYLKKNIIIEFKIISNEVIQY  
NFRHKDKIKNLYLFRFKIRVHSYNHNFNFYRWVYVLDINPAGSYKINKCKEFNVKTYCDDPKLFSNK  
ISDKFLPVSRLSFDIECKHNGIFPKPETCPIHSI-CWYDDGSSIKFILINTNIILD-

NYVKFDDFINDINNNVYNYIYATEQVILEFMIYFLQDFDYILSYNGHNFIDIPYIQGRLNYYRGNLTQN  
IMGVNNLLINQKITNLKTIQDIRHDIASNNATTYLDIYNYVKEFYKLPYKLDIAKYKFNINAKTTDGG  
ITVYESSNIKKEMFYKVLRTANYCFINDKAFIYDKKNIINNESSIKKSIGKEFKISNNVEITLSKDDVE  
IWDAYKNYKLSKAKDIAFYCVHDTILCNKLFEDMIDYKIAAFSQLYLLPQNKSLLYRNSTNSLGQILYT  
LLKNKMMIVTGHVDDKYEGAMVYDPKKKYVSNPTLIFDFKSLYPTAIEGNLSPEKIEKVIISDDEIANT  
YIDTYLADTYKYPKYLYIKIKSNINNIYTYIVTDKSSPGLISIIILMKGLDERNKYKQLKSENNNILCNLY  
DNMQYGIKIINSIYGLLSNQFIFRSKYCAQYCTALSKKSIMYIHEILDKSIYKSNILINSCNIIFTQKL  
IKTKYEGNINEDFIDIVYGD TDSL FMSIIFNKIRAIDIGNFLSNIINNDIFPDIFEFEFEDVNCWIVFTS

KKKYDDIGLKKIKDIILNFINKGTLLVRRDYCKFHKDITYKNIVDIIKCGLKSN---  
KNVELEIENYVINVIDTLANRNLNIDFVKMTYSGKYKDKNNIIDIVKNYNRNNPNKIMKGNRFSFVYGT  
EISSWNFKTNDINQKIIIIIGDDIKYDNIRICIEKYIINLLNNINMLLNKNIIINIKDK---YKKN---  
NLYKHMNDKLYGLFYEKLKTQHILCYDSNNPYFLNKENKNINIIIPPSIISDLNLQIHN--LNNDIN-  
KNSNIILRDQRIIVTKI--  
EELSNFIPVYVLLCEPCGYGKTIISIELICRLKLCIAIVVPRKFIIQWKDKFNTNTFNIFTSFNGRVDAI  
KNITNGDCDIFICPDKHLENDTIRNFIYTYFNFIIDEIHKYDLNKDIAMTKFLYGYFKLVLLLTATPK  
NINLIINNKKIKINKIDQIKKEIYSFEKINDSNITSECKKFLSKIN-  
LNKYNLYTKNCISLDMRNNITITQIIQINDTT--KAILLTDYRNHMHLYTLLKSEL-TDIIYIYDVKD-  
NKYNLFSELECKNKFIISTACSESLDLTNLNTIYLVLPITNKNLSLIQCTGRIMRTS-  
NENKYIYLFNSYLNDIIRTFINDKCNFVKRILNN--  
WEYNINMIIIEKIDYDKIISPFPMAILGKTGSGKTTFLKNFLIETREKFDYIYLVTRSKTCYHHYIYPNH  
VLYLDQDDIKAKLSFLDNIKKFSFCLEQNDTLVIFDDVGRE--  
TKDKLSNFTNECRHSRISNIFLVHRLEHIDKTRDSISLYV-INSFNINLEYLEINKSIK-  
TMINTSILNAFSYKERGLFLIIQ-DSKVYSLVINDSTIKTNEANVLYTNSIIKQYI-----  
MYILQPQVIFLDFEYKHKVRTIFLSNNRLIDNSNVMYYLNSRNTKLALPEYINDHIIILSFGLDARGYIK  
NILSIEEDIILFSIFNNFDYYPDNTIFDPYNIPTLLIQTNPVKLYSIDINIVNVFCVTTNEYSKTNLA  
RPSIYIDIINNIYKNNYSLSAIIKD-SMEYSLNNTYKDLIK-----  
LSNLDNYKITYCISSNFYIKGTKITL---  
EGLNMEDYHVLIIYDEKLNPIYIQLENDVLAVTKISDFINILKEDINIKSLNPKTIYIYFNTYLNPNLTI  
QFDIKFFINQTKTRNIFIDLSNKINIMTSKDHISFRSYSINSDLCKYLTLILGYSHIFNKIQHGRIKK  
VNELYPVRYCQNYKEIKRQPILINVENKELIKISDNFYIGKEDDVYIDENGLIYQCSIY--  
YSNMGFLGNIYSASGICYCCYSKPKTNDPTFLTCVHGKMIIEINPIIINYGRILSTHGISNLSPKLNS  
ILNKNSSIEIVKHTNRIISANNYTIITSYQ-  
PSTSIKDFKELYNFILINNAIINENTINTHKNILNTNKVFILIQNRIHQLKINKAIKSDINMDIKIRIL  
LNYFNVSNKTPISDNGITIKNDICYIDDIPVNNKNIKYFTEFTNVSLPKPKSTSEYFNNDYLNNISSDNLF  
TKIFVTKIMYINIKTDFTSKNKLDISLNYNIN--  
MDCKYCNSFYINKNNDLYFCDDCSSYTTTTSKRSIKSKPYNNKKIHFSNVIREISHNNISDINHNDFEKM  
LEDNNIDKKSITSTLVYEFKTRGKIKNYRQTYSLMMSKGDNIILNNDDISKIYIMFDDFIKYLKCKQI  
RTIDYGFYLNKIFDILKLTNNLKPNTFKSNKRNNKSELWNNYIINLNCRSIDII-  
FPNPIINDYIKPYSFRSMNNLSNIYLYPNNTIIFQTEIERTYVVKYDPN--  
FIILVFPVFKLYWSNVFLCLNNNKIYLDKD-  
TKLTLYEMNSIFNIIIEPYNLYLTYSAYAYSTVLNNKFKLLNIHQLYGIVDDANKLGILS-----  
NSSVKSINSFTFKSDLRSTQIDVQLKVFDFIKRDNICVSGGTGIGKTTIIPKLFWFNFLFDGFSEFEF  
DTDIIKKKTVLSLPRKALIRSMGMTYINSLGYKDIINGAPINLRYKDVKLEKQNSTNNFISFTLSVNRITL  
NIIKNTNTILIDEMHEHDKFGDITIAVCNKKNKIRNIILISATIEFEIDNVKRFKINQIYIPGKSLYP  
VNEL-----  
EIIINVILNIIRNLPNGYTIIFFETISKINEQYKYILNLSCKLYKIHSKIENINEIINKIENKHYIHI  
ILSTNYLESSITISNAKVVIDNGLMYLKEFLTGKITYITESMSRQRKGRVGRMSPGTYIRLYQYKLNLLK  
FINHQYLWDYIIIFKYGLDLKKDYFVIPDDLTRVDNTINYLLKKQIDINNIIFRLYNKIELRMIEYLSVY  
LNYDNKILENFIKNIIEISYELTLLLKSLNVQCKLVRKRKYNDY-  
VCKFILLDAYDGIYFNMYNINDDNIYYIICEDPFKIRIEDNIAKLYLNNDRLNIKSKALINTEL PFRNL-  
MHDIPILFNREEIIRLTKSTTENIVMKLEYIGKEENKKSFLYSSFEGKSFDMNISIAVSMIKRITSKTGI  
ED-  
ELIFRNEYPHQEIRIPQYVSYGGNII EYDNSITQTNNSGGFFILSKGLMKFVTLRIEQTSVYLKRKSKP  
FVFHASVSKLSSFEMPPQYL TIDLNPNKIKCITDSKKS FIEVDIILLIKLLSGWEFDKLTAIITSKF  
DDDIRDKINIIINNAKNILQEFNNNINDYITYEVKRSYNKKKDSPTLQEFNYCFSNFLPHMKYGRLLQS  
MYLISIFRQFMISIFQPEIYPDKDNLVTRRISTAADIFESIIRNAIDISFQQAKEKKSSEDITIQNINNI  
SQFKIVPQITSSFNFFNMQDTKNSDVVKTSMHYNWQEPPIIVSGAVGS---  
SIELTKSLAARHLHESSITVDFMFDTPDHGPNTGLIKRLSIGTLISHYTINIRKQIFDEVYEFIKSNVVK

NLIDEINGVISIIDEYITSIKESVHNFIKKIKETKRGLFIVRDIGIEIIRDTIMQIRINVGKRAIEPV  
FVVEDGKLNIRKYKNLNEELNNYDSFTNLIINYPDIIIEYIDVGQSIYSNICNSVIEFDKYDIDQKKY  
VRLPNYLFFSYLTSMDYIGKMTGVRGTFGAAQHKKHITGPQDNVNLKYDSCNYLAPQRPCITTIPMEI  
SGIANGIGQHTLVGFFSFN-  
KNIEDGVILNKDSVDRGLLSVITLMPVKNEISDTQINNNPNPENSYSKISVSGLPEVGTVLVQGDALYR  
CLKPKFKDGDNNYIFDQSEPYSSHYPVVERSKRGTDMIKIDILMSSFRKVEVGDKL-  
AKSVQKVTIADIMESHMPYTEDGEVPDIIFNSTSIISRKTLPMYFDAMLNMYSIIPYNDGGEIEYINY  
PTYTELTAEDLIIYITNQIKKKYPNIPDAMLNDIISRKTIIFNPYTHKPYKTKAFVSPILFCRLSQMSAD  
KISVRNRGRLDKYGQPPS-  
GKKKGGGKIGEMETDVFATHGAILTLNELLSDPDERYLPANICSNCGIFATYEEDIEICLQCENIGLSP  
ILNIRMTYATKIFITILNMRGITLIPIKKKYDEIYLSQY---  
MDYVNYKYSIISNEIIDAIPIIINSISNDSE-  
NNVKSTKLGKTFNVCSTCTLTKENGMHGLGKTPLKNIMIIRPAFIKLIINFLNTICNNCKMIRNNIDIS  
NVLNKYNKSPQLRREIQLGNLRCNPNPCGKTIGSYKYNSKQFFIRKTEDISNTQIYNLLKGIPDIIYNT  
SESILTPYEVFFKNIPIMVLPARPPNY--DN--  
KESHVMTTKLQGLVGSIIKFNTEDIQKIYNDIDHVKPKPKYKGNVTLNIQVSGKESIPRSNILARRSDN  
TGRCVAGPSME-  
KIGYINIPSLMAKTLTTSIYYNRFTENKIKNLINNTVKYILLNYNQLLKIKPDTKINNLMKMKYGDRIE  
VELSDYDIIILFSRQPSLHKFNIAALCKIWNNTVGIPTPIANSMLDFDGDEVNEYKTQSPGN-  
IEALFTMLSVNLVKNNYNSPIFGLIQDQIIGLHLLYKEEYDINEVIYILGEYSY-  
FIRDNLKLYSGSELLSLIFPDNISYEGVFDNGELIINNISRFFVVSQSYLSNLMSHYKNNVFAVQIIDT  
LLYIVRNFISLYGYSISLLDIPDIKFINYIYNYIDCCKVIQYVMGKYNSISNHDILLT----  
YDELENIRINNCTNIINNVOQKIIELFKDNPLNAIVAANKSEYKITLDELVTVLGCTGQQGIDSNDIKPG  
IMGRVFNLSILPSSLDIESLGFIKSSTLKLTFKELGFHTYNSIKKILRITCETSSAGSTGRKLVKFMEGV  
KIDHYGRAVLHNTVVWQANANYLKMGLSDIVRVNILEPDDNMENYNIKKLYDDNKYLLSDNFTRINKEF  
LFPINIKLEIQSKSKIDLAKDLNKNIEKFINYIHLNIYFYLDLTFWKYILYTYLDKFTIISYSAELIDY  
ILDKIKLKLNSLSPGYTIGLEYAHNIQEKFTQQSLSSFHTTKKSGTAAQLGFNDFKDTVELSRNKPDI  
TAYSTNKLEIINVEYLSIKFFNPDISIIEENSGLV-ISIINKFYVN-  
KKLTLMQYYQMFLDFLNCIIINSY--  
WSKMLYKDIIDIIITIVAPYNINKIYFMQGISSAVYKGMANTNIDINIKYDDNMVQVDYRLRFYIENV  
YDLSNFDTRDVLGWPFAFYDAFGIQAFAEYSICNRLINSTKE--  
KSMEICYKILSKLMCLSTDMYNIKRLRDGKNSILKNAIHGVSDSIQNSAFNNIIDTGTDIYSQIFENSLL  
NIGHGYYESYLNLNKYDSISIKKEILEKNIESIENFMEEINVLIKEFIEFYNNVDDDKLHNEVEITYLFP  
NLILLSNLYYDECKKTTYLEFSLDNKKRIKFRQIVPYTTQDKFEIKNSYLANKLNVNKLDIKSEISNKNI  
LEIIFRHSTEDSDITLPSKQELNQVRLTFVNIRIMIDNLIIEFKYKANLGSASSNSSTYLNNDITARILT  
TYYLEIEELLNTKIDNDILINVLNKSFGYIFSIRNLDNFSLSEYVPIKTFMITYDKLIIDKSAYVMTPKIN  
GEVYVENG--  
ICNITIYNFIYKINCINKNVIMGEGELIIDNKHIFPFYFNLIKDNSYTDYKQEFYNTSIINFSNMKIH  
FNKNIFKFNNTVNEVLKFYRSILNDGVILLDISNNNVKDYKFKLDNTVDIIAKLTHK-GIFRTQKDG-  
LYLTLSLYNDNKNFVKMLEINLNKNEISYDNVINMLLFKNVD--  
FGPKILVSPICYIVEYSFSSTIIKLRIEKTNKFFRNNGNLLNVILSQFHEKDNKLDYMIELNKSNNLL  
TETRSKILNKDVQYFLEQTRTSLNILTNYIKTEAISITVSKLCSIIPN-  
RHVLSIDIGRGGDLRKYVYVGISMLGTEPDISALETARSRYKEFQISSRAKSYKFNSINISILDDNYINR  
VKEIYLIPQFGVIEWQLAIHYSYNEDTKNNILYKLNLAGDGTKIIITCLNGDLLSEKLQNNPHLNYKI-  
SDTIYYKISKIDDNRISVLYNATMSTWLEEFLLI-  
KKTIIINDFKNYFVLDIDFTFDKIFNNDINKMRVLAVFNRKSTKDFYSNIINDKNYENKELQELLSFFIV  
YIFRYSYKTDFTKEKIDAACKLIKNSDSNECISSEKFFYLITNIKLSCTSSSTCLYCTSDIINIILETKF  
NNTG-  
FCSMICSNSICKQIYTLPKYKNNYLIPYELIRNKNHINKIINLRYELNLYGGITHDKYNKIEFFITKQ  
-

>Melsa

MNRSLI--

LYDNSNSSRLNIYTLCQNEGNYNIPQFTSSSSVYENLYIYKITDSKLEGCNNFGLIITLPEIKGIGSIRY  
QSNFVYKLIIEFVIETIDNTIIKSGLELFEFNRSKYSKIIGNNIDLCFNTGYTADDIIFTSREIYFP  
LITIFDNQNPHTCLRLPKTKLQIKLKLDFKNVMVYDKIYLKNSLITNIDLQPYISFTGYNTTGSEIKNR  
FLEELVNCTTNCNKIYYTPDFSSITNVLWSIKVFNGKSFISYPNYPETEESFIKSYVDKILQDLLIVDF  
NAKRKFNKKCKFVEIKPDVVKHDNNQCIINIKGIPEGMKLYYHKNILSFRRNKNDEYNISNKFILGEY  
LEKEDRIYFIDVKHDISISDVSIPIEIWNAEENTSTGDLRSDKMKEMDVIVYDNFIFGMDFISKLGIFTS  
TLKTNSETIYEFYLSNVCVYTPINDESYPISFIHRFNQHSLLSEPSRLIADNDKNFRRISICINWKHYP  
DTDPRSFLKQYMIIGMTIVKKVTYDNNIINVHIVD-

MDKYIYLQKGLKVKLLKKKEYVNQIDKLTLEKINNAIENNDSIEEYHEIILNEHDRFKLFFDIELKKKYN  
SDYFDSTFENFKDEISSFLASVFEFELNEDDLKNIFDGISATTSNDPNKISTHVFFTNILVSNVFTTLK  
IHIHNYKKRTTNELILGIDEQVFNNTLLRCIYSKKS-

NSKYYHEYDDQNDLQKYLVTFVDDDEDNIDLIDTDTECLTDIFPHVFLEKRQTITIDSNTTLIKNLETIEN  
QTLDIYLTQTH-A-C-

ICGKITHKNHHYLLFFNQNIQLIKYGNRHNCRIIKFYPKLDSTAITKFIKDLDIRKVNKDLKLYWDGMKW  
MPIIDDMIYKIALKLLDEYKNTHDKYVSTKYFKEAKVRILTDLDDTDYNTNPLYIQMCGIFDLNINIF  
IYGIEAKKYIKPNYIPLSYKNIEMEEENNYMENYNLVTVINNIPENHKDRKIFECNISSLLQISKETIT  
FLVGPTKSGKTTIKLLAALFGNLFITPIIDYVYKQHNHSPNAWLKGLNGKLVCFASE--

SNACDKFDSQTIKHMTERIISRVLNSNEGDQHNATQIIDTNIFFSIDITDMAILERLAVINIDHSYFN  
STKNILNILDITRPRNPNFSNKIENGDFSLALFNILKEWVRKYHLDLKIHTPEFKTTNTNKKMD--

TPNEDNQNKLTLVSSINFNNKNIMNIKCYNRYYSTIKKLRSRKAIEIIVNEKFIEFPNEYKKYVALEH  
LIEPMNKILEDLKEVPLYIPQILPHQLATLDFLNERSLKEKKSULLFHKMGSGKTIISLLFSIIASIEK  
ILIILPNTSIMDIWISKLYDSLNDKYNLNNIEFTTRSELLGTNKNINDIITENIKKYDNYIIIIIDEA  
HNFFGNASGELLIHIKQNSTARYVLLTGSPISNTIESLKDIVELLTNETFEYNKYISAGNKVFQQRINKQ  
GIELLKNKLTGLISYDDEDRKDIPSPIFQGNKLLNYPVVLCPMSKLQEDNYNMISNQTEMDFIKLMNV  
SLVALGDKENYTNFDLLMASNKQIFPNFYVSNKGFQELIDLNISSKLYFMNSITSPGKRFIYFANST  
IGSTIIRSVMIANGISEYDKEIVNMFVCLKERKFVIITSKNNSYINKILSVFNEDNENGSVIMFLFGS  
RIIAEAYTLKDIKEIWFLVTPETKSELEQCIARAIRSFAYKDNTRVVVRIATTPNALSNEISQIIIEKY  
KDELSLDPYDLRQLYSEFKSEKAKVAYNIFINLSITNNILNDNILKCFIIEKIRRYSYENSRYKLKDSY  
IKKNLKF-DYNKIEDYVNEFVNDGVVYVYKSGFTCYIDWFKDDIVVKQIILEFNYYLLSYNY-----

IRIHIINWYQYNYSKLERIVCKCKNDELIFFIIDFYHYFLCSKELVNNNDLKNIDNLKILDVDLPKY  
NFEEINIKRNLYLFTIFKIQLESFNHSFLDYRWYVYVNNIDPSACYNIDDCKIFVTKTYVSNPKLFMNK  
IPLPK-ISRSLFDIECKQTGSFPDPKYPISHI-

CCFYDDKKNILILTNCNLYEKAKNKVYDMECEKINMNSSVIKIYTSEKNILIIIFQCLLFHEFDYILSFNG  
HEFDIPYINTRMDIYNLKLMLNPFPGFNLNVI-----KGDASSRY-

THIEYSSILFDLYVYTKKTYVLPYKLETVCKTKFNINAIALIENTNVKIPDTKNKLKIFYSVIRTANYC  
FINDIAYQINKNDIIDNMQAINQSIGVPFIVTGNIVVALSKDDIDIGDITYENYTIKANEIGNYCIHDTV  
LCNKL FETDLIHEVITGYSSQYLLPQNQVFNFTSSNTATGQLLYTLLQEKQMFKKYITEDEYEGAYVFD  
KKYITEPIILEDYTSLYPTIMRQINASPEKIKVITSNDNIMNAKIDNYIFNTYNYPEYMYIDITN--  
SNLTTFIITDCRKGDIPLMLKQGMKRSFYKKKMNDANDILYNVYNSMQYTTKIFINSIYGLMASETFM  
FNSKYCAQFCTALGRKCIKYTADILNNSYNINGIFVNNVNIFTKTHIQTKYNSNIQECFLEIVYGDTSV  
FIIVHFKNLRCKDIGIFISNTISTGIFPKLFNLEFGGVKKWMLFIEKKKY--

ISYDIINDTLAKIESKGTSLIKRDYSNFHKHHYKTIIEI IQS IENKNNSKNVVIKYIDELIKNLVNLDK  
NYM---

FAVTKRYSGKYVSIDNIIETVNKFNKYPDKIRKGRFLYIYGIYMKSWNISIKDISKMMIIPSNLNMF  
NERICIESYVIKLITDVSQLLDDKEIT---EKLSKYKKK----

MYSKLSPALHAALRSRINNSVLCYDIMNPIIYNDPNTVNLIRIPPR-----

MLKNISFNLKISNLSNLELRHQKHIFNKIEIYNIENSKPLYISLVCPGFGKTIISIAIINKLKFKCVI  
IAPMKFIVQWVDKINNKLKIYSSIDGIKKALKDIKNGDCDIFICPDKHLQNDIYNYIYENFSIIIDE

IHKYNLNNNDILMTKFLYKKNYFKMCLLLTATPANMNLVTHMIKANGEQNQTKNILVSDINNSFSNNSIN  
ILLNRIK-QDKFKVYMKNCSKDMRNNCIVDIKFDHDT--KALILTDYRDHMILYNKLSII-  
NDSVYLYDVKQKNSVSSLNEARNKNNFIIIVSTIACSESLDLQSLNTHITLPTITNKTIIQAIGRIFRTN  
KDDNKFVYYNSFIDNIIRMFINDKYNIKKQIDNKKWIINKYMKIKKFNFDTLKEPFNMSIVASTGQGK  
TTLKYLILNKLKHFHFKFIYLITNDDQGYYYKYVYPNHVYFLTKEKPEYIVSICEI-  
KKFTNTLNDKSTLIIIFDDVGN--FRNKLKNFTNECRHAFISTIFLVHKEIHLDPDTRDSMKFFV-  
INKKTIDLKYIIPNTSIR--KEISKDIVPLLYKKFGLYIVIDNHAELFYIYISEDEM-  
KLDNLLSTESSMKQIIEKIKKMYIINPQVIFLYNENKKIIKTIFLSKDSMIEDSHVMYLLSSHSDENK  
PQFINDHVILTFTLEQARGYIKNILGLSDDIILFSIWNDFDYLLK-  
NGIFDPYNIQNMMLLVEPNDSILYNIYQNIVEVFCVTTNKNIGSQLARSNVYSEIINNIYKNRYAMKSSII  
D-AMEYSINIDFQDLLR-----ISNIPDYNKTLCSYNYFYIKGNKITI---  
DNFDSMYEKYLKIYDKN--  
ININIYDDVLYVKKLSDFTDILNKNINIKSLKPKTTIYVYFNTFLNPNLTIEFDFDFINDTKTKNIFID  
LTGKINIMTSQSHISYRSYNISTDLAKYFTLFLILGYSHIFNKVQSKAKIKKIDELYPSCYQNYKDIKRO  
PILIDHIDESLIKISDNFYTGKEDDVYIDSNGLYQCSIY--  
YSNMGFLGNIYSATGICYCCYSKPKIRDITFNCTVHGTKIHEEINPIIVNYGRILNPSNLSNLPYKLN  
LLNSKNQIRIVKHTNRIILAKNYTVIMAYQ-  
PSTIIKDFNEMYNFIIENNAIFNDNMMYTHKDIENNSIFILIQNRIHQFKINKEQDNDITVIVKINLI  
KNKFSVNNTKEISENGITVKNKCYIDGELVKNKNITYFTKFSNITIRPKSISEYFKKYIDDIYTDNLF  
NKIFVTNINLNMHILNDFSQKCLDMSSDYITSDIECKYCGSFDIEKVKDIYTCGDCTQTYTSSKRSTK  
SKPFNKKMHFSNVMRQMSYNIIDKNYEEFEELLAKNNLERRSLTTTIVYEFLKDKGIKNYRQTFALMN  
KSSDSMVS LNADDITNISILFEDFIKFLYKNGYKRTISYGFIIIDRMLEVLNITSNLKPNYTKSNKRDDKS  
ELWNNYVIDLCNRPKTKI-FPNNKIENEYFL-----  
MQNITDLYLFPNNATIFNSYITKKEVFEYPMQ--  
FAIALYPVYKLYWHNINICLNNRFIYLSNENISNTVYNLLNKFDNIIINGKNLKISYSAYSVTIIQITI  
NILNKYQIYGIIESANYLGILSSY-QNKYFD--  
KNFSFKSELRSTMIDVQLKIFEIFISKKNCIISGGTGIGKTTVIPKLFWWFNLLFDGYEFWNFKPNFEKN  
KTILSLPRKALIRQMGINYIKSLGFDNISGSPILKYKDVKKEKENNPILYPFVLSVNRITINNIKHSN  
SVIIDEIHEHDKFGDIAIAIARTKKKIRNIVLISATIESDIDNIRIYFKNIVEIYIPGVSLFPVKEI---  
-----  
ECEDKDVISILKYMPSGKSVIIFYETIKKINEYKEILESILKYKIYTIHSKITNINAIINKLQDKKHIHI  
ILSTNYLESSITITNATLVIDNGMYQKKFLTGSTMYITESMYIQRKGRVGRISKGTYIRTYSKLLQTFK  
HINYQYLWEYILVFKYNNMDYYNDLFIKPDDPSRIENTLNYLKNINIDIDKLYSKFNKYEINMVEYLSIY  
INNSTDILNEFIDNIRFPYRLTEIFHKLNVRCRCINITETEENINCSFVILNNYDGDFFKLFESNLRY  
YIVSMSPLYLDIEEYIAKLYLSSDNKNIKSKSLINIEIPFRNF-  
NHDLSAFFTREEVIKSSKSSKEEIIKIEFSGKQENKKSYYSSFDNKSFDLNIGICVSIKFIINQDGE  
SKLQLIYTYNCTPNEIRIPQYISYGGNTPMIDNSLTETNPPGGSFILSKGITKVTICRIEQMYVYPKLLK  
MKPFIHFCSFISKHPSFRMPQFLTIDIDYTPGKIKVIDSKKAFIQIDLILLIHFYSEMSFEDIESI  
RGFNNSIVRKIQILIKNSQMILANNENNIHTYVSNVIKEAYINKDNITLQAYTNSLLSNFLPHING-  
RINKGMYLISIFRQFIVGMFQPDYIPDKDNLATRRISTAADIFESI KSSIDTLLYQIKEKKIESKINQ  
INNALSQIKLIPQITPAFNNFFNMQDTKNSDVVKISTKSNWQEPPIIVSNAVGS---  
SIELTKSLEARNLHESTIGVLDIYDTPDHGSNAGLIKRLTIGTIISSHHTLKIRERIFNEVNEYILTYKTN  
NIINKINGVISIIEEYVTSIDQSKVDQFVKDIKLAKINIFCTNDIGIEVIPNRYFQIRINVGNNRALQPM  
FIVENGILNLDKYKIDKNEI---  
MSFSDIMLYKNDIIEFVDVGOALYSRICNSIKEFKQYSLEFRKTIQYVRLPNYIYFSQLVSCMHVGMMA  
GVRGTFGAAQYKHIIITGPQDNILNKFECTYLSFPQKSCVTNIPKDISGISNGMGQHILVGGFSYN-  
KNIEDGVIVNKRSENGMLSVITLNAIVAEVSDIQINNNNPSPDNAYSKINVMGLPDVGTVMVKN DALYR  
CLKPKYKETDDNTRFLDKSEPYVSNYPAVVERTRKQGTDIKVEILLSSYRRRLAIGDKL-  
AKSVQKVTVADILDESELPYTKDGLRPDLIFNSTSITSRKTFFPMYFDAMLNMFLIPYDENNTRYINY  
PTYTDMTSTDIIEYIRNKIKPLYPNISDEELNDIVYCRHVIYNPDTHKPKTKAFVAPILFSRLSQMSAD

KLSVRNRGRLDKYGQPPS-  
GKKKGGGIGIGEMEVDVFLTYSVPSITLLELSDPSEKYL PAMACSNCGIFATYEDSLEICLQCENIGLSP  
IISFRLPYSTKMFLNNTNMRGITFKI-  
REKQMPYYLSISSAKVNTEILFSMIPNSIIDSIPIIINSISNDAD-  
NNVKSTKLGKTFNVCSTCRLTKDNGLGHPGRTP LKKMAIIKPAFIKSVLDTLNLCSNCKMFRDNEALY  
KILKKYNDPTELKKEILTSASKCNNINCQLPIATYKYNIIKAQFYIKVIKDISNEQIYKMLIGIPHIVYPL  
SIGNFTPYEAFYTNNILIMVNPAPPPNHY--DN--  
KDSHIMTTKLNQLVGSIIKEKEIEDIQKIYNDIDHVKPKPYSRGTDTLNTEVAGKEGILRSYILARRSDN  
TGRGVAGPIIA-  
KIGYLGIPPEIVASTLTESIYYNRFTEQKVRDLINSPVKFIVLYNYEALLEVRPEAKINLLKIKYGDRIE  
IPLQNYSMILFSRQPSLHKFNIIQCAFCLIHKAQTFSTPTAIANSMLDYDGDDELNIYKPKSPS-  
IEACFLMLSSAILKNYNSPFAFGLIQDQLIAIHMLYNKEISLNDAIYILGEYSY-  
FIRDNKKSYTGVELLSLIFPHNITYNNVIQNGKLI LPMIDSRYLVSQSYALANLMSQLKNNVFGVHLIDI  
LLYIARNVIKLYGFSVSLHDVPKLNYIEDMYKFNCCIAHYKLLKYNSNQNNNNILLS----  
YDELENIRIDNSKIIINEVIKRIGNVFKDDYLSIITMKNTRYKINDNELATIIGCTGQQGLDSNEIKPS  
VMGRIFDFNVPGNIDMESLGFIKSSTLKLGSFAEMCAHAYNSIKKILKITCETSSAGSTGRKLVKFMEGI  
KIDHYNRAVLNNYVIWQNPNYRMIGGDMSRINILLPNNKMHNNEIMEIYNIKIYLVGESFTSITKET  
VFPINIQAIEIQSDNDNELSNDELINIINEYVEKVKVESFFYTQKMDIFKYVLMTYLDRYTVKLTSLLSY  
IFDKINIKLLCSMSPGYAIGFEYAHTIQEKFTQQALSAFHTSKKSGAVAQLGFTEFKDVELSKNKPDI  
IANSLHKLEIIKMQLEFVCLKYFDPVITILKEDNPYLDINVINKNYIN-  
NKISYQYINMYNNFLNNCNIISSY--  
WITQFNDPYIDVIVKFKPETEINSLYFIESLPGAVGKGNFNKNLKIPIKYDFDLNEQDYSLQFYINSI  
TELSRFDTRDQVIMNQWFAYELFGIQAAYVIRNRLVESTNE--  
RSMEICYNLLAKLMCETADMVSIKLRDGNKSIKHAHGNQDAIVNAAYNNILDPAKDSYSSLFLNKQP  
ELGASYYKPYLNLNRYDSIKELKEEEVNIKSIEDFMENINSIIDKFWQFYST-  
PVDNVHNEIELTYLFDNLLLLSNIAYTETKKKLQLEYIIDKSIKLRQRHEYDYPN---  
FEITNTYMIQKL-  
TNQWTIKKLINKIEENEFIIAHNTEKNMIIPPKLISNVTIHILSIYFIINGNVVEFKLKGTLGAADNN  
KQTYLNNVLTQKFTSYIEIEIL--  
KLSKDEFYRDITNAFRYIYSINLNNFALKISPSVKT FMLPFDSLLMDKSKYFLT SKIDGEVFTVKNG--  
ICDIVLYNFIFKKQTNIPNHIVMGFGEYKKNKTIYPFVTEITDSKYNTRYEMKFYNDNIKN-  
KEFDITFHKPIPIEK-DIVNEAIAYYKSLD TDGVI LLD---KESNDYKLIKIDNTVDVIASLTHK-  
SPNKIHKDG-  
IYMTFNLYMDEKNITELLKVEKSNITYDNDINMLKFKNIHNRGKNILYAPLCCIVEYSFKSKIVNIRL  
DKTTKFFKSNYYGNSLKVILDTFHEKTVGIDYLYTMFKINNEIYD-  
KKNLILNQNV EYFKNQQRPLNIFTNLIKTEAISIAASKLCAEIPN-  
RHLVSLIDIGRGGDINKYYYIGISMLGTD PDISALSEAQERYNSLQTRKRVNSYKFSSLNISILDHDYLNK  
VKSTYMTQQFGLIEWQMAIHYSYNVDTKNKILNILKNLSTDGTKVIITCLNGNKIKNLLINNQNIIKYKI-  
QDNIYYNISKVNDDKIKVLYDATMTTWLEEYLI-  
YDTIIEDFNKYNFILDDMF EFKDIYNDAMLVKTNSLFP RKATSVFYKNILNQNT-  
KDNQVLELMNLFKVYIFKYKYKTDFTKQEISEAANLIKDNDSIKCLFSKYNQIISNFKILKTKINKCLN  
CGSEEVDIILLTKYKTQG-FCSVICKDNICKQVYVYLYIPKYKYLTYSVPTQLLKNVD-  
VKTMINLKNKSNVYGGTTYDSKNKLEYFTPN--  
>Mytse  
MKRSCI--  
AYSKIDSDRQNIYITETKNGKYNIPQQFICPCTFEDYAIASVTDNKLEGCNFGLNITLPEIKGIGGVRY  
QTDFTYKLIIEECIETIDNTI IKTGLELMDFNQKRKEYSNYIGNNIDMCTFKYGGKCSDDIIFPSKDIYFP  
LSFIFDNSNPRTCFRLPETKLQIKIKFRPFSSILLPDAKYKKHSLITDVDLQPYIKFTGYNTCGSPHKHR  
YIEELITSTHQSNKKNYYPDFLSITNILWYSRTFSGNMFISYDPY PETEENFIKTFIDKIIPDLIIISD  
NKSRGFNEKCKFKLKPDEIKFDNNSCIINIMNIPETHDIYYHTNILSFRRNNPNEYNISKKFNILGTY



IPDEDKIIIHEIKHTINISDISIPINIWNADENTATGDLRSSKSKKNDIYVDDPFVFLDFLSKLGIISR  
SISSANESIIDAYFPSDCLYSSTSTHSNPSIFLYRFNLHNIFVEPSRLIADVGNFRCVNLAVDWKEFS  
EVDPRSLFNKKLHICMTIVKKISYDNNIISVHTLE-  
MNDIVYLQKSLAVGSKYDDKNKKLCKKTVNKIIDCKNSGNSLDEYHEFILDSTYFKLFFDIDY-----  
KTSNDHQNDITYISEFKEFISYNINKVDNDKDIVDIKNDIYITLSNNPEKLSLHVFFNQLLVTPKSFVTL  
KKYINNLSKSTNNLLIHNIDLAPFRKYTQLRFIYSKKN-  
DSIYYHEYNYNDDLKRYILTSIDINNKHIIIESKIEYDNIIPESFIHNYIDVKISTESQLFKQKHTATN  
ETIDIDLVFEG-  
RTCSFCGKTLHKNGRFVKFVENIQIIRGNSSNCRILSYYPRLGGFELADFIKDLDIKKIDAELYVFWK  
NGKWKIDSPSLFQGITKSVLDNNKNNHDEYMSNRFNECKNRIMATLLNTSELCKNPYIIQFNNGVYDI  
SSKFYEGDDAKPYIRLHNIRINYKNIDMVDEQIFDKNYNLLDTFNYIPENNPCRSVFANLSSVLHYCHK  
PIITIFHGPASSGKSTIKALIRQLLFDMFIDIPIEFYQTNNSNGPNAWLKVEGKCVSFASEGEMGGDDK  
FLAKNIKQLTEPYINGRDLNCSKCVQKNTLTQFIDLNPPIFSSVDAPVSKRIAIVELNHHTHFNEKLETI  
NITSGNIVTIDEKFDISKIINNEFTLPLFYILKKWSNKHKNIKLLNTPDF-----  
-----FNN-----  
MNKILEDLRNIPNNISQILPHQLATLDFLYQKCINDLSSVLLFHKMGSGKTIISLLFSIIVCNIAKVIIV  
LPSYSILEMWWKQNLRYSLILLNKEYNLQNIIEFTTRTDISVMGK--  
TDIINEKLNKYNDYIMIIDEAHNFFGNMTGVLSTLRKNTNIIYILLTGSPITNTVSTIKDIVELLTRET  
FDENKYIIGGNRVFEKSINNEGITFLNKNLKGLISYDEERKDIPEVKYRGKKIFLCPLTLCPMKLEHEE  
NYEVAKNIKNDMFIKILMSVSLVALGSITNYENFSQFMETDKKIFDNLYISNGKFTGSELVDLNISSKL  
KKFRDITISERGKRFIYFANSTIGSAIIRSVMANGISEYGKEIVNMFACVCIKDKRFVIITSKNSNYINN  
ILSIFNEDNDDGNNIMFLFGSKIISEAYTLKNVKDIWFLVTPETKSELQCVARAVRSFSYKIDITKVI  
RIIASTTNTLSNDVSKTIEQYKVDLSTLSYDFRKQLYSELKFEKSKVADNIFKNLTISEDKIEPCVLECF  
VLEKIRRYCYNSRFKFNKNIKNIIG-  
NSYNLVEKYVDYAILSSFVIENKFGNRYFKDDVTVKIILEYNNHLLSVRL-----  
IEIKIFNWYIIPSSLEQFIVCKCKNEEIMYIIFDIHNYLLCDRELLESNEILKKNIDDFKIITNEVTQY  
NFKEKINDKDLFLTPYKIKPHSYHNFNQYRWFYVLNKEIPSGSYMINKLQHIKTKTFYCKNASLFSNP  
ISNKYLPVTRVSIIDIECQHGFEPPTPKDFPISHI-  
CWYKESIKPKITLTNYEIIENNEKNRFIFDVEKLENNNVYINIYCSEKYILHFILYALVKDFDYILTYNG  
HNFDFKYIQDRRLKNGTKLLINAIEDMDIKKH----  
SYNQDTTYEIHSSNGIIFLDLYNYTKKFYLNLSYKLGKSKFNIIAKIDNDNEIVKIDKNKIKINKFY  
DVIRTANYCFINNEPYIKNKNIIKNNESIKNAYNKEFTINEIVEVMLSKDDVDIGDITYDYTKYKADDI  
AYYCVHDTVLCNCIFKYDMIHDIRIVAFSNDYLLPHSKAFTYKSSNTMTGVLLKTLIENKTMIIISGNVDEA  
YDGGVLVLPKEIYIRGPTAVFDNFSEYPSNISEANLSPEKILKIILEDDEYALEIVKKYLEENYPYPDYC  
YILIHDKIKKTNKYILVDRREPGIITKIIRVGMQEKQNKQLKNNNDNILHNYSSALYSKIMINSIYG  
LLGSETFLFKSPAAEYCTSLGQKCITYIKNLVDNSKYNNILFNNQNPFTNKPIKTIYRGNLNVNFFRI  
VYGDTSLSFINIKFDDLKADECFKFLSNIINNEILSKNFEFYESMFNWLIMPAKKKY--  
IGEIVNNDPLVSYTTKGMALVRRDCPVIHKTILQKTIDILKESLINMKN-  
KNVEIKLNKYVLDVFRRIENQYLDINYIRSVKYSNGYKDPNNYELVKSYSRNPKNIDKGQRFSEFIYGH  
VVKKWNSKTLDISKHMIILEDYLKKNKRICIEKYIKDILTNEQILDNKNIIINVYNNMLINYSNP----  
MVYIKLSKNLYKLFKSKIKSNEILVFDTTKDIMDTIESSDLNIIICPIFLYNKTDKVISNIN-----  
TNCKFTLREQLEIINKININSNLLHSPLYISIVPCGFGKTIIGIDLICKLYKCVIIVPRKFIQWKEK  
FEESI-  
IFTSFNGRKEAIEKIKNGNCDIFICPDKHLEDDTIKSYIYNNFSMLIIDEAHKYNLNNNISMTRFLYNGI  
FKICIFLTATPTNMAMINENIVITDQNNITKRLIFENKFNKF--NNKCQQFINKIS-  
NNNFNVYIKNCISLDNRNNTIMELIKTSVNT--  
KGLILTDYRTHMYIYNLLKNTTLKDIIYMYDVKDKNCNLLSNLKNKNYLIISTIAACESLDINNLNTF  
HVLLPITNNKTLTQCIGRILRDY--NEDKLCVYNSYINNIKTYINDNTMLIKKSLSE--WECSEK-  
MVSEFDYNTLRKPFNMAVMGKTGSGKTTFLKNLKKIGGHFKFIYLLITSSEVNYHYKYIYPNHVYFLNKT  
NIKILLGYLKKIRNFSYNKDLIGTLVIFDDIGKE--

TKEKLENFTNECRHSNISNIFLVHRLEHLDTTTRDSITYYV-INSATENLDYMQCNKTIK-  
NEIMTDVINTYNENGGKGLYVIIH-ESIVYTSLIKQEDIDNKKDYVFCTESYIKKFISE---  
IYEINPQVIFLFDENKNVKRTIFLSKDSVIENSFVYYYYLSLNNTKLTQPEYVNDHIILSFNIEQARGYIK  
NLLQIDENILLFSIWHNLDYYYNNNEIFDPYNIKNLLIESTDKILYMIYLDITDVFVTTTNEYTNTSLA  
RDGMYQEIIISNIYKNKYKSSMVKE-SEEYSLTNNFDDIIK-----  
LSNINKYTKTLCIGYDFYIKGDKITIDNTD----YSEVSLYIYIDENN-  
TIKIVNDTLFAEKLNYFTDILKEEIIIKSNSPKSIIYIYFDTFLDSNINIYQDLKFFLNVTNTRNIFIDM  
SYKINIMTSKNHISYRSFNIDTKLCKYLSLLILGYNHIFNRIQKHSRLKKIDELYPSTRYCQNYKDVKRQP  
VLIDSIDENLIKISDKYYYVGREDDVYIDDNGLKYQCSIY--  
YSNIGFLNNIYLASGTCYPCCYSKQKSRDEIFESC VFNKEILEDINPIIVNYGRILSKNGLSKLSPKLNN  
ILNSNSKIDIIKHTNRIDFADNYTIIMAYQ-  
PTITIRNFDDMYSFIINNNAIVVNDNIVYTDKILKMNNIFIIIQNRIHQKINKQSKLDITVKIKIKIL  
KKYFNINNTNPIVENGISVTDDICKIDGEIIVNKNIKYFTEYNNISLKPSTSEYFKQYFDTIYTNNKLF  
IKIFITKIMHIKIKTDYSKEEKLNITHKQISTTEELICKYCNSFNVIKHKDIYSCDCSNCYTTSSKRTTI  
SSPSNNTIHCNNVLKEISNISITFEIVEKFRKIVESNNLNKNSITTALGSEYLSQGIKNYRTTHKLIN  
ICNGKPLLLSKENIFDINIIFEDFIQFIYKNNYNRTISYEFCLDKIFAILKINYVINFNYNKLNKRDDKP  
EIWNKYKIELYNKTRNINKFPCNIIKNEYQKPLLRNMQDIKNMYLFPNNVNIIFQSYIDFEYVKKYPYN-  
-  
FLIVLYPVYKLYWKNTYICYNQNTNTIYLGQEKITSIELINEYNELYIISNGVKITYSAYAYSTILKSSI  
RLLNIDQILGIVESANKLGLSNRKFNETENI--  
FRYESNLKSIQVDVQLKIFDLFITRSDSIVSGGTGIGKTSIIPKIIWWFNFLFDGYSIFNFDINIIEKNT  
LLSLPRKAIINSTATNYIKSLGYENILNSPIIIKYKDIKLSKENS KPRFSTLLISVNRLTVNNLKSSSTV  
IIDEIHEHDYADISIAISYKLLKIRNIILISATIEYEIDNITRFFKITQVYIPGFTLYPITEI-----  
-----  
ENTTDEISDILLYTPNGYSVIIFCESVNIKIKSTIEQLKLNIPYKFYEIHGKILDVNIKIYYIENKKYIHV  
IVSTNYLESSITISNAKLVIDNGKEYRKEFIDGKVSYITVSMYKQQRKGRVGRVSKGTYYRTYTLKLSFK  
HINYQYLWDYIIIFKYGLDVKNDFVIPPDDLNRVNNTIYYMKSIGIDIDKIYRIFNKYEINMLEYFIIY  
LYGSNEILSTYDKNAIIPYKLYNIYIKMNVKLLKTRFKF-  
NFFCIFTFINKVYDGPNTINDIVQDKFFYLKSENPLVISIEEGVANLFLQNDPRDIKSKVLLNVELPFK  
NL-  
NYDLPTLFRNEEVIKISKSGNEEVIMKINFEGKEDSKKSYIYSSLDNKGFTYISISISISYRKNTSIDNK  
IEYKKISNKTYSHTEIRIPQYISHGGNTAECDNSLTQSNPPGGYFNVSLSLKKMVTTRIEQTYVYPKRKK  
TKAFTYHLAFISKKPSFLMPPQFLTLIDIDFNIDKIKCVIDSKKTFIQIDVIALIIALSNDNIDVVYDKIS  
SGFNKEISDSIKILVENTKNILAEYNGDARKYVDKIIETNYLKKKNEISLQDYFNDIFNDFLPHIKGNFK  
YKCMYIISILRQSFVSIFQSDVYPDKDNLATRISTAADIFENIIRTSIDNSFELARDKISGSSKNNNIN  
NILTQVKLLPQITQAFNNFFNMQDTKNSDVVKIGTHSNWAESIYISNAVG-  
SIELTKSLAQRKLHASSINVLDMMDTPDHGKTGLVKRLCISTIIITHYPIHIREELFNEVKKYIEDNKN  
KKEDEINGVISIIDEVIARIKNEVENFIKEFRHAKIGFFKRNDIGIEILKNRYFQIRINVGKRAIPV  
FRVENGELIFRKYPLKSYIDKSNSYDLITKYDYDIEIIDVVGQSIYSNICDTVTEFDSYDKKQRMKYDY  
VRFPNYLYFSYLTSCMYDIGKMTGVRGTFGTAQSKHIITGPPDNIMNKYDTCNYLAYERPSITNIPMEI  
SGIANSIGTHVLVGGFFSFN-  
YNVEDGVIVNRESINRGLLSVISLISVKNELSDTQINNNNPTPENSYSKITATGLPSIGTVLVQGDALYR  
CLKPKFKNDNRYIFDQSETLSNTYPAVVERTRKQGTDLIKIDMLLSSYRRLSVGDKI-  
AKSVQKVTVSKIMDEKDIPYNERPDIIFNSPSIISRKTLPLYDEVSLCNMFSKIPYNDKGDVQFVNY  
PIYTDKSPQDKYFIKNEIQKIYNNLSDEIDDIIHCRQILYHPYTKPKKTKAFMGPMFLCRLSQMSAD  
KISVRNRGRDLKYMQAPS-  
GKKKGGGIGIGEMESDIFSTNGSVYALHELLSDPDEFYLPANICSNCGIFATYEENIQICLQCENLGLSP  
IHKVRLTYAIKIFITLLNARGISLVPIKPKNNIYYVSNINK---  
MTTFKYTLLDNIIIDSIPVIDSIGDNE-  
NSVKSPKLGKTFNVCSTCNLTRENGMGHPGRTPLKDICIVKPGCIKNIIDTLNLTLCNNCFMLKNNTLFT

TILEKYNESINLKREILNGGIKCSNINCQNITGTYKYNNKAYFYVKKQKDISNKSITMLNGIPDIIYSY  
SDSQLQPSKAFYVNNILIPVLPSPRPNYF--DN--  
KESHVMTTKLQGLVGTSSQKSKDESEVQKIYNDIDNVKPNPYKTSNVTLNIQVGGKGSIVRSNIMARRSDN  
TARCVAGPTMD-  
KIGYIYIPKSAQTLTSSIIYNNRFTENIIRDLLNDNIKYILLYRFDQLLKIKPQSRINNLLKMRYGDRIE  
VELDDNDIILFSRQPSLHKFNIQAGICKIWENNTIATPTPIANSMLDYDGDEMNIYKPKSSMA-  
IEPIFTMLSVNMVKNYFSPVFGLIQDQIISVHMIYNKEFSLQEVIYILGEYSY-  
YIRDNKKTYSGKELLSLLFPDNLTYENMFKNGEIILQNISSKQVVAQSYFSNLSHLKNNIYAVYFIDV  
ILYVARNFINLYSFSVSLKDIPNIYFVDEIQEYVNCCKVIQYMASKYY--TKKDHIMKLT----  
YDEMENIRIQNGNNIINNVMKINDLKFNEKLNAIMLMKNSGYKITLDELVTVLGCTGQQGIDSDDIKPG  
IMGRVFDSTLPSLDESGLFVKSSTLKGSLFKELAFHMFNASKKILKITCETSSAGSIRKLVKFMGEV  
KVDHLGRSVLNDIWIYNTNHKIMVGGDISKIEILKPSLEMVNYSIINKLYNDNKKYLLNFGTEINKEF  
IFPVNIKLELQSYSKIPISETEALKIIDEFIEYVYVNIYFYNIIDMTWFKYTLTYMDRSTIIYSKEIINY  
VINKIKLKLNSLNPGYPIGLEYANNIQEKFTQQSLSSFHTTKSGTASQLGFSDFKDVELSKNKRDIV  
TAYSIHKLEDIKKQIEYLSLKNLNPINILEEEDEMVM-ISVVIKYYIN-  
DKISLYHYLQMYIEYLENNKIIGF--  
WIIMLNNNNINVIKIKIPYSINKIFMIKSIPVSVSKGKMSNINLEIDVIYNDNLEEQNYTLKFYIDSV  
SDFINFDTKDIHMLGPWFTYNAFGIQFAEYSIRRRLLVSSTKE--  
KSMEICYIILSKMLCSSEMYNIKRIREGKQNVIKTAIHGSSDAITTAAYNNVIDPNNDIYSQILSNEII  
KLGHGYYDCYLNLRYSINNSVTEQDINIKSIENFMSEINEIINKFVKFYDNITNENIKNEVELTLINP  
DLMLLSNIYNNESKKKTYLEYNLKKKSKLRQRHEYDYST---YEIPNSHLTDRL-  
TNNWETKTVIDEEKIDEVLMRHNIEDNNEIPLINDIDRISVIFVSVYIIDSVLIEFKIKSYIGPLSSN  
KSTHFNDIDTSRKNISYYLEIEILNIKLENNILQEKLEKAFSYIYKSTNISNLSLIEPSRIKFTTIQYNK  
LTIDKDSYVMAIKIDGNVFTVKNS--  
ICSVIIYVNIYKYKCNIDKNIIEIGMGEYIKNNKKIYPFYFTEIVNRTIENRYDQQFYNSIITSFEPMQIK  
FNKLTLLKFNENNVSTNVVNFYKSIDYDGIILIDISNNKDKDYKFKIDNTVDIVCRLTYR-  
GVYILHSGGKLHISFSLFADDKNFAELTKYTVKSDIKYISDANLLVFNNNDK-  
FGPSKLLSPIYCIYEVSFHSKIIGLRIDKTNNFYRQNYNGNSLDVILQIHEQNYNIDYLLSLNESSNII  
DNPRSKLLLNNKVDYFLDNTVRTSINILTNMKTNAISMSISRLVTVLPN-  
RYVLSIDIGRGGDLTKYVVYVGISILGTDPTIAIQESRERYKNLQLKSNAQSYKFHTLNISILNDNYEND  
VKQSFMNQQFGVIEWQLAIHYSYNNNTKDSILLKLNLSNGTKVIITCLDGNELINRLNINEHIIYNI-  
QPGITYKITKISEDRI SVLYNATMTNWLEEYII-  
TDGIIYDFAKYNFILHDMFTFEDI FNKNYTKTDILSNFGRKSTNMFYKTIKNSNYNNEDINKLMSLFKV  
YIFIYSFKTDITDEEVAESARLIKNIIEYKNKCIFSEYKNIKCDFIITNTDSNL CIYCNIQDIDIYIKHIN  
GIKG-  
FCSKLCRDSISKQIYTILPIYKNSYLIPYELVKDKEEFISYINVKNNDNLYGGYPLL YNKKIELFTTT-

>ASFV

ADKIIILQDLLNSSNIKNVNSYGPDPPEPTLYVPVGFYKVRPHFGIPQYGDFFHDMVGHILSWQDAPI  
QGTAQMGTFRNGYDWDNQTPLEGAVYTLVDFGRVPVPGTKNAYRNLVYYCEYPGEYENVRFVNGNSLDE  
YSSDVTTLVKFCIPGDKMTGYKHVQEVSVETSGPLKPILTDENSHTNPKFLSQHFPENSHNIQTAGK  
QDITPITTYLDIRRVHYSNCGPQ--TPKYYQPPLALW-IKLWFNNLAIPSVSIPFGER-FITI---  
KLASQDLVNEFPRQSRFPSPRRNIRFKPNEISLTNELYINNLFVTPPEIHNLFVHKQVTHNTNNHHDEWP  
IEYMFILKPTWNIISDQNPWHKFGHVVNIMQPTHAEISFQDRDTPDACSSISDISPVTITLPIIKNI  
SVTAHINLIDKFPKSF-----CSSYIPFH--YNAIKTPDDPGAMMITFALKPEEYQPSGHI-  
NVSARE-----  
FYISWDTDYVGSITTADLVVSASAINFLLLQNGSAVLRYSWHDHTILLTREL SAFLTPGSKKTNIINRI  
T---GKTYLPSTELLRLYEHLEQCRQ GALMYFLELDYDLKLN TNAVPPLEPPALSRLCHRI-  
FVHKN-----  
EGSHIHFFFTLKPEVVQGYGFHVLIPGLKLAASKSIIIGSLQGVANPESCSLLYGLNHKPYQLKTGFE

LVFDSSDPDYIPIHI-----  
KNIESYLVSLSLTNEQCAADIAEEEEIPTDSLPEARYLKILNLLPPEYVEYPLWSNVVNTSANYRPLAEW  
SQCPEKLWDASRHEKKITKRSMYWAHKHAPQQYKVEVYNGLEHYMIAKVIYAMMVVDVDSNGKYVWF  
EGEIWKWRKESRVMRITEHIKYHLSQPHENILNYKAFERSKSKI FND SKGVI RLDTNPHLLGVGNGVLS  
ITNHFHEHP-IHQYTHICYVPFN PENPWK-----  
LLNALQDIPELDARLWIMFYLSTAI FRGLKEALMLLWLG GGCNGKTFLMRLVAMVLGDHYAKLNISLLTS  
CREAKPNSAFMRLKGRGYGYFEE--  
TNKSEVLNTRSRLKEMVNP GVTARELNQKQESFQMTATMVAASNYNFIIDTTDHGTWRRLRHYSKVKFCN  
PDP---GNPYEK-  
KEDPRFIHEYIMDPDCQNAFFSILVYFWEKLQKEIKKVFCPTETEAYRKSQDRVVESPAETVYLSEVV  
TAYAEWANIHLNSLEKYLQHKFETLQPGESYIGVSAGTLLTPKNKWE--  
WSPNLSAPDQKLIRDLRAYASPFPSIKGLQLHNAQLFVQNFQNPNTPLLLNWQTGTGKSIAAIAIAIFVV  
GFTRAI IQTEMLRPELYGYKEFASFNITGEEKNFDVLSLFHRSDTLNENQKISEAETNGLIRVNQKIMI  
ADEIHNVYNNNYGYVLD AFPPHQAPRAVFMSATPVTGSVMEYVDLLNLLVPRHEL PNGQPLQRQQLFDVK  
WKKDALALVERLSTGRVSFLLDTNTNFERIFAG-  
KMSLYKFI ECPMSEYQLETLKQLPKISSNSIYDMVFPNPKFSKQTEPNSTETPTALMASTDWLL ENFNVS  
GSFSLSQPPTHISYSGKYTQMMKD ISIIGKILYHNRVRMGV LILQEILQSNGILNEVSSPVGTTTRCSA  
AIRRFTILHSEIEPAVERSLALFNASNLEGHQLRILIGSKVIVEGLNFQAVRYEMIMSLPLDIPRLIQVF  
GRVVRKNSHMELERNVTIYLVSTTPDELAKYAQKLKEYILIQGDMLPANVGATV LNTFEAQEVKTISNII  
ISLSEWKAVSTPKLIQGITIDNLISLCYSKNQVPAKPLYVAAVLNKKEPLDIETYIRDFTKEPFQVLYEK  
FKQDFFFFSKKDIQFPDIFEIPLYMLNINVKRKENDIITQRVTNLLQT--  
NAPLLFMPIDIHEGAYTLFMYGSL ENGYKAEVRIENIPVFFQIFNFKSLLTAEIARLETLRPVGREKEK  
EAPYIRIFFKLYEQRKAITYLNNMTAADTTCCYRMEKLP LTSQHYSYEPRGVHRFSVPEDLVSSIVMAY  
DIETYSPVKGTVPDPNQANDVVFC-----MIFWIHSTEPL-----ASTCTMAPCK-  
SSEWTTILCSEKNLLLSFAEQFSRAPDICTGFND SRYDWPFFIVEKSMQ-----  
--HGILEEIF---NKMSLFWH-----QKLDILKCY-----  
YKEKISAEKSI ISSFLHTPGCLPIDVRNMMQLYPKAEKTS LAFL ENCGL----DSKVDLPYHL----  
MWKYYETRDSEKMADVAYYCIIDAQRCDLLRHNVIPDRREV GILSYT-  
SLYDCIYYAGGHKVCNMLIAYAIHDESTIARGKREGKYPGAFVIDPKGLEQDKPTTGLDFASLYPSLIMA  
YNFSPEKFV---ASRDEAKSLMAKGESLH-----  
YVSFHFNRLVEWFVRHNNVPDKMGLYPKVLIDLLNKR TALKQELKKLKEIHHAMVDAKQKALKIFMNTF  
YGEAGNNLSPFLLPLAGGV TSSGQYNLKYLN SIKHYEQLCHEKVL SMASTLCAEDNGTSYLRMAYEEVF  
PVCFTGKKKYGIAHVNTFIGIDI IKQLTKTIGTRIMEESMKNFEDFFSYVIVEKQVQFLCARFINENE  
FQPDNVS NKDEYAQRRAKSYLQKFVQSIHPKDKSVIKQGR CYKYVHQEIKKKIFADLYEFFNTTNP IEFI  
QSARFMIQYSDGEQKVNSMKKMEKKIVQLYNKGDAIHDLLTYIINTFQTKMLTFEFSSTHVELLLKLNKT  
LILAGIHVKKHLQALLDSYNNEPPSTFIQQAIEE EPSCYDGIYKKLQSKLQHDFGRLLKALTVTARALPG  
QPKHIAIRQETAFTLQGEYIYFPILLRKQFN YTTTRVSLRACEFPLFNQQEMVDKI--KKLSPYGRFY--  
LHLNTGLGKTRIAISIIQKLLYPTLVIVPTKAIQQWIDELTLLPHLRVAAYNNAACKKKDMTSKEYDVIV  
GIINTLRKKP--EQFFEPFGLVVLDEAHELHSPEN-----  
YKIFWKIQLSRILGLSATLDRPDGMDKIIHHLGQPQRTVSP TTGYVREIEYQGHPDFVSPVCINEK VSI  
ATIDKLLQDSRIQLVVNEARYSLHTAEP IIFVEFRKLL EFYQALSKEFKDVQIVVPEVAL-  
LCGGVSNTALSQSASII LLTYYGRRGISFKHMTSII MATPRRNNM--  
EQILGRITRQGSDEKVRIVVDKDTLSPLSSQVYDRHRIYK KPYSSLIWDPYNSIPELQFKAHHFID--  
TTVLYGPKTGKTVYVKHIMKILQPHIEQILVVAPSEPSNYEGFVHPTLIHYLADQNIDMLKTYHKL PVE  
CLKEQTDQKLLLILDDCAAE LFTKEIFKFFYQNRHCFISMIICQDDTDL PANLRKNAFVSI FTNASIC  
MSNFSRQSNRYSQDKEYVEEISHIVKYRKL VYIRED-  
RQHFYHSTVPLPTAKALKCAVYSKEVVIDKSNYWSKFNFLTNPLRVTLYNKDKEILQNFYLSQYVVG GDS  
DDLFFVEDSGEEVMPEIYRQHIFVALDIRDYKKEFQQVGG LNI DASMESQKDNIIHHIFVANTLVAPMRR  
QISIAMEDNYDLLLYLSPDAFK-  
LLVQSPLQMEKQYPALSPSLLL EQKLINFTYAMIKISPLVNIQINVRNVFDEKFSNKTFVPIRFINKKAF

ILTIQNGYFIRHDFNSVSTLNNFINTINMGPAAPRGGSLPLPSNEDIISISSMSVFTELKSRQISVRGL  
QQTGIYNFLFKKGIGPGRKMDINVAYLFDANAARWETIYGGRNIRIYHRVTDIKIEMFNITQEEFNYLKI  
LVNKLSQLHDKQGGKDLRKYDTQYWNFTCQKTKAVNRIAFLEPHQIADETIKEPDIFFYSLARQYYINGA  
GNMFSSAELANLILQTFVDIFDLVAICYDCVFFKDKQGDIEFEVAITQQKFLKNEAQYIFTEGKLNHRH  
NFCYFPIRLSSYIHDDIPIDFLRPTQIASFEWKFITLNFKEIVPSAVLQNIIVGFLSEDQAILYPLEEP  
YPQONKANKALYKFLLEFFDVLYLQSNSTRKIEFKTKITSVTEFYTKSDVDLNDIHTIKLQKNIFNDY  
TLLSPLQSYTYIEFYEDIETIGLINIYYSTLNRLIPVNHENYIHILAADILNLKLLTGLGVDDLQFLRPQ  
EISKLKYKCYCHTDMVFNTTQFGLCPNCGCIQELMGTIDETHFYIFNPNRHRYFWIEHILGRNCGTKVL  
QQLKKIIRDNKCIALLTVENIRKMLKEINRTDLNNCVSLILRTGVGPPQISESILLRGEYIFTEAIKIR  
EKVCKKGRINYPYIYKIFDAIRILQYIHLQGNDTLANNDSE--WESICME-----  
LEIPTDRTHCVHF-----  
KPTLLELYRLEPEFGGAIPSTLADRVLIIKSRTGSLPVHVFRIFQKYLGRSVICTQPRVLTAVTLIGATHY  
PDMIGVGHKPLTEKPNRGLIYATAGVLLAQHTMTDDASRYAFMIIDEAHERLGDILKSLRMLQRGSIGA-  
RIFVILTSATIDTHKYSTYFGIGKENIILVEGRQYGVETHWPALTIHKENIHDRPTEADFNMDLEKLPLM  
LILPEKPLRRVIVSTVVAETGYPEWAGGLITRPAQAQSRIEQRRVGRVFPGLYTKHVFEQIPAQQYPEII  
TEDMLDPPPTDALASAIERAIACTRGEKGLQLTQLGDIASRFSFLSEARMCFSGAAISDIATILAVVSA  
KKLNLDSKQRNLAEAVLGIPPGFQHAIVYFINNKVNNVAKHLREWCKLKYSSMVQILARREDILNELAG  
LNRLASANAETFLKRVCTLKQCMYCYDKHRLLYTGRNGIHFSYHDAVIKNPSCIVTPRIMLSPVSKQYME  
RLEPFVSVDEEFLHKYVKTHFHFSGKSFKELKMKPSQMIKFPETTLINMIPDIPKNVLENVCHQYSFKRL  
IYCETF-  
YTDMDVENSVELIGLLTNDFNKLYHLLKPDGFLIVYDHKQEFHLSLQDALGHHTIRHTIPWETIFKGFPT  
IFSKQPFIVKLRPQITYGPIETDNELTEADMLSFISAAFDDLMDNGIPQIFNVDITYKDQRDHTEQIQFN  
FTDVNIERPQHRPNKARLCLGSYSGPVNLAAEVILTAHYSNGRQEVKRASIPPF--  
QVSTFPIMRGSNRCHTHLSKTADPNEPGGYFIARGG--EWVVDLLENIRFHIHYHTMQGNIIRGEFIS-  
QPGGAFIIRYMTTAITIEIN-----  
STKFSKLRIPWYLIFRMFGMTGDDSIIEQVVFDLSPVNTFMIEILEKSIHVLDPIHEPNREKIIQFLSEK  
KFVSNKSDENAVQYLNEILDKILPHMQTARVRKLRFLGLLIHKILLVIMNVFPPTDRDSYRTRKRVHGSJK  
AFKAIFNNTSIAPIINGFKELAFEELTQRNIIEAFAALASDLNRSMESIISGNKTRORPIVRVSTQSNL  
LNTISALRTVNTTASNASKQTERADMRRVHASYPGYICVAQSADTGEKVGMSKQLAITANVCTLSLKQRL-  
LSDPAIQQLADVSNKDIVRK--GLRVFINGIGCCTN---AFELAQRYSRFRGKIVHPHTTIYWD-  
SMVDEVEFWLDVGRLTRPLLIVDNNIEKYNQYKAAEARKKGDKDWEKHKIPFIQNTRFLTLEDLVAQGIC  
ESIIELRKHKHDVTRRFTHVDVPQ-----  
AILGLAALVSPRVTYETNQGRQTGGWYCFSWPYRVDNRRFFQFYEMPLVKTIAHNY--VIN--  
GLNTIVAYMIYGGYNQEDSVIVSQSFIDRGGFTFYREEKVELESDESFGKPDPKNLKPYEKL-  
VDGFVPVGTVVKKGDIIIGKVAKIRGEKDELNKYIDRSVMYGFDEPAVVDVAVRPHGPNDEIFGLMRLRYR  
NLNIGDKMSSRSNGKIAALALPTSMDPFTEDGLQPDIVNPHSHPSRMTNGQMIETTIVGLANALQGVVT  
DGTALPINVQLLSERLAQEGLRFNG-----CQKM-  
FNGQTGEYFDDAIFIGPTYHQRLQKFVLDYAVASYGPTDALTGQPLDGKRSHGGLRLGEMEHVWVLAQG  
AMQTIIEKSHDSDGCI--SYICRNCGEPAIYNASHPICMNC---  
VQAIGMVDSRRSSIVFQHEMRAANVNITSVLS---PRVFQPA--  
YAEIAAVQFNIAGDNDHKRQGVMEVTISNLFEEGGIYDARMGTTDHHYCITCSHQKQCMGHPGILQMA  
PVL-QPLFIAEIRRWLRVICLNCG-----APIVDRYELPKRLIEAASSEGKQCY--  
VCKAVHPKIVKDESEDYFTFWVDQDYP-----  
QIIREIFSRVTKLGRSKNSHPEKLVKAIQIPPISIRPGIRLGIGSGPQSFHDINNVIQYLVRKLNIDRN  
LQTIQQLYYNLLDSVSTATQGGTGRGIVMGKEGRIRKSLLSQVWSISRSTICGNSDLHLDEVGYPIS  
FARTLQVAETVQHYNINRLMPYFNGK-  
RQYCSRVYKQIQSVHDI EGLKQDFRLEVGDILYRDVVTGDVAFFNRQPSLERSSIGVHRIVVLENSTFQM  
NVSACAWYNADFDGDMNLWVPWSVMSRVEAELLCSVRNWFISTKSSGPVNGQVQDSTVGSFLLTRNTPM  
GKNVMNKLHAMGLTTQTD CFANYSGKSVVSMMLLKQPINYQRAIRNGELIEGVLDKKAAGAGSSGIYHLIS  
RRYGPQALKMIFATQQLALNYVRNAGFTVSTADMLTPEAHQEVQEIIKLLLESEEINNRL-----

HGDIMPPIGLTTDFYKQLNALKFPDRILKPIIMNSI--  
NPETNGLFQMVATGAKGSNPNIHIMAGIGQIEINTQRIPQFSFGRTL VYYPRFALEAQAYGFICNSYIA  
GLTSPEFIFGEMNGRFDLINKALSTSSTGYANRKAIFGLQSCIVDYRRV SIDTRLVQYGEDGLDARQLE  
TVRFEIMLSDQELED FSRLLKDRDKYRQIFLNFSQLLTDVRQVPVNVASIVKNSSTSPFDEKSILQKYA  
MVKTFCKNLPYVFINNIQYLKRAMLIRIELATVNITCEQMSAILDLIRLQYTQSLNYGEAVGILAAQSVS  
EPLTQYMLDSHRTNKSGIVRQEIFSAKNPEVETNKYAQEIANSELIERLILQWHLLYVMPDFASDVE  
WMTDNHPLLQIRLLNKTTMILKSISLESIINSLNTYIMHSVENTASGIPIIILRESAFRRSTTRMATDEK  
IAVNVVDKLLNSTI-  
RGIPGIKNANVRVDQGLVRLDNYAIKTNGTNI FGAMLDNIDPYVSSIGDTMELYGIEAARQKIISEIM  
GDKGPNHRHLLMYADLMTRTGQVTSLEKAGLNAREPSNVLLRMALSSPVQVLTDAAVDSAVNPIYGIAAP  
TLMGSVPRIGTMYSDIIMD-----KYITENYKSVDSIDML-MSLDNLVARYQRCFNDQSTI----  
ELEIRFQQINFLLFKTVYLV AQEIPSTISHSI---  
RCIKKVHHENHCREKILPSENLYFKKQPMFFKFSEPAS-----LCKVSLAIE-----  
QPIRKFISSVLVRLKNTTFRVSELWIELTIKQLMGSEVSAKKTLLFDL INPDDEYLYEIEIEYTKADV PN  
HLMLTAYHQAI EFIASHILSSEILLKLLPQVKS-MTKADYMFYPPVGYVTDKADGIGAVIQDTQIY----  
VVADQLYSGTTGIEPLKPTLDGEFMP-EKEFYGFVDVI-----  
MYEGNLLTQGFETRIESLKGIVFNKAEMKPFISSADPNVLLKNFESIFIDGIILVEPGNNTNTKWKPTW  
DNTLDFLVRLVPEYAPKKGFSLHLLFVGFKLANCPGYTKLFPVTQRNQVQFQPSDFPLAFLYHPDSSF  
SNIVLEMRLKEINRWEIVKIREDRQQD-LKTGYFGNDFK-----TAELTWLN YMDPFS-----  
FEELAKGPGSGMYFA----GAKTGIYR--  
AQTALISFIKQEIIQKISHQSWIDLGIGKGQDLGRYLDAGVRLVGIDKDQTALAEV--  
YRKFSHATTRQHATNIYVDLAEPAKEISEKVHQIYGFPKASSIVSNLFIHYLMKNTQQVENLAVLCKLLQ  
PGGMVWFTTMLGEQVLELLHENRIELNEVERENVKFAIKRLFKEDILVLLPFSNGDFYNEYLVNTAFLIK  
IFKHGFSLVQKQSFKDWIPEFQNF-----SKSLYKILTEADK-----  
TWTSLFGFICLRKNNILYLSGITIEECLQTKKTTDDEAEVKLPSVFTTVSKWVT--  
HSSFKCW TCHLYFKPKFVPTYMRGLGNFCFSFCAASYVDVHYTPKRWEARELLNMLYRFFTS--  
QWISYIKMRKE---YGG LSEEAFIELHTLEESIS

#####  
#####  
##### original alignments for 13 conserved proteins used for Figure  
3 tree #####  
#####  
#####

-----  
-----  
NCV0G0022, major capsid protein  
-----

>ASFV\_9628189  
MASGGAFCLIAN DGKADKIILAQDLLNSRISNIKNVNSYKPKDPEPTLSQIEETHLVHFNAHFKPYVP-  
-  
VGF EYNKVRPHTGTPTLGNKLTFGIPQYGDFFHDMVGHILGACHSSWQDAPIQGTAQMGAHGQLQTFPR  
NGYDWDNQTPLEGAV-----YTLVDPFGRPIVPGTKNAYRNLVYYCEYPGERLYENVRFDVNGN-----  
SLDEYSSDVTTLV RKFCIPG--DKMTGYKHLVGQEVSV EGT-  
SGPLL CNIHDLHKPHQSKPILTDENDTQRTCSHTNPKF--  
LSQHFPENSHNIQTAGKQDITPITDATYLDIRR----NVH--YSCNGPQ--TPKYYQPPLALW-  
IKLRFWFNENVNLAIPSVSIPFGER-FITI---

KLASQKDLVNEFPGLFIRQSRFIPGRPSRRNIRFKPWFIPGVINEISLTNNELYINNLFVTPPEIHNL FVK  
RVRFSLIRVHKTQVTHTNNNHHDEKLMSALKWPIEYMFGLKPTWNISDQNP HQHRDWHKFGHVVAIMQ  
PTHAEISFQDRDTPDACSSISDISPVYTPITLPIIKNISVTAHGINLIDKFPSKF-----  
--CSSYIPFH--YGGN-----AIKTPDDPGAMMITFALKPREEYQPSGHI--NVS RARE-----  
FYISWDTDYVGSITTADLVVSASAINFLLLQNG--SAVLRYST-----  
>SGPV098

-----MNSVLIQSAKQLEQNEYESTD--MFGCPIITGTS-----  
YMPCLIHVESNGVEYMKATKQSEHPTTVYSFNINDKEINAFNKFIL-----  
SFEVSELHSNHPA-----YVPYFGFKLIKKVAIYDEN-----NKVIEIDGAT--  
LFSRALSKKDNISTSGYSKE--LNNFNINYTENLNNEKTYFLPSTQINVPLNIFYPNQ--  
DTFSTIKNFPSFLRIEVTVMTEL-----TNVMVYNPEATIFLAYEKPLV--  
NTLSIKKPVLGIVVYSVQNRSTNDEQYIINNY----ESV--GNYEDEHYVHGIDNVSHINFDVGN--  
LSG--KRFMVWAGHDQSESNWTNMYLKKLLTECIIILPNGESPVDVNDGNLS--PKAKY--  
QIMKN-----NKIELGNIKTIDLVIERPKNYSAWF-----HTNPLVFRENKTQST-----  
YNIVEKINFVHCSWNILQNNFV----FYEIDHQIT--  
IGDISVPIEIWVNTKSDEGDNRSVLCKNSDVI--INDPFFRGVDVFLNK--  
QRPIEIA TVKHGNETL-----YQSHLNACYYPDNFSRISFPFMTKGYGNI----  
SFCHHTDTAVCPNYLPSDHIRGRCQIGIKAVWANQDKSTPHYHISKKLIIQYGVVSKVSSVNK--  
RNITSILNSRTIIDEE--  
>u2\_Me1sa9631501

-----MNRSLI---LYDN--SNSSRLN-IYTLQCNEGNY-----  
NIPY-QFTSSSSVYEN-----GYLIYKITDSKLEG CNNFGL-----  
IITLPEIKGIGSIR-----  
YQSNFVYKLIIEFVIETIDNDSTVNTI IKKSGLELLFEFNRS GSKYSKIIGNNID--  
LCSFNTGYTAD-----DIIIFTSREIYFPLITIFDNQFINPHTCLRLFPKTKLQIKLK--  
LTDF-----KNVMVYDK-----IYLKNSLKNITNIDLQPYISFTGYNTTGSEIKN--  
RFLEELVLTQDNCT--TNCNKKIYYTPDFSSITNVLWSIKVDNFNG---  
KSFISYPNYPETEESFIKSYVDKILQD--LLIVDFN NNFYAKRKF DN--KKCKFVEIKPF-----  
DVVKHDVNNQCIINIKGIPEGMKLYY-----HKNILSFSRRNKND E-----  
YNISNKFYILGEYLEKEDRIY----FIDVKHDIS--  
ISDVSIP IEIWNAEENTSTGDLRS DKMKEMDVI--  
VYDNFIFGMDFISKDLGIFTSTLKTNSNETIHDINS DRPNYEFYLN SNCVYPVT-----  
PINDESYP SIFIHFRNQHSILLSEPSRLIADNDKNFRRISICINWKHYPDTPRSLFKQYMIIGMTIVKK  
VTYDNN-IINVHIVDERK-----  
>u2\_Anocu578887679

-----MQRSLI---NYNK--INSNRSN-IYVTETRDGNY-----  
NIP--QEFNCPCSIEN-----DYYICKITDNKLEG CNNFGL-----  
TITLPEIKGIGTVR-----YQTNFVYKLIIEFIIETIDND--  
TNIILKKTGLEFLDFDIKQEHNYINIIGNNQN--YCIFKTGKFSD-----  
DIIIFNTCEIYIPLITIFDNSSMNPRTCLRLYPETKLQIRIK--FRPF-----  
KDILIIDYI-----KYRKNSLKNIQDVDLQPYIKFLGYNTCSDEF RN--RYIEELV----TST--  
HQSNNKKNYYTPEFSSITNILWYTKSDIFNN---KQFISYPNYPETEESFIDSYVNRILED--  
LIIVDCNLDFIKKRQF-S--ETCKFLKLKSY-----  
DEISFDVNNVCIINITNIPEGYDVYY-----HTNILSFNRRNSTNE-----  
YNISKKFYILGEYLLDEDRII----FRDIKHNIT--  
IHDVSIPIEIWNAEENTSTKDLRSKSKQKDII--  
INDPYIFGLDLLSKESGIFTRSLKSSSNETICDVNSDTVN LAYYFNCDNLYPIT-----  
TITNSSYPSIFLYRFNIHNILFAEPSRL LADIEKNFRCVNITIDWKEFPMDPRSLFPKCLIICITPIKK  
IIYDNN-IITTQILDAK-----  
>u2\_Mytse506497894

-----MKRSCI---AYSKTNIDSDRQN-IYITETKNGKY-----  
NIP--QQFICPCTFED-----GYAIASVTDNKLEGCNNFGL-----  
NITLPEIKGIGGVR-----  
YQTDFTYKLIIEECIIETIDDNVKYNTIIKKTGLEFLMDFNQKRKEYSNYIGNNID--  
MCTFKYGGKCS-----DIIFPSKDIYFPLSFIFDNSNMNPRCTCFRLYPETKLQIKIK--  
FRPF-----SSILLPDA-----KYKKHSLKNITDVDLQPYIKFTGYNTCGSPHKH--  
RYIEELI-----TST--HQSNNKYYTPDFLSITNILWYSRTDVFSG---  
NMFISYDPYPETEENFIKTFIDKIIPD-LIIISDNDDFLKSRGF-N--EKCKFKLKPYPY-----  
DEIKFDVNNSCIINIMNIPETHDIYY-----HTNILSFSRRNPNPNE-----  
YNISKKFNYILGTYIPDEDKII----IHEIKHTIN-  
ISDISIPINIWNADENTATGDLRSSKSKKNDIY--  
VDDPFVFGDLFSLKELGIIISRSISSANESIAEFNSDIVSIDAYFPSDCLYAVS-----  
STSTHSNPSIFLYRFLHNIIFVEPSRLIADVGKNFRCVNLAVDWKEFSEVDPRSLFNKLLHICMTIVKK  
ISYDNN-IISVHTLE-----  
>u2\_Amsmo9964436

-----MKRTFI---PFSKTNIDSDRPN-IYITETKNGKY-----  
NIP--QYVSSPCTFQD-----GYAVASITDIKLEGCNNFGL-----  
NITLPEIKGIGGVR-----FQNYFIPKLIIEECIIETIDDN-  
KTNEIIRKTGLEFLMDFIQKKKEYSRFVGNNSD--LCKFKYGGKCAD-----  
DIIFPSKEVYFPLMFIFDNVNMNPRCTCFRLFPEKTLQIKIK--FRPF-----  
ADILLPDV-----KYKKNSLKNISDIDLQPYIKFTGYNTCGSPFKH--RYIEELT-----YST--  
HKSNNKNNYSPEFLSITNLLWYSKSDIFRG---NMFISYDPYPETEENFIKTYVDKLLKD-  
LLIISDDENFIKSKGF-S--DKCKFKKIDPC-----  
DKIVFDVNNNCEINIMNVPEGFDLYY-----HTNILSFSRRNPNPD-----  
YNISKKFSKISGTYIPNEDKIL----IHEVKHTIN-  
ISDVSIPLSIWNANENTSTGDLRSIKSKKSDIY--  
VNDPFVFGDLFSLKELGIIISRSITSSNESIAEYNSDTVNIESYFQSDNLFVAVT-----  
PTSEYSNPAIFLHRFLHNIIFIEPSRLIADAAKNFRCVNLSDWKEFPEVDPRSLFNKELQICQTIVKK  
ISYDNN-IITVHILE-----  
>u1\_Nilcr115531784

-----MNTSIVNSFLGSRRAEAAKSKN-VFGVDPQETTY-----  
YMP--QYITVSGIRCD-----DVVRYEVKDQYINAANYFVL-----  
TVPLPEIKGVGSFA-----YAPHVGYKCIKRVQFSSQR-----GLIWEIEGEE-LFAASR-  
GSNIAACSGYSEK--LCSMSTGHTPN-----DVIKESELIYVYLRTPFDE--  
STISSLKIPANDKIVIEVA-FNRI-----SDVVIYDA-----AFNIDAF--  
AHGFVYQPDLSFIGYTVKGLQAKP--AYLQIPR----RVV--GSLNITSNSLGEVYSITSLSVYVKP--  
CYG-IENKFIAYPGFDQTPAAYVKAYVERLLFD-LLTVSAE-----RPSNF-P--  
PESDIVRIASS-----DIVTIQ-DIDVSVCIDGVPAGKSLYF-----  
HRNLLVFGTRRNGAA-----YNISKKFSKICGFYNDVNDTII----YTEVLHTVD-  
MLDVSIPVKLWNSERNIQAGDNRSAASKAKDVY--INDPFLKGIDLLGS-  
FDPVERMEVRFGEHELM-----YSEDFPISRIY--N-----  
RLLTSAIAAERKLIFNYTQCCLFKPTILQADHSRGKDKLHVKGKRLDVDNPIHYVDRQLVLACNDLYR  
ISYDNSEVKVSKIND-----  
>u1\_Canvi40556008

-----MNNSILSSVNSAD---FMKRTN-IFSFDVQOPTA-----  
YMP--QYISVNG--YYDRKDQNDTSHHHTISFDIRDQHISAVNYFVL-----  
SIELPEVSGEGEFA-----YVPYVGYKCIQRVIITCGD-----ITIWETDGEELFDKCVDDDIAI-  
MSGYSSE--LNDVSIQYTPN-----DTIKEHTTVVYVIKSPFDID--KTISSLKL-VNSKITVTVT-  
FRSI-----NDVIVYDS-----KFQAEKF--IQEFVYSPELHLIAYAVNDIKPKS--  
AYIEMDR----RLVSCSSTPAPIPVISDVYACSEVSIVYVKP--



YYGMENKFISYPGFKQNESDYIQSLVNRLDD-LVVVTD-----VPKDF-P--  
DSAMFLKVPVS-----GKITLQ-DVDIVVKIDNVPEDKDVYY-----  
HSNLLVFSTRKNSFV-----YNISKKFSTIIGTYSLITDSIN-----FSNVVHSIS-  
ITDASIPVSWSSQKNVYPGDNRSSHSHSKDLV--VNDPFRKGDIMVNK-  
TEVISRLELKFNDPI-----YTETLPITKIY--N-----  
KLLTGTRVNMRLKLI FNM PANIFRPTTLNANTKRGKDKLTVRVSVDIDPNNPIHYVAKQLVVICTDLR  
IDYDGK-INVTKITE-----

>u1\_Orfvi41057138

-----MNNSVV-SLVGGD--DAVRRAS-VFATDHRAPT-----  
YMP--QYITTQGVVDT-----TSDAVTTFEIRDKYISAMNNFVL-----  
SVDLPEIKGVGKMC-----YVPYIAYKLIRHAVNSAA-----DTIWETSGEE-  
LFDSCLDNERMELSGFSRE--LNDLSTGSSPN-----DVIKEAACVHAYIKTPFDAD--KTFSTLKL-  
SDSKITVTIT-LNPI-----ACVMVYDE-----TFDAAKL--  
AKEFPYSMELSFYGMVKNLCPRP--AFIEMPR----RRV--EQINHTTAVITDVHACTSLSVYMKP--  
VLSDANNRFISYPGFQQSEGDFVMAFVERLLED-MVIVSNC-----YPEGF-P--  
DTAEIVEVPPS-----GVVSIQ-DTDVFRIDDPVGMVFL-----  
HTNILVFATRKNSSV-----YNMSKKFSAITGAYSRATSRIR----FTTAIHSV-  
IGDASVPVGVWTCQRNVYNGDNRSPEARAKDLF--VADPFLKGVDFKNK-  
IDVIARMDVRFVNEVL-----YSENSAVSRV--G-----EIL-  
GKTPGVRTLQFNFTPSTFFSPTALNSNVSRGKDKLAVRVTTAHEAHNPLMYVPRQMVVVCNEVYRLSYD  
AG-IVA EKVTAQ-----

>u1\_Mo1co9629034

-----MNASIINSLIHAE--DGVRASN-VFGFDMHQPTL-----  
YMP--QYVTVSGVLQP-----DAGHPVVAYEVRDQYITAMNNMVL-----  
AIELPEVKGVRFA-----YIPHVGYKIRNVALTSVN-----GTWVEVSGEE-  
LFDSVRGHAAALELAGHSRE--LNDITRGDSPN-----DTIKDASTVYVYLRSPFDCD--HTFSSLKL-  
SDAKVTLAVT-FNPI-----SDVLVYDA-----AFDLDAF--  
LRSFVYATELSFVGYMVRNIHAKP--SFLEITR----RQV--GQMNLP TAVVTDVHAATALAVYVKP--  
YYGPVENKFIAYPGFSQSEQSYVCAFVERLLED-LIRISDA-----EPSGF-P--  
EAAELVEVPPG-----GLVSIQ-DVDVLVRIDGVPAGKTVFF-----  
HTNLLVFGTRRNSFM-----YNLSKKFSVIAGCFSPATGKII----FTSVQHTVS-  
VTDASIPVGFVSSPKNVYHGDNRSCSSRAKDIF--VNDPFLKGVDFLNK-  
AEVISRMEVRFVNDVM-----YSEIAPISRVY--N-----  
QVLHGACGTRKLLFNFNPGAFFRPTTLTANPSRGKDKLAVRVVYSSMDPNNPISYVVKQLVVVCTDLHR  
VTYDPY-IRVSKVSE-----

>u1\_Squvi549059696

-----MNNTVISSLMHTD--DAAHRAN-IFSVDCKRPTL-----  
YMP--QYVTMAGVTD-----VAPNVISFEVRDQYINAMNNIVL-----  
CLELPEIKGVGRLG-----YVPYVGYKMIRHVSIVSVH-----GTIWESCGEE-  
LFESVRS DPVALELSGYSRE--LNDINI GLTAN-----DTIKEAASIYVHIKTPFDVE--KTFSSLKL-  
ADAKVTVTVT-FNPI-----VDVIVYDG-----TFDIDAF--  
VRDFSVAEMS FVGYMVRTINNKP--SFIEIAR----KTV--SQINQSTAVVTDVHAATSLSVYVKP--  
YYGNTDNRFIAYPGYAQSESDYVSAFVERLVED-LVIVSAD-----YPTGF-P--  
DTAQIVEVPAS-----GVVQVQ-DAEVFVKIDNVPCGMQVYL-----  
HTNILVFGTRKNSFV-----YNLSKKFSVITGVYSSSTNRVI----VMNVSHTVN-  
ITDASIPVSWTCQKNVYHGDNRSDASRERDMF--VNDPFLKGDIFKNK-  
TDVIARLEVRFGNDVL-----YSESSPVSRY--N-----  
ELLTGSRGAVRSLRFNFTPSTFFRPTTISSNPSRGKDKLSVRAIYGTMDPNNPIAHVPKQLVVVCNDLYQ  
VTHETG-VRATKVVAEAPAVPRSQ

>u1\_Vacvi66275915

-----MNNTIINSLIGGD--DSIKRSN-VFAVDSQIPTL-----  
YMP--QYISLSGVMTN----DGPDNQAIASFEIRDQYITALNHLVL-----  
SLELPEVKGMGRFG-----YVPYVGYKICINHVSISCN-----GVIWEIEGEE-  
LYNNCINNTIALKHSGYSSE--LNDISIGLTPN-----DTIKEPSTVYVYIKTPFDVE--DTFSSLKL-  
SDSKITVTVT-FNPV-----SDIVIRDS-----SDFETF--  
NKEFVYVPELSFIGYMKVKNVQIKP--SFIEKPR----RVI--GQINQPTATVTEVHAATSLSVYTKP--  
YYGNTDNKFISYPGYSQDEKDYIDAYVSRLLDD-LVIVSDG-----PPTGY-P--  
ESAEIVEVPED-----GIVSIQ-DADVYVKIDNVPDNMSVYL-----  
HTNLLMFGTRKNSFI-----YNISKKFSAITGTYSDATKRTI----FAHISHSIN-  
IIDTSIPVSLWTSQRNVYNGDNRSAESKAKDLF--INDPFIKIDFKNK-  
TDIISRLEVRFGNDVL-----YSENGPISRIY--N-----  
ELLTKSNGTRTLTFNFTP KIFFRPTTITANVSRGKDKLSVRVYVSTMDVNHPIYYVQQLVVVCNDLYK  
VSYDQG-VSITKIMGDNN-----

>u1\_Yabdi12085073

-----MNNTVINSLIGND--DSVKRHN-VFGVDCHTPTL-----  
YMP--QYITLTGVVSN----DSPEQHVVSTFEIRDQYITALSHFVL-----  
SLDLPEVKGIGKFG-----YVPYVGYKAIQHISVSSNN-----GILWEITGED-  
LFISCRDNDTALKHSGFSHE--LNDVSTGLSPN-----DTIKESTTVYIYIKTPFDEE--KTFSSLKL-  
SDSKIVVSVT-FNSV-----SDIIRDS-----TFNYETF--  
VKEFVYVSELSFIGYMKVKNIQTKQ--SYIEKPR----RIL--GQLNQSTAVISEVYAVTSLSVYVVKP--  
FYGNTDNKFISYPGYLQSERDYICAFVERLLED-MVIVSHS-----LPKFF-P--  
DSAEIIEVPPC-----GIVTIQ-DAEVFVKIDNVPKDMKVYF-----  
HTNILVFGTRKNSFV-----YNISKKFSTITGSYSDSTKRIM----FSHISHSIN-  
ITDVSIPVSLWTCQRNVYNGDNRSECSKSKDLF--INDPFIKIDFKNK-  
TDIISRMEVRFGNDVL-----YSETGPISNIY--N-----  
DLLNCCVGGTRTLKFNFTPHTFFKPTTIVANPSRGKDKLSVRVVFSSFDPNNPPIYYVSKQLVLCNDLYK  
ITHDNG-VNVSKITGEQNT-----

>u1\_Myxvi9633724

-----MNNTVINALIGN--DYVKRHN-VFGVDVQTPTL-----  
YMP--QYITINGIVSG--GVSCDQPVTSSFEIRDQYITALSHFVL-----  
SIDLPEVKGIGKFG-----YVPYVGYKCIQHVSVASTE-----CTIWESSGED-  
IYNSCVNNETAMANSYSHE--LNDVSVGLTPN-----DTIKDAATVYVYIKTPFDVE--KTFSSLKL-  
SDSKVTVTVT-FNPV-----SDVIVRDT-----TFNYEAF--  
VKDFVYVSELSFVGYMKVKNIQPKQ--TYIERPR----RVL--SQINQATAVISEVHVSVTSLGLYIKP--  
YYGNTDNRFISYPGYNQTERDYICAFVERLLED-LVIVSDT-----VPSTF-P--  
DSAEIVEVPPD-----GIVNIQ-DVDVFKIDNVPKDMAVFY-----  
HTNVLVFGTRKNSVV-----YNMSKKFSTITGTYSVTKRIM----FSHISHSVN-  
ITDVSIPVSIWTCQRNIYNGDNRSEYSKSKDLF--INDPFVKIDFKNK-  
MDLISRLEVRFGNDVL-----YSETAPISKIY--N-----  
DLLSGCDSGIRMLRFNFTPHTFFKPTTIVSNPSRGKDKLSVRVVFASIDPNNPISYVSKHLVLI CHDLYG  
IHNDSG-INNVKITDDVKNK-----

-----  
NCV0G0023, D5-like helicase-primase  
-----

>ASFV\_9628179

MREESWEDHDTIQLTAQRKYLAEVQALETLLTREL SAFLTEPGS-----KKTNIINRIT-----  
GKTYALPSTELLRLYEHLEQCRKQ GALMYFLERQGTYSGLMLDY----

DLKLNTNAVPPLEPPALSRLCHRI-----FVHIKNSSVLP-----  
EGSHKIHFFFTLKPEVVQGYGFHVLIPGLKLAASKKSIIGSLQHDATVQKILHEQGVANPESCLDPHS  
ASVPSLLYGSSKLNHPYQLKTGFELVFDSSDPDYIPIHQI-----  
KNIESYNLSELSLTNEQGSVLRPVYCAADIAAEKEEEIP-----  
TDDHLSILMLHDPEARYLHKIL-----  
NLLPPEYYVEYPLWSNVVVALANTSANYRPLAEWFSQKCEKWNTGGKEKLEKLWNDASRHTEKKITKRS  
IMYWAHKHAPQQYKEIVEQGYFSILAEVVSNGMLEHYMIAKVIYAMMGNKFVVDVDSNGKYVWFVFL  
PGQPMNQGEIWKWRKEVNPDELHIYISENFSRVMRITEHIKYHLSQP---  
HETNILNYYKLLKAFERSKSKI FNDSFKKGVIRQAEFLFRQRSFIQTLDTNPHLLGVGNGVLSIETIPA  
KLINHFHEHP-IHQYTHICYVPFNPENPWT-----  
LLLNALQDIPELDARLWIMFYLSTAIRGLKEALMLLWLGCGNGKTFMRLVAMVLGDHYASKLNISL  
LTSCRETAE-----KPNSAFMRLKGRGYGYFEE-----  
TNKSEVLNTRSRLKEMVNPGDVTARELNQKQESFQMTATMVAASNYNFIIDTTDHGTWRRLRHYSKVKFC  
HNPD-----GNPYEK---KEDPRFIHEYIMDPDCQNAFFSILVYFWEKLQKEYNGQ--  
IKKVFCPTIESETEAYRKSQDTLHRFITERVVESPAETVYNLSEVVTAYA EWYNANINVKRHIALELSQ  
ELENSVLEKYLQWSPNKTRILKGCRI LHKFETLQPGESYIGVSTAGTLLNTPICEPKNKWE-----  
WSPNLSAPPEKEASPTP  
>u2\_Me1sa9631496  
-----MDKYI-----YLQGLKVKLLDKKCCILEE--EYVNQIDKLT--  
DELLEKINNA-IENNDSIEEYHEIILNEYHDRFKLFFD-----IEL---  
KKKYNSDYFDSTFENFKDEISSFLA-----  
SVFIEFYNINSTLELNEDDLKNHIFDGISATTSNDPNKISTHVFFTNILVSNVFTTLKIHI-----  
-----HNYKKRTTN-----ELILG---IDEQVFNNTLLRCIYSKKS-  
NSKYYHTEYDDQIESVNDLQKY-LVTFVDDDEDN-----ILIDTIDTDECELTVE---DGI-  
FPHLKVFNGHVFLFKFRQTLFKAS---ITIDSNTKTLIKNLETIEL---NQLDIYLQTOH--A-C-  
I-----CGK-ITHKNHHYLFFNQNNIQLIKYGNRHNCR--II-----KFEYPK-  
LDSTAITKFIKDL-----IVRKVNKDLKLYWD-----GMKWMPID-----  
DMIYGKIALKLLDEYKNTMLLHDKKYVST-----KYFKEAKVRILTDL-SDSTDT-----  
YNTNPYLIQMCNGIFDLKN-----  
NIFIYGIEAKKYIKPNYIPLSYKNIEEMSEEEYNNYMNENMLVTVINNIIPENHKDRKIFECNISSLL  
QISKETITFLVGPTKSGKTTIKLLLAALFGNLFL-TIPIIDYVKQHNPH-----  
SPNAWLKGLNGKLVCFASE-----SNACDKFDSQTIKHMTERI-  
IISRVLNSNEGQDQNYATQIIDTNI FPSIDITDNAILERLAVINIDHSYFINSTKIDSVNENILKDRNNI  
LDTRVIRPRPNPFSNKIENGDFSLALFNILKEWVRKYHLDE-----  
LKIIHTPEKFIKTTNTNKMD-----TPNEDNQNNKMLTLVSSINFNNTNKNI---  
KMH-----NIKCYNRYYS-----  
TIKKLTRSRKAIEIIVINEKFIKEFEHLIPNEYKKVILNQPYVALEHLIEPKEI-----  
>u2\_Anocu578887650  
-----MLKNSI-----YLQSGLCVSKEDKYNLWV-----  
NNIETSNVFSIGLDELLNKIKDVIDNEDNPLPEYHEFILEDINDYFKLFID-----IDI---  
DKKFNQTYVYKSIIIEFKEELINYFE-----  
SCFLQYNIQYIDIDETKFELHNYIHDNIYFTISNPNKISIHVFFDNIYVNENSFSLKNNI-----  
----KILKNNSNS-----ILIKN---IDINPFRKNTQLRFIYSRKS-  
DSIYYHKIYENDINTIDDLKHY-LFTYVDESPLH-----IKLLANSITN-KYDNHNNLDKI-  
YPHMVQFKGQNFSSLEKFLSDNK--IYLAEDERNI IKKLCIKL---GYTMDLNLDMLY--K-C-  
Y-----CLKKDKHKHNYLLFNAEYILLKRGKINSCL--PK-----IFTYPR-  
LTSYEISKFIVSLD----IIKKINNDIYVFD-----NKKWSKLD-----  
ENIYAGLALILCEHFDVLLNDRDYIAN-----RYFKEAKNTIKSHL-SLGYND-----  
LCNNPYIIQFRNGVYDIIN-----  
SKFYKGNDAKKYIKLSYINIDYKDENDMSESELQSFTKNYNDLKNINLIIPVDHKL RHVFEANLSSILL

AYYKQVITIFYGDTNSGKSTIKELIRSLLSTMFI-EIPIDNYTYEVH-  
KDSKKKIGPDWLGKVDDKLVSFASE-----ADYNETFKLSLIKRMTEPY-  
ILARDLRNNKCDQLNTLTQFIDMNHKPKFDGIDTAIFKRIAIININTTYFVDENL-----DEFII---  
ERASNNRKIIKRDNMLWNRIINKDFTLPLFYLLRCWVLKYHMAN-----INLLSTPELI-  
YNNDEKDNTTSNDDTITLTKFCSGWGLKKQDIRANARDYYDEEIIDISTGTYK-----  
IPIPFLRLRNE-----KSQYIDVKGHTPVLVLDHVYYRHPVRE-NCQWYK-----  
YKYSEIWDRLSEVI-----

>u2\_Mytse506497828

-----MNDIV-----YLQKSLAVGKSEKYDFVNNNIRDKNKKLCKKTI--  
SKFVNKI IDC-KNSGNSLDEYHEFILD SNNTYFKLFFD-----IDY-----  
KTSNDHQNIDTYISEFKEFISIEL-----  
YNIINKNYDYTTTRDVDN KDIVDFIKDNIYITLSNNPEKLSLHVFFNQLLVTPKSFVTLKKYI-----  
----NNLKSKTNN-----LLIHN---IDLAPFRKYTQLRFIYSKKN-  
DSIYYHSEYNYNIENVDDL RKY-ILTSIDINNKH-----IIIESKKINEYVDN-----  
IGIIYPHIKYFRGESFIHNL YIDLKNEYCVKISTESFQLFKQKHTATF---NETIDIDL VFEG--  
RTCSF-----CGK-TLHKNGRFVKFVENNIQIIKRGNSSNCR--IL-----SYAYPR-  
LGGFELADFIKDL D----IIKKIDAELYVFWK-----NGKWVKIDS-----  
PSLFQGITKSVDLNNKNMILHDIEYMSN-----RFFNECKNRIMATL-SLNTSE-----  
LCKNPYIIQFNNGVYDIQS-----  
SKFYEGDDAKPYIRLHNIRINYKNIDNMSVDERQIFDKNYNILLDTFN YIIPENNPCRSVF EANLSSVLH  
YCHKPIITIFHG PASSGKSTIKALIRQLL FDMFI-DIPIEFYQTNNSKN-----  
GPNAWL GKVEGKCVSFASEG---EMGGDDKFLAKNIKQLTEPY-  
INGRDLNCSKCVQKNTLTQFIDLNPNI FSSVDAPVSKRIAIVELNH THFVNEKL-----SRETI---  
NITSGNRNI VTI DEKFDSKI INNEFTLPLFYILKKWSNKH HKNT-----  
IKLLNTPDIF-----

FNN-----

>u2\_Amsmo9964401

-----MSDEYI-----YLQKSLNVTKESKIDLIL-----  
NDKTSKDLVKISISKICRSILKY-KDSNQPISEYHEFILD DITDYFKLFFD-----IDC-----  
KTEYEIDDVKKYIKEFKK FISY-----  
ELYNIFSNNFDIENHNIDNIKKFIFNNIYYT LSDNPHKLSLHIFFNQILVSPTSFIQLKKYI-----  
----INLRSKINN-----ILINN---IDLAPFRRNTQLRFIYSKKN-  
DSEYFHSEHDYNIENIEDLKKY-IITYKNFNEPH-----IIKAKDNNLTNLD-----  
VIYPHIKYFRGPHFIRNISKELYN NYK-ITISDDSIQLFKKKHSAEL---DEIIDINLIFNT--  
PDCKI-----CGKNSLHKNNRIIKFTEQKIILFKSGNPRNCN--TL-----KYDYPT-  
LSGYELANFIRDLN----IIKKIDSDAYVYWK-----NGKWAIVDN-----  
PYIFQGISNMILEKYRNNMLIQDIDYIIK-----KFFGEAKNRISANL-SMNTDI-----  
ICFNPIIIFNNGVYDLKE-----  
SKFYTGENAKKYIRLNYIKIDYKDIEDMSDEEKIKFENNYNILLKLFNLVIPKSNPKRIVFETNLSSVLH  
YCHKSVITILYGP TSGGKSTIKYLLRQLL FDMFL-EPPIEFYQNYIPKN-----  
SPNSWL GKVEDKLVSFASEG---DVNRNEVFLNKNIKQYTEQY-  
ILGRDLNKS KCVHKNTLTQFIDLNP KPMFSSVDPALVKRIAIVIEINETQFVNEKL-----SRDTV---  
NITSDNRN IVIADSTFDDKILNNEFTLPLFYILKKWSK KYHKDT-----VKLLYTPDFF-  
DKQN-----

>SGPV091

-----MFNYQNE-----IYIKPLKTSKIDPLD-----NKFEHTKIFS-----

SPD-EVY-KWANGSNETYEHIVSDTF--AVKLFWD-----  
IDISRDDLTKSDQETLESNPYMKILASLAIELGSKKKIFYMKKNGAVTKLTDLKEYNEAVLEMTNAAV  
VTKSNNDKISYHVIYPNFLVAPNDWCMLTKSL-----  
EGLVNSQINNKHSTSLKKNLLKA---IDFVWKEFPTLRCAYSIKSCEDTSVHTVII-----GTFEDS-  
LISWIPETTKA-----QYWLIPTHSEEAAD-----SVLDDPEITLLEKSNLYNQEVN-----  
RILTEVFGTQLEHYDIYM---EG-QTYQLDQVDYSCNPCPI-----CFV-  
SLHKNNHFCKRQGKLIISKHGNPKKCKRQVH-----TLNLKE-DLYLTIAVDIYSRN----  
DIKKYQEDHFIIWN-----GVNWSFDKA-----TYSITSYILRISSSIEDS--  
AIKKELQDY-----RKRKMVENNLIDLIGAENPIR-----  
VDSIPYVLYFQNGCYNILK-----DEFYEGPSAKEYIGSVNTGYMYKSAWDI-  
DEDIQNAMKDIDLIIQIQQPTEENKEERELEYEILGSCLYGSHKEYMTFFHGD TMSGKSTSKKIVNAAI  
GNFML-ETNSNLLTEVIDAK-----RPNPFLAQINHKRALFASELPN-TADSKFKIKGVNVKLTCHK-  
IISRLCYSNAIEQQNFATFIVDTNHEPFFDIVDGAIVRRCLMINFKSAFIDEKSR-----IL---  
VGVRKN--IFPIRMEISSRLETQAYRQACFLILKRFFRKHFLTPENTIFLPFKTTPEKF-  
KDFTLIRKIP-----TLIVQSSTETIEDILPKYSAKYDTF-GDT-----VY-----  
MEESDFKSYIY-----KHFSIKLFGNEIQNMINTHSHTDTS----GHIWVK-----  
YIVKKHLITYSEE-----

>u1\_Nilcr115531777

----MELNNRVI-----FVLKRIGVSREQRAS-----GNLNLCEFL-----  
VPELEEY-IRARPECTLFECLKNEEENSRRVRFVD-----VDL----  
REPLVAEQFAESFKTFLLLLTKFLAD-----FVFKHC--  
AASVSGSSKRAFLVAARSRYSLSLSDDPEKVSFHLIFDTMYTSVRTLVAMRRFL-----  
SREVRSSVN-----PLMRA---VDVAVYRRNPSLRVVGTRKTPECRYVHRMTAS-----TDLADY-  
LYTYVDVTPSS-----YVFEYAEAP---AP-----DRAAAP-----GAVSMSFDKIL-----  
VRLQTIQVNEITNLDRLNA---NTPGTPLIIDY-RFPICRL-----CGK-  
ASHKHPHHVAVQEDTLRIFKAGNPNSCR--VK-----TVPLAQ-NKLFAISERIMEAG----  
VVHKNKYGEYIAWI-----AGRWETED-----NNHLTRLVLSMKDAVDDD-----  
EGLVLP-----SNRRIENNLKDMI--TSCVA-----  
TDLFPEKLQFDNGILDVAT-----REFHRGEEGKDFVCTVSTGYEYAP-----  
TPAGDPAVTELRAVLDDIQPPTGGNAGNREVERVLSSCLCGVNKPYIFFFYGDTSSGKSTVKKLLRSVF  
DGLFT-ETSQCILVEPFD-K-----GPNPYVSSIHLKRVTFCELPDFSCNNVKKIRSDNVKLTENC-  
IVGRACFSNKISNCNVSTIIIDSNYKPVFDKVDNAIMRRIGLIHFKTHFSPNLNR-----PCL---  
GNSYDV--VKLNAALESKIRTNYFRGAFLTLLEWYAKHHLHG-----LSLEPTPELI-  
PDFRFRRLTD-----TIIAPSDSTHAKHMPSLVRRGYHVSEAGL----PA-----  
LSADGFRTRLV-----SHFNVKIYGSDIDGFIKKNKYTNF----CDEYME-----  
YVFIEDLGSK-----

>u1\_Canvi40556020

MAPHVIRNNHIV-----FVLKKIGVSTKHRNN-----NDIRYVESFT-----  
CEELERY-IAKNPGCTLFEALKNEELYSNIRVFFD-----VDM---EGTLDDNS--  
SAINDFMRVITKFIAD-----YAFDSC----  
KMNTEKDKQQMINDMKENFSITESTNTEKTSFHLIFFNCYTTVDTLINMGKKL-----  
LPLIKQSN-----RLIKA---IDTAVYRHNP SLRVVGTRKTPDNVYVHSKTDNR----VPFKNY-  
LFTYVDFKDD-----CYYFVDESNNQSP-----DLLNWR-----DEYIPFHDAM-----  
KKVCKVIGNNINLKEITP---ENL TEIPLNINY-ATPCNL-----CKK-  
VSHKHPHLLIDNDCIRIICKGNPNCK--IK-----VIQLEG-NKLFSISQQIIDLN----  
VINISDRGEYLIWL-----KDVWRMCD-----ESNITKLILYMKDYISSD---  
CTGLLLCP-----RNRKVIENHLKDML--IDPIE-----  
TDIYPEKLQFTNGVYDIKD-----SVFYQGNDAKNFVCTVSTGYKYED-----  
KEDINGVIEELSKILDDIQPKTKENSENRELYEQILSSCLMGTTKQCIFFFYGETATGKSTTKKLLKSVM  
HNMFL-ETGQVILTEQMD-K-----GPNPFIANMHLKRAVFCSELPDFSCNTSKKIRSDNIKLTTEPC-

IVGRPCYSNKINNRNHATIIIDTNYKPVFDKVDNAIMRRIALVNFKTHFTNSRKK-----VY---  
NTKYDF--IKPLNEGLDSKIQSNYFRYAFLKILLGWYQKYHVPN-----LTILPTPKI-  
PDFKFRLKID-----ALIIPSSTTHIKYIKELSKLGYIIDEDGL-----PV-----  
LYVSTFQOKLQ-----VYFNVKLYGHDIESFILKNKKYINF----TDEYMS-----  
FIFIEDLNNINVSTDISNTE

>u1\_Orfvi41057131

-MAAPICDNSHV-----FLLKRLGVPSSCRRS-----EDPRFVEILT-----  
PFELSNY-IERHPGCCLFETLRDEEDCSVVRVFAD-----VDM---  
DSVLEEDFVAALDELIVELAAFFDR-----FASGSC-----  
GTVPGEVKRAMLANFSVTRSTAETHKTSFHLI FTETYTTLDTLVAAKRPL-----  
LDLCRRSDN-----VLLRA---LDTAVYRHGATLRVVGTRKTPESSAVHRMQSPD----DDIKDY-  
LFTFVELSDAS-----VYFELAEREQHTLS-----TVC-WE-----TSYIPFGDAM-----  
RRVCQAVVNDIVNLRDITE---DNFLDTPLVIDY-ATRCAL-----CKK-  
PKHKHAHHITMGNGCLRLVKGGNAHSCK--VK-----IIQLEG-NRLFTAAQIIIASE----  
VVKLTERNDYIVWL-----NNSWRFSAE-----ESLITKLILDVRHSLPAD---  
YANDMLCP-----RKRKVVETNIRDML--VDISE-----  
TDTQYDKLPFTNGVLDLAT-----GEFLTGDRAKACVCTVSTGYAFSREEFA-  
AAADSEAMRRLVGVINDIQPDTPENAEENRALYERAMSSALCGATKTVIVFFYGD TMTGKSTSKRLLMSAL  
GGLFI-ETGQTVLTDVLD-K-----GNPFIANMHLRRAVFCSELPDFACNNARKLRSDNFKKLETPC-  
IVGRPCFSNKIHNRNHATFIIDTNYRPVFD RVDNALMRRVALVRFRTHFSSAATR----AAAAH---  
NVEYSA--VKEMDES LDTKIQRNYFRYAFLRLLVQWFGKYHVPQ-----VSLAPTPDAV-  
PDFAFHCRVA-----ELVVASNDTHRRAMESLSKLG YVLV-GGN----VA-----  
MPADAFRQLA-----AHFNVRVHGGDIDAFMFKHKKVVNV----TEEYVE-----  
YVFIEDVENK-----

>u1\_Vacvi66275907

-MDAAIRGNDVI-----FVLKTIGVPSACRQN-----EDPRFVEAFK-----  
CDELERY-IENNPECTLFESLRDEEAYSIVRIFMD-----VDL---  
DACLDEIDYLTAIQDFIIEVSNCVAR-----FAFTEC-----  
GAIHENVIKSMRSNFS LTKSTNRDKTSFHIIFLDTYTTMDTLIAMKRTL-----  
LELSRSEN-----PLTRS---IDTAVYRRKTTLRVVGTRKPNPCDTIHVMQPPH----DNIEDY-  
LFTYVDMNNS-----YYFSLQQRLEDLVP-----DKL-WE-----PGFISFEDAI-----  
KRVSKIFINSIINFNDLDE---NNFTTVPLVIDY-VTPCAL-----CKK-  
RSHKHPHQLSLENGAIRIYKTGNPHSCK--VK-----IVPLDG-NKLFNIAQRILD TN----  
SVLLTERGDHIVWI-----NNSWKFNSE-----EPLITKLILSIRHQLPKE---  
YSSELLCP-----RKRKTVEANIRDML--VDSVE-----  
TDTYDPDKLPFKNGVLDLVD-----GMFYSGDDAKKYTCTVSTGFKFDDTKFV---  
EDSPEMEELMNIINDIQPLTDENKKNRELYEKTLS SCLCGATKGCLTFFFGETATGKSTTKRLLKSAIGD  
LFV-ETGQITLTDVLD-K-----GNPFIANMHLKRSVFCSELPDFACSGSKKIRSDNIKLETPC-  
VIGRPCFSNKINNRNHATIIIDTNYKPVFD RVDNALMRRIAVVRFRTHFSQPSGR----EAAEN---  
NDAYDK--VKLLDEGLDGKIQNNRYRFAFLYLLVKWYRKYHVPI-----MKLYPTPEEI-  
PDFAFYLKIG-----TLLVSSSVKHIPLMTDLSKKG YILY-DNV----VT-----  
LPLTTFFQOKIS-----KYFNSR LFGHDIESFINRHKKFANV----SDEYLQ-----  
YIFIEDISSP-----

>u1\_Yabdi12085066

-MAGSISNNEHV-----FVLK SIGVPSSHRQS-----EDPRFVDIFT-----  
CEELESY-IEKNPTCTLFETLRDEEAYSVVRVFFD-----VDL---  
DAVLDEIDYIAALEDFILEITNFVSK-----FSVMEC-----  
GANQNTVLKCMRSNFS LTKSSNKNKTSFHMI FPDYTTINTLIAMKKPL-----  
LEFLRSEN-----PLIRS---IDPAVYRRKATLRIVGTRKISNND SIHLKQPPH----DNISDY-  
LFTYVKFHNS-----CYFSLSKRLEDVLP-----SSL-WE-----PNYIPFNEAI-----

KKVSKIIMNDIINLKDLDI---NNFTTIPLVIDY-VMPCAL-----CKK-  
KSHKHHHQLSLGNGMIKIYKAGNPHSCK--VK-----AIMLEG-NKLFTISQLIMDAN----  
VIRLTERGDHIVWI-----KNSWKFNNE-----EPVITKLVLMKMDQLPSE---  
YTPDILCP-----RKRKVIENNLKDML--VDTVE-----  
TDTYPHILPFGKNGVLDITS-----GKFYHGEESKKFICTASTDFNFEMDKFL--  
NDTSIEMKELECIIDDIQPKTCENLKNRELYERTLSSCLCGSTKQCITFFFGETATGKSTTKRLLQSAIG  
DLFI-ETGQTILTDLMD-K-----GPNPFISNMHLKRSVFCSELPDFACSGSKKIRADNVKLLTEPC-  
IVGRSCFSNKINNRNHASIIIDTNYKPIFDRVDCALMRRVSLVKFRTHFSQPSSA----EAAKS---  
NSAYDD--VKPLDENLDMKIQQKYYRFAFLNMLVKWYQKYHVPT-----MRLFPTPAV-  
PDFAFQLKVS-----SIIIVASSSTHLSLISKLSKIGYVIE-NDL----IV-----  
LPSNIFQQKLA-----GHFNIKIHGHDIESFINRHKKFANV----SEEYLE-----  
YIFIEDITSK-----

>u1\_Myxvi9633716

-MAKALVDNEHI-----FVLKSIGVPSHRQS-----EDPRFVDIFT-----  
CDELENY-ICNNPTCTLFETLRNEEDYSVVRVFFD-----VDL----  
DVVLDEIDYVAALEDFILEVTKFVSV-----FSVKEC-----  
DAPQNKVLKCMRSNFSITRTTDPDKTSFHMIFFPDVYTTMHTLIAMKKPL-----  
LEFLRSSEN-----PLIRS---IDPAVYRRKTTLRVVGTRKAANNDKIHKOPPH----TNISDY-  
LFTYVRMHRDS-----CYFSLTKRLDDTMS-----EAL-WE-----PNYIHFGDAM-----  
KKIAKAVVNEIINFKDLDV---TNFTTVPLVIDY-VMPCAL-----CKK-  
KTHKHHHMISIGNMLKLYKAGNPHSCK--VK-----TILLEG-NKLFTISQIIMDSN----  
VIHLTDRGEYIVWL-----KNAWKFNTD-----DPIITKLVLMKMDQLPTE---  
YVPDILCP-----RKRKVIENNLKDML--VDVTE-----  
TDVHPCILPFRNGVLDISN-----GTFYTGHDSKDFICTVSTGFNLNMEKFL--  
DNDSEEMKELVSIINDIQPLTEENKQRELYERTLASCLCGTTKQCITFFFGETATGKSTTKLLHSAIG  
SLFI-ETGQTILTEVMD-K-----GPNPFIANMHLKRSVFCSELPDFACSTSKRIRADNIKKLTEPC-  
IVGRQCFSNRINNKNHASIIIDTNYKPVFDRVDNALMRRISLVRFRTHFAQTATN----KEMLN---  
KAAYDD--VKPLDETLDMKIQKNYYRYAFLNLLVQWYQKYHVPH-----LKLFPSTPENV-  
PDFAFQLKVE-----SLIVSSSSTHTHLISSLSKIGYVME-DNL----VV-----  
LPAPLFQQKLA-----KHFNVRVHGHDIESFITRHKKFANV----KEEYLE-----  
YIFIEDITSK-----

>u1\_Molco9629026

-MARAVDGNVI-----FVLKTLAVPADCRRR-----EDPRFVEAFA-----  
PDELDAY-IREHPRCTLFETLRDEEAYSVVRVFFD-----VDL----  
GAPLPAHELLPAFDGFIRALSRFVAN-----FAVDEC-----  
AAPASRAALARALRADFSLTRSTNPGKTSFHLVFRNLYTTLDTLVAMKRPL-----  
LALARRADN-----PLLRA---LDPAVFRRGASLRVVGTRKTPDSPHVHARTPPH----TRIQDY-  
LFTFVDFSEKS-----CYFSL--RPRRDAP-----EPIAWDH-----QQLVPFADAM-----  
RKVCQVLGNEILNLHEFTE---DNFTTTPLLLDY-VTPCAL-----CRK-  
SAHKHPHHLALGNGALRIFKSGNPHSCR--LK-----VIPLEG-NRLFRTIAQRILDAN----  
VINLTERGDYIVWL-----RNCWRFSGE-----ESVITKLVLMRDELAPE---  
FALPLLCP-----RNRVIEHNLRDML--VDAVE-----  
TDVFPEKLPFADGVLDIAD-----GSFHTGADAKDFMCTVSTGYRLERDARA-  
RDALAPARAELERVLDIQRSPGNAENRALYKVLASCLCGATKPCIFFFFGETATGKSTTKLLQSAL  
HGLFL-ETGQTILTDLMD-K-----GPNPFLANMHLKRAVFCSELPDFSCSGAKKIRADNVKRLTEPC-  
LVGRPCYSNRINNKNHATIIIDTNYRPFVFDKVDNALMRRVGLVFRFRTHFSNRGAP-----A---  
SRLYDT--VKPLDAALDRKIQSHYFRFAFLELLEWYQRHAAA-----LELEPTPDLI-  
PDFCFQRRLD-----AVLLPSDSTHRRMLPQLAKLGYVLAGDDA-----LG-----  
MPGALFQURLA-----EHFNVRVFGQEIESFVQKNKKYVSV----SEDYVE-----  
YIFVADLEKAKAETQ-----

>u1\_Squvi549059685

```

-MPRVVEDNKHI-----FVLKRLGVPSSCRQR-----EDSRFVEVFT-----
CEELERF-IANNPKCTLFETLRDEEMYSVVRVFD-----VDL----
DTPMDGPDFLAAIEDLILELSAFVGR-----FAAREC-----
GAQAEVVRLMRSNFSLTQSTDADRTSFHLIFPDAYTTMETLIAMKRPM-----
LEFARSSDN-----PLIKA---IDTAVYRHKATMRVVGTRKTPDDERVHRRQPPH----EDISDY-
LFTYVDLHENS-----CYFCLERRPEDALP-----DRM-WD-----PGYMAFKDAM-----
RRVTQVLVNEIVNLGEITE---DNFATTPLVIDY-VAPCAL-----CRK-
RSHKHPHQLSLGNGALRIFKAGNPHSCK--VK-----VIMIEG-NRLFTIAQRIVEAN----
VIHFTERGDYIVWM-----RGAWRFNTE-----EPSITKLVLGMRDSLPGE---
YGPDLLCP-----RKRKVVESNIRDML--VDPVD-----
TDTHADKLPFSNGVMDLPT-----GTFHTGDAAKEFLCTVSTGYRLPEQALA-
PESLSPALEELERIIDDIQPPTPENAENRALYERTLSSCLCGTTKPCLVFFFGETATGKSTTKRLLISAL
GGLYI-ETGQSILTEIMD-K-----GPNPFVANMHLKRAVFCSELPDFACSGAKKIRADNIKKLTEPC-
IVGRPCFSNRINNRNTHATIVIDTNYKPVFDRVDNALMRRVALVRFRTHFATSNDGGVAAAAAAK----
NEAYDD--VKPLDESLDRKIQRNYFRFAFLHLLVVRWYQRHHVPA-----LRLEATPDAV-
PDFAFQRRVG-----SLLIPSGSAHVPMPELAKLGYVLV-DGA----VG-----
LPAHTFQQLA-----NHFNARAYGHDMESFVARHKKFGSS----NEEYLE-----
YIFIEDVASK-----

```

-----  
-----  
NCVOG0031, unclassified DEAD/SNF2-like helicases  
-----

>ASFV\_9628213

```

MAYPELDAADFLQQLARRKEFKSLISPPVDQKELIRDLRAHFVQIGGPGCEKGGRAFFPCDPYASPFPSI
KGLQLHNAQLFVQNFQNPNTPYSRLLLLNWQTGTGKSIAAIAIARQFMNHMNFIEANPWIFVVGFTRAII
QTEMLRRPELGFVSYKEVAELHRLHIAKQSGSTTSVESRHLNGFVSTLKRRLTDRNRGGFFQFYGYKEF
ASKLFNITSKGEENFDVLSLFHRSDEAEDTLNENDISQFVQKISEAETNGLIRVNQKIMEQLRGGLLIA
DEIHNVYNIQERNNYGIALQYVLDAFP HQAPRAVFM SATPVTG SVM EYVDLLNLLVPRHEL PNGQP-
LQRQQLFDSSGHSVKWKDALALVERLSTGRVSFLLDNTNFYPERIFAG--
KMSYKDETLPYLHFIECPMSEYQLETLKQLGDPKISSNAYSIDMVFPNPKFSKQTEPKAYGLFNSTE
TPTALSMASDWLLENGVQIIEPSRRAPFNVSGSFLSLQPPTHISGLAFYSGKYTQMMKDILSIIRQGRG
KILYHNRVVRMSGVLILQEILQSNLNEVSSPVGTTTRCSICAAIRDEHTSDHQFIPVRFITLHSE---

```

```

IEPAVRERSLALFNASSNLEGHQLRILIGSKVIVEGLNFQAVRYEMIMSLPLDIPRLIQVFGRRVVRKNSH
MELPPSERNVTIYLYVSTTPDGGPELAKYAQKLKEYILIQEGDKALRKHAIDGFTNQIKIDKPMLESLPL
SPSITPANVGATVLTNFEAYGYGEQEVKTISNIIISLFMARPVWYSELWKAVSTPKLIQGITIDNKLFS
EDNFALALISLCSKNQCKELWIQNRLCTIMHVPAKPEHLYVAAVLNHKKEPVLDIETYIRDFQLPAMHS
IRITKYLEHSQTKPEFQVLYEKFQKDFQDEPMEQVLIHYPASFHYTMLEALIIDNLAGMGALVEVYKFF
IAFSKKDIQFPDIFKIIISHVPGDDNTLVGYATEDSVRLITSREDKTWHEIPLYMLNINVKRKENDIVIG
YMESK GKALKFKIRPPIQVLKNEITDIRMLNRGAVCETRGREEQKQIADQLGISLNLTKISA IKLCLLI
RNNLLQKEMEARNQPNGMQDGIRWFYLFNDKMPSLVHTS

```

>u2\_Me1sa9631345

```

-----MNKIILEDLKE-----
SNVPLYIPQILPHQLATLDFLNERSLKEKKS---VLLFHKMGSGKTIISLLFS-----
IIASIETKILIIIPNTSIMDI-----
-----WISKLYDS--LLLLNKNDKYNLNNIEFTTRSRLNEELLGTN-----
KNINDIITENIKKYDNYII-----IIDEAHNFFG----NASG----

```



ELLIHIKQNSTARYVLLTGSPISNTIESLKDIVELLTNETFEYNKYIESAGNKVFQ-----  
QRINKQGIELLKNKLTGLISYYDEDRKDI-PSPIFQGNIKLLNYP-----  
VVLCPMSKQLQEDNYNMI---SNQTEN--DMFIKLMNVSLVALGDK-----ENYTNFDLL-  
MASNKQIFPN-----FYVSNKGKFIGOELIDLN----ISSKLYFMNSILTSP--  
NAGKRFIYFANSTI-GSTIIRSVMIANGISEYDKEIVNNFVCVNCLKER---  
NCNNKECIPMKFVIITSKESNKGNNYSI-  
NKILSVFNEDVNENGSVIMFLFGSRIIAEAYTLKDIKEIWFLTPETKSELEQCIARAIRSFAYKDK----  
NTRVVVRICLATTPN---ALSNEISQIIEKYKDESLSDEEKTLLLNKFEMKLVNYAIDL-----  
PYDLRKQLYSEFKS-----EKAKVAYNIFINL-----  
SILTNNILNDNILKCFIIEK-----IRRSYENSR-----  
YKLDILSYIKKNLK--FDYKNKIEDYVNEF-----  
VNDGVVVYNKSGFTCY-----ID--  
WFKDDIVVKQIIL-----  
EFNNYLLSYNY-----

>u2\_Anocu578887596

-----MNKIILDDLK-----  
YNVPANIPQILPHQLATLDYLYKTCVENNKS---VLLFHKMGSGKTMISLLFA-----  
IIICNIKKILIVLPNSSILDM-----  
-----WKS NFLDA--IKLL-PMKEYLLENIEFTTRTKLNENILGVG-----  
QNITEIENKIQYNNYIM-----IIDEAHNFFG---NITG----  
KVLINIRKKTNIYVLLLTGSPITNTVTTLKDIVELLAKENFDNFKYIEQVGNKVFEE-----  
KSINKSGIEFLNTHLSGLISYYDEERKDL-PQVVFKGK-KIFLYP-----  
LVLCPMSELHEKNYNEI---ADV TEN--EMFIKLLMNVSFVALGPK-----DNYIHFKEK---  
SDQQIFDN-----LYISNGRFYGSELIDLN----ISSKLTFRDTIFKER--  
NVGKRFIYFANSTI-GSAIIRSVMRANGISEYGKEILNNYTCVNCITDK---  
SCNDNECIPMKFIIITSKESNKGNNNYI-  
NNILSIFNEDINDEGHNILLFGSKIISEAYTLKNVKDIWFLTPETKSEFDQCIARAVRTFSYKDL----  
NIKVTVRVCVATLSN---TLISDISKTIEQRYETLTVTDKSILLNEIELKLGRSSQDL-----  
SYDFRKQLYSELKF-----EKSKVADNIFKKL-----  
NVFITDKINNIVFECFIEK-----IRRF CYTNNR-----  
FKYNDVINFLSKDIDYNNIYTDEILHNTNEA-----  
IENHLIIYNNVFGICY-----LD--  
KYNDDIVTIPVIL-----  
DYNEYLYSVRL-----

>u2\_Mytse506497932

-----MNKLILEDLRN-----  
DNIPNNISQILPHQLATLDFLYQKCINDLSS---VLLFHKMGSGKTIISLLFS-----  
IIVCNIIKKVIIVLPSSYLEM-----  
-----WKQNL YRS--LILL-PNKEYNLQNIIEFTTRTKLNEDISVMG-----K--  
TDIINEKLNKYNDYIM-----IIDEAHNFFG---NMTG----  
SVLSTLRKNTNIIYILLTGSPITNTVSTIKDIVELLTRETDFENKYIKIGGNRVFE-----  
KSINNEGITFLNKNLKLGLISYYDEERKDI-PEVKYRGK-KIFLCP-----  
LTLCPMSKLEHENYEV---AKNIKN--DMFIKILMSVSLVALGSI-----TNYENFSQF-  
METDKKIFDN-----LYISNGKFTGSELVDLN----ISSKLLKFRDTIFSER--  
NVGKRFIYFANSTI-GSAIIRSVMIANGISEYGKEIVNNFACVNCIKDK---  
ICENSECIPMRFVIITSKELNKGNSNYI-  
NNILSIFNEDINDDGNMIMFLFGSKIISEAYTLKNVKDIWFLTPETKSEL DQCVARAVRSFSYKDI----  
DTKVIIRICIASTTN---T LSNVSKTIEQYKDVNLSEIIRNTLLNKIELLLTESSYTL-----

SYDFRKQLYSELKF-----EKSQVADNIFKNL-----  
TIHSEDKIEPCVLECFVLEK-----IRRYCYNSR-----  
FKFKNLIKNIKNIG--NSYTNLVEKYVDYA-----  
ILSSFVIENNKFGNCY-----LR--  
YFKDDVVTVKIIL-----  
EYNNHLLSVRL-----

>u2\_Amsmo9964488

-----MNKVILDDLNR-----  
DNIPNNIAQILPHQLATLDFLYQKCINNANS---VLLFHKMGSGKTIISLLFS-----  
ILICNIKKVIVLPSYSILEM-----  
-----WKQNLIRS--LILL--PNKEYNLQNIETTRTKLNEDIMLIG-----K--  
TDIINEKLNKYNDYIM-----IIDEAHNFFG---NMTG----  
SVLSTLRKNTNIIYVLLTGSPITNTVSTIKDIVELLTRETFDENKYIKIGGNRVFE-----  
KSINNEGIAFLNKNLKLISYYDEERKDV-PEVKYRGK-KIFLCP-----  
LTLCPMSKLHEENYYEV---ARNTKN--DMFVKLLMSVSLVALGSI-----SNYENFSQF--  
METDKKIFDN-----FYISNGKFSGSELVTLN---ISSKLTFRDTIFKER--  
NVGKRFVYFANSTI--GSAIIRSVMLANGISEYGKEIVNNFTCVNCIKDK---  
ICHNGECIPMRFVIITSKELNKGNSNYI-  
NNILSIFNEDINDDGNMIFLFGSKIISEAYTLKNVKDIWFLTPETKSELQCVARAVRSFSYKDT---  
NTKVIIRICIASTTN---TLSNDVSKTIEQYKDVNISDVYKNTLLNKIELLLTESSYTL-----  
SYDFRKQLYSELKF-----EKSQVADNIFKNL-----  
TILSSDTIESDVLECFVLEK-----IRRYCYNTR-----  
FKFTTLNEYIKNID--IKYNDKIKEYINNA-----  
IESSFVIENDIFGNCY-----LT--  
YFKNDIVTVPIVL-----  
EYNNHLLSVRL-----

>SGPV090

-----MNSTVLKILEN-----  
AQKNNHSRLTILPHQMATVDFALKTIIDNKMS---AMIFHDMGSGKTFVALIFA-----  
LLISTEKNVVIILPNNNILEI-----  
-----WQSKIYQV--QSLI--GCPDMDKIKMYSIS----TFILLK-----  
STNDEIDTNKIMDCQDSVF-----IVDEAHIIIFG---NATG----  
KFLLTIKQKTNVLFMLLTGSPISNTPKALVHIIRLMTGSDISPPKLI-NQKTKIIH-----  
ISLNETGKELLESLLKGQISYYKNNGESI-PTPKYIGQ-PVLNIP-----  
MIQCPMENIQEVDYDKT---REMSSN--EMFETMVNVSMCALGQIFLYKVDNFINNLA-----  
TSLLPN-----LKSNDGLLTGQDLVTL-----  
ISSKFYFMKYILTEGIEKPEKHLIYFSNATY-GTLIIRSIMLANGINEYKGANAKDPICFVCKHKK---  
TC--VECLFITFTILTSR-----VNESI-  
TPTLEVFNTRKNKHGHFISLLFASYALGQSYTLKEVKNLWFLTPDTYSQYTQIIGRAIRKFSYENP---  
NEEVKIRI-LSCVPK---KYKHK--QLKPDMTDEEID-----KL-----  
PFDIKKQYYLESKS-----NESSKIYSIFQGI-----  
SKQYKDPVHKNLWRTMVVEL-----LRIYFKSHPR-----VKRTD--  
SKFMTFMTFPGPDLETLNKIITEL-----  
LDAHVQILNDIFGSC-----  
LYYPWGNDEIITVPIQL-----  
TLPKHCISIPLTKEENIVLTRDSTGIEVSLLVSKSTGKMLKYSLDGKNIVVNTVNISKNALLIICEKLI  
TLPKHTKKNTLNLIEAKLTELQTKNPHLYIEYK-----

>u1\_Orfvi41057132

-----MNSDVIKLFAG-----  
HDESVPGILPHQLATVDFLIRRVLDDNVS---VLLFHIMGSGKTVIALFA-----  
MVASRTKKVYILVNVNVMNI-----  
-----FNYSMMVM---ANLF---NAPFVAENIFVYSTT-----SFYSLN-----  
CNDGVVNYNGLSKYENSF-----VVDEAHNIFG---NNTG-----  
ELMMVIKNKTRVPFLLLSASPITNTPLTLSSIIISMSEKDVDVGDIV-VQGKKVFQ-----  
ILLNEHGVRVIREVLKGRISYYEMPDTDM-PEVLYHGR-RFLDTR-----  
VVYCRMSRRQEDDYLTV---RRLCNN---EMFEKNMNVSMVAVLGPL-----  
NLVNNLDVLFQAQDKDLYPN-----LRISNGVLYGNELTKLD-----  
ISCKKFFISKVGAMR---GKHFIYFSNSTY-  
GSLVIRNVMLSNGYSEFGGSQSNPHTTPDGRAK-----TFAIVTSK-----MKASL-  
EELLEVENSAENNDGGELMFLFSSNIMSESYTLKEVRHIWFMTIPDTFSQFNQILGRAVRKFSYADV---  
AAPVNVYL---MAAVYS---DFDEDIVSLEDYSVED-IN-----AL-----  
PFDVKKLFYLFKFA---KETNRVYAILQEL-----  
SDAYSARHPQLVDVVLGEI-----VRQFFARHCR-----VPAED---  
AALVAAVEAVLGTREAAAHEYIRAI-----  
VDGHFFVTNKTFGKCL-----LF--  
RHERDIVTVPFEL-----  
EHDPFAWAINFRKEVSVVNI-----

>u1\_Nilcr115531778

-----MNSILKLFKE-----  
HVDTIPNLLPHQIATVDFLVRRLVEKQS---ILLFHIMGSGKTIIALIFA-----  
LIVSKYKVFIIIVPNINILNI-----  
-----FNYNINTA---ENLV---NTDYVIENIHIYATT-----SFYSLN-----  
YNDNIINYNGLSKYEDSVF-----IIDEAHNIFG---NNTG-----  
ELMTVIKNKHRVPFLLLSGSPITNTPITLTNIINLMSDVEINFNDII-IQGKKVFQ-----  
ITLNEGVKVIKDVLRDKVSYELEKEL-PDIVFHGR-RFLDTK-----  
VVYCPMPLQERDYINI---RKMCSN---EMFEKNMTNVSLAVLGQL-----  
NLINSLDILFQDQEKELYPN-----LKINNGFLYGDELVTLN---  
ISSKLYFVRTIQRK---GKHFIYFSNSTY---GGFVIRNVMLSNGYSDYNGSRVSNPKMI-  
DDRVK-----RFAVVTSK-----MKSSL-  
EDLLEVENSPENAEGHEIMFLFSSNIMSESYTLKEVRHIWFLTIPDTFSQYNQILGRSIRKFSYANL---  
QVPVNVYL---LATVYG---DFDDEIDSLEQFQLEE-IN-----SL-----  
PFDIKKLMYLFKFT---KETLRIYSILQEI-----  
SVVYSLPPHPYLVDVILGEM-----TRQFFYHHLR-----VNYRD---  
NALRKKFREVLDPEDRVEAYLSRL-----  
VEDHFFVSNKHLKCL-----LY--  
RVKSDIIVVPFSL-----  
KYNKYTLQINFRKDKNVFV-----

>u1\_Canvi40556018

-----MNLEILELFNG-----  
HIDNIPNIPHQLATLDYLLKTILDQNES---VLLFHIMGSGKTIIALFA-----  
LIVSKFKVYILVNVNINILNI-----  
-----FTYNLDA---TNLI---NTEYVIENIHIYSTI---NFYSLN-----  
YNDNVINYNALTRYNDSIF-----IIDEAHNIFG---NNTG-----  
ELMTIINKNKNVPFLLLSGSPITNTPITLSNIISIMSDEGINFNDII-IQGKKVFQ-----  
IILNEKGVSVLKKILKNKISYYELCDEL-PSIIFHGK-EFLDTK-----  
VVYCRMSKLQEIDYINV---RKL CNN---EMFEKNMTNVSLAVLGPL-----

NLANNLDLLFAEQDKELYPN-----LKINDGVLYGDELTKLN----  
ISSKFRYFIDTVSNLN----GKHFIYFSNSTY-GGLVIKYIMLNNGYSEYSGSQGTNPKTI-  
NGNLK-----TFAIVTSK-----MKASL-  
EDLLEVYNSPGNDNGEKIMFLFSSNIMSESYTLKEVRHIWFMTIPDTFSQYNQILGRSIRKFSYKDV----  
SKPVNVYL-LATVYS---DFNDKIKSLDDYNIDE-IN-----TL-----  
PFDIKKLLYLKFKT-----KETKRIYSILKDI-----  
SINYRSCPHPYILDVVLGEM-----IRQYFYHHSR-----VSFDD--  
QKLFKMINSIKCKEKTMOYIKKI-----  
TEDHFFITNKTFQKSL-----LY--  
RHKNDIIVVPFSL-----  
VFKEYSWMINFRKELNVVV-----

>u1\_Squvi549059686

-----MNVGIRDLFRE-----  
HVDSIPNILPHQLATLDFLVRVLEKNHS---VLIFHIMGSGKTIVALLFA-----  
LVASRFRKVYILVPNINIMKI-----  
-----FSYSMDVA--INLF--SADYVAENIFLHSTT----SFYSLN-----  
YNDNIINYNGLSRYNDAIF-----IIDEAHNIFG---NNTG----  
ELMTVIKKNRVPFLLLSGSPITNTPITLSNIIGLMSDEEINFSDII-VQGKVFQ-----  
ILLNEHGVDVLRRIIRGRISYEMPQTDL-PEIVYHGR-RFLDTR-----  
VIYCHMSKLQERDYINV---RKMENN--EMFEKNMTNVSLAVLGPL-----  
NLINNDILFQDQDKELYPN-----LKISNGVLYGDELVSLN----  
ISSKFKFFINRISSLT----GKHFIYFSNSTY-GGLVIKYIMLSNGYSEYNGSQGTNPKMV-  
AGHPK-----TFAIVTSK-----LKASL-  
EDLLAVYNSPANDDGSRIMFLFSSNIMSESYTLKEVRHIWFMTIPDTFSQYNQILGRSIRKFSYADV----  
SKPVNVYL-LASIYS---DFEDEITSLDDYSLDE-IN-----VL-----  
PFDIKKLLYLKFKT-----KETTRIYNILQDI-----  
SDNYSMPHPYIVDVVLGEI-----TRQFFYHHSR-----VKVDD--  
PRLTEAINAVLNSPEATRKYIDSI-----  
ADGHFFVSNRVFDKAL-----LY--  
RYGDEIITVPFRI-----  
SYEPYVWAVNFRKELSAIPH-----

>u1\_Molco9629027

-----MNLGIVSLFRE-----  
HVDSIPNILPHQLATLDFLLRSILDENNS---VLLFHIMGSGKTIIALLFA-----  
LIVSKFKKVYILVPNINILKI-----  
-----FTYNMGIA--VNLI--NSDYVLENIHIYSTT----SFYSLN-----  
YNDNVINYNGLAKYNNNAIF-----IIDEAHNIFG---NNTG----  
ELMTVIKKNKVPFLLLSGSPITNTPITLSNIISIMSDEGINFSDII-IQGKVFQ-----  
ILLNENGVSVLKRILRDKISYYELQDTEL-PSIVFHGR-RFLDTR-----  
IVYCHMSKLQERDYINV---RKLNN--EMFEKNMNVSLAVLGPL-----  
NLINNDILFQDQDKELYPN-----LKISNGVLYGDELVSLN----  
ISSKFKFYIARIQSLT----GKHFIYFSNSTY-GGLIIKYIMLSNGYSEHNGSQGTNPKTI-  
GGRLK-----TFAIVTSK-----MKSSL-  
EELLAVYNSPANNDGSRIMFLFSSNIMSESYTLKEVMHIWFMTIPDTFSQYNQILGRSIRKFSYTNI----  
AEPNVVYL-LAAIYA---DFDDDITSLDNYSIDE-IN-----VL-----  
PFDIKKLLYLKFKT-----KETKRIYSILKDI-----  
SVNYTLPPHPQIVDVVLGEL-----TRQFFYHHSR-----VRADD--  
PELFAAIDRVLCSPDSTRYLDEI-----

TRGHFFVCNRVFEKAL-----LY--  
RHGEDIIIVPFKL-----  
SHDQFLWAINFRKEYNVGAPL-----  
-----

>u1\_Vacvi66275908

-----MNTGIIDLFDN-----  
HVDSIPTILPHQLATLDYLVRTIIDENRS---VLLFHIMGSGKTIALLFA-----  
LVASRFKKVYILVPNINILKI-----  
-----FNYNMGVA--MNLF--NDEFIAENIFIHSTT----SFYSLN-----  
YNDNVINYNGLSRYNNSIF-----IVDEAHNIFG---NNTG----  
ELMTVIKKNKIPFLLLSGSPITNTPNTLGHIDLMSEETIDFGEII-SRGKKVIQ-----  
TLLNERGVNVLKDLLKGRISYYEMPKDL-PTIRYHGR-KFLDTR-----  
VYCHMSKQLQERDYMIT--RRQLCYH--EMFDKNMYNVSMVAVLGQL-----  
NLMNLDTLFQEQDKELYPN-----LKINNGVLYGEELVTLN----  
ISSKFKYFINRIQTLN----GKHFIYFSNSTY--GGLVIKYIMLSNGYSEYNGSQGTNPBMI-  
NGKPK-----TFAIVTSK-----MKSSL-  
EDLLDVYNPENDDGSQMLFLFSSNIMSESYTLKEVRHIWFMTIPDTFSQYNQILGRSIRKFSYADI---  
SEPVNVYL-LAAVYS---DFNDEVTSLNDYTQDELIN-----VL-----  
PFDIKKLLYLKFKT----KETNRIYSILQEM-----  
SETYSLPPHPSIVKVLGEL-----VRQFFYNNSR-----IKYND--  
SKLLKMVTSVIKKNKEDARNYIDDI-----  
VNGHFFVSNKVFDKSL-----LY--  
KYENDIITVPFRL-----  
SYEPFVWGVNFRKEYNVVSSP-----  
-----

>u1\_Yabdi12085067

-----MNLEIVDLFNG-----  
HINNIPNIPHQLATLDYLVRSIIDENKS---VLLFHIMGSGKTIALLFA-----  
LVASRFKKVYILVPNINILKI-----  
-----FNYSMDVA--VNLF--NSEYVLENIFIHSTT----SFYSLN-----  
YNDNVINYNGLSRYNNAIF-----IIDEAHNIFG---NNTG----  
ELMTVIKKNKIPFLLLSGSPITNTPITLSNIISLMSDENINFGDII-IQGKKVFQ-----  
ILLNENGVKVLKSILKGRISYYEMPSTDL-PKIHYPHGK-KFLDTK-----  
VYCHMSKQLQEKDYNV---RKLNN--EMFEKNMNVSLAVLGQL-----  
NFINNLDILFQEQDKELYPN-----LKISNGILYGDELTTLN----  
ISSKFKYFIGKITSLT----GKQFIYFSNSTY--GGLIIKYIMLSNGYSEYNGSQGTNPKII-  
NGKPK-----TFAIVTSK-----MKSSL-  
EDLLNVYNSQLNEDGSQIMFLFSSNIMSESYTLKEVRNIWFMTIPDTFSQYNQILGRSIRKFSYLDI---  
NKPVVYL-LATVYS---DFNDDITSLEDYSLDE-IN-----TL-----  
PFDIKKLLYLKFKT----KETNRIYSILQSI-----  
SDTYRMPPHPYIVEIVLGEI-----VRQFFYHHSR-----ISFNS--  
KELINAIQLVLPNIDLAKKYINEI-----  
VNGHFFVSNKIFDKSL-----LY--  
KHNDIIVTVPFKL-----  
SHEPFVWGVNFRKEYNVISSP-----  
-----

>u1\_Myxvi9633717

-----MNSAVIELFRH-----  
HVNNIPNIPHQLATLDYLVRSIIDENKS---VLLFHIMGSGKTIALLFA-----  
LVASRFKKVYILVPNINILKI-----



>u2\_Melsa9631524

-----MSVFNNKIFK---STLSTDEYIDSDHAIHYIKR-----  
TYDESIFKELTNDIENIRIHIINWY----QYNY-  
SKLERYIVCKCKNIDTDELIFFIFDFYHYFLCSKELVNNNNDLKDLINEIDEYK-----  
IGEYEILENLKILDVDLIPKDYDNFEETDINI AKYRNLYLFKTIFKI-QLESEFNHSFLDYRWFYVL----  
NNIDPSACYNIDITSDNCKIFVTNIHFK-----FKTYVSNPKKLFMNKIDPLPCK-----  
ISRLSFDIECKQTGSFPDPKYPISHI-CVECFYDDPKKNI----  
LILTNCNLYEKNKKNKKVYDMNECEKILNMNSSV-----IKIYT-SEKNILIIFQCLLFH-  
EFDYILSFGHEFDIPYINTRMDIYNLLKLRMLNPFPGPNLNVI-----KGDASSRY-  
THIEYSSILFDLYVYTKKTY-VLPEYKLETVCKTKFNINAI AELIENTNNVKIIPK--DTKNKLIKIF-  
YSVIRTANYCFINDIAY-QINKNDIIDNMQKLYDKDAINQSIGVFPFIVKNCNI----  
TGNIVVALSKDDIDIGDKSTYENYTI EKANEIGNYCIHDTVLCNKLF-  
ETDLIHEVITGYSSQYLLPQNQVFNFTSSNTATGQLLYTLLQEK-----QMFKKYITEKD-  
EYEGAYVFDPKVKKYITEPIILEDYTSLYPTIMRQINASPEKIIKVI-  
TSNDNIMNAKIDNYIFNTYNYPEMYIDITN--SNK-  
LTTFIITDCRKGDIPLMLKQGMERSFYKKMNDAKKANDDIL-----  
YNVYNSMQYTTKIFINSIYGLMASETFMFNSKYCAQFCTALGRKCIK-----  
-----YTAD---ILNNSYINGIFTVNN-VINIFTKT-----HIQTKYNSNIQE-  
CFTLEIVYGDTSVFIIVHFKNKSLNDTYMLRLCKDIGIF----ISNTIS--  
NTGIFPKLFNL-----  
EFGGV-----  
KKWMLFIEKKY-----  
ISYDIINYDTLEAKIESKGTSLIKRDYSNFHKHHYKTIIEIIQKSIENK--NNNSKNVVIKYIDE--  
LIKNLVDNLDKLNLM-----  
DFAVTKRYSKGYVSIDNIIELTVNKF-----  
NAKYPDYKIRKGRFLYIYGIYMKPID--KSWNISYIKDISKKMIIIPSNL--NNFNISEIRICIESYV-  
IKLITDVSQLLD--DKEIT----EKLSKYK-----KK-----  
>u2\_Anocu578887712  
MNKYIIIKMPIRNNHIFK---TKLISDSFSLSEDAIHYLKLLN---  
INDDTFLPGNNQPEKEIDIKIFNWY----TVKF-  
NRLEEYIVCKAKDYNTQEIIYFIFDLYNYFLCSEDDVDNNEYLKLLKNNIIFNNDN--  
IAKIITLNEFKIISNEVQIQKYNFRHNLKDKEIYKNLYLFLTRFKISRVS DYNHNFNFYRWFYVL----  
NDINPAGSYKINL--KYCKEFNVQNKFN-----SKTYCDDPKLLFSNKITSDKFLP-----  
VSRLSFDIECKHNGIFPKPETCPISHI-CAEWYDDGDSSISKKKIFILINTNIIILDY-  
VNYVDKFDDKFINDIMNNNVY-----NYIYA-TEQVILEFMIYFLQ-  
DFDYILSYNGHNFIDIPYIQGRLNYRGMNLVTONIMGVNNLLINQKITNL-----  
KTIQDIRHDIASN NATTYLDIYNYVKEFY-KLPSYKLDTI AKYKFNINAKTVTDGKITTVPYE---  
SSNIKKEMF-YKVLRTANYCFINDKAFKIYDKKNIINNESDLYNFESIKKSIGKEFKIYNNDIEI-  
SNNVEITLSKDDVEIWDKNAYKNYKLSKAKDIAFYCVHDTILCNKLF-  
EIDMIDYKIAAFS QLYLLPQNKSLLYRNSTNSLGQILYTL LKNK-----MMIVTGHVDYD-  
KYEGAMVYDP--KKKYVSNPTLIFDFKS LYPTAII EGNLSPEKIEKVI-  
ISDDEIANTYIDTYLADTYKYPKYLYIKIKSNINNKTIYTYIVTDKSSPGLISIIILMKGLDERNKYKQK  
SENS--NNEIL-----  
CNLYDNMQYGIKIIINSIYGLLGSNQFIFRSKYCAQYCTALS KKSIM-----  
-----YIHE---ILDKSIYKSNILTINS--CNNIFTQK-----LIKTKYEGNINE-  
DFIIDIVYGD TDSL FMSIIFNK-EMELDYKIRKAIDIGNF----LSNIIN--  
KNDIFPDIFEF-----  
EFEDV-----  
NCWIVFTSKKKY-----  
LAEHVKLITDDIGLKKIKDDIIQLNFINKGTLLVRRDYCKFHKDTYKNIVDIIKCGLSN-----

KNVELEIENY--VINVIDDTLANIRNLNID--  
DFVKTMTYSGKYKDKNNIIDNIVKNY-----  
NRNNPNKIMKGNRFSFVYGTEISKWDKSYESWNFKNTNDINQKIIIIGDDI-KYDN--IIRICIEKYI-  
INLLNNINMLLN-NKNIKNIKDK---YK-----KNN-----  
>u2\_Mytse506497793  
-----MPVLSTGIFK---NHAYNCNEISDEDAHRYIKRLLNKP-  
DKNDILIPLDYLSEKEIEIKIFNWY-----IIYP-  
SSLEQFIVCKCKNYENEEIMYIIFDIHNYLDCRELLESNEILKNIKNNIDIQRNYNTCNNSYICFEDFK  
IITNEVKTQYYNFKEDAKINIDNKDLFLMTPYKISKPHSIYNHNFNQYRWFYVL---  
NKIEPSGSYMINT--KYLQHIKTNYNINNYGNIYKTFYCKNASILFSNPINSNKYLP-----  
VTRVSIIDIECQHFGFPTDPKFPISHI-CIDWYKESSIKPVKKI-  
ITLTNYEIEIENFNGEKNDRFIFSDVEKLMENNVY-----INIYC-SEKYILHFILYALVK-  
DFDYILTYNHNFDFKYIQDRRLKNGLTCLKLINAIEDMDIKH-----  
SYNQDTTYEIHNSNGIIFLDLYNYTKKFY-NLNSYKLGKITKSKFNIIAKIIDNDNEYIVKPID---  
KNKIKINKF-  
YDVIRTANYCFINNEPYKIKNKNIIKNEELYDVESIKNAYNKEFTIFKRDISIKNEIVEVMLSKDDVD  
IGDKNTYTDYTKYKADDIAYYCVHDTVLCNCIF-  
KYDMIHDRIVAFSNDYLLPHSKAFTYKSSNTMTGVLLKTLIENK-----TMIISGNVDSE-  
AYDGLVLP--  
KEIYIRGPTAVFDNFSEYPSNISEANLSPEKILKIIKLEDEYALEIVKKYLEENYPYDPYCYILIHDKI  
KK--TNKYILVDRREPGIITKIIRVGMQEKQKQKLNKNNK--DNEIL-----  
HNYSSALYSKIMINSIYGLLGSETFLFKSPAAAEYCTSLGQKCIT-----  
-----YIKN---LVDNSKYNNILTFNN-QNNPFTNK-----PIKTIYRGNLNV-  
NFTFRIVYGDTSDFINIKFDDIYDNNEIEMLKKADECCKF-----  
LSNIINDIKNEILSKNFEF-----  
EYESM-----  
FNWLIMPAKKY-----  
IGEIVNIDPLSVSYTTKGMALVRRDCPVIHKTILQKTIDILKESLINM---KDN-KNVEIKLNKY--  
VLDVFRDIIENLQYLDIN--  
DYIRSVKYSYGNKDPNNNYEVLVKS-----  
NSRNPNDKIDKGRFSFIYGHVVKWNIKKNVSKYTLDISKHMILEDYL-KNKN--KYRICIEKYI-  
KDILTNLQILD-NKNIIEVYNMLINYS-----PN-----  
>u2\_Amsmo9964364

-----  
MPFLGTGILKFDITQLQNKKEGSDYNAIRYLKRILNKPCDNDILIPYDKLESKEINIKIYNWY----  
IIKP-SSLEQFIVCKCKDYDTEEIIYILFDIYEYFLCDYELSESNTKLKNIKNNIDKYKNSF--  
NSSYLVLLEDYKIITNEVNIQYYNYTEDSKITLNNNDLVLFMTPYKIEKIYSKYNIFINQYRWFYVL---  
NNIEPSGSYRINM--DNMQIKTYNKNK-----TSYYCKNPKLLFSNYVKIDKHIP-----  
ASRVSIIDIECQHFGFPTANKFPISHI-CIDWYMDKNTNPIKKI-  
ITLINYEIKNYVGEKDKFIYTEVNKLLNTNKVY-----ITIYC-TEKYMLHFVLYTLRQ-  
DFDYVLTYNHNFDFTYIQDRRKINKLKLCLDNVYSTNEIKISKF-----  
SYNQDTTYEIDSTNGIIFLDLYNYIKKTYPSSNSYKLGSEITKERFNIFCKISYNNNEYIIEPLNTK-  
ANKNKISIF-  
YDVIRTANYCFINNNPYKIKNKTIEIDIEKLYDLTSIKNSHNKFTIYENDIPINDNYATVMLSKDDVD  
IGDKNAYVNFTKEKSDNIAYYCTHDTVLCNCIF-  
KYDMIHDKIIAFSNEYLLPQCMFAYKSSNNISGLLLKTLYSNK-----TMIYPGNVEFE-  
KFEGGYVIEP--  
KQKYIDSLTAVFDNFSEYPSIIIEANLSPEKVVKVIKLFDEEAANKVEKYLKDNKYKPYDPYCYIKI----  
IKDK-MYKFILMDRRELGVTTQMVKDGREMKNMYKDLKKNK---KDNVD-----  
LHNFYSSALYSKITINSYGLSGSERFIFNSPYCAEYCTVQGNQCIK-----



-----YIQT---LVNNSKYIDNVLILNK-CNNPFTNE-----PIKTNYPGNLNV-  
NFTFNVKYGDTDSLFFITVNFESKFNSKEEKVKVGHKCFTF-----  
LGNVINDKKNKILTDNFEF-----  
EYEKM-----  
YYWMILLAKKKY-----  
IGEVVINMDPLQLMDDTKGTALIRRDCTVIHKTILKNTINILKDFLTND---NTG-ININVKINDY--  
LSSAFKNIENIQNLDIN--  
DFKKSVKYSGVYKDPNYPIELCVKEY-----  
NLKNPNDKITKGQRFDFIYAHKINNEWSKDIKKWNIKYTIDISKHVIILEDYL-KNKN--NYRICVEKYI-  
KDILSNLDQIIN-DKNI IKNIDIMLSYE-----PQ-----  
>SGPV076

-----  
MSRASELELWEKMHFKKKLKPTLTPENLPEQDKVCITFLNWNIIIRDG-WGKPSYMGKSRT-  
QSGEIIWFKTFLPCCYLYMYTSDADELEGTYEQRFDIG-----QFTILDNTYAKG--  
INCAFNFKKKNTNKLSELLVCTKPNINLHCLTEKSYTGLQWFFVF----  
NKINPAGSYSFNKSDPRIREESP-----NVWKS DLMDFPF-EPI-PYFCPP-----  
LMILSFDLECYTVGQF-SPQTQPITHCA---ITLDKITKSRK---  
FCLVDTKSIPDWSNKIKLRSDSVWCNDQSEFYSVYKKKPKDIKYFYM-  
VEKQLLLVIKGFLESDQIDYVLTYNHGCM DIPYVNRLEVYGIPLIHTKIPSTDTETPL-  
VFKKSKSS-----  
NLLSTERCDIYSANGTLFFDLHNFVKKEEIGLNSYSLEALSCKNFNGYGTLVKKGTDHWTWEFR---  
STKNKSLYFLTKLLESAGFINLDN--YCLPICNKVIT-----ETVLSFQTPYLPLHINL---  
ETEQYFEFGKDDVEIDK--IYINYNMKIAEEIAPYQCQHSNLCLFLW-  
EKYNIKYKINAASFLYKLSQDKVLFWYATTTSKGPILEYMKS-----  
KLYLERCVVQKTKYQGATVFEP--DEKII SAPVLVFDYNSLYPNSCIFGNLSPETLVCHV-  
YITDSVKLIWCMKKLKEIYTPDYIVVNCGSVTGKY-  
ISEILVYDRREIGIIPSLLEKFI SLRKYKMKTC---PD--D-----  
YFLYDNLQLVTKLSANSIYGLLGTNEFVLKSIHSAKACTSIGRMLQ-----  
-----YLDD---VFKSSEFKEDGLYLTNPIMQIWKNE-----  
PLKRFYPSQTKLTQCKIKRVYGDTSIFTKLLFDT----TGNVLT MASKIGF----FEDTIN---  
KEILFDQFVV-----  
EFEYI-----  
LINVIMFSKKKY-----  
YGEKYN SDYKENDQPEISGKG--YKKRDMCDY YLDLSKQVDIKIKTLIKQN---P-DVNVLR RHVVQF--  
LLAEFKALLTG-  
KETKVENNKFYFTRRYGADTEKGENPNSKLIKW-----  
---NKS NPNTVMIGERYYYTYVCDRE-----LNWQTN-VKNK RMYEYILENSQEKIPS--  
NMRIFYE IIL-SRVCDRVFKSFDSDQAFIKGFSSKLFGTK-----SKLYNMAQVENWSDSTMEILLNN  
>u1\_Nilcr115531723

-----  
MDIKCLNWF----ENLR-EKKFLYLKARTSA---RDAVFIRFDIHSYSVTDD-----  
PSASATAESLG-----QFRVMHAEERVV--YTPAAARPPTERRELFVRE-----  
ALESEYLTGFLRVNWFVVR---HNVDPSGCYRVAE--SLLSPLGR-----  
KCFHCLDPGA AFATPI-PLFQVP-----SSYLFFDIECRVGGKFP SAFSDPVSHVSF--  
VYVDREGAERR---FTLINS DLLPADEPPP-----SEAACARDVDTAR-----PLTFC-  
PELVLLRFCKSILEQ-  
EFDYVVTFNGHNFDIRYIQVRLHVLAK EEIFFSLPDGSERVRLAIYERNLNNHRSQSGGLANVSYHINNN  
NGSIFFDLYNF IKREE-RLECYRLDVVSKNAFRCHALVEAATPDGAATFRER--EAGDVARVF-  
REVLTTANYVTVGSRVHRIAAKSETGEAGFRV----TVAPAPGA EYAV-----  
GSTHLLAFGKDDIDLQR--LYGDYRLATAETIAAYCLHDASLCKYIW-

HYYSVDCKIGAGASAYLLPQYLSLEYKSSTLIKGPTLRILLENR-----  
IALLRGKPRHHYVGGKVFAP--ANKVFSSNVIVFDYNSLYPNVCMYANLSPETLMFVL-  
VNRNRLDRELHASELRRLYPFPDYVHVETSTAEPNA-  
YNEVSVYSRRREGLIPKLLANFIKRKDYKARSKRA---GSVVE-----  
AKLFDSMQYVYKIVANSVYGLMGFRNNALFSKNSAKSCTAIGRAMIE-----  
-----YLDE---VLNGSSIIDNVLYLGRTPENIFSGE-----LLHDKAVPLAAGLED-  
EVVFRSVYGDTSIFLEINRRD-----VGTTLRLARA----MEEIIN---  
DRVLFGTFRV-----  
EFEAV-----  
YKNLIIQSKKKY-----  
TTTKYPAGFREGDVPILVNKGTSETRRDICAFHKELVNRYKTKLIDLLEQG---R-SSAEVSRLILRD--  
LETFEEDF-R-RPQDTE--  
RFLISRMHHNNYKRPDNPINFALINAF-----  
NAEHED-KIEIGERYHYLYVCDAE-----RPWTFN-PTDIKSYERVYRG---RLPD--GSRIFLEIYY-  
RRVATEVVNLID-DRPLAIDFFKRVFGRS-----PLFSS-----  
>u1\_Canvi40556059

MDIRCVNWF----ENKG-DIKYIYLKAITKD---NGVIFIRFNYYYYYVYDSE--  
EELKFKPIERIELG-----EFDIIKIDEVLD--DDIENINERKTYKSDLVVVKDVKR--  
SREKKYLGEYLDITWFYIL---NNIVPDGCRYRINK--DNLKQIYT-----  
DCYHCDNVKEMIEEI-PIFEVK-----FTYLFFDIECQFDKKFSPVFNPISHISC--LIIDK-  
KDEYK---FTLINTDLLPDVEPTISSRKQFCPRD-----KITFC-  
SEVIMLRIMKKILEE-  
RFDVVTFNNGNFDIRYISNRLTILEKKSIFSLPDNTETTDLAIIGRFLSG-----  
GNFTNKTYHINNNNGVMFFDLYTFIQTE-  
RLDSYKLDNISKNIIFNCNAI IKDISDDIITMEAGINENTKDKISIF-  
SEVLQTGNYITIGNSDISKIVYKDIRSDSF-----TIKVVSNKPYEC-----  
GSIQFISFGKDDVLDLRS--MYANYNLDIALDMEKYCIHDACLCKYIW-  
DYYKIPSKIDAASSTYMLPQKSALEYRASTLIKGPLLKLLEEK-----  
VYVIREASKVRYPIGGKVFPL--SQKTFENVMIFDYNLYPNVCIYANLSPEKLVCIL-  
LNSNKLESDINLKMMLKRKYPYDPYVCMCDSRIEY-  
YSEIIVYDRRNKGIIPKLELFIKRKKYKSLLEA---TTTIE-----  
TTLYDSLQYIYKIIANSVYGLMGFHSSSLYSYSAKTCTTIGRNMIT-----  
-----YLDS---VINGAVWENDKLILADFPNIFSDK-----TMFSKEIEVP-PMNE-  
TFKFRNVYGDTSIFTEISNRD-----VEKTIKI AKI---LENIIN---  
TKILHANFKI-----  
EFEAV-----  
YTQLILQSKKKY-----  
TTIKYLADYKPGDKPIRVNKGTSERTRDVALFHKQMIQKYKDLLMKMLMEG---K-NQQDITRDILQH--  
LEVEMVSEF-S-NNKEFT--  
KYLLSRKHHNDYKSATHSNFELVKQY-----  
NLINTE-KIEIGERYFYLYVCDIT-----LPWQKK-LCNIQSYETIADSKY-FLPS--DKRIFYEVYF-  
KRIASEVVNLLT-DKTQCILFFNRLFGTR-----PVFSSD-----  
>u1\_Orfvi41057088

MLFEMELKCLNWF----ENRSNDSRFLFLKARRAD---  
NAVYYLRFVQHFYYVVRADAVADIAQPLAWTRALG-----PMSVVSIDEIVA--  
RSAKIPERQRSE-IELCLVASERKL-APPEVFMDFLNVSWFFVA---HDIDPDGCRYVDP--  
ALLRDLGS-----NCFHCDNPGACFAEKI-PRFNVF-----  
RSGFLDIECHFEEKFPSVFKNAVSHISF--CVVDKDGAEKR---

FTLTNSDMLSDADLEEAARREIPVCLDPADVCFDA-----EVTLC-PEVTLLRVAKRLLM-  
PLDFVVFVFNHNFNDFLRYSRLSLLTGEHIRFRLPDGTETVNFVYERTKSSHKGV-  
GGVSSTTFHINNNNGTIYFDLYAFIQRTE-  
KLDYKLDIAISKNAFHCTAVVEDARPDVRFVFRGDRSTDADGNAAVF-ARVLSTGNYVTVDERVC-  
RVLHKRVDDEGGF-----TVDLADSAARAP-----GDRVTLAFGKDDVSLAD--  
MYANYSLDVCLDMARYCLHDACLCLYLW-  
SHYGVETKIAAAASTYLLPQSVVFEYRASTCIKGPLMKLLENR-----  
TVMVRADTKSKFFYEGGRVMVP--KQKMHDKHVLI FDYNSLYPNVCIYANLSPETLVGVV-  
VSDNRLDAEVAADVRRMFPAPRYIAVPCPRPEL-  
VAEVAIFDREAKGIIPMLLSFLDARAKYKLMKAA---ETAVD-----  
REIYNSMQYTYKITANSVYGLMGFRNSALFSYASAKSCTAIGRTMIA-----  
-----YLER---TLDGASVCGTRLSLAAAPDNPLL RDEAFAGRAAELEIDA AVAGERTE-  
RVGFRSVYGD TDSVFLEVGASD-----IAFSRRVGRG----LERVIN---  
EHVLFANFKV-----  
EFEAV-----  
YCNLIMQSKKKY-----TTIKFAVS--  
DGGGSERVSKGTSETRRDVAPFHKLMIRKYKDMLCRALAE---G--SGNVGVEILRS--  
LEDELTFEFA-RSMPLD--  
WFLSRTHHKNFKSPDNPNVALVTRY-----  
NAANAE-AIEIGERYFFAYVCEEG-----PWRRR-IANVKS YERVVDKTF-KLDK--NERIMYEVYF-  
KRLCTEIVNLLD-NKAMCTLFFERMFGSK-----PVFTG-----  
>u1\_Mo1co9628971

-----  
MEIRCLNWF----EARG-EERALYLKAKTRA---  
GDTL FVRFPHYYYYVVDGGT LSTLAPPRAASALG-----  
EFELACIDETLARADALHAPTRPR---SQLWLLEEAQPR-QIAGALLAEFMHITWFFLR---  
NEIEPNGCYRVPD--AELEPVCA-----RCFHCAAPRRAFATRV-PLFEVT-----  
HTYLFDFDIECQDFDKKFPVSNPVSHISF--CYVDRLGTEVR---FSLNLSDLLSEDSL-----  
RGCRRIATPDEFALP-----GVTFC-SEVLLQLTKRLLER-  
HDFDIVTFNGNFDIRYVSNRLQLLTQSSVCFRLPDQREPVKLVYIERSLASHRGA-  
GGMANTSFHVNNNGTIFFDLYTFIQKAE-  
RLDSYKLD SISKNVFHCRRARVLDAGAGECTLAGGPDANAEDRLRLF-  
CEVLQGTGNYVTLDTVHVCRILGKRFFEHGF-----ALRVRCAESYAP-----  
GSLCELAFGKDDVDLRE--LYRHYSLAAALEMERYCMHDA CLCKYLW-  
SYYRVPSKIDAAAATYLLPQCLALEYRASTLIKGPLRLMLRER-----  
VVYVRTQEPARYTYGGKVFLP--RQKLFDTNVMVFDYNSLYPNVICIFGNLSPETLVGVV-  
ANAHRLDAEINMQELRRRFPEPAFLHVLCEARARDG-  
YSEIAVDFRRRQGIIPKLLGTFMEQRARYKALMRAA---SSGLE-----  
RTLYDSMQYVYKVVANSVYGLMGFYNSLSYSSAKCCTTIGRVMIT-----  
-----YLDR---VVDGATLCAGVLR LAAEPRNPLLAS-----APPRARDVDSAALGHEL-  
ELRFRSVYGD TDSIFLELNLRE-----VQTTLAVART----LERVLN---  
EHVLFENFRV-----  
EFEAI-----  
YQNLILQSKKKY-----  
STTKYAADHRAGDAPEHVSKGTSETRRDVSRFHKLMISRYKAQLVALLAEA---RLSSRQVCIEMLR--  
LEVDLFAEFAA-RAQPLE--  
MFLLSRMHHRNYKAPDNPNVELVNRY-----  
NRENLE-PIELGERYYYYAYV CASE-----LPWQLA-VANVRNHERIVDASY-VLPE--RERVFYEIYF-  
RRLATELVNLLD-NKPLCAEFFTRLFGVR-----PVFSN-----  
>u1\_Squvi549059641

-----  
MKIYSANKMDVKCVNWF----ESRG-ERKYLYLKARTRE---  
GAAVYFRFNRYFYVVSEATLASLAPPAHRAEPLG-----RMSIIDIDEEVS--  
RDANLRPRPRE-EDLWLVAEPHRR-SIVGAYMTDFLDVTWFFIA---NEIDPCGCYAVDE--  
SLLEEVRA-----GCFHCEDPKRCFAARI-PRFDVQ-----  
RTYLFMDIECHFEEKFPSVFTNPVSHVSC--CTVDRTGAEFR---  
FTLLNEEMLSEADRAEALRRGCVRARSATEADLSR-----EVLVC-SEVVMLQITRLLIES-  
AFDFVVTFNGHNFDLRYVANRLELLTGESVTFRLPDHSETVKLCIYERNLLSHRGQ-  
GGVANTTYHVNNNGTIFFDLAYAIQKSE-KLDSYKLDISKNAFHCRARVTEAVGDCCVFEGD---  
DAPSRVRAF-AEVLSTGNYSITADGVY-KVLEKRVADGRF-----ELRVRFGAAA-----  
GETHELSEFGKDDVDLAA--MYRDYDLDALEMARYCVHDASLCKYLW-  
HFYGMETKTDAAAATYLLPHCLAFEYRASTLIKGPLLRMMLEQR-----  
KVFVRNARKTKFLYEGGKVFAP--RKKMFENNVAVFDYNSLYPNVCIFGNLSPETLVGVM-  
VSGNRLEAEINAQELRRRYRPPRFLCIECEPRSHDF-  
VNEVAVFDREAEGVIPMLLRSLDRRAEYKMKMSA---SGPIE-----  
RGIYDSMQYTCKIVANSVYGLMGFRNSALYSYASAKSCTTIGRRMIT-----  
-----YLDS---VMDGAAVCGGEVLLAAPPLNPFDD-----GRDQSAAVAIDVDPSV-  
AMNLRVTYGDTSVDFVEMSTKD-----VAVTQRVARE----LERVIN---  
QRVLFANFRV-----  
EFEAV-----  
YSRLIMQSKKKY-----TTMKFAAG--  
SVADPERVSKGTSETRRDVSRFHKEMIKSYKTRLTDMLSEG---GLSSQAVCVSVLQS--  
LEQDMRLEFER-RALPLE--  
MFLLSRTHHCNFKSPDNPMALVMRY-----  
NSENPE-VIEIGERYFFAYFCDA-----LPWQRR-LENVKSHERIVDRGF-RLGA--DQRIFYEVYF-  
KRLATEVVNLLD-HRELSVQFFTRLFGTR-----PLFYD-----  
>u1\_Vacvi66275862

-----  
MDVRCINWF----ESHG-ENRFLYLKSRN---  
GETVFIRPHYFYVVVTEIYQSLSPPPFNARPLG-----KMRTIDIDETIS--  
YNLDIKDRKCSV-ADMWLIIEPKKR-SIQNATMDEFLNISWFYIS---NGISPDGCYSLDE--  
QYLTKINN-----GCYHCDDPRNCFAKKI-PRFDIP-----  
RSYLFLDIECHFDDKFPSVFINPISHTSY--CYIDLSGKRL---  
FTLINEEMLTEQEIQEAVDRGCLRIQSLMEMDYER-----ELVLC-SEIVLLRIAKQLEL-  
TFDYVVTFNGHNFDLRYITNRLELLTGEKIIFRSPDKKEAVHLCIYERNQSSHKGV-  
GGMANTTFHVNNNGTIFFDLYSFIQKSE-  
KLDSYKLDISKNAFSCMGKVLNRGVREMTFIGDDTTDAKGKAAAF-  
AKVLTGNYVTVDEDIICKVIRKDIWENGF-----KVLLC-PTLP-----  
NDTYKLSFGKDDVDLAQ--MYKDYNLIALDMARYCIHDAACLQYLW-  
EYGVETKTDAGASTYVLPQSMVFEYRASTVIKGPLLKLLETK-----  
TILVRSETKQKFPYEGGKVFAP--KQKMFNNVLI FDYNSLYPNVCIFGNLSPETLVGVV-  
VSTNRLEEEINNQLLQKYPPRYITVHCEPRLPNL-  
ISEIAIFDRSIEGTIPRLRFLAERARYKMLKQA---TSSTE-----  
KAIYDSMQYTYKIVANSVYGLMGFRNSALYSYASAKSCTSIGRRMIL-----  
-----YLES---VLNGAELSNGLRFANPLSNPFYMD-----DRDINPIVKTSLPIDY-  
RFRFRSVYGDTSVDFTEIDSQD-----VDKSIEIAKE----LERLIN---  
NRVLFNFKI-----  
EFEAV-----  
YKNLIMQSKKKY-----  
TTMKYSASSNSKSVPERINKGTSETRRDVSKFHKNMIKTYKTRLSEMLSEG---RMNSNQVCIDILRS--

LETDLRSEFDS-RSSPLE--  
LFMLSRMHHSNYKSADNPNMYLVTEY-----  
NKNNPE-TIELGERYYFAYICPAN-----VPWTKK-LVNIKTYETIIDRSF-KLGS--DQRIFYEVYF-  
KRLTSEIVNLLD-NKVLCSFFFERMFGSK-----PTFYEA-----  
>u1\_Yabdi12085022

-----  
MDVKCINWF-----ESKG-DNRYLFLKARNKE----  
LETFIRFPYYFYALTDDVYKSLTPPAFKSVFIG-----KMTNIDISENIS--  
YVSEETRKKVD-VDMWLILEPKKR-IIANTIMNDFLNITWFYIL---NKICPDGCYSMDV--  
KQLEKIND-----NCYHCDEPQKLFNAI-SKFDVL-----  
RSYLFLDIECHFEEKFPSVFTNPVSHVSC--CYINLFGKELK---  
FTLINKDMLSEHDISKAKELGYEINSTSEMDYSK-----EFVFC-SEITLLKISKLLEL-  
SDFDVVTFNGHNFDRYISNRLELLTSGKIYFKSPDKKETVHMCIYERNLSSHKGV-  
GGVSNTTYHVNNNGTIFFDLYSFIQKSE-  
KLDYKLDISISKNAFSCNAKIKFVENSYYTFMGNSLTDVKGKSLLF-SKVLSTGNYITINDEVY-  
KILKKETYDDEF-----TVTICKCNKLDI-----DNVYCLSF GKDDVNLS--  
MYANYNLQISLEMGKYCIHDACLCKYLW-  
DYYGVEKKTADAGASTYILPQSMVFEYRASTLIKGPLLSLLETK-----  
TILTRTEKTKFPYEGGKVFAP--KQKMFINNVLIFDYNLYPNVCIFGNLSPETLVGVF-  
VSNKLEAEINKQELIKKYPYISINCEPRSPDL-  
VSEIAVFDRDIEGTIPKLLKFLAERARYKLLKES---SSSTE-----  
KAIYDSMQTYKIVANSVYGLMGFRNSVLYSYASAKTCTAIGRMMIV-----  
-----YLSN---VLNGSSVSFKKFNAELPLNPFED-----GRSVTSTTDIDVNEKY-  
NFVFRSVYGDTSVLEMNTQD-----VDISIKIAKE----LEKIIN---  
QKVLFCNFRI-----  
EFEAV-----  
YKNLIMQSKKKY-----  
TTLKYSSNSTGKSVPERVKNKGTSETRRDVSRFHKEMIKTYKTRILNMLSDG---SMTSIQVCVDVLKS--  
LENDLKIEFEL-KSAPLE--  
MFLLSRTHHCNYKSHDNPNMFLVNEY-----  
NKNNPE-TIEIGERYFFAYICPAE-----DPWQKK-LINIKTYEKIIDRGF-KLKQ--TDRIFYEVYF-  
KRIATEVVNLLD-NKVLSTSF FERMFSGK-----PIFY-----  
>u1\_Myxvi9633670

-----  
MEIKCINWF-----ESKG-DKRFLFLKARNKN----  
LETIFVRFHYFYVVTEDVYKTLVPIPTASIFLD-----SMSIVDISEYTN--  
NYVSDVTRKKT-ANIWLKENKKR-NIPKVVMDEFLNITWFFIS---NDVSPEGYRIDV--  
SKLEKLN-----KCYHCNDPKDLFSNPI-SRFEVP-----  
RSYLFLDIECHFKNKFPSVFINPVSHISC--CYIDLSNDEYR---  
FTLLNEDMLTEDEIHEAVSRGYHRAESYNDVDYKK-----EFILC-TEITMLRIAKLLEL-  
SDFDIVTFNGNFDLRYVSNRLELLTDERIIFKSPDRQEVVHLCIYERNLSSHKGV-  
GGVSNTTYHVNNNGTTFDLYTYIQKSE-  
KLDYKLDISISKNVFNDCVLTETIQNDTMTFVGHTTDAKATVNVF-SQVLSTGNYINIGDDIF-  
KVFNKITKDSF-----TLTVKANPSYTV-----HNTYTLSFGKDDVNLS--  
MYKNYNLDVAVEMGNYCLHDACLCKYLW-  
NYYGIETKADAGASTYILPQSMVFEYRASTLIKGPLLSLLEK-----  
IIMTRSEKKNKYPYEGGKVFAP--KQKMFINNVLIFDYNLYPNVCLFGNLSPETLVCVF-  
VANNKLEAEINKQEIQKMYPGPRYISVQCEPRSEDL-  
VSEIAVFDRSVEGIIPKLLKTFILTERLKYKMIKET---NDVVE-----  
KAIYDSMQTYKIIANSVYGLMGFKNSALYSYASAKSCTAIGRQMIH-----

-----YLN-----VLNGCKLSSGKFQLAAYPINPFFQD-----DRSVDLYASTNLPTEY-  
NYDFKGVYGDTSVFLINTND-----VLTSIKIAKE-----LERVIN---  
TKVLFDFNKI-----  
EFEAV-----  
YKNLIMQSKKKY-----  
TTLKYVPSSTQNSIPVRINKGTSETRRDVSKFHKYMIKIYKTRILEMLSDG---TSSSLQVCINILKS--  
LESDLLIEFET-RKAPLD--  
LFLLSRTHHCNYKSIDNPNMYLVNEY-----  
NKNPE-RIEIGERYFYAYLCAK-----DAWQKK-LVNIKTYERIIDKGF-TLGS--TDRIFYEVYF-  
KRLATEVVNLLD-NKVLSTSFPEKMFGR-----PIFYN-----

-----  
-----  
NCVOG0076, DNA or RNA helicases of superfamily II  
-----

-----  
>ASFV\_9628229  
MEAIISFAGIGINYKQLQSKLQHDFGRLLK-ALVTARAL-----PGQPKHIAIRQET--  
AFTLQGEYIYFPIL--LRKQFEMFNMVYTTRPVSL--RALPCVETEFPLFNYQQEMVDKIH---  
KKLLSPYGRFY--LHLNTGLGKTRIAISIIQKLLYPTLVIVPTKAIQIQWIDELTL-LLPHLRVAAYNN-  
AACKKKDMTSK-EYDVIVGIINTLRKKP--EQFFPEFGLVVLDEAHELHSPEN-----  
YKIFWKIQLSRILGLSATPLDRPDGMDKIIHHLG-----QPQRTVSPTTTFSGYV-  
REIEYQGHPDFVSPVC-INEKVSATID-----  
KLLQDPSRIQLVVNEAKRLYSLHTAEPHKWGTDEPYGIIIFVEFRKLEIFYQALSKEFKDVQIVVPEVA  
L--LCGGVSNLTAQSASIASIILLTYGYGRRGISFKHMTSIIIMATPRRNM--EQILGRITRQG-  
SDEKKVRIVVDIKDTLSPLSSQVYDRHRIYKKKGYPIFKCSASYQQPYSSNEVLIWDPYNESCLACTTTP  
PSPSK-----

-----  
>SGPV120  
---MASGKKNMRTCGKLAKNYIDLISKNTF-EKGILTWDAEHSNEQ-ENPIILTKVRPDI--  
SIVIPLGYWSNP----ILKNYPKID--YNMTTLLIP--DLKYK---  
EIELRDYQVTPYSIISSTIDKIEESRPCFLRLIMPCGFGKTMMAVKLIQELKIKTAVILWCTSLMTQWM  
ESLK--FGGITDVVGSQGSIPDTLELINLK-  
YPDIIIIITAAHLVRRDCRKLISQYDMIFIDESHKYNNVNLKFLHFYPCPFTFFLTATPRVINSFY  
CNDILSFCKDN-----KILKKYRVLSSSTSSVM-----SEQTKKIYEGYDSVKDRYK-MMRGM-----  
VLEKDYRLEYIETVKDYFADDMFDC-----GIVLTKSRNVMKILFNSLLEEF-  
PEHVYVADAETKETQVLLQYLKKK--  
KCFILVSTFQYAGTGLDLPNLDAVFFSSPMISRVDVIQSAGRVSRFNPKKPIRLAVVFNVSILNWINIM  
-RKGSKLVTE-----TLSS---  
LDWVEDISVPK-----

-----  
>u2\_Me1sa9631473  
-----MLYSKLSPALHAALRSRIN-NNSVLCYDIY-----  
MNPIIYNDPNTVNNTLIRIPPR-----MLKNYDKIS--FNLKSISNE-SLEIS---  
NLELRHKQKHIFNKIL-  
EIYNINESNKPLYISLVCPCGFGKTILSIAIINKLKFKCVIIAPMKFIVSQWVDKINIFNKDLKIYSSID

G-  
IKKALKDIKNGLDICDPDKHLQNDIYNYIYENFSIIIDEIHKYNLNDILMTKFLYKNYFKMCLL  
LTATPADNMNLFVTHMIKANGEQ-----NQTKNILSVESKDIN-NSFSNNSINILLNRK--  
QDKFKEVYMKNYNYKMCISKDDMRNNCIVDIIHKCFHDDT--K-----  
ALILTDYRDHMIYLYNKLKSII-NDSVYLYDVKQYKNSVSSLNEARNK--  
NNFIIIVSTIAACSESLDLQSLNTHITLPITNKTIIQAIGRIFRTNVKDDNKVYNYNISFIDNIIRMF  
INDKYYNIKK-----  
QIDNDEDKKWIINKIYI-----  
-----  
-----

>u2\_Anocu578887634  
-----MNLIIYKHMNDKLYGLFYEKLK-TQHILCYDSD-----  
NNPYFLNKENKNILKNIIIPPSIISDLNL--QIHN-----LNNDTIN---KNIQS---  
NIILRDEQRIIVTKI-----  
EELYSNFIPVYVLLLEPCGCGYKTIISIELICRLKLCIAIVVPRKFIIQQWKDFN--TNTFNIFTSFNG-  
RVDIAKINITNGLDCIFICDPDKHLENDTIRNFYTYFNFIIDEIHKYDLNKDIAMTKFLYGYFKLVLL  
LTATPKNNINLIINNLIKINKIDT-----QIKKEIYSFELPMKIN-DSNITSECKKFLSKIN--  
LNKYNNLYTKNYIFKYCISLDMRNNTITQIIKQINDTT--K-----  
AILLTDYRNHMHELYTLKSEL-TDIIYIYDVKD--NKYNLFSELECK--  
NKFIIISTIAACSESLDLTNLNTIYLVLPITNKNLSLIQCTGRIMRTS--  
NENKYIYLFNFSYLNDIIRTFINDKCNFVKR-----ILNN-----  
WEYNIYNDIYIT-----  
-----  
-----

>u2\_Mytse506497800  
-----MVKYIKLSKNLYKLFKSKIK-SNEILVFDTYHNSIITKDIMDTIESSDL--  
NIICPIFLYNKTDK--VISNIYKIN-----TNINC---KFTLRELQLEIINKIL-  
NINSNYLLHSPLYISIVPCGFGKTIIGIDLICKLKYKCVIIVPRKFIMTQWKEKFE--ESSI-  
IFTSFNG-  
RKEAIEKIKNGLNCDIFICDPDKHLEDDTIKSYIYNNFSMLIIDEAHKYNLNNNISMTRFLYNGIFKICIF  
LTATPTNNMNAMINENIVITDQNTENI--NITKRLLIFELKNNKF-NKF-NNKCQQFINKIS--  
NNNFNTVYIKNYKYCISLDDNRNNTIMELIKKITSVNT--K-----  
GLILTDYRTHMYDIYNLLKNTTLKDIIYMYDVKD-  
KNCNNLLSNLKNNSKNYLIISTISACSESLDINNLTFFHLLPITNKTTLTQCIGRILRDY--  
NEDKLVCVYNSYINNIKTYINDNTMLIKK-----SLSE-----  
WECSELKCD-----  
-----  
-----

>u2\_Amsmo9964373  
-----MVKYIKLNKKIFNYIKSRLK-SQEILYDKNSNHAIITNDMIENI---DL--  
DIICPLILYNENDK--IIDKINMD-----KFIEC---KYQLREDQLELINNIM-  
NINNYSNSPIYLSLVCPCGCGYKTIIGIDIISRLKYKCAIIVPRIFIIYQWLDKIK--QKN-  
NIFASTCG-  
RKAIEIQKNGLECDVFICDPDKHLENDIIRNYIYNTCSLVIVDEAHRYNANKNIVMTRFLYKIFKFLF  
LTATPSNNMNTFINEFIDINNQSQIKILNDIKKLLIIFNLKDKIF-TPI-NNNCKYYYVNKIT--  
NNKFNNIYIKNFYKYCISLDDKRNEIIDLILKTTDNT--K-----  
CLILTDYRLHMMNIYNLLKKTHLQNIYIYDVKN-KKCNDLLTEIKNK-

NEKFIIIISTISACSESLDINNLTNFHVLLPITNSKTIKQCIGRIMRNM--  
NEDKYTYIYNFSNINNMIMYINDKTDLIRK-----VLSD-----  
WECVEIKCSY-----

>u1\_Nilcr115531805

-----MPKMSRYVVIDDKLYSAIRSLIG- IKELYLFNS-----DGDFVEVHKRSGF--  
RFLIPVGYTSLAV--PADRE--YD--YGDNDLPP--DQRPR---  
LPELRPAQRVVAEIAARLEKLRERPLYTLLHLACGFGKVTASFLIGSHAKRAVVVLPNKLLSAQWE  
EVVA--RLGVPYAASYEG-VSKLLPRLRDR-  
DYAVLLVIDRHFTNKEFCRLVHERYDVFVLDDESHTYDLRNTAMTRFLTFFYPPRIAYFLTATPRQSNALF  
CNERVNVTVAS-----SLRRHLRVVK---EYYCREYRTPKMAAYLARLDSPANKYH-VITEK-----  
AIAEDRYRNETIVKTLAEHYAAGSVDA-----  
VLVITRTREHMFRLRDGIAALVDPASVFGDAEK-RETAETLQALQTR--  
ERFVLVSTLSYSGTGMNLPGLDALFYTVAVSNSRNIEQALGRILRDG-  
PRKDRYLFVFPVTSVRRLAGCLEGHTAR-VEH-----VARQ---  
LGFG-----

>u1\_Canvi40556195

-----MSYITVIDDKLYSSLRKLIG-YSPLYLFTE-----EGKFVEVVKNSEF--  
KFLIPPGYFSNPV--PLNGLK-FS--HGTNWMKD--KHKVT---  
LPELYPIQKRVIDEIVLQFSKKSKEKRPLYTLLHLACGFGKTITASYLIGIHKNAVISVPNKLILRQWE  
AAIK--ALKVSYISHEG-VSKLLKVLSE-  
SFSILVVVDKHFTNEEFCKYVYENYDVFILDEAHVYNLMNESTMTSFLCYPPRICYFLTATPRQNAIY  
CNSIINFIFKS-----PLQKVLHIK---EFY-NEYTSPTIKNYISQLQTPSNKYH-LYTEK-----  
ILAEDIHRNKTITDKIIETFRSNGNR-----ILVITKLRNHMFTIYNSLHPVL-  
GNCVYIGDAQK-KDTTEMIKELRTL--  
DKFILVSTLHYAGTGLDIPNLDLFCNTVMNSMQTEQVMGRICRETGSSPTRSIFLFISTSIKDIKSLV  
GVFTQRFAQQ-----ATK-----  
LGFREITQIT-----

>u1\_Vacvi66275935

-----MSLLKMEYNLYAELKKMTC-GQPLSLFNE-----DGDFVEVEPGSSF--  
KFLIPKGFYASPSVKTSLVFET-LT--TTDNKITS--INPTN---  
APKLYPLQRKVVSEVVSNMNRKMIESKRPLYITLHLACGFGKTITTCYLMATHGRKTVICVPNKMLIHQWK  
TQVE--AVGLEHKISIDG-VSLLKELKTQ-  
SPDVLIVVSRHLTNAFCKYINKHYDLFILDESHTYNLMNNTAVTRFLAYPPMCMCYFLTATPRPANRIY  
CNSIINI AKLS-----DLKKTIIYAVD---SFF-EPYSTDNIRHMMVKRLDGPSNKYH-IYTEK-----  
LLSVDEPRNQLILNTLVEEFKSGTINR-----  
ILVITKLRHMLVLYKRLDLFGPEVFIGDAQN-RRTPDMVKS IKEL--  
NRFIFVSTLFSYSGTGLDIPSLDLSFICSAVINMMQIEQLLGRVCRET-  
ELLDRTVYVFPNTSIKEIKYMIGNFMQRIISL-----SVDK---  
LGFKQESYRKHQESDPT-----



SVCTTSSREERVLNRI FNSQNR-----  
-----

>u1\_Yabdi12085093

-----MSVCTEIDYKLYTELKKIAG--NSLFLFNE-----NGDFTEVVLNSSF--  
KFLVPIGFFSSIDI--PLKKPIEYK--NNNNNIEH--SKNII---  
LPNLYPFQKHVSEVLLSMEKKNKHKRPTYITLHLACGFGKTITSCYLLSLHKKKAVICLPNKMLINQWK  
RAIE--SINMDHIVSVDG-VSNLLKEMVKK-  
TADILIIIVSRHLLNEEFCKKIYLNIDIFILDESHMYNLMNNSAVTKFLTYPPKVCYFLTATPRKVNRIY  
CNDIINVSNSL-----ELKKYIKIVE---FFF-ETYSSDTIKQMVKKLNTNYNKYH-MYTEK-----  
ILAEVDP RNELIDTIIYDFNKMLINR-----  
LIIIVTKLRKHMFFYDRLSEKFGLDVVYLGDAKN-KNISDIVKKIKSI--  
DRFIFISTTNYSGTGLDVPTLDSLVICSAVMNSMQIEQILGRICRSS-  
VSKTRTVIVFPNTSIKEIKHMGVFFTKIITL-----AIEK---  
LNFKKIEKGGKKEL-----  
-----

ALCKAFNLQTH-----  
-----

>u1\_Myxvi9633744

-----MSVCSEIDYALYTELKKFLN-SQPLFLFNA-----DKNFVEVVPSSSF--  
KFYIPIGVFSNSDV--ALIRPV-HT--TCTNHIE---SADAT---  
FPNLYPLQKRVAEVTSMRQKLSTHRPMTLHLSCGFGKTITACYLMVVHRRKTVICVPNKMLIHQWK  
AAVE--LTKLSYIISTDG-VSVLLKQLRTK-  
TADVLIIVSRHLSNDYFCKKIHDYDTFILDESHMYNLMNNSALTKFLTFYPPRICYFLTATPRLANRIY  
CNDVVNVLKVS-----TLMKRLKIVE---YFF-EPYSTE CIRQMAKHLNTENNKYH-IYTEK-----  
ILAE DLPRNNLIVDTVSREFKHGLVER-----  
VIVVVVTKLRKHMFFYDKFVEEFGTDYVYLGDAKN-KDTSAVVKSLLQK--  
KKFIFVSTSHYSGTGLDIPSLDSLVIICCAVLNSMQIEQLLGRVCRES-  
ESVKKTVFLFPNTSIREIKHSLGFFTERIVSV-----STDK---  
LGFQQEGKEGKKEEP-----  
-----

ALTCAFSSQIR-----  
-----

>u1\_Orfvi41057158

-----MFGGVQVDDKLYAYLKKLAGRGRPLCLFRD-----NGEFVEVFAGSAF--  
RFVLPVGLFADLRV--RTRGVA-FPKLRDSARMRGVRVDAHT---  
LPSLYPNQRIVVDEVLAAARDQLLAAGRAVYVTLHLACGFGKTLTACHLIATHGRRAVVCVPRMLVPQWR  
AAVA--ELRVPFVAVSCDG-AASLLRSGELD-  
RAMVAIVVSRHFANDDFCRAVSRQFDVLVLDESHYTNLMNNTAVSRFLTKYPPPMCFFLTATPRTANRIY  
CNRVVNVSVVS-----RLTKVVRVVD---AFF-EPYTPKIRTLERSLEGPQNKYH-VFTEK-----  
ILGEDVHRNKLIVDTVVAAMAAGEARR-----  
VLVLTKLREH MVGLHAALRERLGAETVFLGDAKN-RKTPEVTRALRDK--  
DRFVLVSTVFFSGTGLDLPNLDALAVAAAVLNRMVMEQMIGRVCRES-  
HANTRTLFVFPDSSVRAIRD TVSAFAQRLVAL-----AVDG---  
LGFVRERSAAGAKNEPA-----  
-----

LYSAISGRDLAAV-----  
-----



NTLIIFFDDVGNN-----FRNKLNFTNECRHAFISTIFLVHKEIHLDPDTRDSMKFFV-  
INKKTIDLKYIIPNT-----SIR---KEISKDIVPLLLQYEKKFGLYIVIDNV-----  
HAELFYIYISEDEM-----KNLDNNYFLLSTESSMKQ--  
IILEKIKK-----

>u2\_Anocu578887621

-----MIEEKIDYDKIISTPFNMAILGKTGSGKTTFLKNFLIETR-  
EKFDFIYLVTRSKTCYDSNNYHHYIYPNHVLY---LDQKDNFNSS-----  
DIKAKLSIFLDNI-----  
KKFSFICLEQNDKC-----  
NTLVIFFDDVGRE-----TKDKLSNFTNECRHSRISNIFLVHRLEHIDKTTTRDSISLYV-  
INSPNINLEYLEINK-----SIK--TMINTSILNAFSE-YNKERGLFLIIQ-----  
DSKVYSLVINDSTI-----KTINESARNVLYTNSIIKQ--  
YIT-----

>u2\_Mytse506497908

-----  
MVSEFDYNTLRKNPFNMAVMGKTGSGKTTFLKNLLLKIGVGHFKFIYLITSSSEVNYKANNEYHKYIYPNHV  
FY---LNKDTN-----NIKILLGSYLKKI-----  
RNFSYDNKDLIGVT-----  
NTLVIFFDDIGKE-----TKEKLENFTNECRHSNISNIFLVHRLEHLDTTTRDSITYYV-  
INSATENLDYMQCNK-----TIK--NEIMTDVINTYN--EYNGKGLYVIIH-----  
ESIVYTSLIKQEDI-----DNIKKEDKYVFCTESYIKK--  
FILSE-----

>u2\_Amsmo9964464

-----  
MSEFDYDKLRAKPFNMAIIGKTGSGKTTFLKNLLLKIGYGFYKFIYLITSSSEVNFKSNEYFKFIYPNHVF  
YLYSNNKDK-----DVKYLLQAYLEKI-----  
KNFSFEMNQKCENF-----  
RTLVIYDDIGKD-----TKDKLSNFTNVCRHSLVSNIFLVHRLEHLDTTTRDSLSYHV-  
INSESENMDLIPCNK-----NLR--NSLLASVINIFKDREQSKYYIYCIY-----  
DSVSYSLISDDDL-----ENIKNEDKYVFYTDVSVIKS--  
HILN-----

>SGPV068

-----  
MTTSEFDRNLLKAEPFRAAFLGSSGTGKTTYLFSLFDTDIKNHFNYVYCVSTELNFIKQ--  
YSSHIWPKFIAHDRLSLGS-----  
GKDMGVSSVLQSILEEIMNFAADLVKKRYIERSEKNTK-----  
-----ILIIFFDDCDSI---  
LTKNEGIKTFLTRCRHVNISIIVLIQDLTQIPPMWRNQLSHLFFFGQVSEKSRKIITGQAGFNSVCDSQL  
RMIATIDPGHF--SLKGSPLVLVKDN-----SKAVFKDRANHDTV-----KGKYKLD--FLFYRSQKQK--  
KFLEWYKTNR-----TKTLTLDLKRALKTNFLA

>u1\_Nilcr115531818

-----MVSRIEEVRFDRNSLLADDFRLVFLGGSGSGKTVYLLSLLRGMV-  
RKFRHVFLMLPVPNSA-----YDGYVWPDHITT---VANEH-----  
QLDYALLRYKAFA-----  
EELAKSASRRKA-----  
VLLVLDLGD-----  
QYRSRELAPIFNHGRHVNISVAVLCQTFRHIPHSCKTSITHLVCCSVVMNDLENLLKYM-----  
SVAVEKLLRFVDMFCS--NNKRRKVLIVENSLFSGGRARVCTDVVDKRVL-----AGELDL-  
VLRAQFSRMRA--NLKEAIEEP-----

>u1\_Canvi40556209

-----MDIVREVKFNRTSLLSDYFRMVILGGSGSGKTTYLLSLFKTFV-  
NKYKHIFLFTPLINPS-----YNYVWPDHVYK---IADFN-----  
ELEYALMKMRDDL-----  
TNLEKKGSSNHD-----  
FLIILDDLGDGDA---  
QLKSKILPWLVTGRHIRMSIVMICQTYRHVPTNCRSSITHLCCCNVSDADVENITRSM-----SLL-  
TTKPIIRALSVMRT-ASKGKKVYIIENTVFSRDRVRYCYDTADKAVI-----NKVNDIS-  
ILLKQFSHMKRIDQLLSIIEEKDQENEKKSQESITNSKTENKISPLKQKQDSNLSV  
>u1\_Vacvi66275952  
-----MNCFQEKQFSRENLLKMPFRMVLTGGSGSGKTIYLLSLFSTLV-  
KKYKHIFLFTPVPYNPD-----YDGYIWPNHINF---VSSQE-----  
SLEYNLIRTKSNI-----  
EKCIAVAQNHHKSA-----  
HFLLIFDDVGDGDA---  
LSKNTLIEFLNFRHLNTSIIILLCQTYRHVPILGRANITHFCFNFNISISDAENMLRSM-----  
PVKGRKRDILNMLNMIQTARSNRLAIIIEDSVFCEGELRICTDTADKAVI-----EQKLNID-  
ILVNQYSHMKK--NLNAILES-----KKTCLCNSDQSSSSKNVSS  
>u1\_Yabdi12085104  
-----MNRFEKHF SRKSLLKYPFRALVGGSGSGKTAYLLSLFNTLV-  
EQYRHIFLFTPVPYNSE-----YDSYIWPDHVNR---VSTSE-----  
ELDYALITTKQKI-----  
EKYVKNRGNKNAEM-----  
FLLILDDMGDK---  
QIKSSCLLDFLNHGRHLNTSIIILLCQTYKHVPVNGRTSITHFCCCNVSDSDIENMLRSM-----  
SITGSKKDLLKCVSLLRAISVHKRRVIIIEDSVFSEGEQRVCYDTADDNVI-----QNNVNFS-  
ILLKQFSHMKK--KLPSILSTYTK-----  
>u1\_Myxvi9633756  
-----MNRFEKQFSRKSLLRSPFRIALVGGSGSGKTAYLLSLFDTLV-  
TKYKHIFLFTPVPYN SA-----YDSYVWPDHVNK---VTTP E-----  
ELDYALITTKQKI-----  
EKYVECKGTTKADM-----  
FLLILDDMGDK---  
QTKSSCLLDFLNHGRHLNTSVVLLCQTYKHVPVNGRTSITHFCCCNVSDSDIENMLRSM-----  
SITGSKKDLLKSIKAVSVNKRRLIIIEDSVFSDGEQRVCYDCADEDVI-----AHKIDPS-  
ILLKQFSHMKH--NLSKILSSHVKK-----  
>u1\_Orfvi41057171  
-----MDVVQEVRFKRESLIEAPFRMALVGGSGSGKTAYLLSLFRTL V-  
RRFKHILLFTPVPYNAA-----YDGFVWPDHIHK---VTTHE-----  
ELEYNLSVAKRKI-----  
ERHAQTKKQK-----  
FLIILDDMGDT---  
QTRSPTLLGLMNYGRHINVSLLCQTYKHIPVNGRASITHLCCCNVSDSDVENVLRSM-----  
SIRGSKKRLIRAMAIR--SAGTRRVLIIEDSVFCQNQERICYDFADES VV-----KRCLDPG-  
ILLAQFSHMKT--RLADIVDAETKGDGKDRAGRGDGKDGSESDRGDADSDN-----  
>u1\_Molco9629072  
-----MDRVQEARFARASLLRAPFRMALVGGSGSGKTYLLSLFRTL V-  
GAYRHIFLFTPVLNSA-----YDGYVWPDHIQK---VSSHE-----  
ELEYTLSVAKKKI-----  
ERYVAGSRGGER-----  
FLLILDDLGDGDA---

QLRSRTLLGLLNYGRHLNVS LAMLCQTYKHVPVNGRASITHLCCCNVSESDVENMMRSM-----  
SIKGSKKLLLQAMAVMRG-ALKARQVLIVEDSVFCDGEQRICYDAADERVL-----ARELDTS-  
ILLRQFSHMKS--QLPAIVAGAQ-----  
>u1\_Squvi549059730  
-----MDRVQEKRFCKRSLLRAPFRIAMVGGSGSGKTAYLLSLLGTLV-  
DGYRHVLLFTPVANPA----YDGYIWPDHIQK---VTTPE-----  
ELEYALAATKSKI-----  
ERFSAAPGRKGE-----  
RFLIILDDMGDM---  
QTRSRTLLGLMNYGRHINTSLILLCQTYKHVPVNGRASVTHFCCCNVSDSDVENMMRSM-----  
SIRGSKKQLMRAMGIIRS-ASAQRRVLIIEDSVFCEGEQRICYDSADEDVL-----ARRLDPS-  
VLIRQFSHMKR--QLGHILTS-----GKAARAADAEAEKKD-----

-----  
-----  
NCV0G0261, Poxvirus early transcription factor VETF, large subunit  
-----

>ASFV\_9628196  
-----

MDFQNDFL---  
TNPLRVTLYNPAENEYTKTFIFLGSVPANVLQACRKDLQRTPKDKEILQNFYGKDWEKKLSQYVVGSDSD  
DLDEFEKLFVEDSGEETNVMMPEIETMYSEYSIFPEDTFKDIREKIYVATGIPPYRQHIFFFQNNALQVT  
YRLLLSGSGVALDIRDYKKEFQQVGGLNIDASMESQKDELYVEALDSFQLIKNIHHIFVADLNTLVAPMR  
RQISIAMEDNYQFDLLYYGLIMKYWPLSPDAFK---LLVQSPLQMEKQYPALSPSLTSLKKR-  
LLEEQKLINFYARAQQVIKAYEGNRLTRGTLAVTSAMIKISPLVNIQINVRNVFDLFPATPDIPQLVVF  
FYSKTGPTVVS KHHITSTEPEKFSNKTFRVPTIILIRFINKKAFI--  
LTIQNNGHYFIESNWESENERHDFNSVSTLNNFINPIIHTINDMGPAAFPRGGSLPLPSNEDIQISISSM  
SVSTFWPYTLSSKGFTELKSRWREYEQAGIISVRGLQQTGIYNFLFKKGIYSYDPHEIERMIISSGPR  
KMDINVALLQNTYAYLFDANVAARWETIYGGRNIRIYHRVTDIKIEMFNITQEEFNYLWVYLFVFLDNLI  
TGPDKILVNKLSQLHDKQQGKGASQLRALQEQDPDYDLRKYDTQATVYSVLCQHPRPPVIYSEAEVKSM  
PPAKRKELVKYWNFTEGVPAYYSCPHDPYPLSLLEGRHPLNYCLPCCQKTKALLGTKRFYINNTCLTKH  
TFVEQDLEDLNTQTSRHTLSYGKKIPVNRI AFLPHQI ADELFLNTIKEPDI FCIVGVEQTMLGISNAGLF  
YSLARILD LAPKALAI EIAKAANTPQYYILGNGAGNMFSSGAELANLILQTFVEQKNQLLQWDTTWQDIF  
LDLVA--  
ICYDLHCVFFKDKQGDIEFEVSPSTIQKILSPSKIAIIFDTDEGIYPMAITQQKRFLKNSEAQYIFTED  
DPVMEVVQSMSEFMCKDNWWDIHDVKNI PGYTVGKKLINRHNFCYALLIDS DTD RPIYFP IRLSSYIHDD  
IPIDFDLRPTQIASFEETWKFITL FNKQYKQYEIVPSAVLQNIKKEFVGFLSEGKTGLYFYAPTQTLPA  
TLEKLP IATLTIDPRIDQAILYPLEEPYPQONKANKAFYINHLYKFLLEFFDVLYGLQSNSTRKH IEN  
LFQKTD FQKITSVTEFYTKLSDFVDLNDIHTIKHILETTDAEHALKVLQKNIFNFDYTLLSPLQSYTYDE  
LCQH LKLLTPRIEFYEDIETIDRGLINIYTS CQYSTLNQPQCKKKRLRIPVNHFENYIHILAADILNPL  
KHSTLLL TGLGVIDDLQFILRPQEIIS--VKNKF-  
>u2\_Me1sa9631309  
-----

-----  
-----  
MDYIETF INPQVIFLYN-----ENKKI IKTIF-----  
LSKDSMIEDSHVMTVYN--YLLSSHSDIFENKPQF-----  
INDHVI-----LTFTLEQARGYIKNILGLSDDIILFSIWN-----  
NFDYYLK---NGIFDPYNIQNMLLVEPNDDKSILYN-----

IYQNIVEGAVFCVTTNKNIGSQLARSNVYSSVYRDYISEIINNIYKNRY-----  
---AMKSSIID-AMEYSINIDFQ-----  
DLLR-----ISNIPDYNKT--LCISAYNNFYI-----KGNKITIL---DNFDS----  
MYESKYLKIYDKN--ININIYDDV-LYVKKLSD-----FTDILNK----  
YNIKSINIKSLPKTTIYVYFNTFL-----NPNLTIEFDFD-----  
FFINDTKKTKNIFIDLTKINIMTSQSHISYRSYNISTDLAKYF-----  
TLFILGYSHIFNKVQSKA-----  
KIKKIDEL-----  
YPSRY-----  
CQNYKD-----IKRQPILIDHIDES---  
RLIKISDNF-----YTGKEDSTKTYQRKGTKKVYDPLKHGDVYI--  
DSNGLKYQCSSIIY--YSNMGFL-----GNIYSATG--ICYP--  
CCYSKPKIRDITFNT-----  
CVHGTKFIHEEKINPIIVNY-----  
GRLILNPSNLS-----NLPYKLNLLLNSKNQIRIVKHTNRIILAKN-YTVIMAYQ-----  
PSTIIKDFNEM---YNFII-----  
NNAILFNDNMMYTHKDIIENN-NITPSIFILIQNRIHQFKNINKEQDNDNIT--  
VSIVDSNKINLIKKNFVNLNNITKEISENGIT-----  
VKNGKCYIDGELVKNKNITYF-----TKFSNITIRP--KSISEYILKYFKKYI-----  
DDNIYTDNYFLFNKIFVTNINLIMHENDAILNDFSVIQKLLDDMSSDYIVT--QSKTYN  
>u2\_Anocu578887673

-----  
-----  
MDYIPTTLQPQVIFLFD-----EYKHVKRTIF-----  
LSNRLIDNSNVMGVYN--YLNSRNTK-FLALPEY-----  
INDHII-----LSFGLQDARGYIKNILSIEEDIILFSIFN-----  
NFDYYPD--NTIFDPYNIPNTLLIQTNPDKVLYS-----  
IDINIVNGAVFCVTTNEYSKTNLARPSIYMPVFRNYIIDIINNIYKNNY-----  
---SLSAIIKD-SMEYSLNNTYK-----  
DLIK-----LSNLDNYKIT--YCISSSNKFYI-----KGTKITLI---EGLNM----  
EDYNHVLYIYDEKLNPIYIQLENDV-LAVTKISD-----FINILKE----  
NDIRNINIKSLNPKTIIYIYFNTYL-----NPNLTIQFDIK-----FFINQT-  
KTRNIFIDL SNKINIMTSKDHISFRSYSINSDLCKYL-----  
TLILGYSHIFNKIQHG-----  
RIKKVNEL-----  
YPVRY-----  
CQNYKE-----IKRQPILIIENVNKE---  
YLIKISDNF-----YIGKEDNTRTYQRKGTKRVPYKYGDVYI--  
DENGLIYQCASIY--YSNMGFL-----GNIYSASG--ICYP--  
CCYSKPKTNDPTFLT-----  
CVHGEKYMIEEKINPIIINY-----  
GRLILSTHGIS-----NLSPKLNLSILKNSSIEIVKHTNRIISANN-YTIITSYQ-----  
PSTSIKDFKEL---YNFILI-----  
NNAIINENTINTHKNILNTN-LDTIKVFILIQNRIHQKLNINKAIKSDIIN--  
MIDINDDKIRILLNYFNVISNIKTPISDNGIT-----  
IKNDICYIDDIPVNNKNIKYF-----TEFTNVSLKP--KSTSEYIKNYFNDYL-----  
NNMISSSDINLFTKIFVTKIMYNINEYDNIKTDFTSIKNKLDNISLNYNTI--INKLSG  
>u2\_Mytse506497839

MDNININYEYSTINPQVIFLFD-----  
ENKNVKRTIF-----LSKDSVIENSFVYGVYN--YLSLNNTK-  
FLTQPEY-----VNDHII-----  
LSFNIEQARGYIKNLLQIDENILLFSIWH-----NLDYYNN--  
NEIFDPYNIKNLLIESTDNKKILYM-----  
IYLDITDGGVFCVTTNEYTNTSLARDGMYKLYTEYIQEIISNIYKNNY-----  
---KLSSMVKE-SEEYSLTNNFD-----  
DIIK-----LSNINKYTKT--LCIGVYDKFYI-----KGDKITILDNTD-----  
YSEYVSLYIIDENN-TIKIVNDT-LFAEKLNY-----FTDILKE----  
EEIKNIIKSNSPKSIIYIYFDTFL-----DSNINIYDLK-----FFLNVT-  
NTRNIFIDMSYKINIMTSKNHISYRSFNIDTKLCKYL-----  
SLLILGYNHIFNRIQKHS-----  
RLKKIDEL-----  
YPSRY-----  
CQNYKD-----VKRQPVLIDSIDEN---  
YLIKISDKY-----YVGREDTTRTYQRKGTKKIFDPYKYGDVYI--  
DDNGLKYQCSSII--YSNIGFL-----NNIYLASGGNTCYP--  
CCYSKQKSRDEIFES-----  
CVFNKEIILEDKINPIIVNY-----  
GRIILSKNGLS-----KLSPKLNNILNSNSKIDIIKHTNRIDFADN-YTIIMAYQ-----  
PTITIRNFDDM----YSFIIN-----  
NNAIVVNDNIVYTDKKILKMN-NSDVNIFIIIQNRHQLKNINKQSKLDDIT--  
VEKIDDKKIKILKKYFNIINNITNPIVENGIS-----  
VTDDICKIDGEIIVNKNIKYF-----TEYNNISLKP--KSTSEYIEKYFKQYF-----  
DT-IYTNNIKLFIKIFITKIMHSIKESDVIKTDYSKLEEKLNITHKQISS-ILTKRYN  
>u2\_Amsmo9964419

-----  
MDITDNSYEYSTINPQVIFLFD-----  
ENKNVKTIF-----LSKDSIIDNSFAYGVYN--YLLSTNTK-  
FLSQPEY-----INDHVI-----  
LSFNLEQARGYIRNLRINENIILFSIWH-----NLDYYNN--  
NEIFDPYNIKNLLIESNDNKKILYM-----  
LDISITNGAIFCVTTNSYTNLAKEDIYSKIYTEYIQEIIIFNIYKNNY-----  
---KLSSVVKE-SEEYSLTNNFD-----  
DIIK-----LSNINKYKKT--LCIGVYDKYYI-----KGDKISIL---DNYN-----  
DSEYTSLYIIDQNNI-IKITNDV-LITEKLT-----FTDILKE----  
EEIKNIIKSTSPKSIIYIYFDTFL-----DSNINIYDLK-----FFLNVT-  
NTRNIFIDMSYKINIMTSKNHISFRSFNIDVNLCKYL-----  
SLLILGYNHIFNKIQKHA-----  
RLKKIDEL-----  
YPSRY-----  
CQNYKD-----VKRQPVLIDSIDEN---  
YLIKISDKY-----YVGKEDTTRTYQHKGTKKIFDPYKYGDVYI--  
DDNGLIYQCSSII--YSNMGFL-----NNIYLASGGKTCYP--  
CCYSKQKNRDEIFES-----  
CVYNKEIILEDKINPIIVNY-----  
GRIILSKNGLS-----KLSPKLNNILNANSKIDIVKHTNRIDFSDN-YTIIMSYQ-----  
PTITIRNFDDM----YYFIIN-----  
NNAIVVNDNIVYTDKSILKMN-NNNINVFIIIQNRHQLKNIDKQSKYDDIV--

VNKIDDKKIKIIKKYFNIISNIRNPISNNGIS-----  
ITDDVCTIDGELIENKNIKYF-----SEYNNISLKP--KSTSEYIEKYFKQYF-----  
DT-IYTNIRLFIKIFITKIMHSIKETDIIKTDYTKLEEKLNITNKQMSSVILSKKSI  
>SGPV105

-----  
MSDSESI---IHPQLVILTG-----PDKVIEKILY-----  
LSHFKSINKTSNVFLF---YQILKNKVPGIPEPEH-----  
VNNHVF-----LTLNNAQIRYYLMNLLKIDTPIIVYNNRY-----  
NIDYSYVD--RQVFNPNIT-KTGLQKND--SLLYK-----LYPDCYD--  
NLILWVVRSSDINDNDLGQ-----TGISWNM-EHEH-----  
SLFECVKKVIPDFTITSFVN-----  
NQFRTEITENKLRLITSKIQKYAES--LPTPRISVNF-----VTDKENIYITGNRLDC----  
QKEHLTIQVFE-DGILGIVIVESM-IYIKNKSL-----FQEIY-----  
FIMREYDYRRVTSEVVKVSLGSP-----NSSLPLGTDVN-----FLFEKT-  
STNNIILTPDKKTNIIIAKNLITIKMKNFYKSLEKYF-----  
TMMIVSYNHIHSPNFKSN-----  
PFLGLKPY-----  
YWSRI-----  
CQNTIG-----  
KNRKPLISSEISEQDQIDLIEQGTGF-----FKNKSS-----  
DFYV--DEYTNVYKCGPDNDAYRYLGF-----KIFASING--KCIP--  
CCFIQDQSSTPIYKK-----CIDKVD-  
TKKAGYDLYILQY-----GK-  
YILPDKIG-----FLKSRMDTLMNTKSKLVIEEETRRIKEAND-YSVIVTGKDSTG--  
NHHMINKDEEI---QKYITD-----  
NKVVLMYKSKLIYPENYHSLP-YTDYSYKVLIKSLLHNIREIKKSNDSDIEE--VYES-  
INKRKIIADNPNPKISDEPIIKSHGME-----LKFVKFYVDGVLFSHSISSDY-----  
PIKVVKINIEEKNTNV--KTAKKF---FRHFF-----SC-VETLQPEVFMTTFLTNIFQLFK----  
IPNSIEHISETKNILEKYFSSF--NI----  
>u1\_Nilcr115531792

-----  
MYK--VSPQLVILAG-----PDQRIERVLY-----  
LTLYDAIDETAPL--F---YFVKNFLK--AENVEV-----  
HRRHVL-----LTLKISQLKGYVRDLLGL-EEIIIYSHKN-----  
NLEYSYVD--NTIFNPFTLTQKKTLIKLD--SFLYN-----VYLDACD--  
FLVIWAARAADTAFaelGSY-----DEVdKNILKFE-----  
RLIGTFDQLNLFNSITSRFN-----NIFKTNIHATG----  
LKRFIANNVD-----RRMLLL-----RSDEYFIKLSGNNFVL-----  
NNERLNLsiWDDNDQLLIVSDGES-IVINDVEL-----FTE-isd----ED----  
VQLERIKSDITYKISLTSP-----TSKLKLDIETN-----FVFVET-  
ATNNILLSGDKKISIIILARNHISIKVKNNIPNIEKYF-----  
TFLIIFLNRVFNVSQVSK-----  
DFTKIETI-----  
YWSRI-----  
CQNTKT-----KNRKPVVVGSldGD----  
MDRVAENF-----YEGGGR-----EVFV--  
NDHDVMFSCIDPHQRYMHLGFL-----NIFYKLSG--LCIP--  
CCFLEAQKHSETFRA-----CVFKTL-



PLETCVSPYILNF-----GK-  
ILTPTKIS-----FLPILYNMYFNKENAICFEVDNKRLRSTEG-YYVVKALDDS-----  
VIHRLKTESNI----ISFVDA-----  
SCSVMIVNDLVYYPSPDVDKIN----NRIHILIQEIVHEVVLVRKQLRSDRIA--FLEP---  
AENKLLRFYPYITDEVTIFEGEGLR-----  
LTTKNFYVDGEPFTEPLSTKY-----TVYIVNVNPLN-TQVYKY----FSRFF-----  
KF-VVTNNLEIFIKTWVINILLRLG----AP----P-TVGRSTLEKYYKLN--Y-----  
>u1\_Orfvi41057146  
MVSVMRKPRPASVAMRMYGATSTLFFFMTFSVRSASSDRNCRLTSRDVRKSSRCRKKPSDSLRSSSLLRC  
GYMRLLRKKTVFSRAPARVASTLTSRPSMSASAAMSGTGWNMALPRDPRILFQFNAGYKYARATMLYT-  
--VAPQLVVLVG-----RHQEIERVLY-----  
LSLYDSVDEASPI--Y---FFAKQYIQ---KDPEH-----  
VRRHIL-----LTMRVRQLKGYLGSLLGLQDEIIVYSHKN-----  
NLEYSYVD--NTIFNPFSTQKKTLLRTD--GILYN-----AYADACN--  
FLVWVVARAADTSAPEFGSF-----EEPNSILKFEE-----  
RLIREFANLDLNMNVETKFN-----NIFRTNLRESG-----  
LRARIAQQSPDKRAEVDGDFDILLS-----KTDDFFVSMTGTRFML-----  
VDEPLNLSVWGPEGDLVISSDGKT-LTVNDVGL-----FTKLIES---MD---  
VKMDRVKGDITYKVSLLNTTI-----TSKMKLDMETS-----FIFVET-  
ATNNILLSTDKRISIIILAKSHVSVKVKNYIPNIEKYF-----  
TFLIVAISVMFNKQSS-----  
DFTKVETV-----  
YWSRI-----  
CQNTKT-----KNRKPVIVQSLDAD-----  
MAKVSNNF-----FKSETR-----EVFV--  
NGNGVMFSCMDPDGRYNSVGFL-----SIFHRLQR--ICIP--  
CCFLRSQAHTDTFKS-----CVYDEE-  
VDRSALNPYILNF-----GK-  
VVTESKLS-----FLPIIFDKYFNEGLEADFEADNKRLRATAG-YYVVHCCEG-----  
AIVRLRTVSEI---VSYVNA-----  
SGNVLISGDMVYFPMRLADTA-----ATRILIQEIVHDVVRIRKDAATDAIH-----  
LDQDASGRLASMFPHKAARRVREENGLS-----  
LTTSGFFVDGKRFPKLTSRF-----TAFVRNATVP--NAVSRH----FAKLF-----  
RH-VVTDAPDRFMKTWSVNCALKLG----VEPDS---ARAPALLQEFYPQP-----  
>u1\_Canvi40556182

-----  
MYV--VNPQLVILVD-----RDQKIVDVLY-----  
LTLYDGIIDRSSM--S---YFIRNHLQMSLDRVRV-----  
LNRHII-----LTLKISQLKGYLCNLLNIDEEIIIYSHKN-----  
NLEYSYVD--NTTFNPFMTQKKTLLKSE--SFLYN-----VYIDACN--  
FLVIWVVKASDTNVRELGSY-----EEVDTNVLKFES-----  
KLIEMFNDLDLNFVTKFN-----NIFRTNLKMTG-----  
LRNLVLNND--KMLFI-----KSDEYFINLSGNHFVL-----  
NDEPINLSIWDGSLAISSDGNT-ITVNNVKL-----FTDMIPN---NN---  
VQMERIKSDITYKVSLLATPI-----TSKVKLDIETS-----FIFIET-  
ATNNILLSVDKISIIILAKNHISIKVKNYIPNIEKYF-----  
TFMVIFINRLFNTVKQSM-----  
DFTKIETI-----  
YWSRI-----

CQNTKD-----KNRKPVIVSSLES-----  
MVKISDNF-----YKSPTK-----EVFV--  
NNNDIMFTCDDKTGKYNNVGFL-----AIFYKLQK--ICIP--  
CCFLKSQSHTDTFMA-----CVHNKE--  
TDKSIISPYILNY-----GK--  
VVTDSKIS-----FLPPIFNEFFNSDMKIDLES DNKRLRGTKG--  
YHVIRSLHNCRHYTLRRIRSKNDI-----IEFVNS-----  
ENVTLIANDIVYFPMKYSSIG----NKIFILVQEIVHEIVVVKKEEDKVDIY--LEEL----  
KVNKLDIFPYKIKTVDIKEENGLK-----  
LTTDGFCDVGEFTEPLSTKC-----SVFMDNISINN-NPIAKY----FNQIF-----  
KY-VVTDNKEMFIKTWVINTMLKMG----ISKDWS-SQVKTILEKYYKL-----  
>u1\_Molco9629042

-----  
MYT---VNPQLVVLVD-----RQQQLREVR-----  
LSLYGTLDEASPL--Y---YFAKQHLR--AETLAV-----  
ERRHIL-----LTLKISQLKGYLCHLLGLREDIIIYSHKN-----  
NLEYSYVD--NTIFNPFTMTQKKTLIKAD--SFLYN-----VYVDACD--  
FLVWVARAQDTPVPEFGSF-----EEVDANILKFEA-----  
RLVEMPELDLEFSIQSKFN-----NVFRTNLRSTG-----  
LRNIVKRNQD-----NRILFI-----KTDEFFITMSGNHFVL-----  
NNEALNLSIWDAQGR LAISSDGD--ITVNDVRL-----FTELVD----SN---  
LQMERIKGDITYRIFLLSPI-----TSKIKLDIETS-----FIFVET--  
ATNNILLSADKKISIILAKNHISIKVKNHIPNIEKYF-----  
TFLVIFINRMFNAVQAV-----  
DFTKIETI-----  
YWSRI-----  
CQNRD-----KNRKPVIVSSLDAN-----  
MERVSDNF-----FRSPTR-----EVFV--  
NSNNIMFSCVDPLGKYNSVGFL-----AIFYKLQK--MCIP--  
CCFLRSQAHTDTFIS-----CVHRE--  
LDRQLVSPYVLNF-----GK--  
IVTEAKIS-----FLPILFDQFFNEGLRIEF EADHKRLKATDG--YHVVKCCTRS-----  
EITRLRTQRDI----IQFVNA-----  
EQNTLIAGDMVYFPMHGARSAGAEHQRVYILIQEIVHEVVMVQKAHDSRIR--FREL----  
ERNRLWEFFPYRVPSARIKEEHGLV-----  
LTTDGFYVDGKLFSEPLSTRY-----VAFTENVGTA--GVAKY----FAPVF-----  
KY-VVTEARELFIKTWLLNVMMLG----LTGESSA-AQTREALERYRLS-----  
>u1\_Squv i549059704

-----  
MLYV---VNPQLVLFVG-----RGQEIQRALY-----  
LTPYGELDENSPL--F---YFMSRHIN--VTQPEV-----  
LRRHIL-----VTLRMHQLKGYLCHLLGLDDDDIIIYSHKN-----  
NLEYSYVD--NTIFNPFAHTQKKTLIKTD--GFLYN-----TYVDACD--  
FLVIWVARARDTVVPEFGSF-----EEVDPNILKFEA-----  
RLLEEFPHLDLNM TIETKFN-----NIFRTNLRRTG-----  
LREIVKRTQE--LEAG-HGVLLS-----RTDEFFIIMTGNRFVI-----  
NDEGMNLSVWDADGSLALSSDGV T-ITVNNVNL-----FTRLVSD----LD---  
PQMERIKGDITYKV LLETPI-----TSKIKLDIETS-----FIFVET--

ATNNILLSADKRISIILAKHHISVKVKNYIPNIEKYF-----  
TFLVIAINRMFNSVQKSS-----  
DFTKVETV-----  
YWSRI-----  
CQNTKQ-----KHRKPVIVSSTEEG----  
MVRVSENF-----YRSDER-----EVFV--  
NKNQVMFSCVDPNGKYMHLGFL-----SIFHRLQG--ICIP--  
CCFLRDQSHNETFAS-----CVHNRD-  
VDRSAINPYVLNF-----GK-  
VVTESKIS-----FLPIIFDTFLNEGMQADFETDNKRLRSTTG-YHVVRCCAGE----  
GITRLRTTADI----IRYVNE-----  
DKNILIVGDMVYYPMNAEMG----DRVRILIQEIVHEVIVVRKKANRDAIE--FQPL---  
SGGQLRSYFPYHARGEPIKSDSGLT-----  
LTTDNFLIDGVPFTQDLSTRF-----VTFTRNASTS--GAIKY----FAPLF-----  
KY-VVVESRERFVKTWVINTMMILG----LSADSDP-REVRAKLERYYPNS--GRP----  
>u1\_Vacvi66275923

-----  
-----  
MRYI---VSPQLVLQVG-----KGQEVERALY-----  
LTPYDYIDEKSPI--Y---YFLRSHLN--IQQPEI-----  
VKRHIL-----LTLRMTQLKGYLGNLLDIKDDIIIYSHKN-----  
NLEYSYVD--NTIFNPFVYTQKKTLLKND--SFLYN-----VYPGACD--  
FLVIWVARACDTSIPEFGSY-----EDVDNIIKFET-----  
MLMEVFPQLDLIDITVESKFN-----NIFRTNLKLTG----  
LKKIIQRVQD--LDIN-YKSLLS-----RYDEHFINMTGNHFIL-----  
NDEQLNLSIWDLDGTLALSSDGD-VMINNVKL-----FTDLVSD----ID---  
TQMERIKGDITYKVHLATPI-----NSRIKLDIETS-----FIFIET-  
ATNNILLSDDKKISIILAKNHISIKVKNHIPNIEKYF-----  
TFLVIAINAMFNSVQKSA-----  
DFTKVETV-----  
YWSRI-----  
CQNTKN-----KNRKPIIINYLDPG----  
MKKISNNF-----YKSDEK-----EVFI--  
NDNGIMFTCMDPLGKYNKVGFL-----NIFHDMRK--YCIP--  
CCFLHDQSHRSTFSS-----CVHQID-  
VEKKIVSPYILNF-----GK-  
VVTESKMS-----FLPIIFDAFLNDGMTANMEQDNKRLKETS-G-YHIVRCCAGD----  
DIVRLRTTSDI----IQFVNE-----  
DKNILIVNDMVYFPMNASDIG----KKIHILIQEIVHEVMIVKKESSDKID--FFPP---  
NYKLLKDLFPKQTIQTPIQSDAGMV-----  
LTTDGFYIDGKLFNEDLSSKY-----VTFTKNVIAS--DAVAKY----FSPLF-----  
KY-VISEAKDRFIKTWMINIMIHMN-----VDP-NNIIPTLEKYYPNS--GRAQIN  
>u1\_Yabdi12085081

-----  
-----  
MKYI---ISPQLVIYVG-----KGQEIKRALY-----  
LTPYGVLDKSSSI--Y---YFLKTHLN--IHNPEI-----  
HKRHIL-----LTLKIHQVKGYLLNLLNINDDIIIYSHKN-----  
NLEFSYVD--NTIFNPFNTQKTLIRSD--GFLYN-----IYPGACD--  
FLVIWVANSKDTSMIEFGSY-----EEVDNNILKFEN-----

HLLEVFSSLDLEMTIESKFN-----NIFRTNLKTTG----  
LKTIKKINK--LDTS-YKSILY-----KSDEYFINITGNHFIL----  
TDEKLNLSVWSDNCLAFSSDGD-IVINNVKL-----FTELVSD----VS----  
TQMERIKGDVYKVFSTPI-----TSRIKLDIETS-----FIFVET-  
ATNNILLSADKKISIILAKNHISIKVKNYIPNIEKYF-----  
TFLVVAINSMFNSVQKSS-----  
DFTKVETV-----  
YWSRI-----  
CQNTNN-----KNRKPVIVSSLDED----  
MKKISNSF-----YKSEKL-----EVFI--  
NTNGVMFSCIDPMGKYNSIGFL-----SIFYKLQK--MCIP--  
CCFLKDQSHDTFSS-----CVHNKD-  
VSNDIISPYILNF-----GK-  
VVTTSKIS-----FLPIIFDTFLNEGLKISFEQDNKRLKETT- YHVVKSCNG-----  
EIIRLRTTSDI----IDFVNK-----  
ESTILIAEDIIYFPMNYISIG----NKVYILIQEIVHEVVLVKKNKDVKIL--TYP-----  
NINILKELFPKQTTSLTIRSDSGME-----  
LTTDGFLIDGVKFDKELSSKF-----VTFTKNVTT--DFISKY----FSPLF-----  
KY-AITESKERFIKTWIINIMLNF-----TDIES-SVIIPKLEKYYPNH--GKKITN  
>u1\_Myxvi9633732

-----  
-----  
MRYV--VNPQLVLYVE-----KGQKIKRALY-----  
LTPYGLDDKSPI--Y--YFLSTHLK--ITDPEV-----  
HKRHIL-----LTLKISQLKGYLCDLLRIRNDVVIYSHKN-----  
NLEYSYVD--NTIFNPFAHTQKKTLIKSD--GFLYN-----IYPDACD--  
FLVIWVADAEDTSIAEFGSY-----EDVDVNILKFET-----  
RLLEVFDDLDMTIESKFN-----NIFRTNLKFTG----  
LRKLIKKINE--FNGSRYKSLLY-----KSDEYFINLTGNKFIL----  
TDERLNLTVWSDGVVTFSSDGD-IMINNVKL-----FTSLLTD----ID----  
LQMERIKGDVYKIFLSTPI-----TSRIKLNIEETS-----FIFVET-  
ATNNILLSADKRISIILAKNHISIKVKNYIPNIEKYF-----  
TFLVIAINSMFNIIQAS-----  
DFTKVETV-----  
YWSRI-----  
CQNTKN-----KHRKPVIVSSLDED----  
MEKVSDNF-----YKSSTK-----EVFI--  
NSSGIMFSCLDPLNKYNYVGFL-----SIFYRLQK--MCIP--  
CCFLKNQSHTEFSS-----CVYQKE-  
IASDVINPYILNF-----GK-  
VVTTSKIS-----FLPIIFDSFFNEGKIIIFEQDNKRLKETIG- YHVIKSCDE-----  
DIKRLRTISDI----IAFVNE-----  
DKNILIAEDIIYFPMNYVDIG----TRVYILIQEIVHEIVVVKHMSKDAIE--VFPP----  
NYKLVKNLFPKQTKFITIRSDSGME-----  
LTTDGFLVDGKEFNVDLSSNY-----VAFTKNITTP--YTLSKY----FSPLF-----  
KY-AITESKNRFMKTWLNITMLRLG----IDLDD--TNILPKLEKYYPNH--GKSV--

-----  
-----  
NCVOG0262, Poxvirus Late Transcription Factor VLTf3 like

-----  
-----  
>ASV\_9628188  
MDEIINKYQAVEKL FKEIQGLAAYDQYKTLISEMMHYNNHIKQEYFNFLMIISPYLIRAHSGETLRNKV  
NNEIKRLILVENINTKISKTLVSVNLLQKKLSTDGVKTKNMWCTNNPMLQVKTAHNLFKQLCDTQSKTQ  
WVQTLKYKECKYCHTDMVFNTTQFGLQCPNCGC-  
IQELMGTIFDETHFYNHGQKAKSGIFNPNRHYRFWIEHILGRNPEQELGKQDPCGKVLQQLKKIIR  
DNKCIALLTVENIRKMLKEINRTD---LNNCVSLILRKLTVGPP-QISESI-  
LLRGEYIFTEAIKIREKVCKGRINRNYPPYIYKIFDAILPPNDTTNRRILQYIHLQGNDTLANNDSE-  
--WESICME-----LPEIKWKPTDRTHCVHFF-----  
>u2\_Mytse506497949  
-----

-----  
-----  
---MTELIKCKYCNSFNVIKHKDIYS-CCDCSN-CYTTSSKRITTISSP-----  
SNNKTIHCNNVLKEISNIS-----  
ITFEIVEKFRKIVESNNLNKNSITTALGSEYLKSGIKN---YRTHKLINILICNGKPL-LLSKEN-  
IFDINIIFEDFIQFIYKNNYNRTIS---YEFCLDKIFAIL-----  
KINYVINFNYNKLNKRDDKPEI-WNKYKIE-----  
LYNKTRNIPNNKFIFCPCNIIKNEYIQKPLLRNIG  
>u2\_Amsmo9964519  
-----

-----  
-----  
---MSDNIKCKYCNSFNIIKNKDIYS-CCDCSN-CYTTSSKRITTISSA-----  
SNNKTIHCNNVLKEISNTS-----  
ISYDIVDGLKLINDNNLNTKSITTALGSEYLKSGIKN---YRTHKLINMSLSDGNNC-ILTKDD-  
IFRINIIFEDFTQFIYKNNYTKTIS---YEFCLDRIFDIL-----  
NINYVINFNYSKLNKRDDKPEI-WNKYIIE-----  
LYNKSLIKSNNKFIFRPNNIIFNEYIKNNICLRNII  
>u2\_Anocu578887678  
-----

-----  
-----  
-----MDKCKYCNSFYINKNNDLYF-CDDCSS-YYTTTSKRISIKSKP-----  
YNNKKIHFSNVIREISHNN-----  
ISDINHDFEKMLEDNNDKKSITSTLVYEFKTRGIKN---YRQTYSLMNM--SKGDNI-ILNDD-  
ISKIYIMFDDFIKYLYKCKQIRTID---YGFYLNKIFDIL-----  
KLTNNLKPNTKSNKRNNKSEL-WNNYIIN-----LCNRSIDIEIS-  
FIFIPNNPIINDYYIKPYSFRSIG  
>u2\_MeIsa9631310  
-----

-----  
-----  
---MDIENCKYCGSFDIEKVVDIYT-CGDCTQ-TYTTSSKRLSTKSKP-----  
FNNKMHFSNVMRQMSYNI-----  
IIDKNYEEFEELLAKNNLERRSLTTTIVYEFKDKGIKN---YRQTFALMNK--SSDSMV-  
SLNADDITNISILFEDFIKFLYKNGYKRTIS---YGFIIIDRMLEVL-----  
NITSNLKPNYTKSNKRDDKSEL-WNNYVID-----LCNRPKTKTIP-  
FIFIPNNKIENEYFL-----  
>SGPV100  
-----

-----  
-----  
MENSFMLDGKLLDHEKETSTFVPPHLLRVIEDRKLKMSKLLDYKYCDECNINSVLNCDGKLF-

CISCEKYTFVDGKETKTNSSCY-----VGNKFIHFKNVIKRLLTRS-----  
DNSDLVEELKVELKEMDIDIKDVDSNFISKRLKNKKIYTSKDYKKVFEILSD--LNNHHIEDMSEEM-  
FEQITSIFHSLVLFVQTIRSGKSIN---YNFFLNKIFMSV-----  
NAISYLHPQMVKNPYRNNENQLIWDMFIKYNNEEQLKKKEDRTIIIIP---ERSEITFNDF-  
ECSLNV--  
>u1\_Nilcr115531786

-----  
---MNSLKCCNSCKHNGLVTEYDYEF-CVFCES-IFTIHVKTVKKSSFH-----  
VSNKLIHLRNVLRRLLSRQ-----  
CSSHIIDEIMTDIERYNISSQVDANFVSNFLKEKDKINKKDYKLVFEIINH--VRNDTL-NLTTEK-  
INEIVEIFKLLVFFQENTESKTIN---YSFFLDKIFNVI-----  
GVTANLKPQTVKKNYAKNNYNQLTWEKFLRF-----LDGKCLANNVVDY---  
GHEYVFGTYDHSPCSLEV--  
>u1\_Canvi40556176

-----  
---MRNLKSCSNCKHNGLITEYNHEF-CIFCQS-VFQLSNKVSKKSNFH-----  
VSNKLIHLRNVLRRLLSNQ-----  
CSSDVITELRTVMNKNNISSKDIDANFVSSFLKANDKINKKDYKLVFEIINH--IKEEKL-NLDTNK-  
INEVIEIFKHLVFFCQENTSSKTIN---YSFFLDKIFNLT-----  
SVTSNLKPQTVKKNYTKNNSNQLVWENFLEY-----MKNKKINTLVHDY---  
GHEYVFDYGFTTCSLEV--  
>u1\_Molco9629036

-----  
MPGMNALRHCHGCKHNGLVLEQGYEF-CIFCQA-VFQHCACVAKRSNFH-----  
VSNKLIHLRNVLRRLLSKQ-----  
CSGDIIAELRALMARNQLAPADIDANFVSSFLKAHEKINKKDYKLVFEIINQ--IKDERL-ELDTQK-  
INEVIEIFKHLVFFCQENTPSKTIN---YSFFLDKIFTLT-----  
SVTRNLRPQTVKKNYTKNNSNQLIWENFLVY-----MRGKKLNTCVHDY---  
GHEYVFDHGFACSLLEL--  
>u1\_Orfvi41057140

-----  
----MNLRMCGGCRNGLVSDADYEF-CLFCET-VFPMGIRVQKRSNFH-----  
VSNKLIHLRNVLRRLLSKQ-----  
CSEEVIRDLRAMMDRHQIRPEDVDANYVSSFLKDSSEMINKKDYKLVFEIINQ--VKNEKL-DLSTEK-  
INEVIEIFKQLVFFCQEITPTKTIN---YSFFLDKIFEVT-----  
GVTRNLRPQTVKKNYAKNNSNQLTWENFLAH-----MRARKRAAQIPEF---  
GHEYVFSRFAACSLDL--  
>u1\_Squvi549059698

-----  
--MTMNLRLCNGCRHNGVVSDNYEF-CVFCDA-VFQRCTRVSKKSNFH-----  
VSNKLIHLRNVLRRLLSRQ-----  
CSGEIEELRSLMDRNQLSTDDVDANFVSSFLKANERINKKDYKLVFEIINQ--VKNEKF-DLSTEK-  
INEVIEIFKHLVFFCQENTPSKTIN---YSFFLDKIFAIT-----  
NVTRNLRPQTVKKNYAKNNSNQLVWENFLAH-----MRSRKRTALVTDY---  
GHEYVFRDERFTACSLEL--

>u1\_Yabdi12085075

-----  
-----  
----MNLKLCSGCSHNGIVSENGYEF-CIFCDA-VFQKCSKISKRSNFH-----  
VSNKLIHLRNVLRRLLSNQ-----  
CSGEIISEILLMKKNQISTDDVDANFVSSFLKAHEKINKKDYKLVFEIINH--VKDEKL-NLTTEK-  
INEVVEIFKHLVFFCQENTPSKTIN---YSFFLDKIFDIT-----  
FVTKNLKPQTVKNYTKNNSNQLIWENFLDH-----MKNKKRASVIVDF----  
GHDYVFNNERFVSCSLEV--  
>u1\_Myxvi9633726

-----  
-----  
----MNLKLCSGCSHNGIVSENGYEF-CVFCES-IFQKSSKIQKKSINFH-----  
VSNKLIHLRNVLRRLLSSQ-----  
CSGEIISELLELMQRNQISTNDVDANFVSSFLKAHERINKKDYKLVFEIINQ--VKREKL-NLTTEK-  
INEVVEIFKHLVFFCQENTPSKTIN---YSFFLDKIFDIT-----  
LVTKNLKPQTVKNYTKNNSNQLIWENFLSY-----MKTKKKASAMIDF----  
GHEYVFITEDFTTCSLEV--  
>u1\_Vacvi66275917

-----  
-----  
----MNLRLCSGCRHNGIVSENGYEF-CIFCES-VFQKCTKVQKKSINFH-----  
VSNKLIHLRNVLRRLLSHQ-----  
CSGEIISELLDIMEKNQISTDDVDANFVSSFLKANERINKKDYKLVFEIINQ--VKDEKL-NLSTEK-  
INEVVEIFKHLVFFCQENTPSKTIN---YSFFLDKIFDIT-----  
SVTKNLKPQTVKNYTKNNSNQLVWENFLAH-----MRSKKRVTMVEDY----  
GHEYVFDERFSTCSLEV--

-----  
-----  
NCVOG0267, RNA-helicase DExH-NPH-II

-----  
-----  
>ASFV\_9628180  
MGKPTLLEPGHLYNVAEHNKNDVPIHYIITWIKQ-RLPEFGGAIPTSLADRVLIIK-  
SRTGSGKSTALPVHVFRI LRNENTHSFQKYLGRSVICTQPRVLTAVTLAKDIGASTHYPDMIL-----  
GQTVGYHTKPLTE---  
KPNRGLIYATAGVLLAQLHTMTDDEIASRYAFMIIDEAHERALGIDLMLMYIKSMLQRMLQRGSIGA---  
----L-  
RIPFVILTSATIDTHKYSTYFGIGKENIILVEGRQYGVETHWPLYNTNNYIKTACETALTIHKENIHDRP  
TEADILIFMPGMAEIRFLSMLLNANMDLAKEKLPMLLILPIDSEAIAQENEAYLGLKAEIKNLWVKNPL  
TAKVEKPLRRVIVSTVVAETGLTIETLKYVIDPGWNRSIETYYPEWAGGLITRPAAQSRIEQRKGRVGRV  
FPGHFYPLYTKHVFEQIPAQQYPEIITEGPGAIFLSIVVETIKKKEGVFKAEEIDMLDPPPTDALASAI  
ERAIVAGLLTRGEKGLQLTQLGDIASRFSFLSIEEARMCFSGYFWQAAISDIATILAVVVA-  
DKKLTNLLDSKQRNGAMLAEAVLAGIPPFLQNIDNAYTNIHLLADDLLEGLFIFEGFQHAIVYFINKV  
NNVAKHLREWCEKMLKYSSMVQILARREDILNELAIVGLNPFHQWQNRLASANAETFLKRVCTLKQCMY  
EAYRLNCFQYDKHRLLYTGRNGIHFSYHDAVIKNPSCIVTPRIMLSPVSKQYMEWRLEPSFVSVLDGFVN  
VDINFLSPRQEIPNILGGVEDEEEEPPLPIQVFLHKYVKTHFHFSGKSFKELKMKPSQMIKFPETTLINM  
IPDIPKNVVQTYLEINVCHQYSFKRLIYCETF-  
YTDMDDVQHENSVELIGLPMAAHLTINDFNKLYHLLKPDGFLIVYDLHKGQEAFWLHSLQDALGHHTIR

RDMDFHTEPEWETIFKECGF---TPIFSKQPSEHELFIIVFKK--  
>u2\_Me1sa9631497  
MDMQNITD---LYKIDKKTTLYPNIINKYNYMAYLLFPNNATIFNSYITKKEVFEY-PMQ-----  
FAIALYPV-----YKLYWHNINICLNRFIYLSNEFKNNISINTVYNLLY---  
NNELKFEDDNIIN---GKNLKISYSAYSVVTIISQITINISSLNKYQIYGIIESANY-LGILS-----  
SY--KQNKYFD--KN-----  
LFSFTKSELRSTMIDVQLKIFEIFISKKNCIISGGTGIGKTTVIP-----  
KLFWWFNLLFDGYEFWNTSNENKNINDFIF-----KPNF--  
EKNKTILSLP-----  
RKALIRQMGINYIKSLG-----FDNISGSPILKYKDVKKEKEYNNNPILYP-  
F--VLSVNRITINNIKHSNSVIID-----  
EIHEHDKFGDIAIAIARTKKNKYNIRNIVLISATIESDIDNIRIYFK-NIVEIYIPG----  
VSLFPVKEI-----ECEDKD---  
VISILKNYMP-----  
VGKSVIIFYETIKKINEYKEILESILIDKIYKIYTIHSKITNINAIINKLQN-DKK-----  
HIHIIILSTNYLESSITITNATL-----  
VIDNGKMYQKFLTGSTMYITESMYIQRKGRVGRISKGTYIRTYSKDLLQTTFKHI-----  
-----NYQ-----  
YLWEYILVFKYNNMDYYNDLFIKPDPSRIENTLNYLKNINIDIDKYISLLY-  
SKFNKYEINMVEYLSIYINNSTSDIILLNEFIDNIRNSDKYIFP-YRLTEIFHKLNVRCRCINIT-ET-  
EEGN-INCSFVILNNYDGDGDP----FFKLSFEKSNLICRYNKIYYIVSMSP-----LYLID---  
>u2\_Anocu578887656  
--MNNLSN---IYDT-NIYNLYPELIDKYNITHLLYPNNTIIFQTEIERTYVVKY-PDN-----  
FIILVFPV-----FKLYWSNVFLCLNKNKIYLDKDN---  
TKLLTLYEMNTILTNSKLIFNNDIIIE---  
PYNLYLTYSAYASTVLNNNKFKLATLNIHQLYGIVDDANK-LGILS-----  
NSSVKSINS-----  
NYLFTFEKSDLRSTQIDVQLKVFDIFIKRDNCIVSGGTGIGKTTIIP-----  
KLFWWFNFLFDGFSEFESNLSSKSIKEFIF-----DTDI--  
IKKKTVLSLP-----  
RKALIRSMGMTYINSLG-----  
YKDIGAPINLRYKDVKLEKQYNNSTNNFISQF--  
TLSVNRITLNIKNTNTILID-----  
EMHEHDKFGDITIAVCNKKKFKIRNIILISATIEFEIDNVKRFFK-KINQIYIPG----  
KSLYPVNEL-----EIINVD---  
ILNIIRSNNLPN-----  
LGYTIIIFFETISKINEQYKYILNLLNNSKCKLYKIHSKIENINEIINKIEK-NKH-----  
YIHIILSTNYLESSITISNAKV-----  
VIDNGLMYLKEFLTGKITYITESMSRQRKGRVGRMSPGTYIRLYQYKKLNNNLKFI-----  
-----NHQ-----  
YLWDYIIIFKYGLDLKDYFVIPDDLTRVDNTINYLLKKQIDINNNIYYIF-  
RLYNKIELRMIEYLSVYLNNDNNKIYLLLENFIKNIESKI---IS-YELTLLKSLNVQCKLVRKR-KY-  
NDIY--VCKFILLDAYDGIP----YFNMYNINDDIPNIDETYYIICEDP-----FKIIR---  
>u2\_Mytse506497822  
--MQDIKN---MYDF-KKYTLFPDLHGKYNYSNLLFPNNVNIFQSYIDFEYVKKY-PYN-----  
FLIVLYPV-----YKLYWKNTYICYNQNTNTIYLGN--  
QEKYITSIELINDYLLNGIEYKNDELYII---  
SNGVKITYSAYASTILYKSSIRLGLNIDQILGIVESANK-LGILS-----  
NNIRTKFNETENI-----  
LFRYTESNLKSIQVDVQLKIFDLFITRSDSIVSGGTGIGKTSIIP-----



KIIWFFNFDGYSIFNNKINNLIQIYDFIF-----DINI--  
IEKNTLLSLP-----  
RKAIINSTATNYIKSLG-----  
YENILNSPIIIKYKDIKLSKEYYNSKPRFSTNL--  
LISVNRLTVNNLKSSSTVIID-----  
EIHEHRYADISIAISYKLLKKFNIRNIILISATIEYEIDNITRFFKNKITQVYIPG----  
FTLYPITEI-----ENTTDE---  
ISDILLKYTPN-----  
VGYSVIFCESVNKIKSTIEQLKLNINDPLYKFYEIHGKILDVNKIIYYIET-NKK-----  
YIHVIVSTNYLESSITISNAKL-----  
VIDNGKEYRKEFIDGKVSYITVSMYKQRKGRVGRVSKGTYVRTYTLDKLNNSFKHI-----  
-----NYQ-----  
YLWDYIIIFKYYGLDVKNDFVIPDDLNRVNNTIYYMKSIGIDIDKDIYKIY-  
RIFNKYEINMLEYFIIYLYGSNEEIFLLSTYDKNAIE-----IP-YKLYNIYIKMNVKLLTRFK-KF--  
NTF-FCIFTFINKVYDGPQNF--FNTIDNDIVQDSKKF---FYLKSEN-----LVIMSE--  
>u2\_Amsmo9964395  
--MQEIKN---IYDF-KTYNLFPELHNKYNYSHELLFPNNTNIFQSYIDFDYVKKY-KYN-----  
FLILLYPV-----YKLYWKNMYICYNQNSNKIYLDN--  
KEIYNTSIELINDFLIDGIDINNNIITIR---  
SNGSTITYSAYAYATILYDLPYRLGNLDINQIFGIVESSNI-LGILS-----  
TNEEQKKKFPKYINNIELEKNILFKFKESNLSIQIDVQLKIFDLFINRLNCVVSOGGTGIGKTSIIP---  
-----KIIWWYNLLFDGYNMFNSRISNVSIDNFIF-----DINI--  
IEKNTLLSLP-----  
RKTIIINSTAINYIKSLG-----  
YSEITETPIIIKYKDIKLYKEYYNNKIIIFPTNL--  
LLCVNRLSINNLKNSSVIIID-----  
EIHEHRYADICIAVSYFLKKVINIRNIILISATIEFEIDNILRFFNKNKIVQVYIPG----  
FTLFPVTEI-----ENTVDS---  
IDKILLDNKPP-----  
VGYSVIFYESIPKLTFIKKLEESIKDPIYKFYSIHGKTDNANEVIRYIEN-NKK-----  
HIHVIISTNYLESSITISNAKL-----  
VIDNGKVYRKEFIDGNITYITNSMYKQRKGRVGRVSKGTYIRTYTLDKLNNTFKNI-----  
-----NYQ-----  
YLWDYIIIFKYYGLDIKKDYFVIPDNINRVDKTVNYMKSIGIDIDKCINKIY-  
RIFNKYEINMLEYFIIYLYGSETEKLLLSTDDKNIID-----IP-YKIYNIYVKNMVKIKLESKR-  
SI-----IYIFKFINDVYDGPQKFK-YINTDENYFDKNI---YYLKSEN-----LIIMRD--  
>SGPV150  
-MSCSEVE---WS-----MFPNQITIFQTDVTWEVFKSL-WKPEHKI---  
LLISVWRL-----FWSGVKGYSVKKKTACVSLSDDA-----LTSVPNMLW-----  
SQTKRHWVD---KDGIIFFPEVASALYFKNEVNWED--VGMEHWFGVVRAASD-LGILT-----  
SPKSKKTSLVKILGS-----  
TTGIPKVPLKGLTEPIQKLIFESWKTCKFMVLTGGTGVGKTSQIP-----  
KILFWFNLYFGPRDNICIP-----RW-----  
SPALLRQSRPLCLALP-----  
RVELVKQVSSTLLKGLG-----LSIFEGSPIIPKFGGVQDDPVYNNNTTKCNYG-  
I--EICTHRIAIAKNIRRYESMIVD-----  
EIHEHDQYADILIAVLKYSKN---SLQTLMSATIDDRERLNEFL--NPQFVHIEG----  
KSLHKVEEIHRTTGD-LESKNKYFKNEEKN---  
IMETIKMFPPA-----QGHCGILFMARVAQCENMYKELLEPMF--  
PGIEFIVVHGRVPDVNGLINKISNVGPH-----HKPQILISTPYLESSITIPNATV-----

VYDTGRYWRTLLSGGSESPVNGMADQRKGRVGRVIPGMYVKLYN--KYEH-  
WKKI-----DGE-----FLYPYILLTYPYKLEV-  
DDLVIKLTQGRWELTKNYLESL-FPIDR-----  
ITLNIYDKFQCNMIEFIKIYRDLNDEKLEFGNWDTKPDILT---IS-  
PKFKKLLKLNLRVSVISCTWNPTLEMN-RITMRLKFGPEKNI-----NETIYSQTELKTEQT---  
LHKIHNSI-----FV-----  
>u1\_Canvi40556047  
MATNELFS---IY-----AFPNNYDIFPHSYTYKELEEY-HNKDTLF---  
FSHSVFP-----IKHRWNKVFICLKDDTYMLNIET-  
TNSISAKIPVSKLIDVIPVSINYSKQVYI---GNDRFITFECYSYVKCIGYNHVSD--  
ITLDDKRGLLVAGNH-LSIFS----SNKKVPVKNSIGILNN-----  
PNPFAIISFKSLSTTQVHIFDMLKRRKQIVVTGSTGIGKTSQLP-----  
KVIMWYNLFGGWDDID-----KI-----RLDF--  
IPKPIVLSLP-----  
RVTLVKSNNGNFLQSLG-----FSQFEGSPVELKYGGHTE-----KTKKGFQG-  
I--VLSTNKLTSYLSKYNIVIID-----  
EIHEHDRIADIMIAVLRKNIDS--IHSLVLMSATLEDDKDRLEFLP-DVEFYHIEG-----  
PVLYSIKEIYVKNRYS--PDKRVYFDNERKN---  
ISSTLLWCKPD-----NGMCGILFLPSVSECIKYKEYLESKN--  
KNIDFIVIHGKLNIAEILQDVQRPNRE-----RPCILVSTPYLESSITIRTATH-----  
VYDTGRVYVPRPFGGEMFISKSMMTQRKGRVGRVMKGTYYVYFDMNLLKA-  
IKNI-----DHD-----  
FLYEYIIYAKQFNLSLPEDLLIVPSNKKMLKASEEYIKSFNIPFDK-----LF-  
EIVNHFVNMVEYVKIYNKGGKKEE-KLDMFERDDI-----LT-EETLEDIKNLQLLVKIKTTS-KR-  
KDLY-VYTGEILFGPYTKT-----IIRLTSKRFYK--NY---IYMLSDRS-----FTLYR---  
>u1\_Nilcr115531735  
-----MLD---LF-----AFPNNVDVFPHEYSQERLEEL-NAADPSA---  
FSLAVFPV-----HKHRWADAYVVRARGVYRLSAEV-----RTALPEADA---  
APLEDFVPVRTYADHHEAGGVKVSLECYSMQLCRRGLRLAD--LGLAVKRGLVAAGNR-LGIFS-----  
APVRTEATSVGRLGN-----  
ARDFDRVPFRSLGLETQVRLLRHWDGDVVVLTGGTGVGKTSQVP-----  
KLLLWFNYLFGGFDGYD-----AF-----RPEF--  
RERKVALSLP-----  
RVELVRMNAGVLLRSLG-----FDDFDGSPVEMGYGNMDPALA--NSRPRRYG-  
L--VVATNKLVIIGRLGQFSVAVLD-----  
EVHEHDSIADIMIAVLRKNPGR--VRALTMTATLEDEPALRAFFP-KAAFVHVEG-----  
GTLFGIKTLSVRNKHDFKQRFQYLALERRL---  
ISQTLRVLRLP-----AGSSVVVFLASVNQCLQYARFLEPLH--  
PELAFYVVHGKVPNIGALLAEIY--ASP-----KPAVVLSTPYLESSVTLRTAAY-----  
VYDSGRVYVAKPFGGEERFISRAMMMQRKGRVGRVSPGTYVAFYDAALLAP-  
IKRI-----DYD-----  
FLHEYVIYFRHFGLALPDDLIVRPTDPGPLRRTVAYLAGFGIPDEQ-----LY-  
EIATTRFVKLVEYLRYAAGGPVAE-QLNEYERGERP-----LD-EPLAAALRALNLRKVRTRT-KT-  
QTGY-AYAMRVLFGPYRGA-----EFSVSHRKFKVA-AY---VYMIAPGV-----FVE-----  
>u1\_Myxvi9633680  
-MENHLPN---IF-----YFPNCVTAFPYRYTQKELDDM-KPVDRER---  
FKYAVFPL-----IKHRWCRAVVRDNTFKLNVETSKRLRRVAYPTLVP-----  
LVGVNAALREYVM---EDGTKISFECYSYLICKRTTSLHD--VDDSTIRGLVEGGNQ-LNIFT-----  
NSVGSVTNTVGIIGN-----  
PNPFAKVPLKSLHPSMCKIFTSWARRVPVLTGDTGVGKTSQVP-----

KLLLWFNYLFGGFTDLS-----TL-----TFEV--  
QEKPIVLSLP-----  
RVALVKLHSETLLTSLG-----FEEIHGSPVSLKFGNMQERFV--NTRFSRYG-  
I--VFSTHKITLNTLFKYSTVILD-----  
EVHEHDQTDGIIIAVCRKYIRK--LDLFLMTATLEDDRRRIEEFFA-ESV FVHIPG-----  
GTLFISEAYVKNSND-PLNRFMYIEEEKRN---  
LANAIKTYTPP-----KQSSGIVFVSTV SQCEAYKQYLSERL--P-  
YKFYIIHGKVQNINDVLSDIY--DND-----GVSIIISTPYLESSVTVRNATH-----  
VYDTGRVYIPSPYGGCESFISKSMRDQRKGRVGRVNP GMYVYFYNVSELRP-  
IKRI-----DFE-----  
FLHNYVLYAKVFDLQLPEDLFVKPTNVTRLHDVIEYIRSFDISDDV----WT-  
RLSSYYIHILEYAKVYARGGSGAL-ALDSFERTGN-----LT-DDALDAIKSLNMRAKILSHK-  
KASAHTY-ALRCKLLFGVYAGK-----VFTVYHKRPLT--GY---ITMIAEHS-----FIPDY---  
>u1\_Yabdi12085032  
-MDNHLPE---IF-----YFPNCVDIFSHQYSQIEFNKM-EKTTKKN---  
FSLAVFPI-----IKHRWKKS FIVIDNGIFKLNLES--  
ENNNNKIKKNIKIDTYPESIDIQLKIYTV---GN-LKITFECYSYLMCKQIKDINL--  
FNEYILRGLIEGGNA-LKIFS-----KKTGYVNSSIGIFGN-----  
ESSFLKIPLTSLKPLSQKIFNAWLSNKPVILTGGTGVGKTSQVP-----  
KLLLWFNYLFGGFKNLN-----NI-----N-NF--  
HERQIVLSLP-----  
RVTLVKLSKTLSSIG-----FKQINDSPISLKFGSMPDNLI--NTNPKPYG-  
L--VFSTHKLTLSKLFDYGTIIID-----  
EVHEHDQIGDIIISVLNKNINM--FNSLFLMTATLEDDRERINDFFT-NPLFIHIPG-----  
GTLYNISEIYIKNTSS-FLNKYEYIEEEKN---  
ILNAIKKYTPL-----KKFSGIVFVSSVSQCEEYKKYLSQKL--P-  
YDFYIIHGKVLNIDDMLKNIY--SSK-----NVSIIISTPYLESSVTIYNVTH-----  
IYDTGRVYIPAPFGGKEMFISKSMMEQRKGRVGRVRPGLYIYFYDVLCCLKP-  
IKKI-----DFE-----  
FLHNYVLYAKYYNLTLPNDLFIIPNNLDNIKKTEEYIDSFNIPIISK----WM-  
YILSNYYLRILEYAKIYIKGGIYSK-SLDL FERENI-----IN-NVVVDSIKSLNMRAKVL SFK-KK-  
NNIY-VLTCEIMFGVYL GK-----KFNLTYRKPLT--GF---ILMITECN-----FIPEY---  
>u1\_Vacvi66275874  
-MEKNLPD---IF-----FFPNCVNVFSYKYSQDEF S NM-SKTERDS---  
FSLAVFPV-----IKHRWHNAHVVKHKG IYKVSTEA--RGKKVSPPSLGK-----  
PAHINLTAKQYIY---SEHT-ISFECYSFLKCITNTEINS--FDEYILRGLLEAGNS-LQIFS-----  
NSVGKRTDTIGVLGN-----  
KYPFSKIPLASLTPKAQREIFSAWISHRPVVL TGGTGVGKTSQVP-----  
KLLLWFNYLFGGFSTLD-----KI-----T-NF--  
HERPVILSLP-----  
RIALVRLHSNTILKSLG-----FKVLDGSPISLRYGSIPEELI--NKQPKKYG-  
I--VFSTHKLSLTKLFSYGTIIID-----  
EVHEHDQIGDIIIAVARKHHTK--IDSMFLMTATLEDDRERLKVFLP-NPAFIHIPG-----  
DTLFKISEVFIHNKIN-PSSRMAYIEEEKRN---  
LVTAIQMYTPP-----DGSSGIVFVASVAQCHEYKSYLEKRL--P-  
YDMYIIHGKVL DIDEILEKVY--SSP-----NVSIIISTPYLESSVTIRNVTH-----  
IYDMGKVFPAPFGGSQEFISKSMRDQRKGRVGRVNP GTYVYFYDLSYMKS-  
IQRI-----DSE-----  
FLHNYI LYANKFNLTLPEDLFIPTNLDILWRTKEYIDSF DISTET----WN-  
KLLSNYYMKMIEYAKLYVLS PILAE-ELDNFERTGE-----LT-SIVREAILS LNLR IKILNFK-

HKDDDTY-IHFCKILFGVYNGT-----NATIYYHRPLT--GY---MNMISDTI-----FVPVDNN-  
>u1\_Orfvi41057099  
-MENHLPD---ML-----MFPNCVSVFPFEYSLEDVFRL-PEERRA---  
FAMAVFPL-----SKHRWRGARLQORDERSVWLSVEE-DRGRALGERNCW-----  
LSDVAARMVD---DEGRAVTPEAYAFMRAAPGARVAELAADAGVLAGLVAGGNA-  
LRVFSSESTQAREGWKARSVGLGN-----  
AAPLAPVPLASLRPEVQRELFAAWIGRRPVVLTGGTGVGKTSQVP-----  
KLLMWFNYLFGGFERLD-----AV-----R-EF--  
AERPLVLSLP-----  
RVTLVRAHTATYLASLG-----FGSADGSPVSPRYGAIPDAER--NTAPRTYG-  
L--VVATHRLTLTAIRRYDTVVD-----  
EIHEHDQMGDIVVAVARKLGSN--MRSLVLMTATLEDDRARLEEFLLD-RPAFVHIEG-----  
DTLFPPIREVYVKNTQQ-PPLSRKYAEAEQLN---  
VVQALGTFVPE-----QGKCGILFVATVAQCALFAETIEARH--  
PGLLVRVVHGKVPVSAVLEEVY--AAD-----RPAVLVSTPYLESSVTVRTATH-----  
VYDTGRVYVPEPFGGRETFVSKSMYTRKGRVGRVAPGTYVRFDFTRLALP-  
LKRI-----DSE-----  
FLHPYVLYARIFGLTLPDDLQVPSDLALLRRTEEYVDGFGISLSR----WT-  
QLLDRHYMHMVEYAKVYVRRGRLAA-ALDAFERTGV-----MT-HEATEAIRAVDMLAVVLNVR-KS-  
KDRY-RAECKVLFGPFAGK-----KFVVAGRRPPG--SH---VLMVTDRV-----FIEAEPFF  
>u1\_Mo1co9628982  
--MKNLPG---VF-----  
AFPDNETIFAHAYSQRELEAMLPARAGAQPFAFAYAAWPL-----  
SKHRWRGAFVCRQRGVLKLNLEL-DAGAFERVPRSEAERFEPEQSDARALMHRG----  
ADGTVMSFECYSFLRCRPGLELRE--AGLALLRGLVVGGR-MRIFS--  
GVRAGASAATSAGMLGN-----  
ESPFERAPFASLRIDAQAALFRAWAARRPTVVTTGGTGVGKTSQVP-----  
KLLLWFNYLFGGTEDLD-----VL-----APA---  
RERPVLVSLP-----  
RVALVRMNGHALRRALG-----FDALGSPVELRYGDLAPADA--NSSRSPFR-  
L--VVSTNQLTLGALFAHGTVILD-----  
EVHEHDQMADIMLAVLRVHRAR--VDSIVLMSATLEDDRERLQEFFP-DAEFVHIPG-----  
STRFEIRGVYVRNSSD-PRDARAYDEEERN---  
VSAALSAHRPR-----AGRCGILFVASVAQCEDYARLLTREH--  
PELGVYVHGKTPNVDALLAEVY--ASA-----RPCVLVSTPYLESSVTIRTVTH-----  
VYDTGRVFPVAPFGGRQMLISPAMRTQRRGRVGRVMPGTYVYFYDPARLAP-  
IKRI-----DSE-----  
FLYNYIIYARHYGLVLPDDLQVPSDLELLRRCEEYLDGFGGLAPER----LF-  
ELASTRYLRMVEYAKIYARGGARAE-ELNRFERDGV-----VT-EDVLASIRALNLRARVLSAR-AR-  
RGQF-LHTCEVAFGPYAGT-----RFLANRRRLR--GD---IFMVTES-----FVL-----  
>u1\_Squvi549059652  
--MEKLPD---MY-----LFPNGVSVFTHEYSHSEFDTM-SARDRAG---  
FSLAVFPL-----  
TKHRWRGAYATLHEGVFRVSAELDTAERPARASARAARAVHPREVEVSNGTFFD---GQNR-  
ISFECYSFLRCAKHTSLAA--MDEHVLRLMVGGR-MRIFS-----RRRGGPRASVGLGN-----  
RKPFQPVGLASMLPEIQREIFSAWTSRRPIVLTGDTGVGKTSQVP-----  
KMLLWFNYLFGGFSALD-----RV-----T-DF--  
EDRPLVLSLP-----  
RVALVRMHGAALLES LG-----FGELGGSPVSLRFGSMPEEEV--NRDPRPYG-  
L--VLSTHKLTLARLFGFGTVILD-----

EVHEHDQLGDILIAVARKHLHR--LHSLMLMTATLDDDRERLEEF--SPAFVHIPG-----  
GTRFPITEVYVRNSVR-PEERARYAEEELRN---  
IADALRRHRPP-----DGACGILFVASVSQCESYKQYLERRL--  
RDVAFYIIHGKVKDVRVLAEVY--ANS-----GPSVIVSTPYLESSVTVRTATH-----  
VYDTGRVFPAPFGGKQMIISRSMTQRRGRVGRVPGVYVYFYDAAAMAQ-  
IRRI-----DSE-----  
FLHNYVLYFRQFGLLELPGDLLVRPGDLSKLEAVEAYIDSFGLAAAR-----WE-  
AILNKYYLRMVEYARVYARGGAAA-ALDVFEREGV-----LG-AEAEAILSDDLRRARVIGVR-HR-  
NGKY-VHTCEVLFGPYAGT-----LFMLTHRRPMR--GT---VRMISSDS-----FVEPA---

-----  
-----  
NCV0G0271, DNA-directed RNA polymerase subunit beta  
-----  
-----

>ASFV\_9628161  
-----

MEPLRPQITYGPIETVDNEELTEADMLSFISAAVNSTGLIGYNIKSFDDLMDNGIPQIVKQMFNV DITY-  
-  
KDQRDHEIDKLRRESVQIQFNFTDVNIERPQHRNYSQGNKINLLPNKARLCGLSYSGPVNLAAEVILTAH  
YSNGRQEVKRASIPPF--QVSTFPIMRGSNRCHTHHLSKTAKKEIGEDPNEPGGYFIARGG--  
EWWVDLLENIRFNTLHIHYHTMQQGNNEIIRGEFIS-  
QPGGAFENSSQIIIRYMTTGAITIEIN-----  
STKFSKLRIPWYLIFRMFGMTGDDSIIEQVVFDESNSPVNTFMIEILE-----  
KSIHVLDPIFQPVQHEPNREKIIQFLSEKVS KFVSNPSAYKSDENAVQYLNERQLTILDKILLPHMGQTA  
DTRVRKLRFLGLLIHKILLVIMNVFPPTDRDSYRTRKRVHSGVSLAKAFKAI FNTSVI APIINGFKELLK  
QTA FEELTQRNII EAFSAALSKNTASDLNRSMEQSIISGNKTIMVRQRPIVNRVSTQSLERKNLLNTISA  
LRTVNTHTNNTNASKQTERADMRRVHASYPGYICVAQSADTGEKVGMSKQLAITANVCTAGEVLSLKQRL  
-LSDPAIQQLADV-----SNKDIVRK--GLARVFING--EWIGCCTN---  
AFELAQR YRMFRREGKIVHPHTTIYWD-----  
SMVDEVEFWLDVGR LTRPLLIVDNNIEKYNQACYKAAEARKKGDKDWEKHKIPFIQNTRFTSQMAKDILA  
GTLTLEDLVAQGICEFITPEEAENCLVAFSIIELRKHKHDVTRRFTHVDVPQ-----  
AILGLAALVSPYANCTQPARV TYETNQGRQTGGWYCFSWPYRVD MNRFFQFY NEMPLVKTIAHNY--  
VIPN--  
GLNTIVAYMIYGGYNQEDSVIVSQSFIDRGGFAGTFYREEKVELES DIESFGKPDPLITKNL KPGANYEK  
L-VDGFVPVGT VVKGDIIIGK VAKIRGEK-----  
DELNKYIDRSVMYGFDEPAVVDAVMRPHGPNDEIFGLMRLRYERNLNIGDKMSSRSNGKIAALALPTSD  
MPFTEDGLQPD LIVNPHSHPSRMTNGQMIETT VGLANALQGVVTDGTAFLP INVQLLSERLAQEGLRFNG  
-----CQKM-FNGQTGEY-----  
FDAAIFIGPTYHQRLQKFLVDDRYAVASYGPTDAL TGQPLDGKRSHGGLRLGEMHWLTAQGAMQTIIE  
KSHDDSDGCI-SYICRNCGEP AIYNASHPI--YKCMNCD---  
VQADIGMVDSRRSSIVFQHEMRAANVNITSVLS---PRVFQPA-----  
>u2\_Me1sa9631469  
---MIPN NIEEYIAKLYLSS-DNKLNIKSKSLINIEIP-----FRNF-NHDLSAF-----  
FTREEVINVKSSKSSKE-----EII LKIEFSGKQENKKS-----  
YIYSSFDNKSFDL NIGICVSIFKKIINQDGESKLQLIYTYNCTPNEIRIPQYISYGGNTPMIDNSLT---  
---ETNPPGGSFILSKGITK FVTCRIEQMYV---YPKLKKMNKPF--  
IFHCSFISKHPSFRMINEKIYPPQFLTI-DIDYTPGKIK-  
CVIDSKKAFIQIDLILLIHFYSEMSFEDIESI IKRGF---NNSIVRKIQILI-----  
KNSQMILAN-----NENNIHTYVSNVIKE--AYINKFKN-DKNITLQAYTNS-----LLSNFL-

PHITNG---RINKGMYLISIFRQFIVGMFQPDYDPKDNLATRRISTAA----DIFESIICKSS-  
IDTLLYQIKEKSNEFKIESKINQINNALSQIK---LIPQITPAFN-NFFNMQDT---KNSDVV-  
KISTKS----NWQEPPIIVSNAV-MRGS---  
SIELTKSLEARNLHESTIGVLDIYDTPDHGSNAGLIKRLTIGTIISH----  
HTLKIRERIFNEVNEYILTY-----  
AKTNNIINKINGVIISIIIEESSEFYVTSIDQSKVDQFVKDIKLAKISNIFCTNDIGIEVIPIHEMDKIKK  
INVPTNRYFQIRINVGNNRRALQPMFIVENGILNLDK---YKIDKNEI---  
MSFSDIMLKYNDIIEF-----VDVGQALYSRICN-----  
SIKEFKQYSLEFRKTIQYVRLPNYIYFSQLVS--CMHDVGMAGV-----  
RGTFGAAQYKHIIITGPQDNILNKFESCTYLSFPLQKSCVTNIPKDISGISKNGMGQHILVGGFFSYN-  
KNIEDGVIVNKRSENGML--SVITLNAIVAEVSDIQINNNNP---  
SPDNANNYSKINVMGLPDVGTVMVKN DALYRCLKPKYKET-----  
DDNTRLFDKSEPYVSNYPAVVERT-RKQGTDIKVEILLSSY--RRLAIGDKL-  
AKSVQKVTVADILDESELPYTKDGLRPDLIFNSTSITSRKTFFMYFDAML TNMFLIPYDENNNT-  
RYINYPTYTDMTSTDIIEYIRNKIKPLYPN--  
ISDEELNDIVYCRHVIYNPDTHKPMELVENGKTKAFVAPILFSRLSQMSA-  
DKLSVRNRGRDLKYGQPPS-  
GKKKGGGIGIGEMEVDVFLTYSVPSITLELLSDPSEKYL PAMACSNCGIFATYEDSLEIKRWKCLQCENI  
GLSPKIIISFRLPYSTKMFLNNTNMRGITFKI-REKQMPTYYSISSTK-----  
>u2\_Anocu578887571  
----MIKNIEDNIAKLYLNN-DRLLNIKSKALINTELP-----FRNL-MHDIPIL----  
FNREEIISTR LTKSTTE-----NIVMKLEYIGKEENKKS-----  
FLYSSFEKGSFDMNISIAVSMIKRITSKTGIED-  
ELIFRNEYPHQEIRIPQYVSYGGNII EYDNSIT-----QTNNSGGFFILSKGLMKFVTLRIEQTSV---  
YLKRKSSKPF--VFHASYVSKLSSFEMINEKIYPPQYLT I-DL DLNPNKIK-  
CITDSKKS FIEVDIILLIKLLSGWEFDKLTAIITSKF---DDDIRDKINIIII-----  
NNAKNILQE Q----FNNNINDYITYEVKR--SYNKKFKKEKDSPTLQEYFNY----CFSNFL-  
PHMRKYG--RLQKSMYLISIFRQFMISIFQPEIYDPKDNLVTRRISTAA----DIFESIIRNA-  
IDISFQQAKEYRDKSESDTIQINNIISQFK---IVPQITSSFN-NFFNMQDT---KNSDVV-  
KTSMHY----NWQEPPIIVSGAV-MRGS---  
SIELTKSLAARHLHESSITVDFMFDTPDHGPNTGLIKRLSIGTLISH----  
YTINIRKQIFDEVYEFIKSN-----FVNKNLIDEINGVMISIIDE-  
SEFYITSIKESEVHNFIKKIKETKRNFLIIVRDIGIEIIRKHSLDI IKKIYIPTDTIMQIRINVGNKRAI  
EPVFFVEDGKLNIRK--YKNLNEELNNYSFTNLIINYPDIIEY-----  
IDVGQSIYSNICN-----SVIEFDKYDIDQKKYEVRLPNYLFFSYLTS--  
CMYDIGKMTGV-----  
RGTFGAAQHKHIIITGPQDNVNLNKYDSCNYLAYPLQRPCITTIPMEISGIARNGIGQHTLVGGFFSFN-  
KNIEDGVILNKDSVDRGLL--SVITLMPVKNEISDTQINNNNP---  
NPENSNNYSKISVSGLPEVGTVLVQGDALYRCLKPKFKDG-----  
DDNNYIFDQSEPYSSHYP AVVERS--KRGTDMIKIDILMSSF--RKVEVGDKL-  
AKSVQKVTIADIMESHMPYTEDGEVPDIIFNSTSIISRKTLPMYFDAML TNMYSIIPYNDGGEI-  
EYINYPTYTELTAEDLIIYITNQIKKKYPN--  
IPDAMLNDIISYRKTIFNPYTHKPMTLESNGYKTKAFVSPILFCRLSQMSA-  
DKISVRNRGRDLKYGQPPS-  
GKKKGGGIGIGEMETDVFATHGAILTLNELLSDPDERYL PANICSNCGIFATYEEDIEIKRWKCLQCENI  
GLSPEILNIRMTYATKIFITILNMRGITLIPIKKEYDEIYLSQY-----  
>u2\_Mytse506497812  
---MNFDSIEEGVANLFLQN-DPRLDIKSKVLLNVELP-----FKNL-NYDLPTL----  
FNREEVIYKKISKSGNE-----EVIMKINFEGKEDSKS-----  
YIYSSLDNKG FYT YISISISISIRKNTSIDNKIEYKKISNKTYSHTEIRIPQYISHGGNTAECDNSLT---

---QSNPPGGYFNVSKSLKMMVTTRIEQTYV---YPKRKKTKQKAF--  
TYHLAFISKKPSFLMINEKLNPPQFLTL-DIDFNIDKIK-  
CVIDSKKTFIQIDVIALIIALSNDNIDVVYDKISSGF---NKEISDSIKILV-----  
ENTKNILAE-----YNGDARKYVDKIIET--NYLKKYI--KNEISLQDYFND----IFNDFL-  
PHIGKGN--FKYKCMYIISILRQSFVSIFQSDVYPDKDNLATRRISTAA----DIFENIIRTS-  
IDNSFELARDKYKTYISGSSKNNNINNILTQVK---LLPQITQAFN-NFFNMQDT---KNSDVV-  
KIGHTS----NWAESIYISNAV-ERGV---  
SIELTKSLAQRKHLASSINVLDMMDTPDHGKTGLVKRLCISTIITH----  
YPIHIREELFNEVKKYIEDN-----VKNNKKEDEINGVFISIIDE-  
SEHVIARIKNSEVENFIKEFRHAKISGFFKRNDIGIEILKFHDIDKIKQIYIPTNRYFQIRINVGKCRAT  
IPVFRVENGELIFRK--YDPLKSYIDKSNSTDLITKYDIIIEI-----  
IDVGQSIYSNICD-----  
TVTEFDSYDKKQRMKYDYVRFPNLYFSYLTSTGCMYDIGKMTGV-----  
RGTFTGTAQSKHIITGPPDNIMNKYDTCNYLAYPLERPSITNIPMEISGIARNSIGTHVLVGGFFSN-  
YNVEDGVIVNRESINRGLL--SVISLISVKNELSDTQINNNNP---  
TPENSNNNYSKITATGLPSIGTVLVQGDALYRCLKPKFKND-----  
DDNRYIFDQSETLSNTYPAVVERT-RKQGTDLIKIDMLSSY--RRLSVGDKI-  
AKSVQKVTVSKIMDEKDIPYNENGERPDIIIFNSPSIISRKTLPLYDEVSLCNMFSKIPYNDKGDV-  
QFVNYPIYTDKSPQDKYNFIKNEKQKIYNN-  
NLSDEIDDIIHCRQILYHPYTKKPMSLIEGDKKTKAFMGPMFLCRLSQMSA-  
DKISVRNRGRDLKYMQAPS-  
GKKKGGGIGIGEMESDIFSTNGSVYALHELLSDPDEFYLPANICSNCGIFATYEENIQIKRWKCLQCENL  
GLSPEIHKVRLTYAIKIFITLLNARGISLVPIKPKNNIYVSNINK-----  
>u2\_Amsmo9964380  
---MNNNPIEEDIANLFLQC-DPRLDIKSKVLINVELP-----FKNL-NYDLPTL----  
FNREEVIYTKISKSGHE-----DVIMKITYEGKEDNKKS-----  
YLYSSLDNKGFYTYISISISIRKITSLNKIEYKIISNKTYSHTEIRIPQYIAHGGNTSENDNSIT---  
---QSNPPGGFFNVSKSLKMMVTTRIEQTYI---YPKRKKTKQKAY--  
TYHLAFISKKPSFMMINEKLNPPQFLTL-DIDFNPKIK-  
CVIDSKKTFIQIDVIALIIALSNDNIDVVYKISSGF---SDDISDSIKILI-----  
ENTKNILSE-----YNNARQYVDKIIIEI--NYIKKYP--KNEITLQDYFNN----IFNDFL-  
PHIGRKG--YNEKCMYIISILRQSFVSIFQSDVYPDKDNLATRRISTAA----DIFENIIRTS-  
IDNSFELARDKYKTYISGSGKNNNINNILSQVK---LLPQITQAFN-NFFNMQDT---KNSDVV-  
KIGHTS----NWAESIYISNAV-ERGV---  
SIELTKSLTQRKHLASSINVLDMMDTPDHGKTGLVKRLCISTLISH----  
YPIHIRKQLFEVREFIENK-----VKHTLKEDIISGVFISIIDE-  
SEHVIARIKNSETESFIKDLKYAKISGLFVKNDIGIEILKFHELDNKNQIYVPTDRYFQIRINVGKCRAT  
QPVFRVENGELAFNK--YPNLHAELKESNSTDFVTKYDIIIEV-----  
IDVGQMIYSNMCN-----  
TVTEFNYSLEQRKKYDYVRLPNLYFSYLTSTGCMYDIGKMTGV-----  
RGTFTGTAQSKHIITGPPDNVMNKYDTCNYLAYPIERPSITNIPMEISGIARNSIGTHVLVGGFFSN-  
YNVEDGVIVNKESINRGLL--SVISLMSVKNELSDTQINNNNP---  
SAENSNNNYSKISATGLPSIGTVLVQGDALYRCLKPKFKND-----  
DDNRYIFDQSETLSNTYPAVVERT-RKQGTDLIKIDMLSSY--RRLSVGDKI-  
AKSVQKVTVSKIMEEEDMPYNENGERPDIIIFNSPSIISRKTLPLYDEVSLCNMFSKIPYNDKCDV-  
EYINYPYIYTDKSPDKYNFIKKEKKIYNN--  
VTDELENIYCRQTLYHPYTKKPMTIKEGDKETKSFMGPMFLCRLSQMSA-  
DKISVRNRGRDLKYMQAPS-  
GKKKGGGIGIGEMESDVFATNGSVYAIHELQSDPDEFYLPAHICGNCGIFATYEENIEVKRWKCLQCENL  
GLSPEIHKMRLTYATKIFITLLNARGISLVKDNQSIYISDDNTINT-----

>SGPV126

-----MDKKIGYLFLKP-DPKCGVFYRPLDFQYKS-----YRNFLEFRINEI-----  
LEIDREL--HSDKTGDV-----KMFLKIYNIKTFPTNT-----  
MTLHALKNKGYTCSVKFNIMLYSKTRTDSGIKEAIIILNYTGFNDNMINVPLMVG YGLGDVFGSGAIL----  
---YPNEIGGTFLNYRSIEKIGINLLEKTTA---WPKFKKV-KAG--QYAFSFSISPPHIT-----  
PPVYRYF-KIVLDFNNPEAFVISSQKMFITVNIILILIKYLLKCNMEFIRDELLNGL---  
DPVNDYFLHNVMFVTGAENKIQIVTTSSV--VRSVVKFINFLVEK--EYNSD-----  
RSKLTLEKFKNN----MFTNFL-PHIHNND--  
DVSKGLYLLLVKMFLLFAIKPHEYPDRDSHATRRIFTYG----SYFEQVTIDE-  
LENFVTKIKN-----AGSTVNHMSM---TTMGFNSAFN-NLLSGRFR---  
KTISPHIRTHVHY----SWMQNVVIPRSI---  
GFYDPQVKIAKIFNCRQFHPSQYGFPCPTDIPDHGESVGLVIQLALHSYITS-----  
IKLQEYKQIRNEIIREIKNILGVKSDDPATSAQMMRFKTVPIMIENK-----  
IICSVAPDLAIKIVEVIRNIKRSGMFCVNDFGVTYIQ-----  
GYIRQIKFNIGAGRVVRPLLVIDNGELVMEK--YRDEIEAF--  
DGTWSELLETFPGVIEI-----IDIEQFIYSNIE-----  
NQKVYEGMSLEQRKLYQYCDFPEEFRNGYSAS--CLLGINHNAGP-----  
RAIFGCAQVKQISCLTSDILNKIDNGLHMIYP-  
EKPLVSMGIITSLISDNTFGQHINVALTSCEGMNQEDAIVCRQGF LDNHGM--  
NILSTKKTQLDIPNENFRASQP-----  
DYTVHNYGKLNHLGVPVINSILEAGDAMCKNVSIRVIDNLAGEVSKEAIKSDISEGYTDIYPGRTVRV-  
QIENSDKVKVRLLTVSE-  
RQPIMGDKFTSRTSQKGTIAKILPDHEMPYMEDGTPDFIINSTSIYSRKT LAM LLEMILTNVFTHKPIN  
EQGKV-RYVNFPSFNNVALESYFDFGSTCIKTAHPD--WTPEQVND E L FCEQTL YNPDTHEP-----  
YKSKFMVGMYYLRLRHMIIL-  
DKAAAIRSRGKTKLTKQPNEGRKRGGGIRFGEMERDCLIGHGAAFTLREILHDSEEDRQKAKMCNECGDF  
LMLSKTESYQYWTCSRCDIAKLHPTYTEADLSHVVKVFKTQLGAQGIKMLLKESETPSVYYTKP-----  
-----

>u1\_Nilcr115531811

-----MEQKIGYKFLEP-DPKQGVFYRPLHFQYES-----YSNFIRHRLHEI-----  
LSVKRQL--LSLKNTE-----QVTLEITDIIIVTPPKYS-----  
PIIASLKGKGYDALVFTFVNIYKEVMTKDGIQSQKIIISYEGNDSQLIKIPLLVGYGNKNAIDSMKYL----  
---SPNIIGGHFINKQSIEKIGINLVEKITT---WPKFKVV-KPN--VMSFSFSSVSPVDVV-----  
PIKYRHY-KITMDISQLENCNISSKTFITVNI VLLIQYMNADLEFVRANLTYDM---  
PTEVSYLVNCLL-----ESTKLITDCKSSARKQFSVHNYVESLIQQ--EYAKQ----  
KSTLSLEEFRDD----MMANFL-PHMHTSS--  
NLMKGLYLLHLLRKFIFAQYFTSRYPDRDSMVCHRVMYTG----KYFEILAIIEE-LENYINNIKMD-----  
LMNNIKNKS VYNVSTHIL---TTPGFNQAFS-NLLAGKFK---KTDGSF-RTHTHY----  
SWIQNISIPRSI---  
GYYPDQVRISKMF SIRNYHSSQYGYFCPSDIPDHGTQVGLISQLSVHTSITT-----  
ITTKAYLQLHDALVKHLYSY-----DKQDVSYYANGFAVTIENC-----  
FVASLNP ARVDEVDDLKRRKRLGYFGNLEFGVTLVR-----  
DRMNEVRINIGSGRLVRPLLVEDGELVMHR--  
EAERLEPLLDELTFSDLQARFPHVEM-----VDLEQFHFSNVCE-----  
SVSKFDGLSPDQRRRLHYCDFPVEFRDGYVAA--TLTGINHNSGP-----  
RSILGCAQAKQAISCLSSDIRNKIDNGIHLFP-  
ERPVLSKALETSKIAFNCFGHHVIALMSYKGINQEDGIVIKREFVERGGL--  
DIITAKKIQVEIPLNFNNQES---VKSTA---YSKLD CNGLVRINSFLEHGDSIAKNISSRNLED--  
EFVTDNQISFDISEIYTEIYSSRVERV-QANFTDKVRVRALTIKE-  
RKPIMGDKFTSRTSQKGTVA YIEDEKDL PYDEDGISPDII VNSTSIYSRKTISMLIEIILTAAYA AAKPFN



NRGQN-RPVCFPSSNETDISTYLQFAKECYRSVRPD--LSDPALEDLAYCERTLYEPETDRT-----  
YSAKVLMPGIYYLRLRHLTL-  
DKATVRCRGKTKLIRQANEGRRKGGGIKVGEMERDCLIAHGATNTITEILRDSEEDQVDVYVCENCGDI  
ATHRDSVYF-----  
CIRCSKLNLSPNLVKVSTTHVSKVFLTQMNARGIQIKLDFESNEPLYDE-----  
>u1\_Orfvi41057164  
-----MEQALGYKFLLP-DPKDDVYRPLHFQYES-----YANFIKHRLKDI-----  
LTVRRTL--LTFKNGTE-----SIVLEIDDVKISAPEFS-----  
PIVASIKGHSYEALVTFTVNIYRHVMTKDGLTVTKINSYEGTDSLVLKPLLLIGYGNKNALDPSKRV---  
---VPNAIGGVFINKQSIEKLGINMIEKITT---WPKFRAV-KAN--SFTLSFSSISPVHVM-----  
PARYRHY-KILLDVNQPDNFVISSAKTFITVNVIVMVQFLADVTLFVARNLCFDM---  
PPEAAHLATALV-----ESAKTVPA-----GADVAEYVNALIAA--EHAQK-----  
KSTLSKEEFRYE---MLSNFL-PHMQESA--  
NQLKGLYLLSLVRKMFVCFVFPNRYPDRLSLVCHRVTYTG---RYFEALAMDE-LETYIGNIRND----  
ILANHKNRGTCTVNIHVL---TTPGFNHAFV-ALLSGKFR---KSDGSF-RTHPHY-----  
SWMQISISIPRSV---  
GFYPEQVKISKMFKVRMYHPSQYGGFCASDVPERGPQVGLISQLSVLASISN-----  
IRTADVELTKRVCYVRSY-----PARDISYFETGFAVTVENA-----  
LVASLNPAIVDAFVLDLRRRRLGFFGNREIGVALVR-----  
DRMNEVRINFGAGRLIRPLLVEVGVLMVDA--  
EAERLERDLSALTFSDVLRFPVHIEI-----VDVEQFSFSNVCD-----  
SVQRFRTLPPPEERLDFDFCPAEFRDGYVAS--SLVGINHNSAP-----  
RAILGCAQAKQAISSCLADLRNKVDNGIHLMFA-  
ERPIVVSKALETSKIADNCFGHHVTIALMSFRGMNQEDGIILKRQFAERGG--  
DILTCKKYQVEIPLNFNNRER---VRSAA---YSKIDVNGVVRLNAFLEQGDARIARNVSSRTLDD--  
DFVADNQISFDIAERYSDIYAARVERV-QADLTDKVKVRLTVRE-  
RRAILGDKFTTRTSQKGTVAVVADETELDPYDENGIAVDVIINSTSIFSRKTLMLMEVILTTAYGHKQFA  
EDGSN-RPICFPSTNETDFETYIEFARRCYALSHPEAAADDPEFEHRVFCERVLFDPETDEP-----  
FAARVFFGPLYLRLRHLTL-  
DKATVRCRGKTKLIRQANEGRRRGGGIKIGEMERDCMISHGAAFTVAEILRDSEEDAQEVLCENCGDI  
AARLNGTHV-----  
CIRCSKMSLSPVLTRMDSTHVSQVFTTQMNARGIKIRVEFEKQDPCFYGTPKRFSLAPEESLFPED-  
>u1\_Canvi40556201  
-----MDQKLGKFLFEP-DPKQNVFYRPLHFQYVS-----YNFICYRLKEI-----  
LSVNRRTL--LSFKNDTE-----KIILKIDNIKITPPHS-----  
PIIASIKGKSYDALVTFTIDLSKEVMTKDGLMVTTISRUEGKDAQLIKIPLLLIGYGNKNPLDNSKRV---  
---SPNIIGGVFINKQSIEKVGINIVEKTTT---WPKFKIV-KPN--AYTFSFSSISPVIL-----  
PTKYRHY-KISMDLSQLENCSSISAKTFITVNIILIKYLINQDLDFIKNNLSYDM---  
PKETIYLIEAII-----ESTKTILD-----EDFNMYEYIDNLIEI--EFQKQ-----  
RSITKIEDFRYE---LMHNFL-PHMVNSS--  
DQLKGFYILGLLRKFYIYIYTSRYPDRDSMVCHRVLTYG---RYFEILANDE-LENYVTNIKND----  
ITNNHKSIGKICSVSIHVL---TTPGFNHAFS-GLLSGKFK---KTDGSY-RTHPHY-----  
SWMQISISIPRSV---  
GYYPDQVKISKMFSVRKYHPSQYAFFCPSDVPERGPQVGLISQLSVLTSVSN-----  
IRTTEYIDLKEKIMEYVYSY-----DKNDMSYFETGHIITIEND-----  
LVAAINPELVDFVDVFKFKKRENYFGNLEIGISNVK-----  
DHMNEIRINIGSGRLIRPFLVVYKGGELVMDT--  
VSEELDQRLNTITFSDIQREYPHVIEI-----LDLEQFVFSNVCE-----  
SVSKFRQLNDEDKLYDYCDFPNEFRDGYVAS--TLVGINHNSGP-----  
RAILGCAQAKQAISSCLSSDIRNKIDNGIHLFP-

ERPIVLSKATETSKIAINCFGQHV FVALMSYKGMNQEDGII IKKEFIERGGL--  
DIVTAKKHQVEIPVENFNNRER---IKSTA---YSKLRNGLVRLNAFLEAGDAIARNISSRTLDD--  
EFVADNQISFDISEKYTDMYKSRVERV-QVDLTDKVKVRVLTMKE-  
RRPIMGDKFTSRTSQKGTIAYIAPESLPYDKNGLTPDIIINSTSIYSRKTISMLVEMILTSAYSVKPYM  
NNGQN-RPICFPSSNETDIEEYVEFARKCYQHAMPN--LSKEELENEVYCESVLYDPETDKP-----  
YKTKVFMGPLYYLRLRHLTQ-  
DKATVRCRGKKTCLIRQANEGRKRGGGIKFGEMERDCIIA HGAANTITEILKDSEEDYQEVYVCENCGDI  
ATKKNHVVY-----  
CIRCTKLNLSLTIDTTHVSKVFLTQMNARGIKINLTFEGQNPLFYKPMKPIDLSPTVLKP-----  
>u1\_Vacvi66275941  
MKKNTDSEMDQRLGYKFLVP-DPKAGVFYRPLHFQYVS-----YSNFILHRLHEI----  
LTVKRPL--LSFKNTE-----RIMIEISNVKVTTPDYS-----  
PIIASIKGKSYDALATFTVNIFKEVMTKEGISITKISSYEGKDSHLIKIPLLI GYGKNPLDTAKYL----  
---VPNVIGGVFINKQSVEKVGINLVEKITT---WPKFRVV-KPN--SFTFSFSSVSPNVL-----  
PTRYRHY-KISLDISQLEALNISSTKTFITVNI VLLSQYLSRVSLFIRRSLSYDM----  
PPEVVYLVNAII-----DSAKRITESI-----TDFNIDTYINDLVEA--EHIKQ-----  
KSQLTINEFKYE----MLHNFL-PHMNYTP--  
DQLKGFYMISLLRKFLYCIYHTSRYPDRDSMVCHRILTYG----KYFETLAHDE-LENYIGNIRND-----  
IMNNHKNRGTYAVNIHVL---TTPGLNHAFS-SLLSGKFK---KSDGSY-RTHPHY-----  
SWMQNISIPRSV---  
GFYPDQVKISKMFSVRKYHPSQYLYFCSSDVPERGPQVGLVLSQLSVLSSITN-----  
ILTSEYLDLEKKICEYIRSY-----YKDDISYFETGFPITIENA-----  
LVASLNPNMICDFVTFRRRKRMGFFGNLEVGITLVR-----  
DHMNEIRINIGAGRLVRPFLVDNGELMMDV--C-  
PELESRLDDMTFSDIQKEFPHVIEM-----VDIEQFTFSNVCE-----  
SVQKFRMMSKDERKQYDLCDFPAEFRDGYVAS--SLVGINHNSGP-----  
RAILGCAQAKQAISCLSSDIRNKIDNGIHLMYP-  
ERPIVLSKALETSKIAANCFGQHV TIALMSYKGINQEDGII IKKQFIQRGGL--  
DIVTAKKHQVEIPLNFNNKER---DRSNA---YSKLESNGLVRLNAFLES GDAMARNISSRTLED--  
DFARDNQISFDVSEKYTDMYKSRVERV-QVELTDKVKVRVLTMKE-  
RRPILGDKFTTRTSQKGTVA YVADETEL PYDENGITPDVIINSTSIFSRKTISMLIEVILTAAYS AKPYM  
NKGEM-RPVCFPSSNETSIDTYMQFAKQCYEHSNPK--LSDEELSDKIFCEKILYDPETDKP-----  
YASKVFFGPIYYLRLRHLTQ-  
DKATVRCRGKKTCLIRQANEGRKRGGGIKFGEMERDCIIA HGAANTITEVLKDSEEDYQDVYVCENCGDI  
AAQIKGINT-----  
CLRCSKLNLSPLLTIDTTHVSKVFLTQMNARGVVKLDFERRPPSFYKPLDKVDLKPSFLV-----  
>u1\_Yabdi12085099  
MKKNTVFEMDQIIGYKFLAP-DPKVGVFYRPLHFQYVS-----YSNFINHRLQEI----  
LSVKRTL--LSFKNDTE-----KIMIEIDNIKVTPPEYS-----  
PIIASIKGKSYDALVTFTVNIYKEVMTKDGTTITKISSYEGNDSHLIKIPLLI GYGKNPLDTAKYV----  
---VPNVIGGVFINKQSVEKIGINLVEKITT---WPKFRVI-KPN--AFTFSFSSVSPSYVL-----  
PTKYRHY-KIIMDISQLDNCSISSTKTFITVNI ILLVQYLSRVSLDFIKKSLSYDM----  
PSEIYLVNSLI-----ESTKELIKDI-----SDFNLDNYINDLVLS--EYTKQ-----  
KSQQLQYEEFKYE----MINNFL-PHMYDSP--  
NQLKGFYIILLRKFYIYCIYFTSRYPDRDSMVCHRVLTYG----KYFEILAHDE-LENYIGNIKTD-----  
IINNHKNRGTYSVNIHVL---TTPGFNHAFS-GLLSGKFK---KTDGSY-RTHPHY-----  
SWMQNISIPRSV---  
GYYPDQVKISKMFSVRKYHPSQYAYFCPSDVPERGPQVGLVLSQLSVLTSITN-----  
ICTNEYLELEKKIYSYIKSF-----NYEDISYFETGYYITLENS-----  
LVASLNPEKVYDFVNDFRKKRIGYFGNLEIGITLVQ-----

DHMNEIRINIGGGRLIRPFLVIDNGELVMDT--  
VIKDLEEKIEDFTFSDILKEFPHVEM-----VDIEQFTFSNVCE-----  
SVQKFKSLSKAERVKYHLCDPSEFRDGYVAS--SLVGINHNSGP-----  
RAILGCAQAKQAISSCLSDIRNKIDNGIHLIYP-  
ERPIVLSKALETSKIIVNCFGQHVIIALMSYKGINQEDGIIKKQFVERGGL--  
DIITAKKHQVEIPLFNFNKER---VKSTA---YSKLDNSGLVKLNAFLENGDAIARNISSKTLED--  
DFVNDNQISFDISERYTDMYKSRVERV-QVDLTDKVKVRVLTMKE-  
RRPILGDKFTSRTSQKGTVAFIADETDLPYDDEGIKPDIIINSTSIFSRKTLMLVEVILTAAYASKPYN  
NNEQN-RPICFPSSNETSIDTYLDFAKQCYECVYPN--LDKDEIDNKVFCEKILYDPETDVP-----  
YKSKVFMGPIYYLRLRHLTQ-  
DKATVRCRGKTKLIRQANEGRRRGGGIKFGEMERDCLIAHGAANTITEVLKDSEEDYQEVYVCENCGDI  
TSSVKGNKI-----  
CIRCSKQNLSTILTKVDTTHVSKVFITQMNARGVKVKMEFEKRDPMFYKPLESVDLTPNFLN-----  
>u1\_Myxvi9633750  
-----MDQRLGYKFLVP-DPKAGVFYRPLHFQYVS-----YSNFINHRLQEI-----  
LSVKRTL--LSFKNDTE-----KIVIEIDNIKITPPDYS-----  
PIIASIKGKSYDALVTFTVNIKFVMTKDGTVITKISSYEGNDSHLIKVPLLIYGYNKNPLDTAKYV---  
---VPNVIGGVFINKQSVEKVGINLVEKLT---WPKFRII-KPN--VFTFSFSSVSPHVL-----  
PTKYRHY-KILMDISQLENCISISSTKTFITVNIFFLLAQYLSRVSLNFIKQSLSDYM---  
PDEIIYLVNAVI-----ESTKHFVDSI---NEFDIDTYINDLFIE--EHTKQ-----  
KSQVSLDEFKHE---MLYNFL-PHMTNTP--  
NQLKGFYIISLLRKFYICYIYTSRYPDRDSMICHRLTYG----KYFEILAHDE-LENYIGNIKTD----  
IINNHNKRGTHSVNIHVL---TTPGFNHAFS-GLLSGKFK---KTDGSY-RTHPHY-----  
SWMQNISIPRSV---  
GFYPEQVKISKMFVSRKYHPSQYAYFCPSDVPERGNQVGMVSQLSVLTSVTN-----  
ICTNEYLDLKERKICEYVRSY-----DVKDISYFETGYVVTLENA-----  
LIASLNPDLTHAFVRDFRRKKREGYFNSLEIGITHVA-----  
DHMNEIRINISSGRLIRPFLVIESGELIMDT--V-  
PELADKLDDMTFSDVQREYPHVIEM-----VDIEQFTFSNVCE-----  
SVQKFRSLPKSEKVKYQLCDPSEFRDGYVAS--SLVGINHNSGP-----  
RAILGCAQAKQAISSCLSDIRNKIDNGIHLIYP-  
ERPIVLSKALETSKIIVNCFGQHVIIALMSYKGINQEDGIIIVKKQFIERGGL--  
DIITAKKHQVEIPLFNFNKER---VKSTA---YSKLESNGLVRLNAFLVLESGDAIARNISSRTLED--  
DFVQDNQISFDIADRYTDMYKSRVERV-QVDLTDKVVXRVLTMKE-  
RRPILGDKFTSRTSQKGTVAIADENELPYDENGKPDVIINSTSIFSRKTVSMLIEVILTAAYASKPYN  
NDGKN-RPICFPSSNETTIDTYLNFAKQCHTHTYPD--ASDEVINDKIFCDKTLYDPETDTP-----  
YTAKVFMGPIYYLRLRHLTQ-  
DKATVRCRGKTKLIRQANEGRRRXGGGIKFGEMERDCLIAHGAANTITEILKDSEEDYQDVYVCENCGDI  
TANIQGNKI-----  
CIRCSKQNLSTILTKVDTXHVSKVFITQMNARGVKVKMEFEKREPLFYKKLPPVTLTPTFL-----  
>u1\_Molco9629061  
MKNYRVHKMDQKLGFKFLEP-DPKKNVFYRPLHFQYES-----YANFILYRLREI-----  
LAVRRTL--LSFKNDTE-----RIVLEIDKIKVTPPEYS-----  
PIIASIKGKGYDALVTFTINIYKEVMTKEGVTLTKISSYEGNDSQLIKIPLLIAYGNKNPLDPAKFV---  
---SPNIIGGVFINKQSIEKVGINIVEKITT---WPKFKVV-KPN--AFTFSFSSVSPVNL-----  
PTKYRHY-KITDLAQLHECTISSKTFITVNVLLLQFLANVGLDFIRNSLAYDM---  
PPEAVYLVNALV-----ESTRRLAAAE-----DDFDVAEYVAELIEA--EHAQK-----  
RSPAKLEDFRYD---MLQNFL-PHMLHSG--  
NQLKGLYLLSLLRKFVCTFFPSRYPDRDSMICHRIITYG----KYFETLANDE-LENYINNIKTD----  
LFNNHNKRGTCVNIHVL---TTPGFNHAFS-GLLSGKFK---KTDGSY-RTHPHY-----

SWMQNISIPRSV---  
GYYPDQVKISKMFSVRKYHPSQYVYFCPSDVPERGPQVGLVLSVLSYVTN-----  
IRTDEYLALQIREYVYSY-----PQVNISFFETGFPLTIENA-----  
LVAVLNPHLVDDFVADFKTRKRLNFFENMELGITLVK-----  
DHMNEVRVNIQSGRLVRPFLVVHQVLMVDT--  
VGAELDARMETMTFSDIQREYPHVLEL-----VDVEQFTFSNVCE-----  
SAARFRALPEAERRLYDYVDFPAEFRDGYVAS--TLVGVNHNSGP-----  
RAILGCAQAKQAISSDLRNKIDNGIHLFP-  
ERPIVLSKAVETSKIAVNCFQHVLIALMSYKGINQEDGIIKREFVQRGGL--  
DIVTAKKHQVEIPLNFNCKER---VKSTA---YSKLDNGLVKNLAFLEPGDAVARNISSRTLED--  
EFVDDNQISFDIAERYTDMYPSRVERV-QVDLTDKVKVRVLTIKE-  
RRPVLGDKFTSRTSQKGTVAYLADAEALPYDDDGLTPDIIVNSTSIYSRKTISMLVEIMLTAAYAAPY  
NQDN-RPICFPSSNETSIETYLAFAKCYESVFPE--LRETELQARLFCEKTLDPETDEP-----  
YAAAVFMGPIYYLRLRHLTQ-  
DKATVRCRGKTKLIRQANEGRKRGGGIKFGEMERDCLIAHGAANTITEILKDSEEDSQDVHVCEHCGDI  
ATRKNVLF-----  
CIRCTKLNLSVLTTRVDTTHVSKVFLTQMNARGVKVRLEFEKQEPLFYSPLKPVDLRPRVLG-----  
>u1\_Squvi549059722  
-----MDQRLGYKFLGP-DPKAGVFYRPLHFQYES-----YTNFILYRLKEI----  
LSVRRTL--LSFKNDTE-----RIILEIDDIRVTAPEYS-----  
PIIASIKGKSYDALVTFTVNIYREVMSKTGTTTTKISSYEGNDSHLIKIPLLIAYGNKNPLDPAKFV---  
---VNVIGGVFINKQSIEKIGINLVEKITT---WPKFRVV-KPN--SFTFSFSSVSPANVL-----  
PTKYRHY-KISLDIAQLSGCVISSAKTFITVNVVLLIQYLANLSFDFIRNSLTIDM---  
PAEAAYLVNAIV-----DSAPAAYAKQND--NDADTYSYVHELIEA--EHAKQ-----  
RSTMTLDEFHYD----LMHNFL-PHMQDSP--  
NQLKGLYLLSLLRKFIFCIFSRYPDRDSMACHRVLTYG----SYFETLANDE-LENYISNIRTD-----  
IMNHNKNRGTCAVNIHVL---TTPGFNHAFS-GLLSGKFK---KTDGSY-RTHPHY-----  
SWMQNISIPRSV---  
GYYPDQVKISKMFSVRKYHPSQYAYFCPSDVPERGPQVGLVLSVLTAITN-----  
IRVTDYVELNRRICEYVRSY-----PRDDISYFETGFAVTVENA-----  
LIASLNPAIVDEFVRDFRRRKRVGFFGNLEVGITLVR-----  
DHMNEVRINIGGGRLIRPFLVVEDGELVMDV--  
VNADLEASIDSMTFSDIQREFPHMEM-----VDVEQFTFSNVCE-----  
SARRFRTLPEERRRYDLCDFPTEFRDGYVAS--SLVGINHNSGP-----  
RAILGCAQAKQAISSDIRNKIDNGIHLVYP-  
ERPIVLSKALETSKIAVNCFGHHVMIALMSYRGINQEDGIIKRFVVERGGL--  
DIITAKKHQVEIPLNFNCKER---VKSTA---YSKLDNGLVRLNLFESGDAIARNISSRTLED--  
DFVVDNQISFDISERYTDMYKSRVERV-QVDLTDKVKVRVLTMKE-  
RRPVLGDKFTSRTSQKGTVAYIADESEMPYTEDGTRPDVIINSTSIFSRKTLMLVEVILTSAYAAPY  
NQGEN-RPVCFPSSNETGLDVYLDFAKCHGHEHPE--ASEEEIEDRVYCERTLDPETDEP-----  
YEAKVFFGPLYLRLRHLTQ-  
DKATVRCRGKTKLIRQANEGRKRGGGIKFGEMERDCIIAHGAANTITEILKDSEEDAQDVYVCENCGDI  
ATQTGSTRT-----  
CLRCAKLNLSVLTIKIDTTHVSKVFLTQINARGVKVKMEFEHRNPVFKAMPVDLRDPAMPWNPESEN

-----  
-----  
NCVOG0274, DNA-directed RNA polymerase subunit alpha  
-----  
-----

>ASFV\_9628206  
MEAGYAEIAAVQFNIAGDNDHKRQGVMEVTISNLFEGTLPAEGGIYDARMGTTDHHYKCITCSHQKQC-  
MGHPGILQMHPVL-QPLFIAEIRRWLRI--CLNCG-----APIVDLKRYEHL-----  
IRPKRLIEAASS-----QTEGKQCY--VCKAVHPKIVKD-SEDYFTFWVDQ-----  
QGKIDKLYP-----  
QIIREIFSRVYDVTVVKLGRSKNSHPEKLVKAIQIPPIISIRPGIRLGIGSGPQSFHDINNVIQYLVRKN  
LLIPKDLQIVRGQKIPLNIDRNLQTIQQLYNNFLLDVSTTATQGG--  
TGKRGIVMGARPAPSIMRRLPRKEGRIRKSLLSQVWSISRSTICGNSDLHLDEVGYPISFARTLQVAET  
VQHYNINRLMPYFLNGK---RQYPGCSRUYKQIT----  
QSVHDI EGLKQDFRLEVGDI LYRDVVTGDVAFFNRQPSLERSSIGVHRIVVLENPKISTFQMNVSACAWY  
NADFDGDQMNLLWVPWSVMSRVEAELLCSVRNWFISTKSSGPVNGVQDSTVGSFLLTRTNTPMGKNVMNK  
LHAMGLFQTTQDPPCFANYSPTDLLDGKSVVSMMLKQT--  
PINYQRAPTWYSEVYAPYMHYNKQDISTQIRNGELIEGVLDKKAAGGSSGGIYHLISRRYGPQALKMI  
FATQQLALNYVRNAGFTVSTADMLLTPEAHQEVQEIINKLLESEEINNRL-----  
HGDIMPPIGLTTDFYKQLNALKFPDRILKPIMNISI--  
NPETNGLFQMVATGAKGSNPNMIHIMAGIGQIEINTQRIQPQFSFGRTL VYYPRFALEAQAYGFICNSYI  
AGLTSPEFIFGE-  
MNGRFDLINKALSTSSTGYANRKAIFGLQSCIVDYRRVSI DTRLVQQLYGEDGLDARQLETVRFETIML  
SDQELEDKFKYTG IQSPLFEFFSRLLKDRDKYRQIFLNVENFNFSQLLTDVRQVPVNVASIVKNILLSS  
TSGVLPFDEKSI LQKYAMVKTFCNLPYVFINNIQERLQTPIPVYLKRAAALMRMLIRIELATVKTLL--  
NITCEQMSAILDLIRLQYTQSLINYGEAVGILAAQSVSEPLTQYMLDSHHRVAGGTNKSGIVRPQEIFS  
AKPVEAEQSSEM LRLKNPEVETNKTYAQEIANSIELITFERLILQWHLLYETYSSTKKNVMYPDFASDV  
EWMTDFLENHPLLQPPEDIANWCIRLELNKTTMILKSISLESIINSLRAKHPNTYIMHSVENTASGIPII  
IRIYLRESAFRRSTNTRMATDEKIAVNVVVKLLNSTI-  
RGIPGIKNANVVKLMRHRVDAQGKLVRLDNIYA IKTNGTNI FGAMLDDNIDPYTIVSSSIGDTMELYGIE  
AARQKI ISEIRTVMGDKGPNHRHLLMYADLMTRTGQVTSLEKAGLNAREPSNVLLRMALSSPVQLTDA  
VDSAVNPIYGIAAPTLMGVPRIGTMYSDIIMD-----EKYITENYKSVDSMI-DML  
>u2\_Me1sa9631519  
---MAKVNTEILFSMIPNSIIDSIPIIINSISNDAD-----NNVKSTKLGGTGFNV-  
CSTCRLTKDNGDLGHPGRTP LKKMAIKPAFIKSVLDTLNALKICSNCKMFRDNEAL-YKILK--  
KYNIDVQDNKIDPTELKKEILTLIKLNKQSASKCNNINCQLPIATYKYNTIKAQFYIKVIK-----  
---DKVISNEQIYKMLIGIPHIVYKCIKSPLSIGNFTPYEAFYTNNILIMVNPAPPPNHY--DN--  
KDSHIMTTKLNQLVGS-----  
IIKEKEIEDIQKIYNDIDHVKPKSPYSRGTLFDTLNTEVAGN-----  
KKEGILRSYILARRSDNTGRGVAGPIIA-KIGYLG IPEIVASTLTESIYYNRFTEQKVRDLIYNSPD-  
VKFI--  
VLYNYEALKPATILEVRPEAKINLLKIKYGDRIEIP LQNYSMILFSRQPSLHKFNIQCAFCLIHKA---  
QTFSTPTAIANSMNLDYDGDDELNIYKPKSPSS-  
IEACFLMLSSAILKNNYNFSPAFLIQDQLIAIHMLYNIKEISLNDAIYILGEYSY---FIRD-  
INKKSYT-----GVELLSLIFPH---NITYNNV-----  
IQNGKLILPMIDSRYLVSQSYNALANLMSQLKNNVFGVHLIDILLYIARNVIKLYGFSVSLHDVIPKLN  
IEDMYKFVNCCKIAHYKLLKYNSNQLNNNNILLS----  
YDELENIRIDNSKIIINEVIKRIGNVFKDDYLN SIITMKNTRYKINDNELATIIGCTGQQGLDSNEIPKP  
SVMGRIFDFNVPGNIDMESLGF IKSSTLKGLSFAEMCAHAKYNSIKKILKITCETSSAGSTGRKLVKFME  
GIKIDHYNRAVLNNYVIW--QNPNYRMIGGDM SRIN-ILLPNNKMHN-----  
YNEIMEIYNIKIYLV----GESFTSITKETVFPINIQAIEIQSYIIDNDNSQ-  
ELSNDELINIINEYVEKVKVESFFYTQKMD-----IFKYV-----  
LMTYLDRYTVESYNKCLTSLLSYIFDKINIKLLCSM-  
SPGYAIGFEYAHTIQEKFTQQALSAFHT-----SKKSGAVAIQLGFTE-----  
FKDTELVELSKKNKPDIVIANSLHYKLEI IKMQLEF-----

VCLKYFDPVITILKEINKDNPYLD-----INVRINKNYIN-NKISIQYINMY-----  
NNFLNNCNIISSY--WITQ--  
NFNDPYIDVIIIGVKFKEPTEINSLYFIESLPGAVGKGNFNNKLNKI-----  
VPIKMYDFDLNEQDGYSLQFYINSITELSRFDTRDVY--IRMNQWFAYELFGIQYAEYVIRNRL---  
VESTNE--  
RSMEICYNLLAKLMCETADMVSIKKLRDGKNSIIKHAIHGNDQDAIVNAAYNNILDPAKDSYSSLFLNKQP  
ELGASYYPYLNLRNRY----DSIKIELKEEEVNIKSPIIEDF  
>u2\_Anocu578887716  
-----MDYVNYKYSIISNEIIDAIPIIINSISNDSE-----NNVKSTKLGGTKFNV-  
CSTCTLTKEGDMGHLGKTPKNIIMIIRPAFIKLIINFLNTIKICNNCKMIRNNIDI-SNVLN--  
KYNKY-----  
YSPQLRREIQLLIKTNKQGNLRCNNPNCGKTIGSYKYNYSKSQFFIRKTETDDRDKSKKSIDEPISNTQI  
YNLLKGIPDIIYNCLTANTSESILTPYEVFFKNNIPIMVLPARPPNY--DN--  
KESHVMTTKLGQLVGS-----  
IIKFNTEDIQKIYNDIDHVKPKSPYKGNLLVTLNIQVSGN-----  
KKESIPRSNILARRSDNTGRCVAGPSME-  
KIGYINIPSLMAKTLTTSIYYNRFTENKIKNLILNNTKVKYI--  
LLYNYNQLKPTLLKIKPDTKINLMMKMYGDRIEVELSDYDIILFSRQPSLHKFNIQAALCKIWN---  
NTVGIPTPIANSMNLDGDEVNEYKTQSPGN-  
IEALFTMLSVNLVKNNYNLSPIFGLIQDQIIGLHLLYKKEEYDINEVIYILGEYSY---FIRD-  
INKLKYS-----GSELLSIFPD---NISYEGV-----  
FDNGELIINNISRFRVVSQSYSLSNLMSHYKNNVFAVQIIDTLLYIVRNFISLYGYSISLLDIIPDIKF  
INYIYNYIEDCKKVIQYVMGKYNSIS--NNHDILLT-----  
YDELENIRINNCTNIINNVOQKIIELFKDNPLNAIVAANKSEYKITLDELVTVLGCTGQQGIDSNDIPKP  
GIMGRVFNSILPSSLDIESLGFIKSSTLKGLTFKELGFHTKYNSIKKILRITCETSSAGSTGRKLVKFME  
GVKIDHYGRAVLHNTVVW--QNANYLKMLGSDIVRVN-ILEPDDNMEN-----  
YNIKKLYDDNKYLL----SDNFTRINKEFLFPINIKLEIQSY--KSKIIN-  
DLSAKDLSNKIEKFINYIHLNIYFYLIDL-----WFKYI-----  
LYTYLDKFTIKRFKNIYSAELIDYILDKIKLKLNSL-  
SPGYTIGLEYAHNIQEKFQQSLSSFHT-----TKKSGTAATQLGFND-----  
FKDTVLSRKNKPDIVTAYSTNRNKLEIIKINVEY-----  
LSIKFFNPDISIEENTKNSGLV-----ISIKINKFYVN-KKLTLMQYYQMF-----  
LDFLDNCIINSY--WSKM--  
KLYKDIIDIIIGITIVAPYNINKIYFMQGISSAVYKGMANTNIDI-----  
ENIKMYDDNMVQVDGYRLRFYIENVYDLSNFDTRDVY--LELGPWFAYDAFGIQFAEYSICNRL---  
INSTKE--  
KSMEICYKILSKLMCLSTDMYNIKRLRDGKNSILKNAIHGVSDSIQNSAFNNIIDTGTDIYSQIFENSL  
NIGHGYYESYLNLNKY----DSISLIKKEILEKNIESEIENF  
>u2\_Mytse506497962  
-----MTTFKYTLLDNNIIDSIPVIDSIGNDNE-----NSVKSPKLGGTKFNV-  
CSTCNLTRENGDMGHPGRTPLKDICIVKPGCIKNIIDTLNLTCLKCNCNCFMLKNNTLF--TTILE--  
KYNYE-----  
FSINLKREILNLLKNNKQGGIKCSNINCQNITGTYKYNTKKAYFYVKKQK-----  
DEIISNKSIIYTMLNGIPDIIYKCVTPSYSDSQLQPSKAFYVNNILIPVLPSPRPPNYF--DN--  
KESHVMTTKLGQLVGT-----  
SQKSKDESEVQKIYNDIDNVKPNSPYKTSNMLVTLNIQVGGN-----  
KKGSIVRSNIMARRSDNTARCVAGPTMD-  
KIGYIYIPKSAQTLTSSIIYYNRFTENIIRDLLINDNSKIKYI--  
LLYRFDQLKPTLLKIKPQSRINLLKMRYGDRIEVELDDNDIILFSRQPSLHKFNIQAGICKIWEN---  
NTIATPTPIANSMNLDYDGDENIYKPKSSMA-

IEPIFTMLSVNMVKNYFSPVFGLIQDQIISVHMIYNIKEFSLQEVIYILGEYSY---YIRD-  
INKKTYS-----GKELLSLLFPD---NLTYENM-----  
FKNGEIIQLNISSKQVVAQSYDSFSNILSHLKNNIYAVYFIDVILYVARNFINLYSFSVSLKDILPNIYF  
VDEIQEYVNNCCKVIQYMASKYY--TK-KDHIMKLT-----  
YDEMENIRIQNGNNIINNPKINDLKFNEKLNAIMLMKNSGYKITLDELVTVLGCTGQQGIDSDDIPKP  
GIMGRVFDSTLPSSLDIESLGFVKSSTLKGLSFKELAFHMKFNASKKILKITCETSSAGSIGRKLVKFME  
GVKVDHLGRSVLNNDIIW--YNTNHIKMGVGGDISKIE-ILKPSLEMVN-----  
YSIINKLYNDNKKYLL----NCFGTEINKEFIFPVNIKLELQSF--YSKINT-  
PISETEALKIIDEFIEYVYVNIYFYNDMT-----WFKYT-----  
LYTYMDRSTIEKYNKIYSKEIINYVINKIKLKLNSL-  
NPGYPIGLEYANNIQEKFTQQSLSSFHT-----TKKSGTASTQLGFSD-----  
FKDVELSKKNRDIIVTAYSIIHKYKLEDIKKQIEY-----LSLKNLNPTINILEES--  
EDEMVE-----ISVSIKYYIN-DKISLYHYLQMY-----IEYLENNKIIKGF--WIIM--  
KLNNNNINIVIFGVKIKIPYSINKIFMIKSIPVSVSKGKMSNINLEI-----  
EDVIIYNDNLEEQNGYTLKFYIDSVSDFINFDTKDIH--MELGPWFTYNAFGIQFAEYSIRRRLL---  
VSSTKE--  
KSMEICYIILSKLMCLSEMNIKRIREGKQNVIKTAIHGSSDAITTAAYNNVIDPNNDIYSQILSNEII  
KLGHGYYDCYLNLNRY----DSINVNSVTEQDINIKSKIIENF  
>u2\_Amsmo9964535  
-----MTTFKYTLLDNSTIDAIPVIDSIGNDNE-----NSVKSPKLGGTGFNV-  
CSTCNLTRENGDMGHPGRTPLRDMCIVKSGCIKNVLDLNTLKLKNSCFMIKNNTIF-SEIE--  
KYNSE-----  
YNINLKKEILSLLKNNRQGGVKCNNENCQITGTYKYNQKSYFYVKKQK-----  
DEIILNKTVYTMLLGIPDIIYKCVTPYADSQLQPYKAFYANNIIPVLPSPRPNYF--DN--  
KESHVMTTKLQVLGT-----  
SQKSRDESEVQKIYNDIDNVKPNSPYKTSNMLVTLNIQVGGN-----  
KKGSIIVRSNIMARRADNTARCVAGPTMD-  
KIGYIYIPKIVAKTLTSSIIYNRFTENMIKMDLVNDNNKIKYI--  
LLYRYDQLKPTLLKIKPQSRLNLLKMKYGDRIEVELEDNDVILFSRQPSLHKFNIOAGICKIWDN---  
NTIATPTPIANSMNLDYDGDENNVYKLKSSVS-  
VESLFTMLSVNMIKNYFSPVFGLIQDQIISVHMIYNIKEFSLQDVIYILGEYSY---YIRD-  
INKKTYS-----GKELLSLLFPD---NLTYEGM-----  
FDNGKITLSNISSKQVVAQSYESFSNILSQLKNNIYAVYFIDVILYVARNFINLYSFSVSLKDIIIPDIYF  
IDDVQYEVNNCCKVIQYVALQYY--IK-KDHIKLT-----  
YDEMENIRIQNGNNIISNVKNKINLKFDEKLNITMMKNSGYKITLDELVTVLGCTGQQGIDSDDIPKP  
GIMGRVFDSTLPSSLDIESLGYVKSSTIKGLKFEELAFHTKYSIKKILKITCETSSAGSIGRKLVKFME  
GVKVDHLGRSVLNNDIIW--YNTNHIKMTGGDISKVE-ILTPSLEMVN-----  
YTLIKEIYNENKKYLL----TNFNTEINKEFIFPINIKLEIQSF--YNNKST-  
PISDIDALKLIDFIEYVYINIYFYNTID-----WFKYI-----  
LYTYLDRNTVEKYNNKYSKELLNYIINKIKLKLNSL-  
NPGYPIGLEYANNIQEKFTQQSLSSFHT-----TKKSGTASTQLGFSD-----  
FKDVELSKKNRDIIVIAFTTHRYKLEDIKKQMEY-----LCLKNFPKINIIET--  
ESDMV-----ISVSIKYYIN-DKISLYHYLQMY-----IEYLENNKIIKGY--WITM--  
KLKDNIDITVIFGVKIKTPYNINKIYMIKSIPVSVSKGKISNINLEI-----  
EDVKMYNNNLEEQNGYRLKFYIDSVTDFINFDRDVY--LELGPWFTYNSFGIQFAEYSIRRRLL---  
VSSTKE--  
KSMEICYIILSKLMCLSEMNIKRIREGKQNVIKSAIHGSSDAITTAAYNNIIDPNNDIYSQILSSQIM  
KLGHGYYDCYLNLNRY----DSININSVTEQDINITSEIENF  
>SGPV165  
----MRPITSIEFLYTNDEIERSEISIKNSKSAND-----HETVKDKRLGTVDNNL-CKTCRCISTLC-

LGHWGKVGIKNVYI-RPSHVNQIIQISNYL--CLHCGVFKLKSAYETSTKI--  
ALKHHDDKNNKIKIKELAKSILD-----KKSIGCWNESQKQYVKISFNKKKKICFTWWSK-----  
ENKLTVEQEYPLQKLFEMFKSIPALYY-----  
PMIGVKVSPENLFYEKNIPIPPMLIRPPNSFWLDDVKKETHEL TILMTTLINQ-----  
IKSNSDSMIIQKALIEYDNSNILSAVKQNN--NSLVSILVG-----  
KNNMLRWHILSGRKDQTCRTVVGPDSQLLLWEIGVPMVLSKLSKIFVNPFSIEKIVNLFRAQ--  
VKIY--FNKQTNRL-----  
MTLKKDKKLGQVTFKPGDWVEIDLQEGDHMIFGRQPSLHRHNVISSCIKRVG---  
CGLKIPQVICNSQNAFDGDEIWGCLEQHPKATIEQSILMFPVTIILHDLLGIPLYGNIQDEIISAHLLG  
TETELTLTEVNYLQKCPHLRQLALP-KGQKYFT-----  
GKNVLSIVFNQKKNLTLPGI-----  
LKDQIIIDNIGSDLIVGQKTKSLSLKLIETSSRLEGCKFINDIGRLLRQYLRFRQYGVIFTDLLPDYAY  
VRTLNNNNLDKLFKIKSNFARYIRDCE-  
DGKIIIRLDEQ TENKYIDTVLMSLVKSNICSITKFIETQLEINPRNSLYVMSKAGYKMNPTEMMYIFGTFG  
QQKIGGKKM-STGVNSRILPYHLPGLDPECRGFVNLPLLVLGTGIEYYFTM-  
ATARSQIVDIVCETSRTGSLARKILKMKMEDVVVNELGYVICNKNILK--FACNDIKMSKQDTTKIP-  
IITPKPSQKW-----YSEIKHIWNTLAPYLT----  
TDNKRNKITQCSFMLNLDMFLQTN--KSRVGK-  
PVESNTLQKQVNEWVDMITQKYFFNLSDTT-----MIRYT-----MLTYLDPSRY-----  
PIDSVVNLNDFENIENRFIYSL-SSGYPVGVIFAQTLSEKFTQQALS NFHT-----  
TAKSGGVAATLGFDK-----  
FLKLVSLTKNTKAEVITFTSKTKAPLEILQNNFQF-----VCLDQLCPVIKTRVE---  
NTKMY-----IEMTFDRKHLKSENIQIPQLEIMI-----ETFFNKIQITGQWSYWTEI---  
LDKRKFIIRIITELEEPVSVNQYILPMMLPGGIYKGIKIDVKFPIDKIQWEYSEEHDEHKQVDAYKLIM  
ILDSTAMLT KFDLSGID--VNPGIWTSYFGFGIESVRNKLINEM---  
LETYGNQFDYLYQCCNLLADVMCHYYPETANNFKMTKISIMKKMASGDYKSAQA AVSGAVD VVQDNST  
CHFLCQPIKVGTFDFDYTDINDFLPL---VAKKSTIEDIKETTLDL-IGF  
>u1\_Nilcr115531763  
----MKPISGVRYSLSQNEINSTNILIQYIKNEGD-----YGTTKDNRLGAMDGYI-CKTCNSTELEC-  
FGHWGKVRIYDNVVIKPEYINEVRLKYI--CLRCGFLRSRDPYSLDNLE--SLPGY-----  
KIQELSNKILS-----KKSVCWNTQCMQPYLKMFS-KKKVCLVVKQE-----  
ELAIPNICVYQKLT SIHKRFW-----  
PLLGLHQNPANLFYKEYFPVPLIIRPAISFWVDSIPKETNEITYMLNTIVKY-----  
CIQNAEEYTIQKAVIEYDNNKIL-VTNTSN--INLSYITSG-----  
KNNMIRSIVARRKQDARSVLGPDSLSVAE VGI PDYVRQTLTEKIFVNAFTIDRVRELKANK--  
IKFY--FNKSLRQL-----  
TSLKKNKFIKNIHLLPGDWVEIDLQEFNSNIIIFGRQPSLHRYNVISSIRATAE---  
NTIKISPGIANSQNAFDGDEEWMIVEQNPKSVIEQSVLMFPPTLLKHDVSGLPVYGSIQDEILAAYILF  
QMKDVSAAAVLNLGRYGH--EFPAD---RARYS-----GREIFRFLIGY---  
DITYPGI-----  
LERGSISTENIDSNFIVAMKHL SLSGLVSDYASNLEGVRFIDKMSYVLKRFLTIYGF SVTFRNLCADLDF  
VDELYRANVTKLNAIKRAYAEYLDVA-  
AGTVIPLSEFAEAEALDGMLINL TNHNVAIDDYMKRVLRSDPDNLLRMSCVGYKMNPTELMYILGTYG  
QQKVDGKHI-ETRVLGRVLPYYLPDSRDPEGLGYILNSLIKGLTGPQYYFTM-  
LIARSQSIDIVCETSRTGTLARKI IKKLEDVMVDGYQIVYYDYLVK--YAANYTKTAGSVCKPVE-  
LLVPSESMW-----YLEILDWNLKLGHI-----  
YNQGQKLARYLIFPFNFVKVFKPA--TEKET--  
PLPGDRLYGMIEEFVEDIRLNDFFLLTDVD-----YIKYA-----MLTHLNPSRV-----  
RITQETFDLVIA RFREKLRYSL-GGGFPIGIIYAQVLEKFTQQALSSFHT-----  
TEKSGGIKKLGFNE-----FNNLTSLSK-





NGSIIPLSRADMEAVDSILSGLTNFNIEIEKYMKEVVAKDPENSLIKMSCAGYKVNPTELMYILGTYG  
QQRIDGEPI-DTRILGRVLPYFLPDSKDPEGKGYILNSLIQGLTGSQYYYAM-  
LIARSQSTDIVCETSRTGTLARKI IKK MEDMVVDGYQVVYNNLTVK--YAANYTKIQGSVCKSVE-  
LIYPDES L TW-----FLEISALWDKLNKNGFI-----  
YNQGGKISKYILAPFNFKVFIKSD--EKK-----  
PMKPKDLYDKIQIVIKDIRENYFFDISNID-----FIEYV-----FLTHLNPSRV-----  
KVS EDTLNTIFDKLYEKLNYSL-GGGLPIGIISAQVLSEKFTQQALSSFHT-----  
TEKSGGIKRKLG FNE-----FNQLTNLSK-  
NKSEIITLISDDITKLQTIKMNFEF-----VYLGELNPEITIKE----DKDYR-----  
IDIDINRLYIKRNQTELIVEYML-----EKFVSYSVLVKNWGMETSI----  
VNEYVIRFSLFIVFTEPLGINKNKFMMVLPGAANKGKVS KYKIPI-----  
SKYKTYIDHDRTKESYRLTVELMGLKELGTFDLINVN--VIPGVWNTYEIFGIESVKS YLCEAL----  
LNTYGEGLDYL YQPCDLLASL ICLN YEPESINKFKFGPVSALKRATFGDNKALLNAALYKKT E P VNDNSS  
CHFFSKVPKIGTGYKYFMDIEKFLRFKKKISEKLTEKKIADIGESV-QDF  
>u1\_Molco9629011  
----MAVIARVSYSLYTQNEINANDILINHVKND DD-----VGTVKDSRLGAMDGVL-CRTCGRTELEC-  
FGHWGKVRLYETHIVKPEYIHEVIRIFNHI--CSRCGLLR SREPYTVPELG--TL SAH-----  
ALKKLDKISS-----KKKSCWNNKCMQPYQKIAFS-KKKVCFVNKID-----  
DVAIPNALLYQKITSIHR SFW-----  
PLLEIFQDPANLFYKGYFPIPLIIRPAISFWIDSIPKETNELTYLLGMIVKY-----  
SNMNAEEQVLQAVIEYDNIKIIVNNTSS--INLSYITSG-----  
KNNMIRSVMARRKDTARSVLGPPELSITEVGIPDYVRNTLTEKVFVNAFTVPAVEELFRNE--  
VKFY--FNKRLGQL-----  
TRIKPNKFVKNKIHL LPGDWVETRVREFTSII FGRQPSLHKY NVISSVRATSG---  
DTIKIPPGIANSQNADFDGDEEWMILEQNPKSVLEQSILMYPATLLKHDVHGMPVYGAIQDEILAAYALF  
RQRDL SLAAVRN ILGKYGA--GFAGA--PGARFS-----GRDIFRFLVGQ---  
DIYYPGI-----  
LEAGEIVAEDIDSSFVAMKHRSLAGLIADYRSSLEGIAFIDRSSYVFKRYLR IYGF SVTFRNLCPDFRF  
VNRLHALNVEKINLVKAA YRQYLADVA-  
SGAVLPLSPGDEAEAVDAMLSGLTNMNVREIEAYMRRTLREDPDNSLLR MSCAGYKVNPTELMYILGTYG  
QQRVDGEAV-EPRVLGRVLPYFPPDSRDPEGRGYILNSLMQGLTGSQYYFAM-  
LIARSQSTDIVCETSRTGTLARKI IKK MEDMVVNGYQVVY GSTLIK--YAANYAKVLG SVCKPVE-  
LIYPHEGLEW-----FLEISAIWERIKHGFI-----  
YSQRQKLARVILAPFNQVFVRPA--APRD---  
AMPSKALYDLIQAVVEDVRENYFFGVSDID-----FIEYV-----FLTHLNPARV-----  
RISRATATLIFAKLYEKLNYTL-GGGLPIGIISAQVLSEKFTQQALSSFHT-----  
TEKSGGVKRKLG FNE-----FNMLTNLSK-  
NKTEIVTLISDDARRLQTVKINFEF-----VCLGELMPRISVRRAE--GAAHHT-----  
IDILVNRLYVKRHALTELVEHMI-----EKFVAFSVLVKDWGLETTV---  
EDAYNIRFTVLASFVEPQELNKNKFM LMLPGAANKGKISKYKIPI-----  
SEYQAYDDFHSTRRMFRMTVELMSLKE LGIFNLLGVN--VIPGIWNTYEIFGIEAAKSFLCEAL----  
LGTYGEGLDYL YQPCDLLASLLCMNYEPESINKFKFGAASALKRATFGDNKALINAALHKRTEPVADNSS  
CHFFSKVPRIGTGYRYFVNLELLLRMEKTLTEQVVEKKVEDIATHV-EDF  
>u1\_Squvi549059672  
----MAVIARVSYSLYTQNEINATDVLINHVKND DD-----IGTVKDSRLGAIDGAL-CRTCGRTELEC-  
FGHWGKVRLYETHVVKPEYIGE VIRIMNHI--CARCGLLR SREPYAVEDLG--SMSLH-----  
ALRRLKDRVFS-----KKKSCWNSKCMQPYQKIAFS-KKKVCFVNKSD-----  
EGCVPNALLYQKLTGIHRRFW-----  
PLLEIHQDPANLFFKGFPPVPPV IIRPAISFWIDSVPKETNELTYLLGMIVKY-----  
CNMNAEEHVIQAVIEYDDIRII-SNNTTS--INLSYITSG-----

KNNMIRSYYVARRKQDQTARSVIGPDTSLTINEVGPDYVRNTLTEKVFVNAFSAREVRELFARNE--  
IKFY--FNKRLGQL-----  
TRIRPGKFIKNKIHLPGDWVEVAVRERSSIIIFGRQPSLHRYNVIASSIRATPG---  
ETIKIPPGIANSQNAFDGDEEWLVLEQNPKSVIEQSILMYPTTIFKHVDVHGAPVYGAIQDEIVA AFTLF  
HTTGLTADAVLNILGKYGR--DFVPD--GRATYT-----GRDIYRYLIGE---  
RVNFPGV-----  
LRDGEIISENVDSNYVAMRHMSLAGLISDFTSNVEGVDFINRSSYVFKRFLQIYGFVTFRDLRPNSEF  
TDRLHALNIEKIELIKEAYRRYLDDVR-  
DGKVLPMASAAEADAVDTMLSNLTNLNREIEEYMRQELRVRPNNLLRMAKAGYKVNPTELMYILGTYG  
QQRVDGDP-ETRVLGRVLPYYLPDSRDPEGRGYIINSLTQGLTGSQYYFAM-  
LVARSQSTDIVCETSRTGTLARKI IKKMEDVVVDGYGQIVYNNVLLK--YAANYTKIAGSVCKPVE-  
LIFPDESMTW-----YLEISALWEKIRHGFV----  
YAQRQKLARKTLAPFNFLVFVEPS--PESE---  
ALSPKELYGIIKNVMDVDRDKYFFGIANVD-----FMEYV-----FLTHLNPSRI-----  
RLSRATVVRVFEKLYEKLNFTL-GGGTPIGVISAQVLSEKFTQALSSFHT-----  
TEKSGAVKHLGFNE-----FNNLANLSK-  
NRAEIIITLISEDPEKLRTVKVNFEEF-----VCLGELRPEIAVHD----RGDHYE-----  
VTIAVNRLYIKRAELTELVEHMI-----ERFVSFVSVLVREWGMETSI---  
LDEHTVQYSVLLRFVEPAALNMNQFMMVLPGAANKGKISKFKIPI-----  
AEFRGHDDFDRTRKHLKHITVELTNLKELGVDLENVN--VIPGVWNTFDVFGIEAARGYLCEAL---  
LSTYGEFGDYLYQPCDLLSTLLCSSYEPESVNFKFWVSALKRATFGDNKALLNAALHNRTEPVNDNSS  
CHFFSKVPRVGTGYRYFVNLDLLLRMERKLAAQMAERKVEELVTHA-EDF  
>u1\_Vacvi66275895  
----MAVISKVTYSLYDQKEINATDIIISHVKNDDD-----IGTVKDGRLGAMDGAL-CKTCGKTELEC-  
FGHWGKVSIIYKTHIVKPEFISEIIRLLNHI--CIHCGLLRREPY-SDDINLKELSGH-----  
ALRRLKDKILS-----KKKSCWNSECMQPYQKITFS-KKKVCFVNKLD-----  
DINVPNSLIYQKLISIEHEKFW-----  
PLLEIHQYPANLFYTDYFPIPLIIRPAISFWIDSIPKETNELTYLLGMIVKN-----  
CNLNADEQVIQAVIEYDDIKII-SNNTSS--INLSYITSG-----  
KNNMIRSYYVARRKQDQTARSVIGPSTSTITVNEVGMPAYIRNTLTEKIFVNAFTVDKVKQLLASNQ--  
VKFY--FNKRLNQL-----  
TRIRQGKFIKNKIHLPGDWVEVAVQEYTSIIIFGRQPSLHRYNVIASSIRATEG---  
DTIKISPPIANSQNAFDGDEEWMILEQNPKAVIEQSILMYPTTLLKHDIHGAPVYGSIQDEIVAAYSIF  
RIQDLCLDEVLNILGKYGR--EFDPK--GKCKFS-----GKDIYTYLIGE---  
KINYPGL-----  
LKDGEIANDVDSNFVAMRHLSLAGLLSDHKSNEGINFIIKSSYVFKRYLSIYGFVTFKDLRPNSTF  
TNKLEAINVEKIELIKEAYAKYLNDVR-  
DGKIVPLSKALEADYVESMLSNLTNLNIREIEEHMRQTLIDDPDNLLKMAKAGYKVNPTELMYILGTYG  
QQRIDGEPA-ETRVLGRVLPYYLPDSKDPGRGYIINSLTKGLTGSQYYFSM-  
LVARSQSTDIVCETSRTGTLARKI IKKMEDMVVDGYGQVVIIGNTLIK--YAANYTKILGSVCKPVD-  
LIYPDESMTW-----YLEISALWKNKIKQGFV----  
YSQKQKLAKKTLAPFNFLVFKPT--TEDN---  
AIKVKDLYDMIHNVIDDVREKYFFTUSNID-----FMEYI-----FLTHLNPSRI-----  
RITKETAITIFEKLYEKLNYTL-GGGTPIGIIISAQVLSEKFTQALSSFHT-----  
TEKSGAVKQKLGNE-----FNNLTNLSK-  
NKTEIITLVSDDISKLQSVKINFEEF-----VCLGELNPDITLRK----ETDRYV-----  
VDIIVNRLYIKRAEITELVEYMI-----ERFISFVIVKEWGMETFI---  
EDEDNIRFTVYLNLFVEPEELNLSKFMVLPGAANKGKISKFKIPI-----  
SDYTYGDDFNQTKKLNKMTVELMNLKELGSFDLENVN--VYPGVWNTYDIFGIEAAREYLCEAM---  
LNTYGEFGDYLYQPCDLLASLLCASYEPESVNFKFGAASTLKRATFGDNKALLNAALHKKSEPINDNSS

CHFFSKVPNIGTGYKYFIDLGLLMRMERKLSDKISSQKIKEMEET--EDF  
>u1\_Yabdi12085054  
----MAVISKVTYSLYNQEEINATDVLINHVKNDDD-----IGTVKDGRLGAMDGAL-CKTCEKTELQC-  
FGHWGKVRLYETHIVKPEYIGEVVIRILNHI--CIRCGFLRSREPY-MEDVT--KLSVH-----  
SLKRLKDRILS-----KKKSCWNSKCMQPYQKITFS-KKKVCFINKSD-----  
EITVPNALIYQKITSIYKRFW-----  
PLLEIYQNPENLFYKNFFPVPPLIIRPAISFWIDSIPKETNELTYLLGMIVKY-----  
CNMNAEEQVIQKAVIEYDDIKII-SNNTTS--INLSYITSG-----  
KNNMIRSIVARRKQDARSVIGPDTSLTINEVGVPEYIRNTLTEKIFVNPFTSKYVKKLFANNE--  
IKFY--FNKRLNQL-----  
TRIKPGKFIKNIHMLPGDWVEVSLRENSIIIFGRQPSLHRYNVIASVVKYTEG---  
DTIKIPPGIANSQNADFDGDEEWMILEQNPKAIIEQSILMYPTTLLKHDIHGAPVYGSIQDEIVAAYSFL  
KIENLTLNEVMNILGKYGL--NFNAN--GKKLFS-----GKDIYSYLIND---  
NVNYPNV-----  
LNNGNIIASDVSSDFVAMRHLSLAGLISDYKSNVEGVNFIKSSYVFKRFLEIYGFVTFRDLRPNPDF  
TNKLEAINAEKIELIKDAYTKYLNIE-  
KNKILPLSKSTEMDAVETMLSNLTNLNIKEIEEYMQKTLQENPHNLLKMAKSGYKVNPTELMYILGTYG  
QQRIDGEPA-ETKVLGRVLPYYFPNSKDPEGRGYILNSLTQGLTGSQYYFSM-  
LVARSQSTDIVCETSRTGTLARKI IKKMEDMVVDGYQVYGNILLK--YSANYTKILASICKPVE-  
LIFPHESMTW-----FLEISALWEKIKKGF I-----  
YSQRQKIIKKT LAPFNFLVFIEES--DKNN---  
SIGAKKLYDMIQNVLEDVKEKYFFTITNID-----FIEYV-----FLTHLNPTRV-----  
KISTNTAINIFKKFYEKLNYSL-GGGTPIGIISAQVLSEKFTQALSSFHT-----  
TEKSGAVKHKLG FNE-----FNNLTNLSK-  
NKTEIITLISDDIAKLQNVKINF EF-----VCLGELNPIINLGK----DKDVFI-----  
IDIIVNRVYIKRAELTELVEYMI-----ERFISFVSVLKEWGLETNI---  
HDEYNIKYTIYSKFVEPEELNLNKFMMVLLGAVNKGKISKFKIPI-----  
YDYVCYEDFNKTKKMYKMTVELMNLKELGTFDLEDVN--VYTGIVNTYDIFGIESARGYLCEAL---  
LNTYGEFDFYLYQPCDLLSSLICMSYEPESVNFKFGSATALKKATFGDNKALLNAALHKKSEHVNDNSS  
CHFFSKVPKIGTGYRYFVNLELLTRLEKKS VKIAKQKVEMLTEL V-EDF  
>u1\_Myxvi9633704  
----MAVISKVTYSLYNQEEINATDVF INHVKNDDD-----VGTVKDGRLGAMDGAL-CKTCEKTELQC-  
FGHWGKVRLYETHIVKPEYISEVIRIMNHL--CIRCGFLRSREPY-LEDVT--KMSSH-----  
ALKKLDKILS-----KKKSCWNSKCMQPYQKITFS-KKKVCFV NKSD-----  
EVIVPNALIYQKITSIYRRFW-----  
PLLEIHQKPENLFYKNFFPVPPLIIRPAISFWIDSIPKETNELTYLLGMIVKY-----  
CNMNADEQVIQKAVIEYDDIKII-SNNTTS--INLSYITSG-----  
KNNMIRSIVARRKQDARSVIGPDTFITINEVGV PAYIRNTLTEKIFVNPFTLKT VQKLFTDNH--  
IKFY--FNKRLNQL-----  
TRIKQKFIKNIHMLSGDWVEVALKENTSIIIFGRQPSLHRYNVIASVVKYTEG---  
DTIKIPPGIANSQNADFDGDEEWMILEQNPKAVIEQSILMYPTTLLKHDIHGAPVYGSIQDEIVAAYSFL  
RMEDLTLDEVMNLLGKYGI--EFDAR--GKTKFS-----GKDIYTF LIGE---  
KVNYPGI-----  
LKDGTVIAPNVSSDFVAMRHMSLAGLIADYTSNVEGVNFIKSSYVFKRYLEIYGFVTFKELRPSSDF  
TNKLEAVNTEKIELIKAAYERYLCDVR-  
EGKILPLSKSMEADAISSLSNLTNLNIKEIEEYMKKTLQDNPDNLLKMAKAGYKVNPTELMYILGTYG  
QQRIDGEPA-ETKVMGRVLPYYLPDSKDPEGRGYILNSLTQGLTGSQYYFSM-  
LVARSQSTDIVCETSRTGTLARKI IKKMEDMVVDGYQVYGNVLIK--YAANYTKISASVCKPIE-  
LLYPHESMVW-----YLEISALWDRLKHGFI-----  
YSQKQKITKKILSPFNFLVFIEET--DEDN---

AIGDKDLFNMIQEVIEHVRENYFFNVSNIID-----FIEYV-----FLTHLNPSRI-----  
KISKLTATNIFKKFYDKLNYSL-GGGTPIGIISAQVLSEKFTQQALSSFHT-----  
TEKSGAIKHKLGFNE-----FNNLTNLSK-  
NKTEIITLISEDIEKLQSVKINFEF-----VCLGELNPCITLTRN---EDGIHT-----  
IDIVIHRLYIKRAELTELVEYII-----ERFVAFNVLVKEWGMETTI---  
LDEHRIQFTIRARFVEPEELSLNKFMVLPGAANKGKISKFKIPI-----  
NEYDYEDFNKTKKMYKMTVELMNLKELGTFDLEGVN--IYPGIWNTYDIFGIEAAKGYLCEAL---  
LNTYGEFQDYLYQPCDLLSSLLCISYEPESVNKFKFGSVSALKKATFGDNKALLNAALHKKSEFVNDNSS  
CHFFSKVPRIGTGYKYFMNLELLMRLEKLTSTKISKQKVEELSELS-EEF

-----  
-----  
NCVOG1117, mRNA capping enzyme  
-----  
-----

>ASFV\_9628208  
-----

MASLDNLVARYQRCFNDQSL-----KNSTI-----  
-----  
ELEIRFQQINFLLFKTVYEA-LVAQEIPSTISHSI-----  
RCIKKVHHEHCREKILPSENLYFKKQPLMFFKFSEPAS-----LGCK---  
VSLAIE-----  
QPIRKFIELDSSVLVRLKNRTTFRVSELWKIELTIVKQLMGSEVSAKLAAFKTLFDTPEQQTTKNMMTLI  
NPDDEYLYEIEIEYTGKPESLTAADVIKIKNTVLTLSIPNHLMLTAYHQAIEFIAASHILSSEILLARIKS  
GKWGLKRLLPQVKS-MTKADYMKFYPPVGYVTDKADGIRGIAVIQDTQIY---VV---  
ADQLYSLGTTGIEPLKPTILDGEFM-P--EKKEFYGFDVI-----M--  
YEGNLLTQQGFETRIESLSKGIKVLQAFNIKAEMKPFISLTSADPNVLLKNFESIFKKKTRPYSIDGIIL  
--VEPGNSYLNTNTFKWKPTWDNTLDFLVRKCPESLNVPEY---  
APKKGFSLHLLFVGISGELFKKLALNWCPCGYTKLF---PVTQRNQNYF-----  
PVQFQPSDFPLAFLYHPDTSSFSNIDGKVLNMRCKREINYV--RWEIVKIREDRQQD-  
LKTGGYFGNDFK-----TAEFLTWNLM--DPFS-----FEEL---  
AKGPSGM-YFA-----GAKTGIYR---  
AQTALISFIKQEI IQKISHQSWVIDLGIGKGQDLGRYLDAGVRHLVGHIDKDQTALAEV--  
YRKFSHATTRQHKHATNIYVLHQDLAEPAKEISEKVHQIYGFPK--  
EGASSIVSNLFIHYLMKNTQQVENLAVLCHKLLQPGGMVFTTMLGEQVLELLHENRIELNEVWEARENE  
VVKFAIKRFLKEDILQETGQEIGVLLPFSNGDFYNEYLNTAFLIKIFKHHGFSLVQKQSFKDWIPEFQN  
F-----SKSLYKILTEADK-----TWTSLFGFICLRKN-----  
>u2\_Me1sa9631502  
-----

MEFNINSIIDKFWQFYST-----HNPVD--  
-----  
NVHNEIELTYLFDNLLLLSNIA-S-YTETKKKLQLEYII-KYVDKSIKLRQRHEYDYPN---  
FEITNTYMIQKL--TNQWTIKKLINKIEENIGN---EKFI---IAHNTEEDNIKNNMIIPPKKLIM-  
SNVTIHLSSIIYFIINGNVRVEFKL-KGTLGAADNNKMM-LQTYLNN-----  
VLTYKQFTSYIEIEILN-----KL-----  
SKDEFYRDITNAFRYIYSINNLNLFALS-----  
TKNISPSVKTFLMPLFDSL YLMDKSKYFLT SKIDGEVVQFTVKNG--ICDIVL---  
YNFIFKNKQTNIPNHIVMKGFGYK-KIDNVKTIYPFVFTIYSTDSKQK--  
YNTRYEMIKFYNDNIKN--KEFDI---TFKHKPIPIEK---DIVNEAIAYKSLD-----  
EKITDGVIL--LD-----KESNIDYKLIKIDNTVDVIAS-----LNTHK---SPNKIHKDG-

IYMT-----FNLYMND-EKNITELL---KVEMKSND-----LITYDNDINMLKFKNIHNR-  
YGKNIL---YAPLCCIV-EYSFL--KSKIIVNIRLDKTTKFFKS-NYYGNSLKVILDSKT-----  
FHEKYVPLD--TVGIDYLYTM--FKINNEIYD---KKNL---  
ILNQNVKEYFKEPIENNOQQRPLNIFTNLIKTEAISIAASKLCAEIPN-  
RHVLSIDIGRGGDINKYYYIGISGMLGTPDISALSEAQERYNSLQTRKRVNSTVYKFSS--  
NISILDHDYLNKVKSTYMTQQKIKYFGLIEWQMAIHYSYNVDTKNKILNILK-  
NLSTDGTKVIITCLNGNKIKNLLINNQNIKYKI----QDN--IYYNISKVNDDKIK-----  
VLYDATMTTWLEEYLI-  
YDTIIEDFNKYNFILDMMFEFKDIYNNDAMLVLKTNSLFPRKATSVFYKNILNQNT--  
KDNQVLELMNLFKVYIFKYKSYKK  
>u2\_Anocu578887626  
-----

MEYEINVLIKEFIEFYNNVT-----  
-----YIDDD--  
KLHNEVEITYLFPNLILLSNLY-Q-YDECKKTTYLEFSL-  
SYTDNKKRIKFRQIVPYTTQDKFEIKNSYLANLKFVNKLDIKSEISNKNILLNESNKEKII---  
FRHSTEKKIIDSITLPSKQELLKNQVRLTFVNSIRIMIDNLIKIEFKY-KANLGSASSNSLA-  
LSTYLN-----IDTARILTTYYLEIELLSN-----TKI-----  
DNDILINVLNKSFGYIFSIRNLDNFSL-----  
ISNEYVPIKTFMITYDKLHIIDKSAYVMTPKINGESVSFYVENG--ICNITI---  
YNFIYKNINCINKNVIMSGEGELI-IIDNIKHIFPFYFNLI--KDNKIS--  
YTDYKQIEFYNTSIINFKSNMKI---HFRNKNIFKFES--  
NNTVNEVLKFYRSILINDMYKDINDGVIL--LDISN---NNVKKDYKFKLDNTVDIIAK-----  
LETHK----GIFRTQKDG-LYLT-----LSLYNYD-NKNFVKML---  
EINLKNEDLTTMIHDKKLISYDNVINMLL FKNVD---FGPKIL---VSPIYCIV-EYSFM--  
SSTIIKLRIEKTNKFERN-NYNGNLLNVILSSKQ-----FHEKYNMLSVIDNKLDYMIEL--  
NKSNNLLTEETHRSKL---ILNKDVQNYFL-----EQTRTSLNILTNYIKTEAISITVSKLCSIIPN-  
RHVLSIDIGRGGDLRKYVVYVIGISGMLGTEPDISALETARSRYKEFQISSRAKSSVYKFNSI---  
NISILDDNYINRVKEIYLIPQRIKFFGVIEWQLAIHYSYNEDTKMNILYKLK-  
NLAGDGTKIIITCLNGDLLSEKLQNNPHLNYKI---SDT--IYYKISKIDDNRIS-----  
VLYNATMSTWLEEFLLI-  
KKTIIINDFKNYNFVLDIDFTFDKIFNNDINKMLRVLAVFNRKSTKDFYSNIINDKNIYENKELQELLSFF  
IVYIFRYSSSLT  
>u2\_Mytse506497896  
-----

MSIEINEIINKFVKFYDNIK-----  
-----LDTNE--  
NIKNEVELTLINPDLMLLSNIYTE--NESKKTYLEYNL-KFSKKSCLRQRHEYDYST---  
YEIPNSHLTDRL--TNNWETKTVIDEEKIDINKH--EHVL---MRHNIE--YIDNNIELPLINDIF-  
DRISVIFVSQVYIIIDSVLKIEFKI-KSYIGPLSSNKLS-LSTHFND-----  
IDTSRKNISYYLEIEILPN-----IKL-----  
ENNILQEKLEKAFSYYKSTNISNLSLV-----  
TIKEPSRIKFTTIQYNKLNITDKDSYVMAIKIDGNVNFVTKNS--ICSVII---  
YNVIYKNYKCNIDKNIEIKGMGEYI-  
KVNNVKKIYPFYFTEIKYVNRKATNIIENRYDQIQFYNSIITSFKEPMQI---KFENKLTLLKFNE--  
NNVSTNVVNFYKSID-NSNMKDIYDGIIL--IDISN---NKDKKDYKFKIDNTVDIVCR-----  
LDTYR----GVYILHSGGKLHIS-----FSLFAYD-DKNFAELT---KYTVKSD-----  
IIKYISDANLLVFNNNDK--FGPSKL---LSPIYCIV-EYSFL--HSKIIGLRIDKTNNFYRQ-  
NYYGNSLDVILSKQ-----IHEQFPS----NYNIDYLLSL--NESSIIDNNPHRSKL---  
LLNKKVDKYFL-----DNTVRTSINILTNYMKTNAISMSISRLVTVLPN-

RYVLSIDIGRGGDLTKYYYVGISGILGTDPTIAIQESRERYKNLQLKSNAQSSVYKFHTL---  
NISILNDNYENDVKQSFMNQKINFFGVIEWQLAIHYSYNNNTKDSILLKLK-  
NLSSNGTKVITCLDGNELINRLNINEHIIYNI---QPG--ITYKITKISEDRISE-----  
VLYNATMTNWLEEYII-  
TDGIIYDFAKYNFILHDMFTFEDIFNKNTYKTIDILSNFGRKSTNMFYKTIKNSNIYNNEDINKLMSLF  
KVYIFIYSSYN-  
>u2\_Amsmo9964449  
-----

MSIDVSDIINDCIKFYSNIN-----FDSNP--  
NVNNEIEFTYINPDLRILSNIYTD--NNESSKKKTYLEYVL--KFANKKSKLRQKYKYDYPT---  
FEIANSYFLDKL--TNNWERKTIISEDKININKN--EYIL---LRHNT--YQDNDIELPLNDIL-  
DKINVLVFSQLYIIINDLIKVEFKI--KSNIGPLSSNKLL--LSTHFND-----  
IETYRKNITYYLEIEVLSK-----TKL-----  
DNNVLYDNLVKSFEYIYKSKNISNISLV-----  
TIKNPKIKTHMIQYNKLNITIDKESYIMAIKIDGDVVEFNVMMNG--ICNIII---  
YDMVYKNFSCNIDKNIQMIQMGGEYI-  
KVDNVKKIYPFYFSKLSYNNKKIINNILDYKQIQYNDNLLCHKPNMQI---KFENKLTCLKFDE--  
NNVTTNVLKFKYSIE--NSSFKNIYDGIVL--LDITD---NDSKKDYKFKIDNTVDVICK-----  
LDTYR---GTYLHNDNKLYIT-----FTLYQYD--NKNFTEIL---KYEKNE-----  
IIEYNNYVNLIFNNNNK--FGPKM---LSPIWCIV--EYSFL--ESKIIGLRIDKTNNFYRQ-  
NYNGNNDLVILTSKH-----IHEEFPS---NYNIDYLMSL--NETINVIDNPHRSKL---  
LLNKEVNKYFM-----NNTIRTSINILTNYLKTNGISMAISKLVTTLPN-  
RYVLSIDIGRGGDLTKYYYVGITGMLGTDPTIFAIKEARDRYKKLQTISNAQASIYKFDSL---  
NMSILNDNYENEIKNKFMTHHKIQYFGVIEWQLAIHYSYNNNTKDMILLKLK-  
NLSNDGTVIITCLDGEITNRLNENPNLIYNI---QPG--ITYKISKISDDKIS-----  
VLYNATMTEWLEEYII-  
TDKIIDDFAFMYNFILSDVCKFDDIFKYNSDKSVEVLSNFLRKSTKKFYNDIKNDKNIYNNDDIKKIMSLF  
KVYTFVYSSCK-  
>SGPV173  
-----

MNNTGSEIVA EYGKMYEKIR-----ESNMD--  
LEITELEFTQFDPSSL SLSKMFSPNIKPLTDSYLEYILNKTSDEGNNIKIRIRIDFAVVGGLELNKQL  
LDYV--EHGCWESKETKDIWLSPD-----EFGF--ITSATE---KQGTYINKVIQS--  
GKINMIFVNRARVKFSDFV--VDFKL--KRKLGNCRQGNI---SNLYKS-----  
VNNAMYPPNPSLEIEHTGQ-----FKK-----  
PWKDVKLEFTKVISWIIGHPIEEILTTT-----  
TPLFKIIPTSVITPAYLMNSIDPTQHKLTPKINGVGVMMFKIDKHHVLVQQMLGPKVISIWR-  
YKHLTVTEDIYGSGEFIFDSHSCICYPMI-----  
LGHDVSTYKWEVQDCANLPYDHVL---IKSKQWTGPFND--ITDMLTAIYEMTVSK-----  
HSYETDGLILSSSYRHG-----KCDYKIKATSDIDIVGK-----V-  
RFTYAGKSDPRQMATDGMILT-----VDYMSKN--ATNELVKINDNRIKLSPE-----  
FDYLNDFCVKTRRVPQLVKLSHA---VVPIGFIC--EYDV---RTKEIMIRLTKSSTHLWT-  
KYLGNWTTIQTIQHSVPILADLKLKLSKWKSP--EARDHTVLQD--  
VKINGTKSMNEMDDGLDPDRLNPKTT--YFK-----  
ENRIRSPGLYISNFVKSLLISLYASKMFYSNSKKARVCSIDFGNGADLTIFYAGIQELIATDPDSAAID  
TAHDYRMKLNKNEKSNY--YRFNYL---KTSIRNENFVSVIRTVTDQLN-----  
FDVIDWQFAAHFSWNHKKHIQIMHSLC--EITKPGGRVLITTMNGKGLSILDKDSSVTFKIHPIEPT--  
GYTTITKTSPTTFS-----

VLTPLT TTTTAMTEYIIDPDQMIKTFYDYG FVLLDQGRFDEVFNINVPFFKAGS LLETRPSTASFFAQQRG  
VVHDIKNTQLDQLLKYYIYMVFQRGT---  
>u1\_Canvi40556130

MDNYILEKPLGSHFEELVDTFFFAIR-----

NVSEVDKSKHHEVEMQIFKPSIITLSNLY---NISTTTESYIEFSM-MPIDKK-  
NTKYRNRIPLSKIHGLDIKNSQLVENL-DGFIWEEKTLISEKRV-----SECTNIRIRHSVE-----  
QKTLFVDYKRRN--GSIRLELVSVVRATLRNIV-VDFKI-KYFLGSGAQSA----  
SSLLYA-----LNNPKNKPPLYLEFEISTS----D-KNI-----  
SKQLLLNELNTIGNALFLSKVDKIRLC-----  
PRIKLVLKTYLLKKQEIINLNENLYITSKTDGVFTYVLLQNKSIYCYFSH---LGYIKE-  
YTANREIDEKVLYAEMR-KENGI-----LYFTVIKVLNPR----MKNRLDELK FVNKNLQNI-  
NDRLV---FVTKCYEGPFDS--TSDLVFAIEEMLKSE-----HEGVII--FYSCG---  
EESLDYKIKKDNTIDQCVN-----V-IYRYMS-SEPVVFS DNGPFIE-----YKRYSD-  
DKDFPKEFATGKLSLGNL-----VKYLNNIYCI EFTNLPEH-TGVEKI---IVPIKFIA-  
EFSF---NDKMIQPRIDKTMRYLYTENYYGNQLSVIID--H-----LNDQ-----  
KINIGDV FEE--DKLAEVAHKQL-KDSL---RLNPEGN-YFI-----  
ANKKRSALGVL SNYVKTL LISLYCSKAYLDDH SKRKVL AIDFGNGADLEKYFYGEI ALMVATDPDEMAIE  
TGKKRYNNLNSRD KSKY--YKFNYI---QETIRSPTYVDSIREVLYFGK----  
FSIVDWQFAIHYSFHPIHYSTIMKNLY-ELTESGCKVLISTMDGDYLDTLKDKKKFIIYKS-P-ETE--  
NYLSVEKIDNDKIL-----  
VYNPSSMTKPM AEYIVRKDTLVRVFKEYQFSLIDNCSFKTIIDRSIN FVKGVSRL ETRDSTKNFLELNRN  
ALEDC EGTDVLELLDHYMIYVFSKN-----

>u1\_Nilcr115531773

-MENK-

LGEPLSAMLDELVDYFESA FR-----

-----ENRFD-

AARHNEVELILLNPPLSAVSVLH---TIATVEESYVQYVL-----  
KAKDAKIRNRLSVKDVHGLDVKNYQLVERL-DDANWERKAPVWEKSF-----PGAT---  
IKHSTE----ESH PFTDYRNYS--GNIKLEFVNLVRARAKHLI-VDAKF-KYFIGNGSQNY----  
NSLLYA-----LNDPAAKPGVTLEFEIDVSREHLEREGF-----  
SFAELRASLYTVCQALFLAPADSVFLVQ-----  
GGGPRPPVPTNMLKKYQLQTLETADLYVTEKTDGVLTYVLLRDKDIFCHFAH---LGYFIR-  
YRGRRKFAEPVSLMGEMT-RAGSGEKV--VHF IKL--QTP--A--  
LPDRLEERAFVEERLSDLGGGITI---AVKRYHG PYAT--NGDLIAACATLLREY-----  
REGVIL--FYRHA-----APCDWKLKKNVTVDQAVN-----V-VYRYMS-NEPIILGDRDTFVE-----  
FKRYS-N-AHGTPKEFGFGKLVLSDG-----VNYLGNIYCLEFLQSEHD-TGLERV---  
LVPVKFVG-EFSTAEGDDSLVRPRLEKTM LYL YSRNYYGNQEA VILE--H-----LEDQ-----  
RVRLGELLTGAPDVMAEAGKRVA-RDAL---RLNPDGS-YFS-----  
QNRTRGPLGILSNFVKTQTISLYCSKT FMDNNAKRKVLAVDFGNGADLEKYFYAEAAVLIATDPDPA AIA  
EANSRYNKLNSGSKSKY--YKFAYL---QATIRSDAYLDEVRKTFYSGR----  
FDVIDWQFAVHFSFHPLHYSTVMRNL A-ELAAPGAKVLIT TMDGDYVASLAEERRFVIHRT-Q-AED--  
NYLSIEKISDEKAL-----  
VFSPTTMKRPMEEYIVRRADLNRVFE EYGFRAIDYVTFYDVIARNRKFLAGVSKLEARPSTSKFFALNRD  
AVN-FEGTDLEELLRRYVVYV FCKA-----

>u1\_Orfvi41057127

MDAPSLDCMLAALA AKAASVDR-----

-----GAPED--



EVHHEVELVLVDPPLSTLAATL---RLASETESFILFTV-TALAKEEG-  
KLRARVPMRSRVGLDVKNVQLVNAI-DSIVWERKALVEETALQ-----EGCL----LRHSTE-----  
RRHLFVDYKKYL--SAIRVELVNRVRSKEVV-VDFKF-KYFLGSGAQAK-----  
SLLHA-----LNHPKVRPSPTLEFEVPA----G-EAV-----  
DEAAVLTELRAVAKALFMAPTDAVFL-----  
PPAEMPVRTLMLQKEIPALDLDGLFAVSKTDGVSASVRVDENGVFCAFSH---LAYTIR-  
YPLAREVQGRYRLWCEAV-RPVG-ERVWSMFVLVV---EEP---A---GDDRVA AVAGAVEALRGV-  
CARVE---FKPKRVDGPFSA--TSELVEHIKSALQTE-----PEGVVL--FYARG---  
EKSKRDLKVKRDNTVDQTTN-----V-MFRYMS-SEPIVFGEGSTFLE-----FKRYS-N-  
DRGFPKEYGAGRIFLRED-----VVYHNNIYCIIEFTKTHLE-VGLRSV---VVPVKFIG-  
EFSQ---EGYLLRPRLAKTECYFRNPSFYGNQHSVVLE--H-----TRDQ-----  
LLSVGDVDFE--SRMAAVGQTLA-NDAF---RLNPDTP-YFT-----  
NRRTRGPLGVL SNYVKTL MISLYCSKTF LNNAERRKVLAVDFGNGADLEKYFFGEIASMVATDPDARAIE  
RAMERYNRLNAGLKSRY--YKFNYI---QETIRSETYVESIRQVMYFGR-----  
FNIVDQWMAIHYSFHRPHFATVMRNL-ELTAPGCKVLITTMGDGFLSTLSEKTSFVINRNLQ-ESE---  
NFMSIERVADDQVM-----  
VYAPSTMAQPMTEYIVRRADIVKLFADNGFDLVDHANFETVIRRSRRFVEGVSRL ETRPSTKNFFELNRN  
ALTEMDSTDVAALLKIYVLYVFSKR-----  
>u1\_Squvi549059681  
-MDAT-  
PEHPLSEFLGELARAAAEVAA-----  
-----EPAAV--  
DVHHELELVFIRPPLAALGAIV---GLATEQTSYVLFTV-----  
SSRDGVKLRVKL PMSRVHGLDAKNVQLVDAV-DDIWEKKTLSQRELAG-----GACL---  
LRHSTE-----ERHIFVDFKKFG--SSIKLELVNLIRISARNIV-TDFKF-KYFLGSGTQAK-----  
SLLHA-----LNHPKSRPNATLEFEVLR-----DADA-----  
TAEQLAEELTTVARAIFMAHPDNVFLV-----  
PPVRDPIRTHMLKKQNILSLELQGLYATSKTDGVAATVRVDASGVYCFNH---LGYVIR-  
YPALREVEEPVVLFG EAV-RSAE-DRRWHVHLIKL--VAP--T--LESRLEEHEFVERRMEGL-  
CDRVV---FRAKRFMGPFAS--VSELTDMLTEELPKQ-----EEGVVL--FYASG-----  
EAPDMKIKKDNTVDQAVN-----V-TFRYMS-SEPVI FGDKATFVE-----YKRFS-D-  
ERGFPREHGSGRIVIGDS-----VAYLNNVYCLS FAGTHDT-VGLSRV---VLPVKFVA-  
EFSH---DGTLLRPRVDKTMRYLYSSGYYGNQHSVVVD--H-----LRDQ-----  
ALSVGDVDFVG--EKLA EAGRNL A-NDEF---RLNPPTS-YFV-----  
KNRTRGPLGILSNYVKTL LISLYCSKTF LDNANRRKVL AIDFGNGADLEKYFYGEVALLVATDPDARAIE  
RGCERYNRLNSGIKSRY--YKFDYV---QETIRSDFVSSIRKVFYFGR-----  
FDIVDQWQFAIHYSFHRPHYATVMRNL-ELTASGCKVLITTMGDGFLSSITSTRSFVINRALQ-ESE---  
NFISFERIDDEQVL-----  
VYNPSTMAKPM AEYIVKKEALVRVFG EYGFVLIDHVD FATV VRRGRA FVEGVARMETRQSTRNFFDLNRV  
ALADMRTDVEELLQYVVVYVFSKR-----  
>u1\_Molco9629022  
-MDEH-  
LERPLEYYFRELVAEFERAVRRGDSAVKKNSPKRSRAPQSLTNSKGNAGGKAEPEPELENGNTGAGAPKA  
RTRAAPEAQAAHPPVSAHKS RPRAHA AFTSRARTEEREPPALEPVHGPAPAPAADTTSDVHHEVELIFV  
RPPLVTL SHLL---GIATRQESYVLFSL-TSLERE-GVKLRTRLPLARVHGLDMKNNQLVEAI-  
DSILWEKTRVAQRDFPE-----AHCL---LRHSTE-----EQYVFLDFRNFN--  
SAIRLELVNHVQARVRNIV-VDFKL-KYFLGSGAQTR---NSLLAV-----  
LNYPKFRPSVTLEFEVLLR-----DPAAF-----  
SPRELLRELLV LGNLLFMAPAEHVFLM-----  
PAPKEPLTTHMLKKQDLLTLELRDL YVTGKT DGVPTFVHVAGASVYCFESH---LGYAIR-

YPARVTL PAPVALFGEAV-RDAQ-SKQLTVYLK--MAP--A--LEDRLEEREFLRRLQGL-  
CERVA---FQAKQYEGPFAT--SSELTDALAQMLAAQ-----PEGVVL--FYARG---  
SRSGADLKLKRDNTVDQAVN-----V-IYRYMS-SEPVIFGDGVTFLE-----FKRFS-N-  
DKGFPKEFGTGRLVLAEG-----ARYLNNIYCLEFADTHSG-VGLRKV---VVPVKFVG-  
EFSH---DGRLLRPRLAKTMLYLSNANYGQASVLE--H-----LQDQ-----  
RLRVGDVFRE--DKLADAGKAAVADAH---RLNPDTA-YFT-----  
KRRVRGPLGVLSNYVKTLISLYCSKTFDNPKNRKLAVDFGNGADLEKYFYGEIALLIATDPDARAIE  
CGRERYNKLNSGNKSKY--YKFDYI---QETIRSESVASVREVFYFGK-----  
FDIVDQWFAIHYSFHRPHYATVMRNLA-ELTASGCRVLITVDGDFLATLTRKRSFVIHRDLP-EPE--  
NYISFEKLDSEHVL-----  
VYNPSTMAKPMVEYIVRKQALVRVFGGEYGFVLVDHVDVHTVVHRSRAFIDGVAQMESRTSTKNFFELNRA  
ALQSCRGLDVEELLQYYVVVYFAKR-----  
>u1\_Vacvi66275903  
MDANVVSSSTIATYIDALAKNASELEQ-----  
-----RSTAY--  
EINNELELVFIKPLITLTVV---NISTIQUESFIRFTV----  
TNKEGVKIRTKIPLSKVHGLDVKNVQLVDAI-DNIVWEKKSLVTENRLH-----KECL---  
LRLSTE----ERHIFLDYKKG--SSIRLELVNLIQAKTKNFT-IDFKL-KYFLGSGAQSK----  
SLLHA-----INHPKSRPNTSLEIEFTPR----DNETV-----  
PYDELIKELTTLRHFIMASPENVILS-----  
PPINAPIKTFMLPKQDIVGLDLENLYAVTKTDGIPITIRVTSNGLYCYFTH---LGYIIR-  
YPVKRIIDSEVVVFGAEV-KDKN---WTVYLK--IEPVNA--INDRLEESKYVESKLVDI-  
CDRIV---FKSKYEGPFTT--TSEVVDMLSTYLPKQ-----PEGVIL--FYSKG---  
PKSNIDFKIKKENTIDQTAN-----V-VFRYMS-SEPIIFGESSIFVE-----YKKFS-N-  
DKGFPKEYGSGKIVLYNG-----VNYLNNIYCLEYINTHNE-VGIKSV---VVIKFI-  
EFLV---NGEILKPRIDKTMKYINSEDDYGNQHNIIIVE--H-----LRDQ-----  
SIKIGDIFNE--DKLSDVGHQYANNDKF---RLNPEVS-YFT-----  
NKRTRGPLGILSNYVKTLISMYCSKTFLLDSSNKRKVLAIIDFGNGADLEKYFYGEIALLVATDPDADAIA  
RGNERYNKLNSGIKTKY--YKFDYI---QETIRSDTFVSSVREVFYFGK-----  
FNIIDWQFAIHYSFHRPHYATVMNLS-ELTASGGKVLITMDGDKLSKLTDKKTFIIHKNLPSSE--  
NYMSVEKIADDRIV-----  
VYNPSTMSTPMTEYI IKKNDIVRVFNEYGFVLVDNVDFATIIERSKKFINGASTMEDRPSTRNFFELNRG  
AIK-CEGLDVEDLLSYVVVYVFSKR-----  
>u1\_Yabdi12085062  
-  
MDDNLKLSLLDYIKKLCVFKTIKN-----  
-----PLPTE--  
DVNNEVELIFIQPLITLGNLL---NISSVQESFIMFTV---  
GNKGKVKIRTKVPLSKVHGLDIKNIQLVDSV-DNIIWEKTLVYEDVIN-----DYCL---  
IRHSTE----EKHVFLDYKKYI--SSIKLELVNLIQTRIKHIQ-VDFKL-KYFLGSGAQAK----  
SLLHV-----LNHPKSKPTPSLEFEIVNT----D-IKI-----  
DENELNEMYTLFRSIFMNLPENVFLV-----  
PSFKNPLKTYMLKKQDIAGLHLENLYATTKTDGIGTIVKIKQNEIYCHFSH---INYCIK-  
YLANRTIENEILLYGEAL-KHKG---KWSIYLK--MKP--K--LENRIKEKDFVDENLKEI-  
SEKII---FKVKYEGPFSS--HSEIIDLLTFYLPVQ-----KEGVIL--FYIEG---  
KNSNSDYKIKNDNTDTHMIN-----V-VYRYMS-SEPVIFGDSNTFIE-----FKKFS-D-  
EKGFPKDFGTGKIILTES-----IKYLNNIYCLEFSNVYED-VGIKKV---VVPVKFIS-  
EFSS---KGCLLPRIDKTMKYMYS-DYGNQYNIIVMD--H-----IMDQ-----  
NIKIEDIFNE--EKLSDIGKNYA-DDKY---RLNPEVS-YFT-----  
NKRTRGPLGILSNYIKTLISLYCSKTFLLDSSNKKKVLAIIDFGNGADLEKYFYGEISLLVATDPDSKAIE

RCNERYTKLNSGIKSKY--YKFNYI---QETIRSSSYVSSVREVFFFGK-----  
FDIIDWQFAIHYSFHKKHYSTIMKNLT-ELTASGGKVLITTMGDGKLYNLKDKKTFIIHKS LP-SSE---  
NYMSVEKINSEQIL-----  
VYNPSSMSKPMEEYIVKKLDIVRIFSEYGFELIDNVNFDTVINRSKKFINCVSKMEERQSTKNFFELNRE  
ALK-FDVLDVEELLSYVVVYVFSKR-----  
>u1\_Myxvi9633712  
-MDE--  
SKKRGTDYIEELIRVYEDVPN-----  
-----PVQTD--  
DINHEVELTFIHPPIIALSTLI---HVATSQESYILFTV-----  
TNKGVKIRNRINLSKIHLGLKNIQLVDSI-DNIIWEKKT LVKEHKVD-----PAAV---  
VKYSTE----EKYIFLDYKKYL--SSIKLELVNVVQAKVKHVT-VDFKF-KYFLGSGAQAK-----  
SLLHV-----LNHPKSKPNPSLEFEIVTT----D-EKI-----  
DSVSLRKELVALFKLVFMTSPDNIILD-----  
GILKPPVQTVMLKKNLPGIDL TNLYVTTKT DGVGVLITVTNKGICYFFTH---LQYTIR-  
YDTTFKSDNPVTLYGEAI-KQNN---VWHVYL IKL--MTP--K--LSDRFKEKDYVEEHLKDI-  
CDRMI---FKVKKYEGPFES--HSEIIDLLTSYLP SQ-----PEGVVL--FY-SD---  
QRNQPDYKIKLDNTTDHVMN-----I-IYRYMS-SEPVIFGENSTFLE-----YKKFS-D-  
DKGF PKDYGTGKLALTDN-----VRYLNNIYCMEFANAYED-VGIKNV---VVPIKFIS-  
EFGSA---TGEFIKPRIDKTFRYLYM-EYYGNPYQVVVT--H-----IRDQ-----  
SIKIGDVFDE--DRLSDVGQHYA-NDKY---RLNPDVS-YFT-----  
NKRTRGPLGILSNYVKTL LISLYCSKTFLDNSNKRKVL AIDFGNGADLEKYFYGEISSLVATDPDKEAIT  
RCIERYNLSNGIKSKY--YKFDYI---QETIRSTTYVSSVREVFFFGK-----  
FDLVDWQFAIHYSFHPKH YTTVMNLA-ELTASGGKVLITTMGDLLSQLTDKKT FVIHKNLP-SSE---  
NYMSVEKIHEDQIL-----  
VYNPSSMSRPMQEYIIKRANLTKIFSEYGFELIDCVHFDTVVERS KR FITGVSKMEERKSTKNFFELNRE  
ALK-YEGTDIGDLLRYYIVYVFSKR-----

-----  
-----  
NCVOG1164, A1L transcription factor/late transcription factor VLTF-2  
-----

>ASFV\_9628193  
METNCPN ILYLSGITIEECL-QTKKTAT-----  
DTLNTNDDEAEV-----  
-----EKKLPSVF---TTVSKWVT-----  
HSSFKCWTCHLYF-  
KTVPKFVPTYMRENERGEIEMGVLGNFCSFSCAASYVDVHYTEPKRWEARELLNMLYRFFTS--  
QWISYIKPAPSYTMRKE---YGGKLSEEAFISELHTLEESISSKHIFI-----  
>SGPV099

-----  
METDKL-----  
-----ILPNHHDIIKYIHS DILEYN-----NDSKTCLTCGNDI-  
GPLVYKLET LFE-----  
GKIGAF CSPACSDIMAGCVSHAISLKSPSRMKLPPLCMYKNSTR LVETVT-----KEMEKC YG--  
TQQRVGNMVRVLIKKNLD-----

>u2\_Melsa9631381  
---

MNEYKTDFTKQEISEAALNL IKDLKSMFYEIHYIANQAI INDSIKCIYCNDECYNGNVFN I KENSINIGY

FCSNICRDIFYSIIQFIFNIPPNK-VNFIPFQLLDNSKEDYNVIKKIFKNIDYKNLILFSKYN-  
NEQIISNFKIIILKNNKIWHFTYKFNFKETKINKCLNCGSEE-VDKDIILLTKYK-----TLQG-  
FCSVICKDNICKQVYYTLIPKYKYLTVSPTQLLKNVD-VKTMIN-----  
KLKNKSNVYGGYTTYDSKNIKLEYFTPN-----  
>u2\_Anocu578887579  
----MDYKTDTEKEKIDAAYKLIKNYKSKFYECKYENNISILSDSNECLYCKT--  
HHTKHISIIITNISSMGYFCSELCKMIFYSIVQFIFNLPVIYMVVFIPYYLLDNFSKKKFQNIKTEIEKYN  
YKKIIISSKFY-NKYLITNIKLLSCDYEI-NLKYNFNITSSSTCLYCTSDI-  
INNNIILETKFN-----NITG-  
FCSMICSNSICKQIYTTLIPKYKYNLYLIPYELIRNKNHINKIIN-----  
NLRYELNLYGGYITHDKYNYKIEFFITKQ-----  
>u2\_Mytse506497790  
----MFKTDITDEEVAESAARLIKNYICNFYKIEVEKTIEIEYKKNKCIYCGD---  
HADEITINNNINIGYFCSDLCKTIYYSIIRTIFNLPITNVINFIPYLLCENSKNNYKLLKDKISKHSC  
INISIFSEYK-NNNIKCDFIILTNEGYSI-KYNVNFNHITDSNLICIYCNIQD-  
INDDIYIKHING-----IIGK-  
FCSKLCRDSISKQIYTTILPIYKNSYLIPYELVKDKEEFISYIN-----  
HVKNNDNLYGGYPLLYNKSKIELFTTT-----  
>u2\_Amsmo9964361  
----MFKTDLTNEEVSEAAANKLIKNNTCNFYELKLENILDNIDL TNNCIYCNND--  
VIKDKIIIDTNNIKVGYFCTITCKHIYYSIIRTIFNLPPIHKIINFIPFLLSEESKIKYKNIKNIINYYN  
YDDISIFSKYKDNNNIYTEFKLLINNKFI-YLQESFEYISKSNNCIYCYSTN-  
INDKIILEHNNG-----IIGK-  
FCSIVCRDSISKQIYNTIMPIYKFSAYLVPFELIKNKKEFLNNIN-----  
HIKNIDNLYGGYCHLTNNKTKVELFITN-----  
>u1\_Nilcr115531785  
----MQRLAPISVSDPK-AAKSGG-----  
GYVVS-----  
-----ILPNYF---AVLASERQDVS-----  
EDGSACWFCRQPLEPDGARRIETLFS-----  
RSFGYFCSRICADSFAAGVKHIIPLREDPKVSLLPLVCYRHPERVLAVIN-----GLRDTAGVYGG-  
VLFKNR--IDIELKSI-----  
>u1\_Canvi40556007  
----MYKKVNLSGIIISEPK-SVKKNRI-----  
KESINN-----  
-----VVPKYY---QVLTDKNLKI-----  
KDNNNCWFCQQLSFTHYFIKTLYG-----  
DDIGFFCSKICRDSFANMIKGVIALREPKVSLLPLEVYENPEEVIEIIN-----ELREKEGTYGN-  
CIL-ETDNNIRLTLRCHCSNNIE-----  
>u1\_Orfvi41057139  
----MKRIALSRVDISAPRASACAPPA-----  
ACRIEY-----  
-----VLPKYF---NTVSAERLALR-----AADGTCWFCRQRV-  
STAALAVETLDG-----  
GAVGEFCSRRCRDSFAGSIRHLVALREPKIELLPLEMYADPDRVRALIN-----ETRATEGVYGR-  
CYLEADGRTVRMALKSLI-----  
>u1\_Molco9629035  
--MAAPRRISLPSVTISAPR-AVLRQER-----  
QEPLSC-----  
-----VLPEYY---YTVAQLRLQVN-----SERARCWFCSQAV-

GAAAWAIETLHG-----  
HAVGSFCSRICRDSFASTVRTHVALREEPKVTLLPLVFFQHPEKVLELIR-----SLRSREGIYGT-  
CFFDERAGAVTLTLRSLHEQDETAGGVFNDARDSK  
>u1\_Squvi549059697  
----MAKRVLSDVVISAPR-NVYRPER-----  
EEALAC-----  
-----VLPRYY---RSVASARVPVA-----APADVCWFCAQAV-  
LGGPLVVETMNG-----  
GSLGAFCSRICRDSFAGMVRSCVALREEPKITLLPMVCYSDPAEVRVVN-----DLRDREGVYGS-  
CFLDEARGSVHISLRSLV-----  
>u1\_Vacvi66275916  
----MAKRVS L PDVVISAPK-AVFKPAK-----  
EEALAC-----  
-----ILPKYY---KSMADVSIKTN-----SVIDKCWFCNQL-  
VFKPISIETFKG-----  
GEVGYFCSKICRDSLASMVKSHVALREEPKISLLPLVFYEDKEKVINTIN-----LLRDKDG VYGS-  
CYFKENSQIIDISLRSL-----  
>u1\_Yabdi12085074  
----MAKKVSLPNIVISSPK-SVVKPVR-----  
DEEISC-----  
-----ILPKYY---KSVADVTLN-----ANTDYCWFCYQNL-  
IIQPYFVETLKG-----  
GKVGAFCSNICRDSFSSMIRTHVAIREEPKITLLPLVFYKDPEKVVNIIN-----TLKNKEGVYGS-  
CFYKENDKSIQISLRSL-----  
>u1\_Myxvi9633725  
----MAKRVS L QDIVISSPK-SVIKPTR-----  
DESLTC-----  
-----ILPTY---NTVANVSIPVN-----TNTVTCWFCKQDL-  
IVVPLRVETLKG-----  
QVGYFCSRICRDSFAAMIKTHVALREEPKITLLPLVFYKPEEVINIIN-----SLRNKDG VYGS-  
CFYKENDQSVQISLRSL-----

#####  
#####

##### filtered B22R-like protein alignment used for Figure 8 tree  
#####

#####  
#####

>SGPV159

TIFLLIVPANANKPEFSLEKVESPKV-----  
LQVPSVDVLDVLNKYDFDSVRPNVTDI-----  
DYHGI-----LDQCTDETTEDRL-----  
TLTSTKTIQQLVNQLPVSLKCFTK-----DITYKTNKNTTEITTI-----  
KTEEYSGTFKNLQMDPDDFYFE-----  
QMKIGGDGKTTELNKK-----  
EDFMIKLIP----VYTPMNYSDPMFYHNR-----SSPILENVYD-  
IWRYKKLYPF-----VMDIKI-  
DKQSAH-----  
NSDEYD-----

-----  
SDTDLYSIDQVSIDSKLEKSLNRPPELLSLFFEGLQTTG----  
TGAVSRSAVGSIMSGAVGMAGYLGQAILLTQINQIP----PAPETPYQHQVFLSK--  
TGQRHCNPAVPLTVYAGSS--LYNSNS----SMLTDTLQTIIVTVTTGSGIIND-  
KIRVGCWNSMLKSLT--VSSNKILKDKTGAIHWHILNLDHHLRTHNILEFTCGAEPTLKF--  
IGEPYQEVKIWR-----PTDTTGDSMRACTEHPKQIWNLAGCSLNVDTLQGHYTCGQLLAGSS--  
KSDEKFILMTDI-VADSMVKIFEFDQN--QEFDMDFVHSKAARSYCKGGLVNGCVWPENLWKYNDK---  
KKQRTFKVGLS---ADFSRFQFVCPSTNLRVINDTAGHIEWTVSETGQVDIF---  
VDGIFSTISMECHDPDFVTDTRFFHKVS-----  
GDEDVSTEVE-----  
-----VTDYRVDWFKTHY---DPLYSDDKSKSSLK-----  
VGGYTLKSSWRSNSGES-----  
VCVIDDEQLECSG-----  
VATNILTFFQKTDAPKVI STTFLFDMTFEKSNSHIMIPVEIQMKKL----ETLLTLGTSKFSEILNK-  
AEFKQWPGQVYVTAQAIIDDFTQAEAEAYFKEVRDELVKLQKEVSHSLGSDPDM-----  
CCYDNT--TTEFWK--DDWSCQLHCF---EKASVMWPVDLFDVFDIVKEIILKMIHMVELNSADEI--  
MTHDVVTLTEIET-IQQIIDRLDVEHSVVP--YLCAIFV

>SGPV162

SFFTVCLFMSLV-----  
SLDRLDPSVLQYVDDIDSVK-IQGYTT-----GIKWV---DTVCTNP--GPLF-  
ESEFRDSSLDMLF----TVITQEA---VEKYISPKSDP-----EGLIRSEKFTN----  
IGMELLGKVVALLDSYNCTHNHTTQIFSTYTAN-SQKPRVPNMVDDL SMQK-----RKSI----  
NLCLVKNNGP-----ESPINSRTLKVHPDLTRNFASILFYFNGT---  
IIEDVSEFEETGKEIRNTRELLDVTESRKDAMNM-----  
TATEEVLRLYLQKD-----  
KDMQLE-----PLDH-----  
GGYVLKE-----

-----  
FFQASETSWRKDVWTHLKDNTDRNLKIASVVF GALSSVSGSTMVGGATMGPVVQIGGGILGVGQLGSTAI  
TLFEMFKARPDVRDINTEFWVNYKQFIDSPAAGVRKCM--GGVNTHIQMAYRS--EMNDKA-----  
WMDAPKSIVVIQKNVISHDMSNLFVECFSGKLRMTEGNIDAFSNLVSK--DGRQLYRV-  
DYSGLSKWDRVSLTCGKEITLEIE--FTEAHDHMMFLPGSRTGDSQGSWTSMSDVCMTDPLKRIYTTL-  
GCKYDLSTIRHETSCSLMYDMSVYDNIKHRFITVSGIDNNQTSVKVFFFPQG--

QNYTLDTTVDGQSKCLKVLDPDTCHWPEMVTVRNTY--PNKVRI FNVKLG-----  
TKFGLTCTPGSQIDYIGEAGDCQVQCFAGKESDIFRVTTTKATGFELTSRFGTNVRQHVTDFD--  
ARTEAMVMNKFTTVVDFGENMIGNTWKDMVLVYGC PGKSEECHLMNGTWT---  
RKNVKYGFVSDSLTFEENVKVSSCSATVRLSDQLTLACTIKDFDHSHTETGVFFCDQDNQRTCEMYNNG  
DVISSKVSQYVTTGKLYGIDVISTQLLGNGME-----CMAGIKSMVNL-----  
GIKADET--MIRNQIKTKCG-----HTLMEGALPSWCNPWKPVRISKFDIDLISY-  
TVDPVKIDQVYQQILSLKQHVRDENGMSDLKTMVS-  
EYSSNGIVTTMDQISDDYENHEMYKNEMVNKGLTKL NITSTLTGQTWTDYVMERDYVCCGWN GTTQE VNI  
YGDKCEDTVFVYQTRVCGSEVCPLTTTFLGCALSGEQMALQLFEKDKILNAIKNPLVDTAITRVL RSEDQ  
EVDYDLLYNVTVATCVVLTFLVFLVVLVKS KKNLTVNHS--ESQVKLLT---STASSMS--SESSISG  
>SGPV154  
YIFVVVVFSTVFDGKCYLNGFGHNTN-----QDQTLKMNSGGENVDLIGA EWREPLSE-  
DDFKHMVSVFDDMYKATSKCEEIQRMP TSVSKFDEEIKFE-  
LYTEILILPMDLNTTFFMCSNVFPEKFQDFNLVIHEYRMSLNFHEYIDSWADRLITINETRFLIRKAV  
NKMCQYKKSRLIQFVRKAPARPYAT-DCLASKSNNLWRLDTGKP-  
WTPVMADLKLKLIYFVGTEEDRFTFIVPYPGLCLYEPVY PEDFSTGWGGSNGSPVQELLQDYIKRNL--  
NCQMTDNILSLHAYMYGV--  
TIVGDFFRNLCTQDKTGLDVCTYGTSEIKQEFKLWTTFRERSGNIMRVPVSSHIQIKKRSIEEDDTIAG  
YSPKGDKKMFTAKLAKKPMVAADLALQMTDDRLQKVDLPSVPPIPINRRLKPGHKSTSTLDSYGD LNP  
QVRQRDAGGPSLQNPGLNNDPLYSQGD DAKRRMVEAAGKVPVCGGRSVCSPKSADPKPKGTQSQEGGV  
ISGRAVSIDTSMFMGA-  
MVSQMSQNNERLLDDYVRGKSPEKSTAVAVLKLTDQTGSALMGGVTGNPIAMAGGMTLMFATGLATTVM  
TIYDIMTRTQ-  
KHDLLIEKYSYSKDMNTELAGNRWCLPPQTQLTVILGSQRDNDKVTENINLMWGSSGETRIEVL MNNI  
IESDTTIIIVKCAGGWLRFKEVSSVPYVRKISNQTGSSTFEIYSVHALMSMYPSISGGCSDLVDLYITAKQ  
VPNNQISVLTLSNPYEPQEMADLPSDVCDQYPFKLYVSI PGCSYDNDVSI GWTTCDQLFRNAYWSSANE  
TWMILNPFakeGDNIKVWTFKKRDFDYPLVPNSNP SHRELGKIENLNVFKW-  
VMYLSDVSGCTNKIRVFGITISSDGS SLNQLQVTCPVQATPLGLVLQSSLQEFSLDKFYTSKR FMSTDPD  
LVWIYCQDRSSPNIKSDMILKFDAMETSPEH SKQNWAGNDRLLCQSRSM TW-GTTCLHDFTPNNIK-  
EEVINVPG---ITCPASGF-----SNTDESMETIQLGMFNGFKVVIPVQTLERLN---  
PAFWTLIERKKTFSGMQLTLGACDTGVAPLVQAEFSIDGIVFNGQYASSALRH NHRL----  
CHAYISANTRLAFDCPN-AIPIPRNK--  
MCLVIVTSADQCRDI ACTIRYRGLVREQMRTGYTGGRSPG SFCERWYDS-  
DRDLFNQSQTIIKVGLDMYLPQM--  
KPTIDSIVDPSNDLYIKWDMKLYFDLITDLKNLQEMKNSALTKGINQLADRLTKGGKEISR VNI PV DYL  
VSKQVEREKEI ELQAKILQRLEQMYTNVIPSTDLRKL SHQDRRCCILKQDTTVEFY PDVDWQC PPS-  
AFYFGPEHDWMSNVLSRYFNERYENTWVVC MNREVFGEDETEKVEHEMLMDVYEDGMMEIVHEMSWM  
TEIVANDGV MYMSN  
>Cyprinid\_herpesvirus\_422933904  
QMAFVAFLLLL VMDKFS DGMPE NSMVSSMGNGALSSGLEIEDEWEGLKLDGFSWSRVSKILKDILNSCY  
DMQYTYPLRAALPVNVTNAVAVFLDGSEKVEVVFSGSNGNTTFVDSRQY NNEYCAMVRLKNTITISLSMMN  
VTGIPTGGQGLP-  
NVDCVLKVM ECPNIIITTTTTDTTDTTASTMNETTAAPDNITTSVEEETSPPPPPKCMLT----  
VRPFLPKYDQYTMFSYSGINRSFVYDFT-DNFCSSRHDAKSGV VLPWRYM NKT M----AAVDNKTIV--  
QGPLQKLIKNTNVNFFEV-----LRETHCNTWEDLSLLSAKLDLQVKASTSETVL-----  
DYMVMQMPAHQQISLQPKPYRRPGTIKSLTRVDHQNMLCMNHEVGD SNPSTRRRKTGGDFKGRGNADYS  
IRGARHGGVDISKLSNQLDMLRIKLN GKYPQ--  
GGGAGAGG DGGPGLAAARGGSSNSHYHDQMGGGRRSVGGRRATPGNGGGGGGNPDAAPGGGNMLATA  
GAIDPMMMAGMMMSTSMSASNTRSIDNILTNKNKDLAVTLASLDKLN EFGSMMAGGMAAALVVAGIGLA  
IQIVTSIVTFAIQIYQIRFPTNPPRDELLEK YSEYRKL LADAAGNRWCMMPE SKLDVTLAFNHHNDNN

REKTTSMWTPAGETRIKVLYNPLITFNAALRVTCADGVLRNFENFSKVARQSTE--  
TGTSVWDVTQIASMVAAPVIHGRCGEVSNLIIEREYISETEMVLLQKRGPGEGMTTSMPSDVCDLFPF  
KRFYVSMPCSFEGEQHVGTSCSMMFKRAVWNPINATWMPNPFAPRGSDRKIFTFSRRDFDYMPIRPN  
EIAAHKQLCSNAKPGLCRLPEIFGVEDTANCNNKVRFFRVYMAALDGSIQGYMMTCQPGSQAKYIVTSEN  
MHMVNLDNSGYSRTFDTEKKPLWIFCQHVSMPSYKSDVILMLDDTASEMVQVTDTYAFSEDWTESIMKG  
PGFSPGIDFKQRRKVL-----PEYKRFFKHNDIVHMELNAAAGGENDSKETFKF-----  
KTEIGLGDLDHFEVGSKWGWAMRGKATSSMQLNIGFCSVNDHKLFMKGIGTAATNIHFKVRDGFDLKL  
KKDDGQTCAVHLDLVTCLKIDCPESDMSVDLRYKDKMCFVSPAKDGCVNVACGTRSLDYKRNYWMGGYY  
YWWGSEPQIAITCQDVYNQDIDGEWRYTLMYHKTFDYTPLVEESYQSGNRLGPDDLVEAKKYKKMEDAK  
DAVGKIYDLINDPMVKAVNSMASGMTKEGREIARINIPHDFVLESEKQRQAQIVLEDEVNSLMMDLMVDA  
LSDSIWKEQEHTQKCCRLSEQTKTYQGEYDDWNVQLDNYAFQNYNYSSGKIWSPHQTYELPIHTYWITC  
MNQEIIIFENENVEKQFNASLYEELFERALRQLENNYANISDDLNGVHINPIVL

>Cyprinid\_herpesvirus\_129560658

HLLWIEVLTLADEKFSEGEKDSVVTSMGNKAALSVNLDVEDSVDGLKLDGFSWSRVYKSIRDILKSCD  
NLRNTYPMRSALPVRAIDVAVYLNKTEVVEAVFRGSELTYLRMNQTFYTDYCALVRFNTIISIQGVIFN  
VTGIPTGGKGLP-NIECILKIYESTSMTINCTTPTNCTNCTAD-----CPNSYPNETPEVT-----  
YCL---QELVKPILPVYDPQEVFSLYAAVNRTFDYTFN-  
ETFCLARHIATNGDVLWRYMDVAKMKTNTEDALEEDLKQ--NVFTLATLDVTNRLKA--  
DFFEFKESH CNTWEDLALISSKLVVSEKAVSTAVIQEFDRTVERKSQIN-  
GAHYNLNKRVRVSGPSTVKSLTRLDHETMLCFSGHHVGS--  
TNRKRWDPVDRKPRGSGEYSINAANVKGQDFKTMSNLLDVMKVKNVNGYGLGSDSLEVTGYA--  
GGGGASGGETYMGRHARDNNHTSAGRRRDAAMRPGNPGTAGKADDDPDAMP PGPHIQMTGG-  
VNPVMAGGMMMATSLSASNTRSIDNILSGKDKQLAVTLATMDKLN EFGSMAGGMAAAI AVAGVGLGLQ  
MITSLVTF SIQIHQLLYPTNPPRDPILDKYMEYRKLMLADAAGNRWCMMPE SKLEVT LGFFNRHLDGSRE  
QTTALWAPAGETRIKVLYNPLITFNAQLKVT CADGALRFNEFN-  
SKMARTRANSVGT SVWDVTQLASMVASEPVIHGRCGEATNLIIEREFISEADMILLQKRGPGEPALTAAM  
PSDVCDLFPFKFYVSMPCSYEGEPHYGWTTC SMMFKRAIWNPNVNGTWMVNPFPTRGSDRKLFTFSRR  
DFTYMPIKPNSDPQHKLCSNA-----

IKVS-----

TTS-----

-----P-----

TLNYS-----

-----  
-----  
-----  
-----

CV-----

-----

>Cyprinid\_herpesvirus\_131840165

HLLWIEVLTLADEKFSEGEKDSVVTSMGNKAALSVNLDVEDSVDGLKLDGFSWSRVYKSIRDILKSCD  
NLRNTYPMRSALPVRAIDVAVYLNKTEVVEAVFRGSELTYLRMNQTFYTDYCALVRFNTIISIQGVIFN  
VTGIPTGGKGLP-NIECILKIYESTSMTINCTTPTNCTNCTAD-----CPNSYPNETPEVT-----  
YCL---QELVKPILPVYDPQEVFSLYAAVNRTFDYTFN-  
ETFCLARHIATNGDVLWRYMDVAKMKTNTEDALEEDLKQ--NVFTLATLDVTNRLKA--  
DFFEFKESH CNTWEDLALISSKLVVSEKAVSTAVIQEFDTRVRHKL TNGAHYNLNKRVRVSGPSTVKS  
LTRLDHETMLCFSGHHVGS--  
TNRKRWDPVDRKPRGSGEYSINAANVKGQDFKTMSNLLDVMKVKNVNGYGLGSDSLEVTGYAGGGAGGASG  
GETYMGRHARDNNHTSAGRRRDAAMRPGNPGTAGKADDDPDAMP PGPHIQMTGG-  
VNPVMAGGMMMATSLSASNTRSIDNILSGKDKQLAVTLATMDKLN EFGSMAGGMAAAI AVAGVGLGLQ  
MITSLVTF SIQIHQLLYPTNPPRDPILDKYMEYRKLMLADAAGNRWCMMPE SKLEVT LGFFNRHLDGSRE





-----  
FIIKKGSP-----  
-----

DNMHMLNLDSMGARTFDTEEKAPVWIFCQHMSMPAFKSDIILMLDDTTAGQVSLTDNYAFSENWANSI-  
-MFRISRIGRWQ-----

YDIPENRIKFLPEIKRHIPMSDVVQMDINGNGENFDSKETFSFKTEMSLHDLDDHFDEVGRKWDWAQRGK  
ATSSVQVNIIGFCSTVKDHVMEWGKGTADTDSVFKIPDGKDLTLKAKDPTCNVYIDLKAGLKIDCPTTDL  
TVDLVSTTTMCVTVSPAKDSCAKAACGTRTQKLKAYWEDKDPYYWGSEPRIGYYCQDVRRLTDGQTRS  
TLVYQKMYDYTPPMTKSYQSANRLGSDDLVIEAAKYKMEEAHDAVGKIYDLINDPLVKAINSMASGLTA  
EGRQVARVNVPHDFVLQSDQQRLAQIILEEQVNELMMDLMVDALSASKWEEQFHIQKCCVLSNDAPSSE  
QPWSLF-

VELDMYAFLNYNETSGKIWGPQMTYETPIDRSWTVCLNREIIFETEDIEKQFNKTLYEQIFERELRKLEN  
EYGNMTDKLNNVGIRGATV

>u1\_Nilcr115531707

AFFTLALFVALLTDEMCFGKSIYHLQGDVGP----

TDLDLTEMCNFVKRTLKAPWSNYSEDLRNLEELCQLQKE-----

NDNNEASVVVF-----NGPSSNVSSKNNM-----DLYGFSG-----

WIGSDQATLIAINESGNTGLPRYDSRNTCNLTIDQVITNIPQHYVNLTRRLDGPSTDYFCQ-

VTNNC---SIINVCSSQILGTGMQNTRPKNPN-DEEAERAYCGD-----

KCTKARVRSRDKTKPKGPFQKQFGSSSLVPPNGDRAQVGVGDVGPVVVGGADTLGAAGGDILGMRQQLP  
IPTKGGQTVSLN----

KREGSLPPVPLDKEGLTIGFVKDPGPNRIVTKPSFGSGGRQLPSGPDSVSRFSPRWEVVTDQDRQGGT  
SPGTRPTARRSSNQGAVGGYDLPGDSR--

PLPEGSEIGRPFDSNDSGGREGDGVYLGNGFRPQSQPETQSSRHIGGPSSSSGGRSTPIPLTSRHQTD  
RFDQLHRG-

NRDHFLGGAFVGSMLSFEHQTTITKIRNGDDRAQDVSAAVGDLNLRVGSVMSTGMIGSPHVMIAGLAGQA  
MAGLIDLGMIIRALITGEHPPDPIAEMYSTYAKYMSNEAGARLCLLPDSRLTVTAVYRHRGTDTEAEK  
SLLHASDTVPSIVQYLSTDLADYTAQVEVICPRGTLRLLQGDISQYILQDAGTDQAKHY-

YINAMKMVSSFPNATLTCGSEEGLYFVYPKDPDFQLLDRTGIGEPDSLRLKPSNVCDLFPFKRFYFLT  
SGCEYNGQVAMSHTTCSVLLRRSLWDEKHQRWFAPDPFAHPGSDVKVFTFSRYDFPEVPLKPNIEIPGHDD  
YCTVRNGQICYFSEPMVLDDQYTCRPRSRLYVEIAPGSTGFTAFLVLTCPWLSTPVVQPPWAPVTRVNVG  
QSYTSAMFAFSAAGTAYLYCQHNTDKRLKSDMVLAKSPDDKTKFTNTWCKTQQGSTFLVSFYKASKTC  
TSTMFKRNMIIYNNWVTYPPPLDAVVKVIKQPRVILSEYASADLNGMLERVGKYYPGSLYLYTYDVTGLEEGY  
MNKHFFWENAKKHRTYSSLAVMIFACEVRNGRYKKWETIDVYF--

PFDDGWGSDYFFPTWKNLCQANISIAADRLHVTCKSYSIKIIRQRQ--LCVSLTTSIDHCN-

GDASVARRGYLRQEAVNSRNYGSFQHLYC-

FPMYLIIMPKVQICRSFVLFYQDLEIESEHFTPPYPTTQFLSPNDTIIPASMYRTVLELKDLLDELMDYS  
RNPLIREINNFAQFLTDGGRQIARVTVGDLLLETSYLARQELIQLEDAIRAKLVELVDLIIDRNEAARQA  
EEHSVCCILDATNTSKTFPDGYLFCGYSDFIIDYGGVRYLIINDTLEPEGYVAEETPTTCLDMYYLITND  
KERAELEELLSKLLIEDAIQTLFDEYDNFTEIEMNDDTPETG

>u1\_Nilcr115531704

STFTAVALMLIDDQLCFSKSIYHTTHHQDKDMI-----

DGMRSYVNRSLGEFPWDFNDIQNIQDMCLTFQNTNGFMMG-----

N-----GPGSKAETCLKSGSGSNF----NLVAMNATNNDTDTLLSNTSCLHN-----

ISEGAVYDSKPKPCISLQRENLTLPNSFYNSVSRDLNSIDYFCRIGTGEC-

TDLFEINRSQILFGH----GNVSDDVDSRNVMLYCGG-----

CNRARLRADKKKKEGPFKFGRLTGNKHVIPPGATRVQLGADGRPVSVSGGGPGLDDTRQRLLELQGNAPL  
PVGNDPMMKLQLGQNKDKFQMGGQIIADNLPGGTRPKASRPLPRPGGDTLYAISGGPRGGARPPSK  
KDYAKRSRPPRRSSDFEIPS---

GGRSNAGSRSPSGNDEYQRTFRPDSDFEIPKRGS GGRRPETSSGWSSDPPVKNSDWDGFDMDTGKLS

PNPPVPRKPPPLCGSRLDDKMLQMG--RKQQLGGA-  
FLSATLSSSHQSTIDRIHRGDDHAANVANVVSEVLNKVGS AVTAGMTGNIPAMVAGLTGQVLGGLIDIGL  
TIEALISGRNAKPDPAELYSTYARYVASHEAGARLCLLPDSRLSVTVAYRHRGMDAEAEKSLPHASDTP  
PSVVQYLRTGLAGYTARVEVTCPRGTLRLLQGDINHYILRSEANDNTKHY-  
FINAVAMVSSFPNATLTCGIEEGLYFVPYDPDPDFQLLDRTGIGEPDSLRLKLPDSDVCDRFPFKRFYFLT  
SGCEYDQVAMTYTTCSVLLRQSLWDDKHRRWFAPDPFAHPGSDVKVFTFARYDFPEVPLKPNEIPGHDD  
YCSVRDQPICYFTEPMVLDDQYTCHPRSRLYVEIAPTQSGVTAIVITCPWLSTPVVIPSFAPVTRVNVG  
AGYTTAMFSFKASGVANIYCOHNTNERMKS DLI VSSVIPKDKPGYLIYNQTEKNKIIDSFQLMMYLSKKC  
TIEEMKSFNTYGHLPWPQLESTLRIVKKERVVIAENIDADLNR FVERVGTYYPGGLSLEYDVS WLEDGY  
HNKQFFWKN AELGRYTSALSVVIFPCNVRAGHYTNLDVIDLY-NADDGTGSGREFPFRS-  
TTKECEASISIKDRLTVVCKAYSIRIIWSRE--  
LCVALTTSVNH CNSDEEAVMKSGYGRREALSDYVYWYYPHLFC-  
YPPYPI SVPKVHVCHTLSIFHHELEIESQHFSPPYPLSKFFSPDDV IIPAE LYAAVLK LKESLSLLMEYT  
RNPLIKEINTFAK YLSDEGRQIARVIVDGM LATSYLAREEMIILEEQIHERLIELVELI IDRN LAKRKA  
EEHSECCIL DVAKTSKAFDDGFYLCAYESFVYPDEGTRYLMVND SVELEDGYMNESV VSCVEIMLMV GEG  
DERDEIEEQSKILIEEAVETLFKEYDNL TLSIM--NL TNATT

>u1\_Nilcr115531705

AAAFTAL AALLVEDRICFSKSIYHSLK-----  
AHEALDRKDG FVREFLGGLPWDEYL TNVTNLQWLCENTTDPDGGVL-----  
SSAADVI-----SCLNASGD-----RMYGSGGFTVAINGSNSEEK CML-----  
GGYL I HSSFNHSCDLTLLNAR-DNLTVPEGYIMNLDHLDVAGISYFCRIQTDEC----  
RDEHILLSLSVYSKNKPKTLQNSVEVDVMNMYCKT-----  
CILLRTRSDDPGPFDPGSDSDSSGRRIPP GTDMVQFGPSGPKNGAFGSSRDL DKASGKLADLKKMFPI  
PTDTIEDLQIGRDP TLPGGIMGG--  
LDKTNIGQGSVRSRAPSGAPHGRSSSVPTSPRGRGSGGRASWPPPGSDSMPVPPQPPARPQFPGSSDGYD  
TSEGMDGAVNRRRLPRNL PVNPPYSSDSGPVRAPRSGETSKFGLNDGRGQRDRSDSDSDTPDRSRRRSED  
DICGAGVDN---RDRLQERFKKAQQQRQAALGAA-  
FTSVLSLSTSHYTVTERLYRGDDRGADIANVVSESLNKLGS SVAAGMSGNAKVMAGLVGQSIGGLIDIGL  
AIYELVSGNRPDPAELYSTYAQYVATYEAGARLCLLPDSRLSVTVAYRHRGMDAEAEKSLPHASDTP  
PSVIKYLRTDLAGYTARVQVACPRGTLRLMQGDIRQYLLQFEGDDNVKHY-  
FINAVAMVSDYANATLTCGIEEGLYFVPYEPDPSEFQLLD RAGIGEPEDLRRLLPSNVCDLFPFKRFYFLT  
SGCEYDQVAMTYTTCSVLLRRSLWDEKNRRWFLPDPFAHPGSDVKVFTFAKYDFWDATLKPNETPGHDD  
YCTVRDSQICYFSEPMVLDDQYTCHPRSRLYVEIAPKTTGVS AIVITCPWLSTPTVLPPWAPVTRINVG  
KGYTSAMFSMTEQTASIYCOHNTNERMKS DLI VTSRVPNGAKDIGFDTRDDAERIRTI LGEFPKLAKTC  
PNSHYITELNWP SKYELPKEKCKVSLVKRERIVIAEYADADLDAVIDRVGKYYPGAISTTYDVTQLEDGY  
VNKHLFWSNADLGRYTNALMVS VFAC SIRGNRYERWDLIDMYPL TNNWKG DGLYTFSSF-  
KSLCDATIKIRNRLEV SCKSYSVPILKGRQ--LCVSVTTSINHCN-GDNVAATR GCTLEESE LIPKMPY-  
PQYYC-  
YSNNAWRLPYHYHVCRSFVIYYHDLEIESQYFSPPYPLARFFSPGDV IIPSA LYALVLELKS AVASLADYT  
QNPLIREINAI SAYLTHGGRQITRVFDGEMLAAS YEAREERIQLEDEIRSTLV RIVDYISDQEEVRRQS  
AEHNRCCLLNVERTSEVYSDARYTCPYEDFILADNETRYLMVNNSLGLESAYWNETQV SCTEVAVMLTGP  
EDIRDLENSIDRTLIEEAMDRI FEEYDNVTDIIMESDSGTLPD

>u1\_Canvi40556064

PIGYLSLYILISGYDTCWRKGLYHDMQDL DKKSSLAKYLSIAKREQS RLLHNFNWTEIKESVKDFNRSCN  
LGNDYYNYTLETSLYNTLLSTVLGVNESSYILVSVNSSSIQHDSIQFPHGKCDNVFPERVFI VNTKLV S  
LEGSISEGNFSSSSTMCIQ-----  
ENRSYKVHVESSECEYCSMKFMARVTSIPESFNDTMEGIVSNTNSFYCSISGEECSEFIFDSTLNTHILKT  
SYNHSR SRRSVFTEELDCMHNAY-PEPIDSIKRRSRNPK-----  
NDFMARKQLGNKPVIPPKVTHLQTGIYKKEGSGVSGD GAIYSEVKKNVKTI RQMAPVPSSGPEDLATVTKP  
KKVKS NFTEISTI QSSVSRKDRYQSIYSSIDRSEPV DITERQLEQLGDQSRRSASEFEETAMEKR SKR

RSTSEERKEQSIMRKGIGPPSGNKKIKSGKAPSSPTPKVDTGSVTTPPPDNYNEGPTNKKARCRRSIDVSM  
RKPSTSSPKPYSGNPDVYESDGNKSYKGTMKQISSSFDKSVFGGAMLLAGQQAIIHQSRQSVLQRKDS  
EGEKVLEAVTMSLSTLGTTLSAGMAAGPKVMAAGMAISAIISGIIDAAKDIYKMFTNEEKPVDPVIKLFNT  
YSGHINDRGAGIRKCMVPGPEEMVYISYSNDNFKPDMEKTALYFLDVIDSQVLYMNTSNIILDYSLRVAC  
PIGVLRLDITAYTTMYED-  
NGVRKYVFTRLGVLRSRTPVRLTCGRDATLTIRPYEVPISMQLLKMATPGEPKSTMSIPSDVCDKYPL  
KKFYLLAEGCPYDSQNFIVHTTCNIMLRMSTWDPVRNRWVLQNPFKQEGDYKQLFTFSKYDFNDTVIDPN  
NIRGHASFCANRQSSECYWTESMILEDVTSCRSRTRKIYVKIRVGDGRGNSFVLTCPSGSTPVYIGDNSS  
IIELPVGDYGTSKLFASTSGKRIGVFCIHNYDSRYKSDIILIFD--  
KYSYFGLQDDFGSRRTFFNTMSFMPYRSRMCNRRKGCNIGN-----  
VDFGNPNVEIEIHNSPKIMFKETYDNSIDQVADKSKKYFPGSIELNIHVPNLGNAYRRPDKFWEDASKMR  
TYSSMLVNIIVPCTPRSKNIM-  
GNPISLYFQSTEEYGDGSYYYFTRTYNADCSAVLNLQSRMTVKCNPFISIPRNITYHEGLCFVMVTSRDHC  
ATEREDLKTSGYRSDVNTRVCHAKLLDHYCSFGWHN-  
YYPDYDDCKSYIIIEYNDVWAESEVLQPPYTFEFKYDKNNEYVNKELSDRMSELYDEYKKLIEYTDGSLPN  
SINRLAKALKEGREITSVNVDGNILELAYQADKEKIEIQDKISEITKEIFANTLSEADLEIMSAENDRC  
CIIDHNNKTKYYPIDKYICGVSDYVYDEEDRKYVLINNTYIPYDYLSEAVVSTCYNSIIPLHTKEARKMA  
EDAIISSAVAEALNEIFDEIDNISLALINEEENYLSS  
>u1\_Fowvi9634769  
KFSWYITPILISGYKTCARKSLYHMQDIDRKSSATRYLQIAKKEQSRLLSFNWTKIKEDIRSFNRSCN  
LGNDYYNYTIEATITSGDAMKFLISVLDVETVEIMGNSTKNSDPNLYSNCNNVTANKVFIINTKVVS  
LSNNTDDGSNVNSDLKCISI-----  
NDTVYTHEVISGCEKCSMKFMASVTSVPEDFNNTMEGIEDNTDSFYCNLIDDDCMEFILSSTVGTELKHS  
NTSHSRHRRSISSEEFDCRYLYYPVSNMDCINRRSKEPKEKD-  
TGFTARKHLGNKPVLPKASHLQVGIQKESGVTGDGAIYNDVKKRAKDVSSIAPLPSTGPEDLTKVRKP  
KKLKSDFTEVETIQKKSISLKHGLPVYTRIERSEPVDIEDKQLQELGNV-  
SRSSSSFEPRRRSDSYSSDYPPPLPKIIMKKGTEGPAGNAIKKNTAPSPYSPKVDGTGVTTPPTSGQN  
EGPTDKSNRCRRSLDIGMSKPEGTSGPESYSGKPSIYEGDGTGGYKGSMMKISSSLDKSIFGGAMLMAG  
QQAQHQARQSVIQRKDTKEEKVFEAVTMSLSTLGTTLTAGLAGGPKLMIAGMAVTAITGIIDTVKDFY  
LFSGIERPDKPLIKLLDYSGLINDRESGVRKCMVPGDSMMIYMQNDSFKPEKENTELYFLDTINSEL  
LYMNTSDIILDYQLRVACPIGVLRSPTDITAYTIMYDGE--  
VKKYVFTRLGILLRTPVRLTCGRVTTLTIRPYEVPMSMQLLKMATPGEPKSTRSIPSDVCDKYPLKK  
FYLLADGCPYDSQTMIVHTTCSILLKMSTWDPFRNRWVLKNPFRQEGEFKQLFTFSKYDFNDTIIDPNGV  
PGHSDFCTNKQSSQCYWTESMLEDVTSCQTRVRKIYVKIALGDRGFDSFVLTCPSGSTPVSIDGNDKII  
ELPVGDYGTSKLFASTEKKRIGVFCMHNYDTRYKSDIILIFD--KNSNRGIKSNYNDRDKLFTGLS-  
MPFRSRYCNRRQEC-----  
YFGDVDFTPNDVELDIHHSSEIMLKESYEESIDDIVKSKTSFPTSIVTFTVNNLGNAYKNPSRFWEDA  
INKRTYSAILISLVPCTSRNKDIL-  
GYIVSMYLQSTEDYGDGKHYYFKKIDTSECRALDLNSRITVSCDPFSIPRNVVNYEGLCAVVTSKDHC  
ATEKEWMKNHGYTSKYSSHRTCITYPTDYYCGYGIYD-  
YFPDYDSCKSYIIIEYKDLWIESEVIQPPYTFEFTHDRNNEYVSKELSDRMNELYEEYKKLIEYTDGTLPK  
SINRLATALKEGREITSVNVDGNILELAYQADKEKIEIQDKISEITNDIFIHTLTDQDLEIMAAENDRC  
CIIDRNNTKYYPIDKYICGVSDYVYDEEETKYVLINDTYITYEYLSGAVVTTCYNSIIPLDTKESRKIV  
EDAIINYAVSDALNDVFEEMDNISLALIASENDYIES  
>u1\_Pigvi659488472  
TKIPWCLYITTIGYRSCARKGLYHMQDIDRKSSATRYLQIAKKEQSRLLSFNWTKIKEDVRSFNRSN  
LGNGYYNYTIEATITSSDAMKFLTSVLDVETVEIMGNATINSENPNLTNVCNNVTANKVFIHNIKVVS  
LLGNTGDGSNINSELQCISK-----  
NDTVYTHQVVGCEECSMKFMASVTPVSVDFNNTMEGIEDNTDSFYCNLEEGNCMEFILSSAVGTELKHS  
NTTHSRHRRSISSEEFDCRYLHYPVDEMACINRRSKEPKEKD-

PGFVARKHLGNKPIIPPRASHLQVGIQKESGVTGDGAIYSEVKKKAKNVYSIAPLPSTRPEDLATVRKP  
KKLKSDFTELETIQKKSISSRNKHVPSIYSRIDRSEPEDIEEKQLQALGST-SRSSSSFE-----  
PPSSDFPPRSPKDRIQMKKGTTSAGNTIKRNIGPSPYSPKVDGTGTVTTPLKGGQNEGPTNKNRRCRR  
SLDVGMSKPESTSGPTSSPLAGSPPYEDGTKGGYKGSMMKISSSLDKSIFGGAMLMAQQAAQHVRQSV  
IQRKDSKEEKVFEAVTISLSTLGTTLTAGLAGGPKLMIAGMAVTAITGIIDTVKIDIFYLFSGIERPKDPL  
IKLLDTSYGLINDRESGVRKCMVPGDSMMIYMAYQNSFKPEKEITELYFLDTINSELLYMNTSDIILDY  
QLRVACPIGVLRSPTDITAYTIMYDGE--  
VKKYMFTRLGVLLSRTPVVRLTCGRVTTLTIRPYEVPISMQLLKMATPGEPKSTRSIPSDVCDKYPLKK  
FYLLADGCPYDSQTMIVHTTCGILLKMSTWDPFRNRWVLKNPFRQEGEFKQLFTFSKYDFNDTIIDPNGV  
PGHSDFCTNKQSSQCYWAESMLEDVTSCQTRVRKIYVKIALGDRGFDSFVLTCPSGSTPVSIDGNDKII  
ELPVGDYGTSKLFASIEKKRIGVFCMHNYDTRYKSDIILFE--  
KNSHRGVKANYNDRDLFTSLSAMPYRSRSCNRRQEC-----  
YFGDIDFTNPDVELEIHSSEIMLKESYDESIDDVIEKSKTGFPATAIKVFTVNNLGNAYKNPSRFWKDA  
INKRSTYSTILINLVPCTSRNKDIF-  
GNIISMYLQSTGDYGDGKHYYFKRVYGGNCQAELDLNSRITVSCDPFSIPRNVVNYEGLCFVAVTSKDHC  
ATEKEWMKNHGYTIKHSTYRACRTYPTDYCYGYIYD-  
YFPDYDACKSYIIIEYKDIWIESDVLQPPYTFEFTYNSNNEYVSKELSDRMNELYEEYKKLIEYTDGTLPK  
SINRLAMALKEGREITSVNVDGNILELAYQADKEKIEIQDRISEITNEIFIHTLDEDLEIMAAENDRC  
CIIDHNNRTKYYPIDKYICGVSDYVYDEEERKYVLINDTYIPYEYLSGAIVTTCYNSIIPLDTKESRKIA  
EDAIINYALSDALNEIFDEMNDISLALISDESDYIES  
>u0\_Cotvi377830103  
EIYILFILTIITSYETCMRKALYHDIKDVST---  
LPKYLQGVRRERTRLLLSFDWESISKSVSDFYKICDNNETYNYTYITINTQITITITLLSNIMGIEFIYN  
TGVEAIIGIT-----  
INECYNISSKAIKNSSGTLIFGETSSIDVFIDSTIKLENLINTNKISYTTNITSNCYTSSISFMSSVV  
EIVEEYNKTLNGLKSNTNDYCKLTSNSCVELILDDIANTTLINNTKTNNRHKRDLRTKELQCLYESFGD  
DDTSCLQKRSKKENKKD-  
LKMLARKDLGITETIPGGVTHIQTGVYASGTVMGDGEIYSKIKSHTKDAKKFLPVDTNLVSDLATVSKR  
KGTKSTFTEMSTVQKSNI RNPKHKYNSEYATIKVDEDQVIDQRKYGSSSASLSSSSSSSFEDDTVEYSGTK  
GSSIDSAKGMVATKEGFSTIPGVSVTST--PLTR-----  
RGAINKIGKTSPGPPQVPRETRCRRSNNVNSKPDSETS KPDVYESGGPSKKN---  
KSKYKSSMSSIATKFDKSAFGAAMLLTGQAINHQRAMVLSDNDSQSERIFEAVSMSLSTIGSTLTAGM  
VGGPKLMIAGMGISAIAGIIDTVKDIYYLFSGYERPDPVIKLFNTYSGLVSSSDMGVRKCLTPGEEMII  
FMSYRNSDFKPESEKTSLYFLDVINTDLLYLNTSNIILEYQLKVACPIGTLRSPDVIDITAYTIMYSS-  
NDIKRYMFIRLATLLTKHPVIRLTCGLSTTLTIRPYEVKISDMQLLKMATPGEPKSTRSIPSDVCDIFPM  
KKFYLMAGGCPYDAQTFIVHTSCSILLKLSTWDHIKNRWVLQNPFRQEGDFKQLFTFNKYDFKDTVIDPN  
GVAGHASFCTNRSSNQCFWSEPMILENTKSCQSRVRKIYVKLTVNGDGFTSFVLNCPSGSTPVCIKSDNT  
IIELPVGDYGSAKLFSKIPAVISVFCMHNYDKRYKSDIILNFTSNMLSYSKIDNNYHKTNMFYNLASM  
PFRSLFCNRRSGCYAG-----  
IPLHNSIDVELHYGTEIMLKETYDNSIDKVIEKSKTHFPSPLIVKFNVNDNLGKGYDNPDRFWSDAKKMR  
TYSIAIAIKIVSCTLRNKNIF-  
GDVISMYLQSDMTYGNNGNIYTFKSGNHTMCEATLDLTSRVTVSCPAFSIPRNI SNNEGLCFTVATSKDHC  
ATDDEWLKSHGYWYADALTRVCSWKCLDYCYDFKT-  
RFPNYDPCKSYIIIEYRDTWIESNVLQPPYTFEFERDINSNEYVDNEITIKLNKLYNEYKNIMEYSDGSLPA  
SINRLAKALTNEGRDITSVNVDGNLLDIAYQADKEKIEIQEKIDELTRDIFIHTLSDKDIEIISEDNNRC  
CILDKNNHVKYYPIDKYICGLDDYIYDEDNISYVLVNETYISYNYLSGVVVLTCYDTHIIPLDTKSARDSV  
EDEITSSAIAEALNDLFEELDNVSAIIKDEDNYISE  
>u1\_Cowvi325557941  
LKLSLAIYLTASCYETCMRKALYHDLVDKDSVASLPKYLQVVQRERSRLLATFNWTGISESVRNFIKICD  
VNGTYNYTISIIIRSTISKILGVNETELNLITINNTVNNTVDDNNTLINNCYNVSVSDAFITLVEILM

LTGTSSSDTFISSTIECLKTLINTIRITQNMNVTSNCDKCSMNLMASVIPAVNEFNNTLKGVKNNVYNY  
CKLTTNTCDELILDEINNTTIIRNSTTNSRKRRDLSTKELDCLYESYGNEDVSCPRRRSDKKE----  
MKLFAKKDLRIDSVIPRGTHFQVGASGASGGVVGDRSPFQNVKSRASLAEKIMPVPTTAAEQLATVNKT  
KGVKSTFTELSTIQSSAKPSHRPSDSIYSSIR-LDSEDIQTVEYNE----  
RGRSSSEFEDDTVEIQGSSSFEIDRM--  
KGRSSSPKSDLYSTVKTTLSGIVTKDYPVNTGSSVSPDPRPSPQRDYPQVRCRRASSIGMSKPDDTSQI  
EEYAGNGPNNPI----  
KKKYTSTMSKISTKFDKSAFGAAMLLTGQQAISQQTRSTALS RKDSKEEKIFEAVTMSLSSIGSTLTAGM  
VGGPKLMIAGMAITAITGIIDTIKDIYYLFSGQERPVDPVVKLFNTYSGLLSDNNMGVRKCLTPGDDTLI  
YIAYRNSDFKQNTDATALYFLDVIDSEILYLNTSNLVLEYQLKVACPIGTLRSVDVDITAYTILYTA-  
DNIKKYKFIRMATLLSKHPVIRLTCGLAATLVIKPYEVPISDMQLLKMATPGEPESTKSIPSDVCDRYPL  
KKFYLLAGGCPYDSQTFIVHTTCSILLRTATRDQFRNRWVQNPFRQEGEYKQLFTFSKYDFNDTIIDPN  
GVAGHASFCTNRSSNQCFWSEPMILEDVSSCSSRTRKIYVKLGINAEGFNSFVLNCPGTSTPTYIKSDNV  
IIELPVGDYGTAKLYSATKPSRIAVFCTHNYDKRFKSDIILMFNKHGFPFWTMTGSATGRDRMFTELSKM  
PFRSRYCNRRRSG----  
CYAGIPFHEDSVETDIHYGPEIMLKETYDNSIDRVITKSKTHFPSPISVKFMADNLGNGYDNPNSFWEDA  
KTKRTYSAMTIKVL PCTVRNKNIFNGDIISMYAQSSQDYGDGTYTFKSVTRSDCESSLDLASKVTVTCP  
AFSIPRNISTYEGLCFSVTTSKDHCATGIGWLKSNYGGKEDADKRSCYWISLDYYCSYDWKS-  
TWPDYDPCKSYIIIEYRDTWIESNVLQPPYTFEFTHDNSNEYVDKEISNKLNDLYNEYKKIMEYSDGSLPA  
SINRLAKAL TSEGREIASVNIDGNLLDIAYQADKEKMDIQTRINDITRDLFMHTLSDKDIDIIEEGKRC  
CIIDKNNRVKYPIDNYLCGLDDYIYVEYNKSYVLVNDTYMSYDYL SGIVVLSCYETIISLDTKDAKDAI  
ENEIITSAVAEALNDMFKEFDNVSAIIIKEEDNYLNS

>u1\_Yokpo345107192

HILCLIIISIVSNYNTCMRKALYHDLTDKDNVASLPKYLQVVERERSLLATFNWNTNIANNVKEFIKQCN  
INGTYNYNTINMAIKQSSLSKILGVNESEMYLSDNTVKNMVDNIGFLINNCYNVSVSDVFITLKEILT  
LTGTSTSNFTVSSDISCLKTLINTDYITQNISVISNCDKCSIDLMTSVIPVVDEFNNTLKGKLTNTNKYY  
CKLTTNTCDELILDDINNTTIMR-TTENKRKKRDLSTDELDCLYKSYGKDDISCPKRKSDKVN----  
MSVIAKQDLGIHSVIPTSKTHLQVGASGSIDGVIGDSSPFQNVKSRASIAEKIMPLPITSENDLATINKQ  
KNIKKSFTELTTIQKSTVRPKNKQYSDIYTPVK-RDSEIDTVEYNK-----SRRESSFEDDTVEYKN-  
NAKGIPDPLITKRTDYSILPNTGSSITPRRGITPP-----LSSNAPPDVNAPPENKGFK-  
VRCRRSISVGLARPDTYLSEHYEENNGSKNRI---

QKKYTSSMTKISKTFDKSAFGSAMPLLAGQAVNQIRSNVLTKKDNKDEKIFEAVSMGLSTIGSTLTVGL  
V-  
SPPLMIAGIGISIIISGIIDTVKDIYYLFSGGYKPEDPVVKLFNSYYGLVSNMNMGVRCLTPGEDTIIYI  
AYKNSDFKPNMDTMALYFLDVINSEILYLNTSNLVLEYQLKVACPIGTLRSVDVDITAYTILYVS-  
DNIKRYKFVRLATLLSKHPVIRLTCGLATTLVIRPYEVPISDMQLLKMSTPGEPESTKSIPSDVCDKYPL  
KKFYLLASGCPYDSQTFIVYTTCSILLKTATWDQFRNRWILQNPFRQEGTYKQLFTFSKYDFNDTIIDPN  
SIPGHASFCTNRTSSQCFWNEPMILEDVTSCNSRTRKIYMKLGTQSEGFNSFILNCPGTSTPTYIKNNNF  
IIELPVGDYGTAKLYSSTKNIRLAVFCTHNYDKRFKSDIILIFGRSSVSFSSITNSVTGKKNMFMKFSKF  
PYRSTFCNRRPGCYAG----

ITFNEESVESDIHHGPEIMIKETYDNSMDQIITKSKTHFPSPLSVKFMVNNLGNGYNYPDSFWKDAKDGR  
TYSSMTVKILPCTMRNTNIF-  
GPIISMYLQSSQDYGSNNIYRFKSESHQDCESTLDLISKITVTCPAFSIPRNISKYEGLCFSVTTSKDHC  
ATGNSWLKSRGYGKDDAKKRFCFWVSLDYYCSHDWSF-  
TYPDYDPCKSYIVEYRDTWIESNVLQPPYTFEFIHDNSNEYVDKEISNKLNELYNEYKNLMEYSDGSLPA  
SINRLAKALTAEGREIASVNIDGNLLDIAYQADKEKIDIQNKINDITRDIIFIHTLSDKDIDIIEENKCC  
CIIDKNNHVKYPIDNYICGLDDYIYIQHNTSYVLVNDTYINYDYLSGIVVLT CYETIISLDTKASKDAI  
EEEIMTSAIAEALNDIFKEFDNVSIIMIKEEDNYLNN

>u1\_Canvi40556072

KITIIIIIVILSHGKSCVKRSMYHNNEQVDFKAEAIKYLEIAIKENKVFSEFDWSNISHSVEYFLNNCI

KNTHYYNYDYVIRISSKAIQKFTMVKDIQHRKN--  
NNKFTMPMEYVKYNSPCNNVTIGSVINFTINLVTFEGISIQYPYMDSDFCITSIILCSVTVIKKTIVG  
HCENTSISLMADTMNPPDEYLEVLKSLQDETRLFYCMSSNDCLNYILEETS DYKLSPYHKSSSRSKRSI  
LEEDLDCMYENYSGTEYSCKEKRKKKREKEENDDEYIAKHLGVQQILPSSASHIQVGIYGDGSGVLGDGA  
IIDRLSLRARQFSQYMPVPIGTPQNISELEKVKSSSRDVMASVANKRSVKRSDLSDSSETNIDNKGNS  
RIKEISYKS--KGNTRQRNFSSTSIPSSQSRSLSSLRRLNCGTYGSNACALLGVPKH-  
KVTGFNEIRSSKIQKKGTSVDRNTLGQNVGDTFSTSVDSARIGGSGGVSSDVVYQSHANE----  
RRVYREKMOVETAKKFDKTSLLTATQLMVQGLISSRMRAEDLKKADGESEIVFEAVSASLSSVGNAMLAGM  
VASPNVALAGMGLSFISGLLDLGHLYNLLSGPKPEDPLVKKFNQYSEIVADSNMGVRTCLMPGSDMVI  
YLSYRNDTFKPSLESLNMYFIDVLDVSVVYLLNTSNVIMDYSLTIVCPIGYLRSPDIDVNAYVNLKTR-  
EDVRFYQVTRLGAMLSKSPTVTFTCGKDITLTLKPFVPLSSMQLLKMATPGEPDETIPSINVCDLFPL  
KNFYLLVKGCPFDSKIAIAYTTCSVLLRMSVWESEKQRWLENPFQKSRFKQLFTFSKFNFNETIIKPN  
EVPGHAKFCADRQSNQCHWYDVMVLDDITSCQTRSRIYVEIYFGNRGFTSFVLTCPGSGSTPVAVGKKG  
IIELPFSDLFTVKMFASVKKSIGIFCINDYDTRYRSDMILRFVEPNFPKDALLNTYDQGNKIENGLVMT  
PYRSRTC-

SLSKECTSFHHRIDVWSPNYVVDIDVGAELMITEKYDESATENIEKSKDFFPHKLKLDYLSKIGSVYDQ  
ADRFWSDAKKRTFSSILIVLLGCDIRKNIY-  
NDRISMYHQYGDNYGDSKKYKFNRLSGSSCSAELDLTKVSIKDEF SINRYLKGYEGLCAVTITSKDHC  
GTNWD DIKTFGYSSNYANSRRCQQTHPDNYCGRIYQHYHHPKYEPCRSYMIYYTDTWIEKEVLNPPYAFN  
FKYDTNNEYVDGMLSSKLRDLKAYKELYEYEGTLPKINRLANAL TPEGRQITNVEVDSNVLEIAYLA  
DMEKMELENKIKDLSKEILVNTLSDDDLEIKERYDSCCLLDSQNTSKVYPMSNYTCGIYDFIYNTTNT  
MVLINDTYMNYDMFSGARVVTFCDSIPLTINSSKNEVQNLLLLHSVERGLDSLMMELDNISSILLDNII  
TYE-

>u1\_Fowvi9634777

-  
YKYIMYAFIHDSKTCMKNPMYHSNEQDTKAEALKYLELAEKEKSLFMGKFDWEKIRKEVKDYKTKCIK  
KSNYYDYSYVLRVGTKTLIQQLTTANSIEVT-  
TSSGSFKIPIDYVKYENPKCANNVTISTVINFSVDIINFNGVSVQHPYMDSDFCINKIVSCSISTIRKTL  
TGNCDHASMSLMAEVVTPPNSYLNINSIKDVTRLFYCMLENDCSNYVLAATAVAKLSSYYTKGNRHKR  
DTLDEDELCMYEAYRGTEYTCKAEIASRKKINTDDDETMARYLGVDGVI PDRVSHIQGTIHHGNDGIIGD  
GQLISRLSLQARQFAPYMPVPLDTPYSIDVLRRTSPPSKNVIAVSVANKNSVLKILTEGDGKQSKATKG  
SDTMKEIDFRDTGGELYNQSLMVDTT SIPRHSFGRDSTMQTNI ED CGKFGNTACALLGVP GKNNVKHNT  
IIDKLRNKTPPSRGKENHERSQVSRVSWISNIDISLYSRTSTRLSESQGDSSDESSKS-  
KVYREKMIETAKKFDKALT SATQLIVQGMISARIRNENFNVDNEAETIFEAVSASFSSVGNAMLAGII  
ASPTVAFAGMGLSFISGLLDLGNHLYQLITGPKPEDPLVKKFNQYNELVSDSTMGVRTCLMPGSDLVIY  
LAYRNSDFKPSLEKLNLFHIDVPESIVVYLLNTSNIIMDYSLTIAACPIGYLRSPDLVNAFVTLKVT-  
EEVRFYQVTRLGAMLSKSPIVRFTCGREVTLTLKPF EIPLSNMQLLKMATPGEPEESKSMPSNVCDLFPL  
KNFYLLVKGCPFDSKVAIAYTTCSVLLRMSIWEENRRWLENPF DNKNR FKQLFTFNRFNFNDTVIKPN  
EISGHAKFCANRQSNHCHWFDVMDLDDISSCENVRKIYVEIYFGSRGFTSFVLTCPGSGSTPVAVGKKG  
IIELPFSDLFTVKMFASVKKTNIGVFCVNDYDTRYRSDMILKRFVEPNFPKDVLLD TYDQGNKLFNELVNM  
PWRRTCNI VGSKSCISFHGRIDIWNPNYVVDTEIGSEIMITEKYDDIATSSISKSSHYPYKLQLKYSL  
SGLGKVYDTADRFWQDAKKKRTFSSMLIVLPCNMIQNIY-

SQRISLYQQATNKYGDGKKYVFTTSGSKCTAELDLTKLSLQCEEFSLPRTL PQYEGIC SITISSKDHC  
GTTLDSSKYRGYSSSHANTRRCYPSVPDNYCGYSY--  
YPPQYEACKSYIIYSDTWIEKEILDPPYAFNFKYDTSNEYIDSTISGKLRGLYQAYKELYEYTDGTL P  
KSINRLAGALSDKGRDIASVNISSVLEVAYLADMEKMLEEKIKDLSKEVLISTLSDNDLEIIEKQYGM  
CCLLDKLNLSKVYPNCNYTCGLDDFIYGNTEITVLINGTHMDYDMFSEASVVTCLDNVIPLSIGARSE  
VEKNILLYSIELGLGSLMEELDNISSIMLSNNITYID-

>u1\_Pigvi659488480

MKYMIIIIYTFIRNTKTCMKHPMYHAQEQTDTKAEALKYLLAEKEKSLFMAKFDWEKIRKEVKDYKSKCT

KKANYYNYSYVLRVKGDKSLIQRLTTTDDSEYITTRLESFKIPIDYVKYENHKCNNVTISTVINFSVDIIN  
FKGVSVQHPYMSDFDCITKIIISCSISIVKKTLTGNCEDTSMMLMAEVVTPPDSYLSIINSIPDITRLFY  
CMLENNDCTNYILAATTMAKLSYHKKGSRYKRDLIDEDLECMYEIYNGNEYSCKSETLSRKKINTDDDE  
SMATYLGVDGVIPERASHIQGTGIYGGDDGIIGDQIISRLSLEARRFSPYMPVPLDTPGSIDILRTTSSP  
SKNVIASVVKASVLKILTEGAGTKQAKATKGGGAMKEIDFRDRGGELTKQKSSFNTTSIPRSSFRNDS  
NLRTVNIINECGFRGNTACALLGVPSSENKNNHTIVDKLRNKTQPSKGKENHQRSQDRLSNGDMDLSSYTT  
RHSRGRLESQGDSSDGSSQS-

RVYREKRVETAKKFDKTALASATQMMVQGMISTRIRNENFKNVDNEAEAVFEAVSASFSSIGNAMLAGII  
ASPTVAFAGMGLSFISGLLDLKGHLHYLISGKPKPEDPLVKKFNQYNELVSDSTMGVRTCLMPGSDLVIY  
LAYRNSDFKPSLEKLDLHFIDVPESIVYYLNTSNIVMDYSLTIACPIGYLRSPDLVNAFVTLKVT-  
EEVRFYQVTRLGAMLSKSPIVRFTCGREVTLTRPFEISLSNMQLLKMATPGEREESKSMPSNVCDIFPL  
KNFYLLVKGCPFDKSVSIAYTTCVLLRMSIWEENKRWLLNPFDNKNRYKQLFTFTKFNFNDTIIPN  
EVSGHAKFCANRQSNHCHWFDMVLDLDDISSCENRVKRIYVEIYFGSRGFTSFVLTCPSPGSTPVAVGNDG  
IIELPFSDLFTVKMFASVKKTNIGVFCVNDYDTRYRSDMILKFVEPNFPKDTILDYDQGNRLFNDLVNM  
PWRRTCNIIVGSKSCISFHGRIDIWNPYVIETEIGSEVMITEKYDDLATSSLSRASDYFPYKQLQFKYSL  
SGLGKVDNDDRFWADAKKRRTFSSMLIVLPCNMRQNIY-

SQRISLYQQATNKYGDGKKYMFSTLGSKCTAELDLTKLSLQCEEFSLPRTLPOYEGICISITISSKDH  
GATSDSAKSKGYSSSHANTRRCYPSIPDNYCGHSY--  
YYPYQYEACKAYMIYYRDTWIEKEILDPPYAFNFKYNTSNEYIDSNISGKLRDLYRAYKELYEYTDGTL  
KSNRLAGALTDKGRDIANVNIIDSNVLEAVYLADEKMQLEVRKELSKVLEVLVSTLSDNDLEIIEKQYGM  
CCLLDKLNSTKVYPNCNYTCGIDDFIYGNITETTTLINGTHMDYGMFSEASVVTCLDNIIPVSI SARSE  
VEKNILLYSIELGLGLMEELDNISSIMLSNNITYIE-

>u1\_Canvi40556093

NMKEITISVMFVENDSCLRKSRYHSNKELDHKAIAARYLKIARAERERFHNCFNWKHIREKIKYFIKMG  
TYSVYYNYTYSLCINGNSSTVLSLKENIHNCETRNVTCSVPVSDVTDNNKCKNITVDKVINFTMTIVT  
FKGVSSPPYESSNFECVKHMLNCGQLIMTSKLNNCNDCHMSLMVDVVPVDFEFTSLTGGLDKASLFY  
CEVTGGDCINYIINDIKSSKLHNYRSKRDTNDYNTINNHLDCMYKMYDGEEDCNDRKSNHERRVRYNF  
LIKDYLGID-

NVIQDITHLQVGMYYKHKHGISGDGEIINNLKDMIKSFRTYMPISSGSPKDINILDVIPLKGNVSSLSIA  
RKESIRKKHIFTKD-LDNLERNKNSYFKDIAYKKSGGRVATEKLGVK--  
SIRPRGRSSHYPYHAKYRCKRGIGAVCGLLSTNDSSGSSGNSSEL-  
GSSIMSQRTSSNHNSILSYNSILSRYSSTSSSRNSSGDSNDSSGRSSTGSNVSGSATDYGSKMVKISKLL  
DKTTF----

NLASQLLTSRLIDLQVRYSDNDRATAVAETVSASLESIGGVMASAGSLTSARLCFSGMGLSAIAGLIDAGV  
DIYHILTGKPRSPDPVIQTFNMYSRYMSDTASGVRKCMIPGTETLVYMSYRNSDFKQPLDKLSLYFIDTP  
DSVLMYLNSTNVVLDLDFSLTVACPLGHLRSVDVDITAYTTLKTNEEDGVRFYKFLSLGAMLSFPPTVRLTCG  
KDITLTLKPFVQIQDMQLLKMATPGEPEETKNMPSNVCDIFPLKTFNLLVRGCPFDSTITYITHMTCSIL  
LRLASWEPISKRWILESPFGKDNLDKQLFVFKRNFSDIIIPNLIQGHKFCVSKHTTECYWKDIMLLD  
DTSSCTARARTIYVEVYFDGRGFTSFVLTCPSPGSTPVAVGNDGVIELPIGDFYTSKMFASSTKEKIGIF  
CVDNYDSKFKSDLIIFVSQKYNDIIILDEYTGKERVFEFMAGMPWRSRKTWSHKRSCISYHGRIDIWT  
EDYIIEYTDIGPELMITEKYHDTINNSIEKSKLWFPSDLKIDYYISNLGKAYDDSNRFWKDAKNMRTYSSI  
VLILMPCTMRANMLYNSEASLYHQSTQDYSDGKKYLLTRVSGSNCFDELTRMSVSCEAFSIPRTIH  
KYEGICISITVTSRDHCASVEDDVKVSYSKEQANTRYCYPWDPDHYCGYSFRHYRYPKYEPERSYIVYYK  
DAWIEKVLSPYAFEFYTDKNNEYVNPRLSNLSKRLYEEYSSISEYKQVSLPSAINRLESLSNRSI  
TEVVVNGRILETAYKADTERLELERAISITSQEVIANSLSAKDIDIINKEK--

CCLINRDNISIKINTLSNYYCGIDDYIKDQIRPLILINGTLEDFNLLIGEPIVSCIETVIPINTEKIGNE  
IEETILLRAFKEGLEELMYEVDNISSILMKHNVSLSN

>u1\_Fowvi9634793

SLKGIIISILFLENESCLRKSRYHRNKETHKAIAARYLSIITRERERLHNCFDWKSIREEIKRFISMCD  
TRSNNYNYTYSLYINYKSAAALSLSKEDIYNCETHNVTCSVPMYAVTYNNDKCKNITADTVVNFMTIVT



FNGVSSSPPEPSNFECVKHILNCGQVIIDTKLTSNCHDCQMSLMVDVVSVPDEFKTSLTGGLDKASLYY  
CEVTGGDCTNYIINDIKSSKLRAYKKRRTKTKRDTINEHLNCMYNYDGEYECSDYKNRKLNRHRRKDI  
RLKNYL GIDSVILEDITHLQIGMYKKQKGISGDGELVNTLKD MVKSFRTYMPISSNIPKDVNILDIVPLD  
GRNV SALYIATKESIKTKHIFEED-LDKLENNKNSCFKDIAYKEYGGRVATKSLGVR-  
SIIPTSQQRSSVSSKSHKSI RCKRGIGAVCGLLSTRDSSSTPS-----  
GGSLTSQ-----

DSSYDNHTSGDTSGYSSVNL SSGSSTEGSYTDYGSNMDKIAKQLDKANF-----  
NLASQLLVHRLIDLQLRYNDDSVATAVAETVSTCLESMGGVMSAGSFMSTR LAFSGMGLSTIAGLIDAGV  
DIYHILTGKPRSPDPVIKMFNTYEEYISDTETGVRKCMIPGTETLVYMSYRND SFKQPLDKLSLHFIDTI  
DSVLMYLNTSNVILDFSLTVACPLGYLRSIDVDITAYTTLKTNE DGVRFYKFLNLGTM LSSFPTVRLTCG  
KDITLTLKPFLEVELRNMQLLKMATPGEPEETKTMP SNVCDIFPLKSFNLLVRGCPFDSITYIIHTTCSIL  
LRISSWDPAGKRWILENPF GKDP ELKQLFVFNQNFSDIVIKPNTVQGH SKFCANKHTTECYWKDTMLLD  
DTSSCESRSRNIYVEIYFYGRGFTSFVLSCPSGSTPVA VGNDKGVIELPIGDFATSKMFAST EENKIGVF  
CIDNYSDFKS DLIINFVSQAYNESVIIDEFTGRERVFEDMAGMPWRSR KCTWKHKRSCVSYHGKIDIWT  
EDYIIETDIGDEIMITEKYDGTIDNSVEKSKVWFPCDLKIHYIKDLGKAYD DSNRFWSDAKNMRTYSSI  
VLILIPCTMRANMLYNSDTISLYHQSTQDYGN GKKYILTRVSGSNCF AELELTSRMKVTCDPFSIPRTIH  
KYEGIC SITVTSRDHCATLEDDIKTSGYSKEQANTRYCYPWDPDHYCGYSFRHYRYPKYEACRSYIVYYK  
DTWIEKEVLSPPYAFKFTYDKNNEYVNP KLSNLSKRLYEEYRSISEYKQGS LPSAINRLESLSNGRSI  
TEIIVNGRILETAYKADSERLELEHAISITSQEVIANSLSAEDIDIINKDK--  
CCLINRDN SIKVDDLSSYYCGLTDYMYNDQIRPMILINGTLQDFELLIGEPVVTCIETVIPLRTKSIRHE  
VEEIMLLRAFKEGLEELMYEFDNISTILMRHNVSSLTN

>u1\_Penvi659488255

CIKEIIISILFLEND SCLRKSRYHSNKELDHKAI AARYLTIVTRELERFHNC FNWKLIREKIKYFINMCN  
KRSAYNYTYS LHINYKSAASLSL SKEDIYNCETRNV TCSVPMHDVTFSGDKCKNITVDKVVNFTMTIVT  
FKGVSSSPPEPSNFECVKHILNCGQVMLISKMASNCHDCQMSLMVDVVPVPEEFNTSLTGGMDKARLYY  
CEVTDGDCIN YIINDIKSSKL RAYTGKKIRSKRDTINGHLNCMYNYD GKEYQCPNYKEEKQRRRRKDV  
RFKDYLGIDSEILKGVTHLQVGM YKKQKGISGDGEIVNTLKDIVKSFRTYMP ISSDTPKDVNILDILPLE  
GKNVSSLSISKKESIKKKRIFTEY-LDKLENNKSNFKNIAYKESGGRVATESLGVR--  
SVKPTDVSGD TVYNTKSKSRCKRGIGGVCGLLSTHSS-SVAS--EINGGSITSQGN-----  
THSRHRGSSNSSRYGNVSRNSSANLSRSGSYDGGSYTDYGSKMDKMSKLLDKTTF-----

NLVSQLLVNRLMDLQIRYSDDTVANAVAETVSTSLESIGGVMSVGSF KSVRLGFSGMGLTTIAGLIDTGV  
DIYHILTGKPRSPDPVIKTFNMYEEFISDTEAGVRKCMIPGTETLVYMSYRND SFKQPLEKLSLYFIDTI  
DSVLMYLNTSNVLD FSLTVACPLGYLRSIDVDITAYTTLKTNE YGVRFYKFLNLGAM LSSFPTVRLTCG  
KDITLTLKPFV KL RDMQLLKMATPGEPEETKNMPSNVCDL FPMKNFYLLVSGCPFDSITYIIHTTCSIL  
LRIASWEPV GKRWILESPFGKNSGLKQIFV FQKRNFS DIIKPN TVQGH SKFCANKHTTECYWKDVMILD  
DTSSCAYRSRNIYVEIYFDGRGFTSFVLTCPSGSTPVA VGDKDGVIELPIGDFYTSKMFASTKENKIGVF  
CVDNYDSEFKSDIIINFVSQVYNGS IILDEFTGKERVFEDMAGMPWRSR KCTWQHKRSCISYHGNIWT  
EDYIIETDIGDEIMITEKYDGTIDNSIEKSKLWFP CNLEINYYINDLGKAYD DSNRFWTD AKSMRTYSSI  
VLVLIPCTMRSNMLYNSDIISLYHQSTQDYNGE KYILTRVSGSNCF AELELNSRMKVTCDPFSIPRTIH  
KYEGIC SITVTSRDHCASLEDDIKTSGYSKERANTRYCYPWDPDHYCGYSFRHYRYPKYEACRSYIIYYK  
DTWIEREVL SPPYAF EFTYDKNNEYVDPKLSDSLKRLYEEYRSISEYKRVSLPSAINRLESLSNGRSI  
TEVIVNGKILETAYKADAERLELEHAITMTAQEVIAHSLSAEDVDIINKQK--  
CCLINKDNIIRLDV LSSYYCGIDDYIYNDQIRPMILINGTLED FNLLIGEPVVSCIETVIPLQTKTMREE  
TEETILLRAFKEGLEELMYELDNISTILMKHNITSLTN

>u1\_Canvi40556092

-  
MDIIIIIFTIFIRSEFCRRKSIYHNKNETDYAATATGYLSIAKVHKEMFIKSLNWD SILASVKRFLAKCSN  
NKGFYNYTINITVGKKNVKTLLL YNNSMNFVND DRYFNLPMEHVS YFDNGC NNVTVDEVINFSVVIITF  
KGVSTHEPYTASDFECIRKIVECSKV KIDKSVISNCE SCTL SLMVEVAGIPEEFNTTLEGATGTSELLYC  
MMTNGDCIDYVPIEFQSTLLSSYKQNNHRVKRDAISED IRCMYSMYKEDEFVCSRSRSGTSEENDPIEVS

LKKIMRMEEVIPREATHLQLGVSTSSIQVAGDIDIRAKVKDRAKKLQNFLPIPADTTDEIDKINRSPEDS  
KNLSGLAITRKESVRLRSSGSEDGYAELQERRRDDLVEIAYRQKGGKVSTSDSTFDPTRKIIRSVDSTPT  
PDYPSHRRCKRGNTDVCAMLGRSEGNPNPPQDSIDQDSLGRQDAVGQSQELIYSPRSSRSHSSIDSMDLG  
DDYSSGVSGIGSADSASDGSTSRYSKMQKVSSSVDKAVFGLAIQTMSMNTINRQSRQLRIEQGFDDTEA  
VIEAVSTALSSVGTSMAGIVTSPYLSFAGMGLSLISGLIDIGKDIYYSLSGTTKPIDPLVRKFSMYNEI  
VADTATGVRKCLMPGSDLTIFLSYRSDSFMPQVEKLATYFIDTIDSVLYLNTSGIIVDFSLTVACPIGH  
LRSTTLDITAYTNLKTDEGIKFYQFVGMAAMLSKFPTVELTCGKDITLTLKPFVVKMTDMQLLKMATPG  
EPPATKKFPSNVCDLFPKMFYLLVKGCPYDSQTSITRTTCSILVKMTTWDDKNQRWVLENPFERNKHR  
QLFTFSTYDFNKTIKPNIEIPGHAKYCANKHVKECYWVDVMILDDITSCASRIPTYVEVYFSNAGFNSF  
VLTCPSGSTPVAVGNTSGLIELPLSDFFSVKMFASVEERSVAVFCVHNDDSRYSKSDILISFVKPAYQEEA  
VVDTYEGKRKLFDDLGVMPWRSRTCTWKQGRTCIGYYGKVTLPQDFILRVDVGNELLITEKYDTTVDMM  
LEKAITRFPYELDIEFSVKELGRSYDDPNRFWEDAKKQRTYSSILLLLPCTSRANIFYDNVVISLYMQS  
TNDYGDGKKYTFKHMEGECTATLDLSKIYMKCPMFTISRNIISKYEGLCFATITSKDHCAIKNDEYKKY  
GYPSNKADKRHCYPEDPGHYCGYSWNHYTHPEYEACKATIIHYVDTWIESEVLDPPYVFNFKYDKRNEYV  
DKELSDTLKTLYDDHLKLIERYDGLSKSINRLSEALTGEARSITDVSVDADLIEISYVADQEKVELEER  
IKETTKEVITSTLSDNDLEIFKNDDEKCLLDEKKLAKIYSEENYTCGLEDFRYEIDKQILLLVNNTFMS  
YELVTGMPVLTCFYTIVPLLPPTV-SEVEDSIILYAIEEGIQELLYELDNISVALLTSELSYTR-  
>u1\_Fowvi9634792

MDIITILIIIFIRSEFCRRKPIYHDKNETDYAATATGYLSIARIHKETFIESFNWDSILASVKKFLDKCSN  
DRGIYNYTVNITVGTKNINTLLHNNSVDFINETDRYFELPMEHISYSDSGCANNVTIDKVIKFSVIIIF  
KGVSTHEPYTDSDFECITKVNCGSKAKIDKSVINNCETCTVGLMVEVTDIPEEFYTTLKGATDTSELLYC  
MMTNGDCIDYVPTFQSTLLSSYKQYKHRVKRDIISEDIKCIYNYRKKDDFTCSSRSKETSEGHGNDMA  
LKKIMKIRDIIIPKEATHLQLGTSTTTQVAGDIDIRAKVKDRAKKLQSFPIPADTTDEIDKINRRPEDS  
QNL SRLAITRKESVRLRSSSTEDGYAELQERYRDNLVEIAYRKKGGKIS-  
SDPTFDTTVVPLRKYKNELGSSPSSRRRCKRGNTDVCAMLGRSEGNSSSAQDRIEATGRGHAEAIPKSQE  
LIYSPRSSRSHSSYDSSNLDDISGVGSSSRGVSVSLDTA-  
SKYSEKMKKLSSTDKAVFSLAIQTMSMNTINRQSRQLRIHEGFDDAEAVIESVSTALSSIGTSMAGIV  
ISPHLALAGMGLTLITGLIDIGKDIYYSLSGIKKPSDPLVLKFNMYREIVADTETGVRKCLMPGSDLTIF  
LSYRSDSFMPQSEKLATHFIDTIDSVLYLNTSGIIVDFGLTVACPIGHLRSTTLDITAYTTLKTDEGV  
KFYQFVGLAAMLSKFPIVELTCGKDITLTLKPFVVKMTDMQLLKMTSGEPPDTKTFPSNVCDLFPKMF  
YLLKGCYDSQTSITRTTCSILMKMTIWDKQWILENPFEDSNKHRQLFTFDKYDFNDTIKPNITIP  
GHAKYCTNRHIKECFWNDVMILDDITSCNSRVRIYVEVYFSNAGFNSFVLSVSCPSGSTPVAVGNTLGLIE  
LPLSDFFSVKMFSGTEERSVAVFCVHNEDSRYSKSDILVSVFKPVYPEDAVVDTYKGGKKLFDDLVMPPWR  
SRTCTWRQGRTCIGYYGKVAWPPDYILNIDIGTELLITEKYDSTVDMNLKKAITRFPYELDIEFSVSEL  
GRAYDDPNRFWDDAKKQRTYSSILLLLPCTSRANILYDNVVISLYMQSINDYGDGKKYTFRHMEGECT  
ATLDLTLKISMKCPMFTIPRNISKYEGLCFVTITSKDHCAIKGDEYKKGYPNSKANERHCYPEDPGHYC  
GYSLNHYTHPEYEACKANIIHYRDTWIESEVLDPPYVDFKYDKNEYVDKELSDKLTLYDDNIKLIERY  
RDGSLAKSINRLSEALTKEARSITDVLVDTDLIEISYAADQEKIELEEKIKETTQEVLTSTLSDLEIF  
KNDYKCCLLDEKKLSKVYPEENYSCGLEDFVYEHNDQILLLVNDTFMDYELVIGMPVLTCIYIIVPLVS  
AT-KKEVEDAIILHAIEEGIQELLYELDNISIALLTSELSYTQ-

>u1\_Canvi40556062  
NITTLCILITLYSEFCRKS SVYHDKEEDYTASALRYLYVATLQKKEFMSDFNWTNIKSTVKEFLRKC  
YIASYNYTVNITV--  
KAIKTLLLCNDTINFNTSSDSDFDIPVEHVSYPDNGCANNITVDEIIPFNVVIITFRGVSTHYPYKDSGFS  
CIMRKIAGSKSRINKVITSNCNECSMDLMVDVTDIPQEFTSFLKGATGESELYFCMMTGGHCIDYVLTSL  
QDKQLSNYKRRKTRGKRDLLSDDIKMYENYEDEMYDCNNKDTKSRSRGLSEDIAMKRVLGKDVIPKGS  
THLQVGISSKKEHVLGDHRVYDNIRSRDIRSNLPINEETLQLL---  
ENLPNDPKHVSGLAIMKKENVRVQTMESGLVVRPKKLGKLIKDIKYAMKGGKLRPMSTFKVTTLPSS  
KIGDEVPOKT--

HRRCKRSSQKVCGLLGIANNPNPNANRRGEGLFNRQGTPRMPQGHNSSSSSASEHIYIGLSGSESHGGR  
GGIRGGGGGDDSRSSSSYQRNMRKITSSVDKAVFSMALQMMSMNSISRQARLERMEKGFDDTDAVLESI  
STSLTTIGTSMAGIIASPHLAFAGMGLSLIAGLIDAGKDIYYFLSGISRPPDPVIQKFNMYRDIIVSDTN  
MGVRKCLMPGSDITVFLSYRNDSFMPQNEKLVTYFIDTIDSVLYLNTSGIIVDFGLTVACPIGYLRSPT  
LDITAYTKLKTTEDDIKFYQFTRLGAMLSKFPVVELTCGKDITLTLKPFVPIISDMQLLKMATPGEPNST  
KSIPSNVCDLFTMKNFYLLVKGCPYDSQVAITRTTCSILLRMAIWDDVKNRWVLENPFQNNRHRQLFTF  
QKFDFNDTVIKPNSIPGHAKFCANRQIKECYWTDVMVLDDITSCANRVRTLYVELYFSNRGFTSFVLTCP  
SGSTPVAVGNTAGLIELPLADFYTVKLFASSTEPKTVGVFCMHNYDRRYKSDIIVSFVKAKYSNDSVVDTF  
EGKNKVFNDLTNMPWRSRTCTWRQGRTCVGYGKVNVTDFLLDIDTGNELLITEKYDSTIDTNLEKSK  
LYFPYELNIEFVGTLMAYDDPNRFWLDAEKKRTYSSILLVMIPCTTRANILYKDEVITLYMQSTNDYG  
DGKTYKFTHIEGGECAELDIKTKITMKCPMFTIPRNISNYEGLCFVTITSRDHICALQSDDYKLYGYPKD  
KADRRYCHPTDPGHYCGYSYSYTHPTYEACRANIVHYRDTWIESDVLEPPYVFNFKYDKRNEYVKKEFS  
DKLKEYDNHKKLIEYRDGALPTAINRLASSLTTDGRKIDVNVDSNILEIAYEADEEKIELEEQIAKTS  
KDVLLNTLSDEDLDILVENDEKCCVLDKNNKTKLYPSENYTCGLDDFIYYDNEKMLLSVNSSFIDYSLAT  
GIPVLTFCFYTIVPVNTNTI--NNIESNLILHGMEIDAIQDILYEMDNITLALLSNNITLY--

>u1\_Fowvi9634767

YLITITLITATHYSEFCRKPVYHDKEEIDYAAVAAYLSKAYVQKEVFMKSFWDKIKKKIRDFLGECS  
DSSSLYNYSINVTVSNNVAKELLSQDDKTKYINDTSKDYRLPVEHITYKGSSCNDITVDEIGFSITIVY  
FKGVSTHSPYGDSDFKVMEKIGSNVKEKSITSNCEKCTMDLIMDVTSIPEEFYTTLEGAKDDTELFIY  
CMVTGNHCSDYVTNRSTEKSL SAYRRD IGRKRDTFSEALMCMYRKYEDDFSCCEVITDVRTKED--  
DDIGLKKILNLEEVIPKDAAYLQVGATSE--

KVIGDSSIYRDIKRKSRNLQGYMPIKEETLDMLAELEKVRKDTKNVSGMAILKKDSIKKRVIYQGENGYTR  
HENPKQPGVYKLDYVSKGGKLT-

SRSTFNITSTLSSENQDHHLRGYSIRKRCRRSSQGVCGILGIANTNNTPNQQEQNQRYAAVQGPHPAQN  
QIYQGISDSSDIETSRSYAGSHNANGGDGGSGGGDSSSNSYESNIRRIGSSVDKAVFSLALQMMTMN  
AINRQSRLERMERGFDTTDEILEAVSTSLTTVGTSMAVGIVTSPHLAFAGMGLSLISGLIDAGKDIYYFF  
SGVPRPLDPVQKFSMYRDIIVSDTSMGVRKCMMPGYDITVFLSYRNDSFMPPTTEKLATYFIDTIDSVLYY  
LNTSGI IIDFSLTVACPIGYLRSPTLDITSYTKLKTEDNVKFYQFTRLGAMLSKFFSTVELTCGKDSTLT  
LKPFEVPISEMELLMKSTPGEPEETKSIPSNVCDIFPMKNFYLSVKGCPYDSQVAITRTTCSILLMATW  
DDVRDRWVLENPFERNKSKHRQLFTFEKYDFNHTVIKPNIPGHAKFCANRQIKECYWTDVMILDDITTC  
NRARTLYVELNFSNRGFTSFVLTCPSGSTPVAVGDKDGI IELPLADFYTVKMFSSIKPRTIGVFCVNNYD  
KRYKSDMIVSFINPKYDNESVIDTYEGKNRIFDDLTHMPWRSRTCTWKQGRTCIGYYGKVEVWTPDFLLQ  
VDVGSSELLVTEKYDNTVDYNIKANLKFPELDFEFSVGNLGMAYDDPDRFWLDAEKQRTYSSILLVLP  
CTSRANILYKEEIIISLYIQSTNDYGDGKKYTFKHIEGGECAELDLKTKMRLKCPMFTIPRTINKYEGLC  
FVTITSRDHCAIQSDDYKKGYPKTTADKRYCHPRDPGHYCGYSLNHYTHPKYEACRANIIHYRDTWIES  
EVLDPYVDFFKYDKKNEYVDKELSDKLEKLYKDYTRLMEYRDGSLPNAINRLASALTNDGRSISDVVVD  
SEVLEIAYEADKEKIELEESIVQTTTRDVLINTLSDEDVEIFKESDEKCCLLDVNNSKLYPDEHYTCGLK  
DFMYTDDENTWLLVNGSFVDYDLVTGPIILTCFYTIVPLKQSVI-  
KDIEKNLLLHAIEDAMQDLIYDLDTISTSLIKNNITSLS-

>u1\_Penvi659488232

KIIITTLIAARSYSEFCRKPVYHDKEEIDYAAVAAYLSKAYVQKEVFMKSFWDKIKKKVRDFLKGCS  
DSSSLYNYSVNITVGNKVAKELLLQNDKTRYINDSTNDYELPVEHITYKGSSCNDITVDEIGFSITIVD  
FKGVSTHSPYGDSDFKVMEKIGCKNVKEKSIISNCEKCTMDLIIDVTAIPEEFYSTLKGANDDELFIY  
CMVTGNHCGEYVNNKSKEKSL SAYRRNRGRRRRDTFSEALMCMYRNYDDDDFSCENIITRVRTRGISDDI  
VLKKILNVEEVIPKDAAYLQVGATSE--

KVIGDADIYRDIRKRSRNFQGYMPIKEETLDMLYELDKVKRDTKKVSGIAILKKDSIKKREYQGMYSYTG  
YEGHERPSVARLDYVSKGGKLT-

SHSTFNVTSLSSENQDHHLRGYTIRKRCRRSSQGVCGILGIANSNNMPNQQEQDAGTVAQQSILQPAQN  
QIYQGISSTSSIDTSRSYAGSHNTSSIGGGGGGGSSSSSSYESNMRRIGSSVDKAVFSLALQMMTMN  
SINRQSRLERMERGFDTTDEILEAVSTSLTTVGTSMAVGIVTSPHLAFAGMGLSLIAGLIDAGKDIYYFF

SGLSRPLDPVVQKFSMYRDVVS DTS MGVRKCMMPGSDITVFLSYRNDSFMPKTEKLATHFIDTIDSVLYY  
LNTSGIIVDFSLTVACPIGYLRSPTLDITSYTKLKTEDNVKIFYQFTRLGAMLSKFSIVELTCGKDSTLT  
LKPFEVPISEMELLMSTPGEPEETKSIPSNVCDIFPMKNFYLSVKGCPYDSQVAITRTTCSILLRMATW  
DDVRDRWVVENPFERNKHRQLFTFEKYDFNDTVIKPNTIPGHAKFCANRQIKECYWTDVMILDDITACA  
NRARTLYLELNFNSNRGFTSFVLTCPSGSTPVAVGDKDGIIEPLADFYTVKMFSSIKPRTIGVFCVNNYD  
KRYKSDMIVSFVNPKYDNESVIDTYEGKHRI FEDLTHMPWRSRTCTWKQGRTCVGYGKVEVWTPDFLLH  
IDVGSELLVTEKYDNTVDSNIEKANLKFPELDFEFSVGNLGMAYDDPDRFWLDAEKKRTYSSILLVLLP  
CTSRANILYKEDIISLYIQSTNDYGDGKKYTFKHIEGGECTAELDLKTKIRMKCPGFTIPRTISKYEGLC  
FVTITSRDHCAMQSDDYKKGYPKTTADKRYCHPTDPGHYCGYSVNHYTHPKYEACRANIIHYRDTWIES  
EVLDPYVDFDKYDKSNEYVDKELSDKLEKLYEDYTRLMEYRDGSLPNAINRLASALTS DGRSIADVVD  
SEILEIAYEADKEKIELEESIVKTTKDVLTNTLSD EDEI FKE SDEKCLLDVNNSSKLYPDENYTCGLK  
DFMYTDDENTWLLVNGSFVDYGLVTGIPILT CFYTI VPLTQ NVI-  
KDVEKNLLIHAIEDAIQDLIYDLDSISVSLINNNITSIS-  
>u1\_Canvi40556063

QFLIILTLGIVEEEK CIRKAKYH SKKESDHKASGVKYL SIAKREEHRFMNCFNWT S IRNQVKKFLKYCTG  
LGRYYNYTYNVSDNKSASVLSL SKEDVHICKGSGRDCSLPVSSVTYTGKRCDNVTADKVVNYTVDIITF  
KYLSSYPYKDSNFACLSEMITCDSVKVTKQVISHCNDCKITLMADVTEIPEEFTKSLEGGLDKTELFYC  
EVSGGDCINYILKDMKSSKLDNYIVKKVRRRDAIDSDLTCMYQSYQTGEYNCNDTRNSTSRNRKDTLT  
LKSHLGVEEVIPSGSYHLQVGLYDKHKVVGDKIISL KDSIKKFATQMPVPSDTPEDLSIIRKSSKD H  
NSIFPVSIGQNSIKGNPVEDVKIERRINDPENKDYKEISYKQAGGEISNNSLGVG-STIPYGG-  
STYTRKLMVQHRRRRTGIMCGLLMTPNRAHVIRSDIMGSSVGD T-----  
GSVSSVSVANELDSGRASSSTYTSNGSGGNHNDSS EYGYTMSRISKTFDKVALSIAAQLITQGLMERNL  
RSRIEYGNDETTAIFDVVSTSMSTIGGVASGIIASP NLA FAGMGISSIAGLLDAGRDIYYILSGKPRF  
TDPVIKTFNTYRDY MIDTSTGVRKCMMPGTETIVMAYRNDSV VPSLEKLSLYFVDTIDSVL MYLNTSNI  
VLDFSLTVACPFYLRVLDLITSYTVLKTTEEGVRFYR FTRLGAMLS TFPVVRLTCGKDITLTLKPFV  
KLSDMQLLMSTPGEPEETKTMPSNVCDIFPMKRFYLVGDCPFDSMVS VHTTCSVLLRMATWEPAKNR  
WVLENPFDQGSFRQLFTFQKFD FNNTI IKPNEIPGHSKFCASRHATECYWTDVMILDDTSSCASRSRTI  
YLELYFYGRGFTSFVLTCPSGSTPVAVGDKDGVIELPLSDFYTVKMFAS TKPKKIGVFCVDNYSNFKSD  
FIINFVEQNISKDII LDEFTGKERIFEDVAGMPWRSKRCTWQYKRPCISYHGKIDVWTEDFILETDIGPE  
LMITEKYDSTVSQNI EKSKTLFPYELNVEFYAGNLGNAYENPGKFWDDASKRTYSSIVLLLIPCTMRAN  
MMYNSNIISM YHQSTYDYGDGNKYIFDRITGKNCAATLDIKSKISVRCEAFSIPRSIDN-  
EGMCFITATSRDHCAAETDDIKSSGYSKEQAVKRYCYPWDAGHYCGYSLRHYVYPKYEACRSYIIHYRDV  
WIENEVLMPPYAFEFKYSKSNEYINPKLSDSLK KLYEYKMISEYTNSSLTNSINRLSSSLTSHGRDITD  
VIVDAGVLETSYEASVEMLDLESKITDTAHSILMHSLSGKDVDIYKEEL--CCLIDKKDTVELCS-  
RNYSCGIDDYLYDDEDRLVILVNGTFEDYNFLVGD PVITCIDVVIPLHNKDTKSEVEEAIVMRAFKEGLE  
ELMHELDNISSIVLKNNISINM

>u1\_Fowvi41023385  
NIFMLIVLLFSYDENTCLRKAKYH SKSES DHKASATKYLSSV KKEEQRFSECFNWTNIQQT VKNFVKQCE  
LSTDYYNYTYDVSIDNKSASALS LSKEDVYICKTSNKTCSLPVSSITYTGKCRNITVDKVVNYSVDIIT  
FDGISSPPYESSDFECVTEMITCDKVRVKKILTGHCSDCRMGLMAEVTEVPNEFNISLEGGISDVNLFY  
CEVTGGNCINYILTDIKDSKLSAYKRRKSRPRRNAIDTDL ECMYLSYDDDRYDCPKNKKKKRKNRKYEHK  
MLKEYFGL EEVIPRKASYIQVGISGSEDNVLGDDDIISTLKDSMKSL EKMVTVPVETPNSISTISKIINS  
DGGTPGISISQKQSIKTSSIEEE--LDDIKDKRKEHYKDIKYSKSGGSVIVNPVGIGPKSIPESS---  
RPLPPPHSNRRCKRGLTSMCGLLMTPRTRPVPPSDLVSSSLGSVDDGGS-----  
SSSRDSSVSSSSRGRGGGGGNSSSGSDNN---  
ANDYGARMRISRSFDKTAVGLAAQFITQGLMDRNLRSFMIQDDDDAEVVFVVDVSTAIGTIGSVVTSGI  
IASPQVAFAGMGLSAISGLLDAGRDIYYILSGKQRPQDPVLKTFNAYRDYVTD TSSGVRKCMMPGTETIV  
YMSYRNDIVIPSLEKLSLFFVDSIDSVLYLNTSNIILDFSLTVACPIGYLRSPTLDINAYTVLKTSEDG  
ARFYTFTRLGAMLSKFPVLLTCGRDITLTLRPF EIALNEMQLLMSTPGEPEETKSIPSNVCDIFPLKR

FYLTVRGCPFDSMVSVVYTTCSVLLRLATWEPLYQRWVLENPFQNGRLRQLFTFQKYDFNETVIKPNEI  
PGHSHKFCNTHATECYWAELMVLDDTSSCASRSRTIYLELYFNDRGFTSFVLTCPGSGSTPVAVGDKDGI  
ELPLADFYTVKMFSSIKPRTIGVFCVNNYDKRYKSDMIVSFINPKYDNESVIDTYEGKNRIFDDLTHMPW  
RSRTCTWKQGRCTIGYGGKVEVWTPDFLLQVDVGSSELLVTEKYDNTVDYNIKANLKFYELDVEFSVGN  
LGMAYDDPDRFWLDAEKQRTYSSILLVVLPTSRANILYKEEIIISLYIQSTNDYGDGKKYTFKHIEGGEC  
MAELDLKTKMRLKCPMFTIPRTINKYEGLCFVTITSRDHCAIQSDDYKKGYPKTTADKRYCHPRDPGHY  
CGYSLNHYTHPKYEACRANIIHYRDTWIESEVLDPPYVDFKYDKKNEYVDKELSDKLEKLYKDYTRLME  
YRDGSLPNAINRLASALTNDGRSISDVVVVSEVLEIAYEADKEKIELEESIVQTTTRDVLINTLSDDEDVEI  
FKESDEKCCLLDVNNSKLYPDEHYTCGLKDFMYTDDENTWLLVNGSFVDYDLVTGIPILTTCFYTIVPLK  
QSVI-KDIEKNLLLHAIEDAMQDLIYDLDTISTSLIKNNITSL-  
>u1\_Pigvi659488471

SIFILVLLFSYDENTCLRKAKYHSKSES DHKASATKYLSSVKKEEQRFIECFNWTNIRQTIKSFVKECE  
LSTDFYNYTYDVSIDNKSASALS SKEDVYICKTTSKTCSLPVSTITYTGTKCRNITVDKVVNYSVDIIT  
FDGISSPPYESSDFECITEMITCDKVKVVKILTGHCDCRMGLMAEVTEVPKEFNISLEGGMSDVNLFY  
CEVTGGNCINYILTDIKDSKLSAYKRRKSRPRRIIGNLECMYLYYDDRYDCPKNKKKRRKSRKHEHK  
MLKEYFGLEGVIPKASHIQVGISSSKDSILGDGNIISTLKDSMRSLEKMITVPVDTPKSLSTISKI-  
NSDGDTSGISISQKSIK-ASFTSIEELDDIKDKRKEHYKDIKYGKSGGSVINPVGVPKTIPEPN---  
HSLPRTSSRRCKRGLTSMCGLLMTPRTRPVPADSDLLSSSLSSVDGGGS-----  
GSFRDDSSVSSSTSSSGTSSTSSSSSSSSTSSSSSGNSAYGSRMKRISRSFDKTALGLAAQFITQGLMDRN  
LRSFMVQDDNEAEVFDVSTAIGTIGSVVTSIIASPHVAFAGMGLSAISGLLDAGRDIYYILSGKQR  
PQDPVLKTFNAYRDYVTDTS SSVRKCMMPGTETIVYMSYRNDIIPSLEKLSLFFVDSIDSVLYLNSN  
VILDFSLTVVCPIGYLRSPDLINAYTVIKTSEEGARFYTFTRLGAMLSKFPVVRLTCGKDITLTKPFE  
IALNEMQLLKMSTPGEPEETKSIPSNVCDIFPLKRFYLTVRGCPFDSIVSVVHTTCSILLRMATWEPLYQ  
RWVLENPFQNGRLRQLFTFQKYDFNNTVIKPNEIPGHSHKFCNTHATECYWTELMVLDDTSSCASRART  
IYLELYFNDRGFTSFVLTCPGSGSTPVAVGDKDGIIEELPLADFYTVKMFASKNEKKIGVFCVDNYNSDLKS  
DLIIKFVSQRHQEGIIILDEYTGKEKVFEDVSGMPWRSRRTWQHKRQCVSFHGKIDVWTEYKLETDVGS  
ELMITEKYESTITQNKSATLFPYELKVEFYVGNLGNAYSKPERFWDATRSRTYSSIVLALIPCIMRA  
NMLYNSDFISMYHQSTYDYGDSKYTFYRIAGSECIAYLDLKSMSVRCEPFSIPRTINKYEGMCFIIVT  
SRDHCA TDVDEIKNSGYTKEQADKRYCYPWDAGHYCGYSLRHYRHPDYEACKSYIIHYKDVWIENEVLLP  
PYAFEFKYNKNNEYIDPKLSDSLKILYDEYKSIPQYTNSSLPESINRLSSSLTSEGRSITDVSIDGGILE  
TAFEANVERLELEEQITDTAHMVL TNTLSGDDLEIYDKET--  
CKKIDSDNTVKIIESGNYSCGLDDYLYDDEDRLVVLINGTLEDVFLIGKSVITCIDIVIPLLEDDDVKEE  
VEETILLQAFKEGIEEIMHELDNISSILLKNNITNINM

>u1\_Fowvi9634768  
NIFMLIVLLFSYDENTCLRKAKYHSKSES DHKASATKYLSSVKKEEQRFSECFNWTNIQTVKNFVKQCE  
LSTDYNYTYDVSIDNKSASALS SKEDVYIC-  
TSNKTCSLPVSSITYTGKCRNITVDKVVNYSVDIITFDGISSPPYESSDFECVTEMITCDKVRVVKILT  
TGHCSDCRMGLMAEVTEVPNEFNISLEGGISDVNLFYCEVTGGNCINYILTDIKDSKLSAYKRRKSRPRR  
NAIDTDLECMYLSYDDRYDCPKNKKKRRKRNRYEHKMLKEYFGLEEVIPRKASYIQVGISGSEDNVLGD  
DDIISTLKDSMKSLEKMTVPVETPNSISTISKIINSDGGTPGISISQKSIKTSSIEEE--  
LDDIKDKRKEHYKDIKYSKSGGSVINPVGIGPKSIPSS---  
RPLPPPHSNRRCKRGLTSMCGLLMTPRTRPVPDSDLVSSSLGSVDGGGS-----  
SSSRDDSSVSSSRGRGGGGGNSSSGSDNN---  
ANDYGARMRISRSFDKTAVGLAAQFITQGLMDRNLRSFMIQDDDDAEVFDVSTAIGTIGSVVTSII  
IASPQVAFAGMGLSAISGLLDAGRDIYYILSGKQRQPDPVLKTFNAYRDYVTDTS SSVRKCMMPGTETIV  
YMSYRNDIVIPSLEKLSLFFVDSIDSVLYLNTSNIILDFSLTVACPIGYLRSPDLINAYTVLKTSEDG  
ARFYTFTRLGAMLSKFPVLLTCGRDITLTLRPFIEALNEMQLLKMSTPGEPEETKSIPSNVCDIFPLK  
FYLTVRGCPFDSMVSVVYTTCSVLLRLATWEPLYQRWVLENPFQNGRLRQLFTFQKYDFNETVIKPNEI  
PGHSHKFCNTHATECYWAELMVLDDTSSCASRSRTIYLELYFNDRGFTSFVLTCPGSGSTPVAVGDKDGI  
ELPLADFYTVKMFASKKEKKIGVFCVDNYNSALKSDLIINFSVQRVQEGIIILDEYMGKEKVFEDVSGMPW

RSRRCTWQHKRQCISFHGKIDVWMEDYNLETDVGSSELMITEKEYESTITQNINKSATLFPYELKVEFYIGN  
LGNAYSKPERFWDDATRSRTYSSIVLALIPCTMRANMLYNSDFISMYHQSTYDYGDGSKYTFYRITGSEC  
IAYLDLKSMSVRCEPFSIPRTINEYEGMCFITVTSRDHCATDIDDIKNSGYTKEQADKRYCYPDAGHY  
CGYSLRHYIHPDYEACKSYIIHYKDVWIENEVLLPPYAFEFKYNKNNEYIDPKLADSLKLYDEYKSISQ  
YANSSLPESINRLSTSLTPEGRSITDVSIDSGVLEAAFEANVEKLELEEQIADTAYTVLTNTLSDDLEI  
YDEET--

CCKIDYDNSVKTVTSGNYSCLDDYLYDDENRVLILINGTLEDFDVLIQKPVITCIDIIIPLEDDDVKEE  
VEETIVLRAFKEGMEEIMHELDNISTILLKNNITNINI

>u1\_Molco9628967

CVPLVALLTILATEMACYRKGLYSLERTV-----

VSLDVSRLAEMETLQEGFHWDALRSNASAFRSACENTSTPVSYVVGTLTMTSETLTLVSGLVSSNFVP-  
SNARCLMAPTKITYN---

CENIPLSPTMTPPGNAADERPASTPAPLSTPAFATTLELASTGIVKSSAQSAACERADMETVLAVVGV  
TEYTEALRNLSDNKDYCCMLGSSCLRQVLHNMQNQKLT--RARRTRSLHDD---

NAHCLHRHFGGDHCEILRVRDPPIRRRPRKSLVVSESLGMKPVIGPGVQEVQLGAHGS--

SVVGS DGLTTSREQLRKVEQRAPLPTDMPDDLKARIR--

REGGGLQGCEAVYKESIRGRGTRGGGDESDPRSEDVEERQLKEIGPLKSSNSFEQDQVKKFRGGFDE  
WKLDGQGS PGD VVAPLETMSGDPGLDSSGPTFPD TVVAETTYV LGLQGGRRRGHGGQ-

ICKRSLDLGMTRPDSVHVESQGPLLGHHPANPGGMDTSSPRMKQLAREENRLKFLSAVSLSTYLSSAQ  
TQLREVMVQPPHGMVAVATMISSIVSTAGGTLAAG-

ASNPTVAAAGLALQGVGLIDIGTSLYYLIKQSPVDPVTEKFSTYARHMAQASAGARLCLMPDSDLRL  
TLAYRHS HFESA AEK GALAFADTPMTLVYYLRSQYIVYNTRVTVTCPIGTLRLLLEGDISAYAVLEVGEDG

ASHYALPGIMELLSNHPNASFTCGSEVGARFVFPDRELGDMQLLRVAAPGEPKETESIPSNVCDLFP  
LKR FYLLTDGCPHDSQTAITYVTCGTLRLMASWEPVRNRWVLLNPFSADEFIQLF TFSQYDFSGSTIRLHEL

DAPEAFCSQRVSSTCYWPEPMMLEDVTACETRIRKIHVELATGGSGYTSFVLTCPPGSTPFHV-

SNVSVVAIPQNRRTAVRYAATTQTSILVSCVHNTNPAYKSDIVLTFSTQGLRSRFSMEKWTQRKMLFDS  
SA-MPLRSRTCPEENTLC---

HLASVQQRAEYHLQVQTLPEQRLHEYYHGELDLTLQLTRTHFASDLHLRVDVSFLASAYRTPENLWKHAA  
KQRTFSAITITLYPCASVMGMFIKEQVLALYL--

TKDHGNGQNLTFHALDSRHCRAHLDIPEKVS LHCPLSLPKPFNDTDGICVVVTSSRDHCAVQSEEGVRE  
GYTSYEAETLSCYE-VRENF CYR LRIAH--

DYDPCSTAMLYAHVWLETRLVSPPYVQEFGYDPSNEYANRSLFEQLQDLQRQYEELLKHSSNPAVRMAN  
QLAATL TEEARAI FRINADS QLMQTA FEAD EERLELEARIENTMQDIFLNTMSYQELALRS AFSTRCCVL

DT--

SVKYFPLEHYLCGYGDYIVTAGEYRFL LINHTLVDEAYYTEQPWLT CYETLV PVSTEEQRARVEEALFLD  
ALESVLQDLFNRYDNLT VILHEEEDGGTSN

>u1\_Cowvi90660423

NLMLVALSRTVS---KCYRKG FYNLSSNSP-----

VSENYDYLKTEILNIDNNIPWKNITDSINNFIEKCNCSDTYNITI-----

LVNYSSDIVINKTGNTFINTVGNSISLNTLNITFISTNCEGVSVKATI-----

SITSEPVSI VDPFITLDLNCFSNTTCTNITSSTKYINSCVNSSLQIAAVRIPVLFNKTMQGITGSS  
EAYFCR-VTGNCDLSILNKS KNMRL---SKTPTRQKRSTEMGNHFLHKNY-

MDTIDCVNRVVKITRRRSPDVLVSMDELGARPRIPRSTTDIQVGYRGTGDSVMGDENIYETIRDNIYSVR  
DRVGLDSRRPTATTIIGNIEMTTANVIQVNVVDNYSIIPRLVIDSEPVTGIL--

PTGLYSEYKPSKRDYSTTPQALEYEPTTNDGRPKDSYVINIQRIVRRSSSSSDVTTMHGQKDELHRRNQ  
SDVRS GTYDVRDSGYDPSNAIRKGNKREQAVISSRTL NIRQSSGNRTNNNNNKVEDNKTKKNQRLSKL

AGKNNRMMMAAIAVSAQSSFTSARATAITDNTPKDQKIVSLVTTALSQVGGTLATG---

GTMGAIAGISIHAVSGLIDVFTSIYYIISGTQPPVPAIEKFSTYTQHMETKEAGSISCLMPDSQLTITL  
AYRHKEMNTEAERKRGEYTDIIPSKVYYLKNFSISYATVKLICPLGQLRLMEADVNTYATLIDK-

KGVKYYLVHGILELLSHHPTSTFTCGSEPGVIFTFPEQKLSDMQLLRLTTAGEPETTKDIPSNVCDLYPL

KRFYLLTGNCPHDTQTAITYVTCSTLLRMATYQENSNRWILMNPFTTEGENVQLFTFSKYDFSDIPIDVN  
KMLNAEAVCTQVDNGNCFWSEAMLEDVTQCASRIRKMYVTISVNIAGYNSFILTCPSGSAPFMI-  
SNSSISVIPMNTRRRTSMRFASANDAVALVSCMHNSNPNLKSDIILTFTSNRTMYNYKYNNKDKVHLFKY  
GSMVYRSTHCRLESENPKCK--

HHRIGKWKIEYRFTKHKLPMIRLTTNYHGELSAVVS KMKYFTSPINIKLDISDIDKVYDDPEVFWIFAK  
ERRTFS AISVTLFPCSVIAGHVINDGYAYFIGSEKPTHEKTIIFTYRKEHGDNCKVFIDIETKLIHCPE  
FTIPMPFNYYNLCVTMVTSRDHCAREHHWGGAWGYTSIQAHLESC-NHPFDNFCYRHWN--

YPPAYDACGSAMLGYAPIFVESRIISPPYIKEFVYDTSNEYASRTMYQKIKKLYNEYDRLMEMTSNAIID  
MSNAFGNALTDKGREIFRLNTDYVMLESLKEENKYKLALQNEIESTLNEIFIKSMTYDEISVLSAINTRC  
CVINT--

DVKYYPFEKYL CGYNDYIVVYDDERYLRINDTLINERTYSNPVVTFCFESLMSISEPEQREELESTLFTA  
ALEDVINELFTEYDNL TSELGKDEVEIEIK

>u1\_Tanvi146746631

MRLSFVIYIFLISKEECYRKGLYSFVTEISIFEDQTHFDVLNSEARIMESKINWTFMSQTLTKFNKCN  
SENNYYGGVLR LDF-----NLTLYDINYVNV TNEETYINL-NVTINTNECYGISYITDQ----

TILTSKPVSLFPPFTKANLTCIIYILNVTNLEVFNLTSKCTNITETMI-

YACGVPKEFNDTLNSV VNI SN NYFCKLNSDCGVSILDATETVENK--

KETSNRHKRSIVLYDSFCIHKNY-

LDNQECKNPVAKNTNKGKGNLLSAEEMGARP KIPTRTQNVQLGASGYDGTVTGLNNIYQNVKDTITNLK  
TLINILTDNPKHTLLTKDISSEADIARLKNKDVYSPLNKNIDSSSIYANSKVEDNDDIGNID-

NASREEIKRRNF DYAE TSSSDSTSSSYLENSSGSKEHIYEEIKEIYYKLGPNDRKPLPPNYKIDKNSIDV  
REDIDPNYNPLYKNEKIDYGVLDGPLYRGTVDPLEPLNKLNRARKNGNIDNKEIKLGKLTSS--

KINIISTVALTAYMSSSHSKISSIVAQSGPKEQTIVNLISSALSQIGGTLATG----

SSNAAIAGLAIQGIAGLIDVATSIYFLLSGEGPPV DPAIEKFSNYAAYVSKTEAGSRICMMPDSDITITL  
AYRHSEMND AEKTRGEYTDIIPSMIYYLKNSQISYNVKKVICPIGQLRLEADVNAYAKLIEDEKGVK  
TYIVHGILELLSYHSNVTFTCGNEPGAIFMPFEQDISDMQLLRISTPGEPESAKDMP SNVCDMYPLKKFY

VLGNC PFDSRKSVA YVTCGTL LRMSTYEPKQRWVLMNPF RYENDNIQLFTFKKYDFKSSYIDLNNIGH  
GDVICSQ TDSSTCYWSDSMILEDVTACASRIRKIYVDMSTTGKGYNSFVLTCPYGSTPFYI-

SNETIINIPMNTRRTSVRFASQKEATAIVSCVHNSNP SYKSDIIVNFRFSNLSSSYLFKYFKDRKYLFDL  
FSNMPKRSITCRVSENSNCKNYYYIDNIP EIDYKVVVTKLPTVRLTTSYSGDLNEALQKINFYSSPFTV

SIDADSLSDVYKNPDHFWKFAVEKRTFSSISV TMFACSVVAGNIVSDIFGKGYVYISKDSYDEKRITFNF  
VNDKDCSVYLDLDSRLKISCELP TVPKPFSSENS MCFLIATSRDHCASEEKWSKRLGYSY EESQTDSC--

TPSDNFCYY-

WYAYWPPDYDPCSSSMLGYAPV FLEDRIVNPPYIKEFSFNPNNEYVKRSLYEKLQNLNQNKLVL YSEN  
PVVEMTNSLAKYMTSEGREIFRLFANSDEM QKAKAKNEEQAVVRKEIEETISTIYLD TLYNDISLLSAI

STRCCVLDK--

SVKYFKLESYLCGYSNYLVTLNINYLKVNNSLIEEDVYLGTP IITCYESFIPVQSLDEQTI FESEIVKS  
AFEDA IKDIFDDYDNISINLSN NNNKIINN

>u1\_Yabmo38229295

-

MIKWIVFIFVVAKEECYRKGLYSFITEISISENQTQHFVDLNAEARIMESRINWTHMSHSLTEFNKCKS  
DN-YYGGVL-----ENLTLLEYDNSNNTFN-EETIYFLNTINI---TNECYGI----

SYNSYVVIILTSEPVSLSPPFMNTSFTCGIYILNATSLKIFTNLTKKCSNITETMI-

YACGVPEEFNNTLNSITNISN NYFCKLNSDCGVSILDATEIVENK--

KEVSSRHKRSIVLYDSFCIHKYYGDNQEDCKNPKAENTNKERKGNLLSAEEMGARP KI PRSARNVQIGAT  
GHDGSVVLNHIYQNVKSTITDLKTLIDMLTDNPFHTMLTKDINENIAKLIRKYVTPNIVINRNV DSSS

IYANSNINKHEDIYDINKNVTKKEIQRRNFNYAGTSSSDQ TSPGLKSKSPTSAHSLNNGPPGSYEDHIEE  
EPIPLPPSYKIDKNSIDVKLGTPNYPNLYPGNQSADYGVLDGPLYRGTVNPLEPLSKLRNARKNEIANN

KNTKFGKLSQS-NKMNIISTVALTSYSSSSSSKISSIVSQAGPKEQIIVNLISSALSQIGGTLATG----

SSNAAIAGLAIQGIAGLIDVATSIYFLLSGEPPV DPAVEKFSNYADYMSKSEAGSRICMMPDSDITVTL

AYRHSEMNTDAEKTRGEYTDIIPSMIYYLKNQISYNVVKVCLICPIGQLRLEADVNTYARLIDE-  
KGVKTYIVHGISSELLSYHHNVTFTCGNEPGAIFIPFEQDISDMQLLRISTPGEPESTKDMPSNVCDIYPL  
KKFYVLAGNCPFDSRKSVAIVTCGTLRLMSTYEPKQRWVLMNPFKYDHDNIQLFTFREYDFKSSYINLN  
DIGHGDVICSQTDSSCYWSDSMILEDVTACASRIRKIYVEMSTTGKGYNSFVLTCPYGSTPFHI-  
SNETIINIPMNRRTSVRFASQKEATAIVSCVHNSNPVYKSDIVINFRFSNLSSNYLFKYFKDRKYLFDL  
FSGMPKRSITCRVSENSNCKNHYYIKNIPEIEYKVVVTKLPTVRLTTSYHGDLNDSLQKINYYYASPFTV  
KIDADSLPDVYKNPDHFWKFASEKRTFSAISVTMFACSVVAGNIVKDVFGKGYVYISKDIYDEKKIVFNY  
VNDKACDVYLDLDYKLIKISCELVTPKPFKSKNSMCFLIATSRDHCASEEKWSKRLGYSYAEAQTDC--  
TPNDNFCYY-

WYAYWPPDYDPCASSMLGYAPVFLDRIVNPPYIKEFSFNPNEVYKRTLYEKLQSLYNKYNKLVLYSEN  
PVVDMNSLAKAMTPEGRQIFRLIADSDEIQKTAENEEQAIVRKEIEETISSIYLDTLKYDISLLSAI  
STRCCVLDK--

SVRYFRLNYICGYSDYLVLVNDTRYIRVNDSLINEDVYLETPVITCYESLVPVQSLEEQTDFENEIVKV  
AFEDAIFNEFDNISISLNKNSNKAINK

>u1\_Rabfi9633944

MYITLFIIVMIVSEEACYRKGLYGVNDTLVDK--

TTQNYENVIANAMLLESKINWTIIMSEVNEFAQNCSNSD-

YYNGRITFILYATPTPGYGNDSNDTQRLS--FNSSMIIFNITVVNNTCITTSIERVI----

IVATSYPFSTSPFIEKEFNCTLTNSACDNITVITEFLNECNASSPETKLYAVGIPNVYNEILNSVETNT  
VTYFCKLIGTDCGVGILERTTMLEAKAKAKSNSRHSRVIDDDAFCLHMRHGHHDVDCLPEEKPK-

ERSRNDLVSADELGAPKIRRTDTIQMGASGVDGPVAGSDQIYTDVKQRLETIKKLACTASRPPSTAL  
LEEIGKDITLILNQGITNPDRLFTSNVDTSSVYANIL--KNVSVSKVVVETYGSRDKPSSMSDS--

TYQPD-STQNKRPHERSEENYYESVNDLYALAGPTRRPPPIGNTKIDSASIDIR--

SDLTHNPIYPNQESKPKSGRNARRPGSDVERYEGPGNDYANVHGDGKSKTHKKHKKLSMGNDKISMIKAI  
ALSSYVSTSSRISSIMATAGPKELVIVNLLSSVLSQIGGTISTG--

NSPTVAVAGLALQGISGLIDAATSIYHILTGSQPYKDPKPAIEKFSNYANYMSRTEAGARVCMMPDSDITIT  
LAYRHTKMNTDAEKARGEYTDIIPSKVYYLKNNYISYAKVTLVCPIGQLRLLLEADVNAVATLIEETNGG

KYYLVHGIPELLSYHPTVFTCGNEPGVIFTPFEQKLDKMLLRISTPGEPEKAEDMPSNVCDLYPLKRF  
YVLAGNCPYDSRKSVAIVTCSTLLRMSTYEHKRWILMNPFKDEHDNIQLFTFKKYDFKDSLINLNEIG

YSDTVCSQSDTGTGYWSDAMILEDVTVCTSRIRKLYVKLSTLTKGYNSFVLTCPYGSTPFYI-  
SNGTIVDIPINTRRTTVRFAAQSDTTALVSCIHNTNAAKSDIILTFTVTEDTQSNYLFYFKYRRRLFET

FSDMPLRSKCKRYEENRRRCRNYHVKHIPKIDYKVVQMQLPMVKLSTSYTGPLNKTITKISSYYASPISL  
SIDVSSLNVYDVPHHFWKYAKEGRTFSAIAVTMFGCSVAGNVVNDVYGRAYIFLTKQSPSNRIAFDF

VYQTTCDVYLDLLTRLEIRCELTIPQPFNSPNSLCVLVATSRDHCVAENWDRTYGYSYSEAYTDSCEP  
-PIDNFCYY-

WHLYWPPDYDPCISAMLAHSYIFPDNKIVNPPYIKEFGYDPDNEYVDGTLYAKLQTLYEQYNKLVVEYSMN  
PMVGISNNLAAAMTPEAREIFRLEYSGSEMEMEITLNKRKAKVKGEIEDLLSDIYANTLTYSEAAMLSAI

STRCCVLNT--

GVKYFKLEHYLCGYDDYLIRIDNKTYVRINETIIPENEYTKIPRVTCFHDLIPITDEETQRRFEKMI IQT  
ALEDALTSIFEHDNATDYFV--NNSYIHN

>u1\_Myxvi408684627

RLFILIMIGYA-PEEVCYRKGLYGVDKTLVDK--

TMQNYENVIANAMLLESKINWTVIMSEVNEFVQNCSSPD-

YYNGRITFILGTATTPTPEVSNDTLLSF---

NSSMIIFNITVVNNTCITTSVERVVLVNDIVATSYPFSTSPFMEKEFNCTLTNLTCDNITIIITDFLNE  
CNASSMETKIYAVGIPNVYNEILNSVETNTVTYFCKLMGTDCGLGILERTTMLETKSKTKSSSRHARSVV

DEDAFCLHMRHGHHDVDCLPEEETQPTTRNRSDLVSAEELGAPKIRKNTDTIQLGASGTDGPVSGSDQI  
YADLKQKIETLKLTLGTASRPPSTALLEEIGKARSVSKIRQIDQOGATTSTVDTSSVYANVLTVTTGG

RDDYLEPRSSASSLERSSAVGGEDVGQYNSDGNPRRSRKYRENNYYESVDDLALAGPTRPNPLPNNTKID  
AASIGIR---



GDTRNPIYPNPGAKPKSARNARRPDSDLERYEGPGNDYANVNNNGTKTPKGNKHKKLSGGNNKMSMIKAI  
LSSYLSTNSRISSIMASAGPKELAIWNIVSSVLSQIGGTIAAG--  
NSPTAAAAGLALQGISGLIDAATSIYYILAGLQPYKDPKPAIEKFSNYANYMSRTEAGARVCMMPDSDITIT  
LAYRHSKMNTDAEKNRGEYTDVIPSKVYYLKNNYISYTKVTLVCPIGQLRLLLEADVNTYSTLIEENGA  
KYYLVHGILELLSYHSTVTFTCGNEPGVIFTPFEQKLRDMQLLRISTPGEPKEAEDMPSNVCDLYPLKRF  
YVLAGNCPYDSRKSVAVYVTCSTLLRMSTYEATKHRWILMNPFEDEHDNIQLFTFKKYDFKGSVINLNEIG  
HSDTVCSQSDTSTCYWSDAMILEDVTACTSRIKRLYVKLSTLGKGYNSFVLTCYPYGSTPFYI-  
SNGTIVDIPINTRRTTVRFTAQSDTTALVSCIHNTPAYKSDIILSFVTEDARSNYLFYFKYRQKLFNV  
FS-  
MPLRSKCCRYEENRRCKNYYHVKHIPKIDYKVMQRLPMVKLSTSYTGPLNKTITKISSYYASPISSLID  
VSSLSSVYDVPHHFWKYAKEGRTFSAIAVMTMFACSVVAGNVVRDYGRIYIFLTKRSPSNRIPDFVYQ  
TTCDVYLDLVTQLEIRCELTIPQPFNSPNSLCVLVATSRDHCAVTENWDRTYGYSYADAYTDSGCP-  
PIDNFCYY-  
WHLYWPPDYDPCVSAMLAHSYIFPDNKIVNPPYIKEFGYDPDNEYVDRTLYVKLQALYDQYNKLVESMN  
PMVDISNNLASAMTPEAREIFRLKYSGAEMETEITLNKRKAKVKEDIEDLLNEIYANTLTYSEAAMLSAI  
STRCCVLNT--  
DVKYFRLEHYLCGYDDYLVYIDNKTYVRINETVVPENEYAKAPRVTCFHDLIPITDEEAQRRFEKMIVQA  
ALEDALTSIFEEHDNVTDYFAIRSLQMANK  
>u1\_Myxvi539191144  
-HRTLFIILIMISSEACRYKGLYGVDTMDVK--  
TTQNYENVIANAMLLSRINWTLIMSEVNEFVQNCNSND--YNGRITFILNGPAVTTPGYGDDSDTQ-  
LSNNSSMIIFNITVNNCTTTsvervi----  
IVATSYPFSTSPFIEKDFNCTLTNYTCDNITIITEFLNECNASTPETKIYAVGIPDVYNEILNSVATNT  
VTYFCKLLGDCGLGILERTTLESKSKTKSRSRHSRVVDEDAFCLHMRHGHHDVDCIPEEEQPVKSRS  
RSDLVSADELGAPKIRKGTDTIQLGASGTDGPVLGSEIYTEVKQKLEALKLTRLTASRPPSTALLED  
IGKARSAASRIRQIDQGATTSRVDTSSVYANVLFVTSGRSDYTQPRSESSLQRSSMVEPEDDSTQQN  
DGDPRRSRKYSENYYESVDDLYAVAGPNRPNPLPPGTKIDSASIGIR---  
ADTRNPIYPNQDQSKPKSGRNARRPDSVERYEGPGNDYTNVNGTKTPKGTGKHKKLSSSNNKMSMIKAI  
LSSYMSTNSRISSIMTANAGPKELVIVNIVSSVLSQIGGTISAG--  
NNPTAAVAGLALQGISGLIDAATSIYYILAGSQPYKDPKPAIEKFSNYANYMSRTEAGARVCMMPDSDITIT  
LAYRHSKMNTDAEKDRGEYTDIIPSKVYYLKNNYISYAKVTLVCPIGQLRLLLEADVNTYATLVDDTNGG  
KYYLVHGILELLSYHPTVTFTCGNEPGVIFTPFEQKLRDMQLLRISTPGEPKEAEDMPSNVCDLYPLKRF  
YVLAGNCPYDSRKSVAVYVTCSTLLRMSTYEPTKHRWILMNPFEDEHDNIQLFTFKKYDFKGSVINLNTIG  
HSDTVCSQSDTSTCYWSDAMILEDVTACTSRIKRLYVQLSTLGKGYNSFVLTCYPYGSTPFYI-  
SNGTLVDIPINTRRTTVRFTAQSDTTALVSCIHNTPAYKSDIILSFVTEDSQQSNYLFYFKYRKKLFD  
FSGMPLRSKCCRYEENRRCKIYYHVKHIPKIDYKVMQRLPMVKLSTSYTGPLNKTITKIPLYASPVSL  
SIDVSSLANVYDVPHHFWKYAKEGRTFSAIAVMTMFGCSVVAGNVVNDTYSRAYIFLTKRSPSNRIPDF  
VYQTNCDVYLDLNRLEIRCELTIPQPFNSPNSLCVLVATSRDHCAVTENWDRTYGYSYEAAYTESCYL  
-PIDNFCYY-  
WYLYWPPDYDPCVSAMLAHSYIFPDNKIVNPPYIKEFGYDPDNEYVDRTLYAKLQTLYDQYNKLVDSMN  
PMVEISNNLASAMTPEAREIFRLKYSGSEMEMEITLNKHKAKVKEDIEDVLNEIYANTLTYSEAAMLSAI  
STRCCVLNT--  
NVKYFRLEHYLCGYEDYLFRIIDNKTYVRINDTIVPENEYAKAPLVTCFHDLIPITDEETQRQFEKMIIQT  
ALEEVLTDIFEEHDNATDYFA--ALQTVNK  
>u1\_Deevi62637523  
KSFIIICIFILQLEELQCYRKALYSFDASVIFKESSQNFDLFLKANELSKQINWTKIIDSISDFKSKCM  
NSSDTYNSVLIIFTLDIVYQTTNIIEDTNCNNTNKDET FNNSVTFITISNNTCDDVSIHITMNSQLIVT  
SDTISTNLPFLKSDFNCTLTIIINNEYVQRNRSKLNLCDSASMETKVQSIGIIDVYNQTLNSIINNTAAYY  
CVLSGTNCGIDIVEASKYLENQ--KQSKNRRKRSINMLDEFCLHRNY-  
LTSLECNNNKAVVKNRKRGNLVSADDELGAPKIRSRVKNIQVGAHGTGDSVSGSEEIYSNVKSEISEIK

RMVDTP-  
ERPSSTALIGSIQSESEHTKQIKQKDAYAVPNSDVTSSIIYTNLTDTVREEEDTFRGRLSGSEDMRPSSS  
TYLNKPRNSSQQNPSTLAHENDEHVYESINDVYSLAGPKVDRPVPPENKIDRSSINVRNSSDDTRNSLYT  
GSSIDDVIYLGHLVRAMKTQNTNEEITVEGNDDNNKEKTNKKLNELSVYDNKMKIVKTIALSTYLSSTN  
TRISSIMAQAHPKELTIVNIISSVLTQLGGTLAGG--  
GSPKAAVAGLALQGIAGLIDAATSIYFLLSGEPPKDAIEKFSNYASYVSQTDAGARVCMMPDSDITIT  
LAYRHNNMNEAEKVRGEYTDITPSKVVYLRNNQISYTVKITLVCPIGQLRLEADVNNYATLLEDKNGV  
KYYLVHGILELLSYHPNVTFTCGNEPGVIFMPFDQSLSDMQLLRISTPGEPYSAREMPSNVCDLYPLKKF  
YVLAGNCPYDSRISVTYVTCNTLLRMSTYDYEKNRWILMNPFRTNEDIQLFTFSKYDFKSDTINLNTIG  
HSGTICSQFDNTCYWADSMILEDVTSNSRIRKHLVELAVSDKGYNSFVLNCPYGSTPFHI-  
SNGSIIIEIPMNRRTSVRFLSQSEVALISCIHNSNPIYKSDIITFKKSDMSSKYLKFNFNDRKYLFD  
FSDMPKRSKTCRYSENKKCKNYQIKHPEIDYKVVVKTMPVRLTTSYSGPLNYTLANIRNYSSPIQI  
NLDVSSLSNVYKNPDHFWTFALKNRTFSSIVVTLFPCSVAAGNIVNDRYGRGYMFIKSDSPSNKRINFN  
VNSKLCVHLDLESRVKVSCEFTIPQPFDSNNSLCVLVTTSRDHCASEEAWSKNYGYSYEEENMNSC-  
GTPLDNFCYY-  
WYLYWAPDYDPCASSMLGYSPVFLNKLKPPYIKEFGYNPGNEYVNRDLYNRLQHLVDNYNKLVMYSLD  
PVEMSNEFAKSMTKEGREIFRLIADSKEIQTVRKENELKAKIRDEIEKTLNDIYVNTLTYSETELSSI  
NTRCCVLNT--  
DVKYFTLEYYLCGYDDYRINVDNKTYIKINNTLIEEDIYKIPQVTCFQSLISVNNEESQKNFETEIVRL  
AFEDVLNDFKEIDNKTYLFIIRNVNKINE  
>u1\_Shevi21492585  
NLFTMLIILIIYKLVCYRKGLYNFKR-  
SSFELNTKQDFDLKANAMALEQKINWMTLKEEVNDFKKNCTDSDNTYNGILSITFMTTTPLYLENKNN  
TDKVK-LMVSSIIILFENITIVNNTCIGTSIN---  
IYAKTIVTTDPLSTTPPFLT KSFNCTLT LNTTNNITIQTEFKNLCNESSLETKVYAVGVPEKFNITILNSV  
ESNSDSYFKIEDGNCEIDIMDATNNNEDSSKKSNTRHARSVHILDPFCLHMYHGDETIDSNKDMSTN  
RRRSPGNLQSAEEMGARPKIRKQTQDVQIGARGVDGPVSGSEEIYSQVRKELSQLKSLVGLTTTRPKSTA  
LIGGDVSSAAYITRIHQGDYSLPKSDVDTSSIIYANVLTVKTDSEFSDSFLKRSSSSDLKDDDSFR-----  
---  
KKDYSAGKSETGENIYESIREEYALLSPRNPPIPSTQKIDASSINARNTDVREDNPLYSSNSRRNAIKV  
NDDEFRTDEEPNATNNNNKNNDNEKIKKGRTRKLSKLD-  
NKINMIKTIAISSYLSSTNSRISSIMAQSNPKELTIVNIIVTSVLSQIGGTLAGG--  
GSPKAAAAGLVIQGISGLIDAATSIYFLLSGEQPKDAIEKFSNYASYVSKTDAGARVCMMPDSDITIT  
LAYRHSNMNVEAEKTRGEYTDIIPSTVYLLKNSQISYTVKVTLVCPIGQLRLLLEADINTYATLTEDKDG  
KFFYHVFHILELLSYHPNVTFTCGNEPGVIFIPFEQKLSDMQLLRISTPGEPREAEAMSSDVCDIYPLKKF  
YVLAGNCPFDNRKSVAYVTCSTLLRMSTYEHEKQRWILMNPFNNDNIQLFTFKKYDFEKDKIKLNSIS  
HSDTICSQSDTSTCFWADAMILEDVTSNSRIRKLSVEMSTSEKGYNNFVLTCPYGSTPFYI-  
SNGSIIISIPMNRRTSVRFASKHNNVALISCIHNSNPAYKSDIVVMFKQSNMSDMLFKYFKDRKYLFD  
FSDMPKRSKTCRASSENSCKNYYYIKHVPEIEFKVHVAKLPMVRLGTSYSGVLNQTLEKVNYFSTPISI  
SVDASTLSNVYKNQEHFWKFAMEKRTFSSITATIFACSVVAGKVSDYYGRGYIYMSKDFASNDKIYFNF  
IPDKACEIYLDLKTRVNVNCPPELTIPQPFDSLNSLCVLVATSRDHCASEENWRSYVGYSHYVDADSCNP  
-PVDNFCFY-  
WSAYWPPDYDPCASSMLGYSPIFTENRIVNPPYIKEFGYEPENEYVKRELYNKLQNLVEKYNMLVLYSMN  
PVEMSNGLAKSMTSEAREIFRLIANSNEMQKAKEENDMKAKVKMEIEETLNNIYVDTLSYSESSLLSAI  
STRCCVLDT--  
SVKYFDLEYYLCGYSDYLININNVTYVKINDSLIEEDIYRNIPQVTCFDTLVPIINNEEQKKFETEIVTM  
AFEDVLTEIFDEYDRMVSYFDISDDNNKN  
>u1\_Swivi18640217  
NVWLYILLTNVIENQQCYRKGLYNFSG-  
TTFNVNTPKNFDNVEANAKLLEKKINWTSIKEDIDKFVYNCTNDT-

KYNGI IYL TITNGNVTNMTYNDNATDYIN-IMESSTIIFS NITIMNNTCTIS IYSEVL-----  
VIATSDPFSTSPPFMEKEINCSII MYTTNMSQYRDFINSCETSS IETKAYAVGVTNMFNEVLNSIENNT  
DDYFCKIKNHSCGIGIISVITNYEIH--  
NTSHTRHARSVMTVDSFCEHANYGNERRVCSNTFLSMNTKMRGDLPSASELGARPKIRARIQKIQLGSR  
GIDGTVSGSEEIYEQVKNDLRSLQSI LGLTDSLPPK TALIGSIKHQSSSSIRSDIISHDDQIPSNTDTSS  
IYVNAIYKKQSNGH DVYFKDKSNSYQTNGDDYFVKS NYKKSDDVFKVSV P--  
SNNIYEEIGEPYSL LNPKR SNPLPKSSKIDSSS INVKDIIDKSQKPLTE-  
PSTDDEPTRNARRKNGDQSN NNNNNNNNDDE---  
YVRKTKKSGVENTDNKMKLVQTIAISSYLSTSNARISSIMSQSSPKELTLVNI VSNVLSQIGGTMATG-  
--  
SPKAAIAGLALQGISGLIDAATSIYFLLSGEEQPKDPAIEKFSNYASYMSMTEAGARVCMMPDSDITITL  
AYRHTKMNTDAEKTNGEYTDVIPSKVYYLKNQISYTVKVKLVCPIGQLR LFEADVNTYASLI EDKNGVK  
FYHVHGILELLSYHPNVTFTCGNEPGVIFMPFEQSLSDMQLLRISTPGEPKEAEEMYSNVCDVYPLKKFY  
VLAGNCPFDSRKSVA YVTCSTLLRMSTYEHERNRWILMNPFRGSEDNIQLFTFKKYDFENDRINLNEIGH  
GDSVCSQSDSSTCYWADPMILEDVTS CNTRIRKLSVSMATSGKGYNNFVLTCPYGSTPFYI-  
SNITIIDIPMNTRRTSVRFASYHKGVALVSCIHN SNP MYKSDIVIFFDTYNVND SYLFDHFEHRKKL FDS  
FS-  
MPKRSKTCRVS ENTNCKNYH IKNIPEIEYNVKVIKLPVRLGIGYTGTLDYILERIDTYFTTPINIKID  
MSTLSNVYKFP EHFWK FASQKRTFSSIAVTMFACSI VAGNI VNDRYGRGYVYVSKDVVGDDRIHFNF IKD  
KDCDIYLDLKSRLHINCPEFTIPRPFNNDNGLCVLVATSRDHCATEERWSKY YGYSEEAQT DSC--  
SPTDNFCYY-  
WYAYWPPDYDPCASSMLGYSNIFAENRIVNPPYI KEFGYDTSNEYVNRDLYNKLQILYDKYNSLIMYSMD  
PVVEMSNELAKSISKEGREIFRLILNSEEMRKTREENKIKAKVREDIEETLKDIYVNTLSYTEAELLSAI  
NTRCCVLNT--  
VVKYFPY EYLLCGYS DYIIHINNVS YVKINNTVIEEDIYRNIPQITCFKNILSIDNEENQRKFESQIVKT  
ALEDAISDIFEDYDNITDNFRIENIRYKNR

#####  
#####  
##### original B22R-like protein alignment  
#####  
#####  
#####  
#####  
>SGPV159

-----  
MLTLIFLLI V PANAWSNI-----SGKPEFSLEKTVESPD LKKG VVK-----  
LQVPWSVDVLDV LNKY-----DFDSVRPNV-----TDQI-----  
DLYHGI-----  
-----LDQCTDETHEDRLL-----LFWSTLQTSTKT-  
IQQLVNQLPV SLLK KCF TK-----  
-----  
DITYKTNKNTTEITTI-----KTEEYSGTFTKANLQTS-MDDPDDFYKFE-----  
QMKIIGGDPGKTTT WETLNKK-----  
-----  
--EDFMFNIKLIP-----VYTPMNYSDPMFYHNR-----SSPILENVYD--  
IWREYK KLY-----PAF-----  
VMDAIEKI-----  
DKAQSAH-----  
-----



GPLF-----ESEFRDSLLDHMLEF-----MTVSITQEA----  
VEKYISPKNSDDP-----  
-----EKINGLIRSEKFTN-----  
IGMELL----GKVVA--LLDSYNCTHGMHTTK--QIQFSTYTLAN--SQKYPR----  
VPNMTVDDRLSMTQLK-----RKSI-----  
NLCLVKNN-----  
GIP-----  
ESPITDNSRTL---KVAHP-DLTRNFASILFYFNGT-----IIE-  
DVSEFEETGKELIRNITRELL----DYVTE-SRNKDAMENM-----  
TATEEL-----VLRQLRYV--  
LKQKID-----  
-----  
KDVMQIGLE-----  
-----  
PLDH-----  
GGYVSLKE-----  
-----  
-----  
FFQASETSWRKDVWTHLKDNTGA--DRNLKIASVVFALSSVGSTMVIGG-AT-----  
MGPVVQGIGGGILGVLGQLGSTAITLFEMFKARP--DVRDINTEFWVNYKQFIDSPA-AGVRKCM-  
GGVDDNTHIQMAYRS--EMNDKA-----WMDAPKSIVVIQKNVISHDMSNLFVECF-  
SGKLRMTEGNIDAFSNLVMK--DGRQLRYV-DYSGLSKWDRVSLTCGKEITLEIE-  
FTEAHDHMMFLPGSRTGDSQGSWTSMSDVCMTDPLKRIGYTTL-  
GCKYDPLSTIRHETSCSLMYDMSVYDNIKHRFITVSGIFDNNQTSVKVFEFFPGQ----  
QNYTLDTTVDGQSKCLKVLNDPDTCHWPEMVTVRNTY--PNKVRI FNVKLGPD-----  
TKFGLTCTPGSQIDYNGTYCHLKQIGKETWEVEAGDCQVQCFAGKESDIF---  
RVTKTTKAATGFELTSRFGTNRQHVTDTDFD---  
ARTEVAMVKMNKFTVSTVVDVDFGENMISLRSGNNTWKDMVLSVYGCPGKSEEDGKCTHLM--  
NGTWT-----RKNVKYGFGEVSDSLTFEFENVKLVSSCSATVRLSDQLLTLACTIKDFDHS--  
VMVTLETGVFF-CDQDNQDRTCEMYNNGDVISSKVSQYVST-----LTTGK--  
LYGIISDVISGTQLLGNGME-----  
CMAGIKSMVNTLS-----GIKADNVET-----MIRNQIKTKCG-----  
HTLTMEGALPTGSWCCNSQASNNRPISW--KPVRIKFFDVIDLNKISY-  
TVDPVKIDQDVYQQILSLKQHVRDIENGMS-DLKTMS---  
EYSSNGIVTLVTMDQISDDYENHEMYKNEMVNKGLTKIWHGWLNITSTLTGQTWTDYVMERDYVCCGWNG  
TTQEVINIYGDKCEDTVFVYQ-TRVCGSEVCCPLTTTTFLG--CQKRSYQALSGQEQM--  
ALKQLFEKTDKIVRLNAVIKKNPLVRRITITSSGL-DTAITRVLRSQEQVDYDLLMAYN-----  
VTVATCVLLTLVFLVVLVVSICKSKKNTLVNHS-----  
-----E----SQVKL-----  
LT-----  
KSTASSMS-----  
SESSISGNKSMVTV-----  
-----  
-----  
-----  
-----  
-----  
-----  
-----  
-----









GNAHNYNLN-----EIITRHPEFKPARKYRRVSGPSLTVKSLTY-----  
LNCQKPINKTQQE-----ARKRTRRALLTVVDHTDETMLCAFQSGHHGEVGSDC-----  
THHNRRKRGLWD---RIKGNG-----NSGAGQPPPVDRTLKPGRVAVG-----  
PGTSGELIYSEINHHAIDTKARVDTAVTNVL-----  
KGQDFKTMSNDKLLDVMKKVKHQVNGGATTNMYDFRQK-----YGLG-----  
QSSDVVYSSLE-----GTASGGRI-----VTGYQA-----GGST-----  
YSMAGYGGAGGAAGGAGAAAGGAAGGGTYSMAGYGGETYSMAGHPQGGGGGAAYASVKNQRGMGGGMSMG  
DVYEEPPRYNARRDI-----DINERLTSHARDNNHMTTTSACGRRFKRDANAMCM--  
IRPEGNPFGGTADGLKAMDID-GDGKPDMLKAMDIDGDGKPDVLRIMDPD-----  
GDGHPGIGAGLMPPGPHIQMTG-G-----  
VNPMAVMAGGMMASMMATSLASNTRSIDNILSGKYAGVDKQLAVTLATMDKLNFEFGSMAMGGGMAAMM  
TMNPAAIAVAGVGLGLQMITSLVTFISIQHQLLYPTN--PPRDPILDKYMEYRKLMLADA-  
AGNRWCMPES--  
KLEVTLGFNRSVHLDGSRREDGKQTTALWAPAGETRIKVLNPLITFNAQLKVTCAGDGALRFNEFN-  
SKMARTRGANS-  
VGTSVWDVTQLASMVASEPVIHGRCGEATNLI IEREFISEADMILLQKRGPGEALTAAMPDVCDFPF  
KKF-YVSMPCSYPGEPHYGWTTCSMMFKRAIWNPNVNGTWMVNPVF-TPRGS DRKLF-TFSRRDFR-  
TYMPIKPNSDPQHKLCSNA-----

IKVS-----  
TTS-----  
-----

P-----  
TLNYS-----  
-----

-----C-----  
V-----  
-----

>Cyprinid\_herpesvirus\_131840165  
-----

MGRHKHELLWIEVLTL LLLCAAVASAGPPTFSLDEKFSEGERPKDSVCYVHNTMGASAMGNKAA--  
LSQVNL DVEVDSVDGLKLDGFYYDAESADESWSRVYKSI FDGGKQAIYEK FARDLILKSCDNLRN-----  
--TTYPMRSPDALPVQLTGEAAIGIGGLNNMGFATFNLTDMIFSFG-----

FDPDFIRK-----DDLKRAYVRARIILDAEKVAVYLNKTEVVVEKAV-----  
FDYKFRQGVTRGYSENLTYL RPMN-----QTFYTSPPPG---DDYCALVRFNYTIMI--  
ESIQGDYDNLILLDNIQRVITFNVGT-IPTGGKGLP-NIITECILKTKEYAND-----  
TCPENKLWFTSDD-----IYRESRNLRTK-----  
TSIAEVSPMPKTTKAPKTTTIVSMTINCTTPTNCTNCTAD-----  
CPNSYPNETVPEEVTVD-----YDCL-----QVEL----VKPIALPVTYDPEQDEIVFSL-----  
YAAVNRTFDYT-----VGKFNW-ETFCLARHI-----  
KAITNGDVYLTMYPYWRYMFDVAKY-----MKTN-----  
TEDASLLEEDL---KQ---NVFTLATLDVNTNRLKA-----DFFEMFKESH CNTWED-  
LALVISSKLYLDTIVAVSSAEKTA VSTLAVIQEMFDPYY-----TFRTVE-----RHKSLITN--  
GNAHNYNLN-----EII TRHPEFKPARKYRRVSGPSLTVKSLTY-----  
LNCQKPINKTQQE-----ARKRTRALLTVVDHTDETMLCAFQSGHHGEVGSDC-----  
THHNRRKRGLWD---RIKNG-----NSGAGQPPVDR TLK PGRVAVG-----  
PGTSGELIYSEINHHA AIDTKARVDTAVTNVL-----  
KGQDFKTMSNDKLLDVMKKVKHQVNGGATTNMYDFRQK-----YGLG-----  
QSSDVVYSSLE-----GTASGGRI-----VTGYQAGGSTYSMAGYG-----  
GAGGAAGGAGAAAGGAGAAAGGAAGGGTYSMAGYGETYSMAGHPQGGGGGAAYASV NKQRGMGGGMSMG  
DVYEEPPRYNARRDI-----DINERL TSHARDNNHMTTTS AQCGRRFKRDANAMCM--  
IRPEGNPFGGTADGLKAMDID-GDGKPDMLKAMDIDGDGKPDVLRIMDPD-----  
GDGHPGIGAGLMPGPHIQMTG-G-----  
VNPMAVMAGGMMASMMATSL SASNTRSIDNLSGKYAGVDKQLAVTLATMDKLN EFGSMAMGGGMAAMM  
TMNPA AIAVAGVGLGLQMITSLVTF SIQIHQLLYPTN--PPRDPILD KYMEYRKLMLADA-  
AGNRWCMPES--  
KLEVT LGFFNRSVHLDGSRREDGKQTTALWAPAGETR I KVLYNPLITFNAQLKVTCAGDGALRFNEFN-  
SKMARTRGANS-  
VGTSVWDVTQLASMVASEPVIHGRCGEATNLI IEREFISEADMILLQKRGPGEALTAAMP SDVCDLFPF  
KKF-YVSMPCS YEPGEPHYGWTTCSMMFKRAIWNPNVNGTWMV PNP-TPRGS DRKLF-TFSRRDFR-  
TYMPIKPNSDPQHKLCSNAIKPGLCRLPEVFGVEDTS-KCNKARFFRVHVAKPVNASLDGAI-  
QGYMMTCQPGSIASF-----I IKG---  
SPDNMHMLNLD SMGTARTFFLKDTEKEKAPVWIFCQHMSMPAFKSDI IELMLDDTD TAGQLVSLATDNY  
A--FSENWANSIM--FR-----ISRIGPRWQ-----YDI--PEDDE---NRIFLPEIKR-  
HIPMSDVVQMDI-NGNGENFDSKETFSF-KTEMSLHDLDDHF-----  
DDEVGRKWL DWAQRGCKATSSVQVNIGFCSTVKD HVEMDLVGWFRWGWVDEPWG---  
KGT LAVDTDSWVFKIPDGKDTLTLKKA-----  
KDPTSQEEEEKIKTMPDYTFTHKLKKNVYIDLKAGSLKIDCPTTDLTVNDLVST--  
TTGKRHTHMCVTVSPAKDSCAREKAACGTRTSEFADQKLKAYWEDMYKDPEWTM---  
YTPYWYCEGSEPRIGY YFCQDQGVRRNTLDGQTRSTVLVYQKMYDYTPPMT-KSYQS--ANRLGSD--  
DLVIEAAKYK--KMEEAHDAVGKIYDLINDPLVKAINS-----  
MASGLTAEGRQVARVNVPHDFVLQSDQQLAQIEILEEQVNELMMDLMV-  
DAL SASKWYEEQIFHIQKK--C-----CVLSL NDA--PSGSEQPW-SLF--VEALDP-  
MYAFFKCPLPRAFYLNYNETSGKIWGPQMTYETPDNIDQYLRSKSMRSWTVCLNNREIIFETEDI-----  
EKQFNKTLYEQI-----  
-----FERESVIELRKL-----ENAVEYG---  
INMTDKLNRQ-----  
SWFRRYNVYLGSAPELDDDEVETHHNRRKRAVTEGIRGATVYVESEISTEA-----  
-----IVVAAVVGTVILLCLIAIVFRIKNRRRRR---  
QQGSRRISKMTERGLAILGLRRRLDI AKALWGGKQAMELVLNDHVRLEKQFRRWAKGETYMLWSNAGVQ  
VEVEVDNEATNTCSTGTELEPKLMVSTANSPIVIRREQTYEDEMDDDDERSSDGAECIKLLDMSRSSVS  
INSQLRNTLSRGTEPPPVHKGAWNNKPGIAPGAKKPQVRHFHTNKQPAAL-----  
-----

>Cyprinid\_herpesvirus\_647842140

MGRHKHELLWIEVL TLLLCAAVASAGPPTFSLDEKFSEGERPKDSVCYVHNTMGASAMGNKAA--  
LSQVNL DVEVSDGLKLDGFYYDAESADESWSRVYKSI FDGGKQAIYEK FARDLILKSCDNLRN-----  
--TTYPMRSPDALPVQLTGEAAIGIGGLNMGFATFNL TDMIFSFG-----  
FDFDFIRK-----DDLKRAYVRARIILDAEKVAVYLNKTEVVVEKAV-----  
FDYKFRQGVTRGYSENLTYL RPMN-----QTFYTSPPPG---DDYCALVRFNYTIMI---  
ESIQGDYDNELILLDNIQRVITFNV TG-IPTGGKGLP-NIITECILKTKEYAND-----  
TCPENKLWFTSDD-----IYRESRNLRTK-----  
TSIAEVPSPMKTTKAPKTTTIVSMTINCTTPTNCTNCTAD-----  
CPNSYPNETVPEEVTVD-----YDCL-----QVEL---VKPIALPVTYDPEQDEIVFSL-----  
YAAVNRTFDYT-----VGKFNW-ETFCLARHI-----  
KAITNGDVYLTMPYPWRYMFDVAKY-----MKTN-----  
TEDASLLEEDL-----KQ-NVFTLATLDVTNRLKA-----DFFEMFKESH CNTWED-  
LALVISSKLYLDTIVAVSSAEKTAVSTLAVIQEMFDPYTF---RTVERH-----KSQLITN---  
GNAHNYNLN-----EIITRHPEFKPARKYRRVSGPSLTVKSLTY-----  
LNCQKPINKTQQE-----ARKRTRRALLTVVDHTDETMLCAFQSGHHGEVGSDC-----  
THHNRKRGLWD-----RIKGNNGSAGQPPPVDRTLKPGRVAVG-----  
PGTSGELIYSEINHHA AIDTKARVDTAVTNVL-----  
KGQDFKTMSNDKLLDVMKVKHQVNGGATTNMYDFRQK-----YGLG-----  
QSSDVVYSSLE-----GTASGGRIV-----TGYQAGGS-----T-----  
YSMAGYGGAGGAAGGAGAAAGGAAGGGTYSMAGYGGETYSMAGHPQGGGGGAAYASV NKQRGMGGGMSMG  
DVYEEPPRYNARRDI-----DINERLTSHARDNNHMTTSAQCGRRFKRDANAMCM--  
IRPEGNPFGGTADGLKAMDID-GDGKPDMLKAMDIDGDGKPDVLRIMDPD-----  
GDGHPGIGAGLMPGPHIQMTG-G-----  
VNPMAVMAGGMMASMMATSL SASNTRSIDNILSGKYAGVDKQLAVTLATMDKLNEFGSMMAMGGGMAAMM  
TMNPAAI AVAGVGLGLQMITS LVTFSIQIHQLLYPTN--PPRDPILDKYMEYRKLMLADA-  
AGNRWCMPES--  
KLEVTLGFFNRSVHLDGSRREDGKQTTALWAPAGETRIKVLYNPLITFNAQLKVTCAGDGALRFNEFN-  
SKMARTRGANS-  
VGTSVWDVTQLASMVASEPVIHGRCGEATNLI IEREFISEADMILLQKRGPGEALTAAMP SDVCDLFPF  
KKF-YVSMPCSSEYEPGEPHYGWTTCSMMFKRAIWNPVNGTWMVPNPF-TPRGS DRKLF-TFSRRDFR-  
TYMPIKPNSDPQHKLCSNAIKPGLCRLPEVFGVEDTS-KCNNKARFFRVHVAKPVNASLDGAI-  
QGYMMTCQPGSIASF-----IIKKG---  
SPDNMHMLNLD SMGTARTFFLKDTEKEKAPVWVIFCQHMSMPAFKSDI IELMLDDTD TAGQLVSLATDNY  
A--FSENWANSI-----MFRISRIGPRWQ-----YDIPEDDENRIKFLPEIKR-  
HIPMSDVVQ-MDINGNGENFDSKETFSF-KTEMSLHDLDDHF-----  
DDEVGRKWL DWAQRGCKATSSVQVNIGFCSTVKDHVEMDLVGWFRWGWVDEPWG--  
KGT LAVD TDSWVFKIPDGKDTLTLKKA----  
KDPTSQEEEEIKTMPDYTFTHKLKKNVYIDLKAGSLKIDCPTTDLTVNDLVST--  
TTGKRHTHMCVTVSPAKDSCAREKAACGTRTSEFADQKLKAYWEDMYKDPEWTM---  
YTPYWYWCEGSEPRIGY YFCQDQGVRRNTLDGQTRSTVLVYQKMYDYTPPMT-KSYQS--ANRLGSD--







TTSATLDDQLCFKHSIYHTPFTLGHVRSRQDKDMI-----DGMVRSYVNRSLGEF-----  
PWNDWFNDI-----QNQIQDMCLTFQNSDHSN--  
TENGFMMVFG-----

N

GPGSKA-----AETCLKSGSGSSNIF-----SYNGQGGNLIVAMNA-  
TNNDTDTLLSNSTISCLHN-----

ISEGAVYDSDDKPCPISLQ---DRENLT--LPNSFYSNVSSARLD---LNSSIDYFWCR-  
INGTGGE-----TDLFFEISNRSRQMIYLFHG-----GNVSDDV-----  
HFGLGNDSDRNVMLYCGG-----  
HCPMPNARARLRADDEGNGDKKKKE-----GPFKKLFGRLT---  
GN-KH-VIPPGATRVLGADGR-SDFPEPGQPVSVSGIGGPGDDTRQR-LLEGLGQNA-----PRLPV-  
GNLPDMMNKLQGPQLPPPLPPFKDKFQS-----MQGVGSQI--IYADLNLPG---  
GGREEVYADLNLPGSGARGGTRPKAGSRPPLPPSGGRDGN-----  
RHRPHGSPGREGGAEDTLYADIQSGGPGRRGGAQRKPLPPIPSKPKDPLYA-----  
EVQKKPRSRPLPPRSGHR-----DSSSSDSDFEEIPVRTSGGQWVSGS-----  
GGRSNAGSRRLPSGNDFEYPPQRTGSGRWVSGSGGRSGAGSRSRFPS-----  
DSGSDDDFEE-----IPKRTGSG-----  
RWVSGSGGRSGAGSRRLPSDSGSDDDFEEMPIKTSSGWVSGSGGRSGTNSRSRFPSPDGSND-----

DFEYPPVKNSDGWSGSPFDMNVDTGTVKRLGSPSPKNPPGVVPRKKPPPPPPPKRGGGGSSPESQGR  
RCRRSLTGTQLICGMTGAPAVSTNAASRDGRDLDKMLQMG-----RKQQSMLGGA-----  
FLSATLSSSHQSTIDRIHRGDFSGPDHAANVANVSEVLNKVGSVAVTGAGMMT-----  
GNIPAMVAGLTGQVLGGLIDIGLTIEALISGRNEVAKPDPVAELYSTYARYVASHE-AGARLCLLPDS--  
RLSVTVAYRHR--GMDAEAGE---KSLPHASDTPPSVVQYLRTGLAGYTARVEVTC-  
RGTLLRLQGDINHILRSFEAN-DNTKHY-  
FINAVAMVSSFPNATLTCGIEEGLYFVPPYDPPSDFQLLDRTGIGEPDSLRLKLPDVCDFPFKRF-  
YFLTSGCEYDKGQVAMTYTTCVLLRQSLWDDKHRRWFAPDPF-AHPGSDVKVF-TFARYDF--  
PEVPLKPNIEIPGHDDYCSVR-DQPICYFTEPMVLDQY-TCHPRSRLYEIA-----  
PTTQSGVYTAIVITCPWLSTPVV-----IP-----SFAPVTRVNVGAGYTTAMF---SFK-  
ASGVRANIYCQHNTNERMKSDLITVSSVIPLKDKPEGYLDIYNQT--EKNKIIDSFQ---  
SLFMMYLSKKCVTIEEMKSFNLKHSTTYGHNHLPWPQGTYLESTLRIVKKE-  
RVVIAENIDNADLNVRFVERVGTYYPGGL-SLEYDVSWELEDGY-----HVNKQFFW-  
KNAELGRRTYSALSVMIFPCNVRAGHYIT-----NLLDVTVIDHLVY-NAIDDGTGSGRE-  
FPFRS-----TTKE-----

CEASISIKDRLLTVVCKAYSIRIGIWSRE-----LCVALTTSVNHCN--SDEEAVMK-----  
SGYGRREALSN-DYVGLLD---YMPWLTYPRYPHLC-  
YGPSYYPAYISVPKVHVCHTLSTIFHHELEIESQHFSPPPYPL-SKFFSPD--DVIIPAELYA--  
AVLKLKESLSLLMEYTRNPLIKEINT-----  
FAKYLSDGRQIARVIVDGQMLATSYLAREEMIAILEEQIHERLIELVE-  
LIIDRNALALKRKHAEEHSEMEC-----CILDPAK--TSKKAFDD-GFY--LCAGYE-  
SFVYLD-----PDEGTRYLMVNDSELEDGYIWMN-----ESVSCVELIMLMVGEDE-----  
RDEIEEQLSKIL-----

-----IEE---AVETL-----FK---EYD---  
HNLTLSIMTYL-----  
NLTNATTWDNATEDLVRTGGGLPGPTPTVGVPEGPDGDEGGSLHIAPVVVLALLVTL-----

VFAAFVAVWYRKRMGVYSVEAIAKLRYSGNSVSMTRLIGTDQCET-----

>u1\_Nilcr115531705

MSCAARHKALAAFTALAALLATVA-----GSIEDRICFSKRSIYHSNGLGAKGR-----  
AHQEALDRKVDGFVREFLGGL-----PWDEYLTNV-----  
TNELQWLCENTTDPD-----  
PRDGGVLSF-----

SSAANDSVI-----  
SCLNASGD-----  
FPPPRDRMYGSGGGFTVAINGSNSEKELKCM-----

GSTSGYLIIHSSFHSCDLTLLNAR-----DNLT--VPEGYIMNLTDKHLD---VASGISYFWCR--  
INQTDNEC-----RDEEHILALRSRLSVYGTVAGSKNKPKTLQNS-----  
SESVEDVDVMNMYCKT-----  
HCPPSITLLRTRRSDDKNPKLPPGPFISKIVQSVT-----GDPGSSSDSDS---  
SGGGRIRIPPGTDMVQFGPSGP-----KNGAFGVSSRDLDKASGK-LADNLKMF-----PHIPT--  
DTGIEDLTQIGRFDPG-----TLPGGQ-----IMGQG-----LGDKLTNIG-----  
SRASAAQSLGHDVSVRSRAGPSGAPHP-----  
GGRGDGGARPRPGSSSHISVPTSGPGRGRGAGSGGRGAGRGSWLPPPQPGSSSD-----  
SDSSSDMPVFAPPQRP-----QVPPARFPPQFPFRGGGFRGGFRGGSSSDT-----  
GYDTSEGMDGQAVNRRRFLPPARNLYERHNRPT-----PVNP-----  
QSPYGSSSSDS-----SPYTGPGDE-----SGPVSRAPGFENDGRRRH-----  
YWLPPRSLSSSSSGDEITGAVGYDPGSDSDVESKFGLNLDTGSGPVRPDERRHQKER-----  
-----RRGFGQRDRSDSSSSSDSDSPTPSKDRSRRRCR----

RSLEDDALICGIASGVSDNN-----  
PGGRSGDRLQERFKKAQKQ-----RGQAAALGAA-----  
FTSVLSSTSHYTYTVERLYRGDFSTGDRGADIANVVSESLNKLGSVAGAGMMS-----  
GNAKVMVGLVQSIGGLIDIGLAIYELVSGNRQEPDPPVAELYSTYAQYVATYE-AGARLCLLPDS---  
RLSVTVAYRHR--GMDAEAGE---KSLPHASDTPPSVIKYLRTDLAGYTARVQVACP-  
RGTLRMLMQGDIRQYLLQFVEGD-DNVKHY-  
FINAVAMVSDYANATLTCGIEEGLYFVPYEPDPSEFQLLDRAGIGEPEDLRRLPSNVCDLFPFKRF-  
YFLTSGCEYDKGQVAMTYTTCVLLRSLWDEKNRRWFLPDPF-AHPGSDVKVF-TFAKYDF--  
WDATLKPNETPGHDDYCTVR-DSQICYFSEPMVLDQY-TCHPRSRLYEIA-----  
PFKTTGVYSAIVITCPWLSTPTV-----LP-----PWAPVTRINVGKGYTSAMF----  
SFMKTEQT-ASIYQHNNTNRMKSDLITVTSRVP-GNAKKDIGWFDTRDGDAAERIRITILG-----  
EQFPKLAKTCVPNSHYITELNKQHWSPSK--YELPKELKEKCKVSLVKRE-  
RIVIAEYADPADLDAVIDRVGKYYPGAI-STTYDVTQLEDGY-----VVKHLFW-  
SNADLGLRTYNALMVSVFAC SIRGNRYLE-----RKWD--LIDEMIYYPLKTNNWGKDL-  
YTFSSF-----KSL-----  
CDATIKIRNRQLEVSCKSYSVPILLKGRQ-----LCVSVTTSINHCN---GDNVAAT-----  
RGCTLEESELGAIKPGTSSKMYRPGSY---PQYYC-









EAFMYSNDSLIMLGNINATINKSEEN----NPNTLKGNTKILQYTNCNNVTAN-KVEF--  
SIHNITNG-----  
TKVKVSLGVTGDGSGNINSEELIQCISK-----  
-----  
NIDNDTVYTHQVVSACEECSMKFM----ASVTP--VSVDNFNTMNEIGIEM--DNSTDSFYLCN-L-  
EEGDNC----MEFIDLSSIAVGKTVEILKHSNLN--NTTHSRHRRSI-----  
ILETESSMEEFDCRYLHY-----PDVDEMASCNAKIRNRRSDKEPKK-----  
EKD-----PGFVDNARKHL---GN-KP-  
IIPRASHLQVGIQK-----RESGVTG-DGAIYSEVKKK-AKNIVYSIA-----PSLPS-  
TRKPEDLYATVRKPKLPP-----KLKSDV-----FTEALRET--IGQKQKSIS-----  
DVLVYAELEFSSHRPPKNKHVPS-IYSRIDF-----  
SRRTSVSSVDSEPDFEDIEEVKRQLQALRLGSTQ----  
SRSHSSTSSDFE-----YPPPPRRSS-----  
STSSDFEYPPPPRRSSSTSSDFEYPPPLKD-----  
RIQMKKGTSLDPAGNTITKRLKNIGGVKGVNIIKQP-----PSPY-----  
SPTLVKGV-----TGTVLTP-----LTRK-----  
GAIRRLDSDKTQLGSGIQFSPAQSPQLDNEIYMEGPTNGKPNMFPPNRPLPPPPVPPHGPPLPPRDM  
SRRPLPAIPEDLNPK-----SGAIPKNLHRRRCRRSLDGVVCGMLQSKPKLESTYSLAG--  
SPT-SSPYSLAGSEPPLYEE-----IGGIPKEKVVVDKSTITRGT-----  
DSYENKSSGGYKGSMMKIS-SS----LDKSLIFGGAM---LMAGQAAQHQRQSVIQRKDSM--  
SKEEKVFEAVTISLSTLGTLLTSAG-LA-----GGPKLMIAGMAVTAITGIIDTVKDIFYLFSGIE--  
RPKDPLIKLLDYSGLINDREKSGVRKCMVPGD--SMMIYMAYQNDTRSFKPEK-E---  
ITELYFLDTINSELLMNTSDIILDYQLRVACP-IGVLRSPDITAYTIMYDDGE---  
VKKYMFTRLGVLLSRTPVVRLTCGRVTTLTIRPYEVPISMQLLKMATPGEPKSTRSIPSDVCDKYPLKK  
F-YLLADGCPYDTSQTMIVHTTCGILLKMSTWDPFRNRWVLKNPF-RQEGEFKQLF-TFSKYDF--  
NDTIIDPNGVPGHSDFCNTK-QSSQCYWAESMMLEDVT-SCQTRVRKIYVKIA----LFGDRGF-  
DSFVLTCPSGSTPVS-----ID-----GNDKIIELPVG DYGT SKLF---ASI-EKKR-  
IGVFCMHNYDTRYKSDIIILFE---KNSHPRGVYKANYN--DRDRLFTSLS-----  
AAMPYRSRSCDNRRQEC-----Y-FGD--IDFTN---  
PDVELEIHHSSKEIMLKESYDMESIDPDVIEKSKTGFP TAI-KVTFTVNNLGNAY-----K-NPSRFW-  
KDAINKKRTYSTILINLVPCTSRNKDIKF-----GN--IISTMGYLQSQTGDYGDGKH-  
YYFKRV-GTYGGN-----CQAE LDLNSRDITVSCDPFSIPRANVVNY--  
EG-----LCFAVVTSKDHCA--TEKEWMKN-----HGTYIKHSTYA-RAC-----  
RKRTAFYYTPTDYYCGYNGDIYD---YFPDYDACKSYIHIEYKDIWIESDVLQSPPYTF-EFTYNSN--  
NEYVSKELSD--RMNELYEEYKKLIEYTDGTLPKSINR-----  
LAMALKEGREITSVNVDGNILELAYQADKEKIMEIQDRISEITNEIFI-  
HTLTDEDLKEIMEAAENDR--C-----CIIDVHNN--RTEKYPI-DKY--ICGEVS-  
DYVYT-----DEEKRYVLINDTYIPYEYLNQSG-----AIVTTCYNISIIPLDTKES-----  
RKIAEDAIYNA-----  
-----LSD-----ALNEI-----FD--EMD----  
ANISLALI-----SD-----  
ESDYIESSSNILIVSL-----  
ALVAISLITVLLIII-----  
CSCFWVKRSKYNILKTAHIQEHIELDNESYSSFSG-----  
-----  
-----  
-----  
-----  
-----  
-----

>u0\_Cotvi377830103

MASIEHIYILFILTIIDKTY-----SYETCMRKTALYHDDKIQDKTESDKVST-----  
LPYKYLQGVERRERTRLLLSF-----DWESISKSV-----  
SDKFYKICDNNET-----  
YLYNYTISMYITINSTDTYIPTTVMPYISTSPYF-----T-----  
NPYTNTYNEIKQSNISKTTITLLSNIMGINETFI-----  
YNYITSSKLNNTNGVYEAIIGLIT-----INECYNISSKNAIIK--  
INSSGDSEY-----ETLLLIFGE-  
TSSIDVFIDSTNITKLEN-----  
-----LINNTI-----  
NDNTKISYTTNITSNCYTSSISFM----SSVVE--IVEEYNKTLNIGLKS--SNYTNDYYMCK-L-  
TSNSSC----VELIDLDDIIANITLTNLINN-----TKTNNRHKRDL-----  
NNDITYRTEKELQCLYESF-----GLDDDTSHCFVTLRQKRSDKKENV-----  
KKD-----LKMLDHARKDL---GI-TE-  
TIPGGVTHIQTGUYGA-----SGTVMG-DGEIYSKIKSH-TKDLAKKFL-----PTVDT-  
NLQVSDLYATVSKQRKLP-----GTKSTP-----FTESMLST--VNQKLSNIR-----  
EVTYSEVTINQSPQPHKHKYNVSEYATIKP-----  
VSVNSDNSDFEDIDQVIDQYRKKYGGSGKSSASRLSSSSSSSSSSSSSDFE-----  
-DIDTVLSEYNSKYKG-----GYMTKGRESSKIDPLYSTVKKVTSGKALTKGA-----  
MVAATKEGFST--IPGVSVDTSIIT-----  
PLTR-----  
RGAIRNKI-----  
VKTTGTISKEVRTHSVPFNERSLPPPIGESLTPPQVPPRKESSLKYSIPI-----  
-----TNHRRCRRSNNGVVCNMIQSKPVNDETYSLK--  
HPDRVYEEISGGIPRSKVKN-----  
NKKYNSKYKSSMSSIA-TK----FDKSSAFGAAM---LLTGQQAINHQN RAMVLSDNDKM--  
SQSERIFEAVSMLSTIGSTLTSAG-MV-----GGPKLMIAGMGISAIAGIIDTVKDIYYLFSGYE--  
RPEDPVIKLFNTYSGLVSSSDKMGVRKCLTPGE--EMIIIFMSYRND-SFKPES-E---  
KTSLYFLDVINTDLLYLNTSNIILEYQLKVAC-P-IGTLRSPDVIDITAYTIMYDSS--  
NDIKRYMFIRLATLLTKHPVIRLTCGLSTTLIRPYEVKISDMQLLKMATPGEPESTKSI PSDVCDIFPM  
KKF-YLMAGGCPYDTAQTFIVHTSCSILLKLSTWDHIKNRWVLQNP-F-RQEGDFKQLF-TFNKYDF--  
KDTVIDPNGVAGHASFCTNR-SSNQCWFSEPMILENTK-SCQSRVRKIYVKLT----VFNGDGF-  
TSFVLNCPGSPVC-----IKRTNDEYSDNTIIELPVGDYGSALF---SSI-KPAV-  
ISVFCMHNYDKRYKSDIIVLNFTSN-SMLSLSKNIDNNY--HKTNMFYNLA-----  
SGMPFRSLFCDNRRSGCYAG-----IPLHN---DSIDVELHYGT-  
EIMLKETYDTNSIDQKVIKSKTHFPSPL-IVKFNVDNLGKY-----D-NPDRFW-  
SDAKMKRTYSAIAIKIVSCTLRNKNINF-----GD--VISNMIYLSIDMTYGNNGNI-  
YTFKSGEERYNHTM-----RKKNNSNKKTIDIPRCEATLDLTSRETVS CPAFSIPR-NISNN--  
EG-----LCFTVATSKDHCA--TDDEWLKS-----HGYWYADALTK-RVC-----  
SYRWGYKTNCLDYCYSEDGFKT---RFPNYDPCKSYIFIEYRDTWIESNVLQPPYTF-EFERDNS--  
NEYVDNEITI--KLNKLYNEYKNIMEYSDGSLPASINR-----  
LAKALTNEGRDITSVNVDGNLLDIAYQADKEKINEIQEKIDELTRDIFI-  
HTLSDKDIKEIESEDNNR--C-----CILDVKN--HVEKYYPI-DKY--ICGSLD-  
DYIYT-----DEDNISYVLVNETYISYNYLESSG-----VVVLT CYDITI IPLDTKSA-----











>u1\_Fowvi9634777

MYKYIMIYAFIYIHK-----TDSKTCMKNLPMYHSAQNSVEN-KQSTDTKAE--  
ALHKYLELAEKEKSLFMGKF-----DWEKIRKEV-----  
KDAYKTKCIKKSNGSTH---  
YKYDYSYKYVLRVMV-----  
QVTKGTKIGDSKKKTLMSLIQQLTTANSIDEYVT-----TSGSGYSFKIPDID-----  
YVKYE-----NPKCANNVTIS-TVSI--GNFSVTDSR-----SAAEDIIINFNG-  
VSVQHPYMDSKFPDCINK-----  
-----IVESCKT-----  
SNSFISTIRKTLTGNDHASMSLM----AEVVT--PPNSYLNIIIGNFSIKD--DVNTRLFYECM-L-  
ENNPDC----SNYVSLAADTAVQATKILSSYM----YTKGNRHKRDT-----  
GEIPLDSEDLCEMYEAY----  
EPYREGTEYTECVNSKKAIEIAKSRKKRTIVPSINTDT-----  
DDETKMMARYL---GV-DGQVIPDRVSHIQTGIHGG-----SENDGIIG-DGQLISRSLQ-  
ARQAFAPYM-----PSVPL-DTDPYSIRDVLRSTSNLP-----PPSKNP-----VIAGVYSV--  
ATNKVNSVL-----  
SALSDDNRHKTVIKEYLTEGDGITKQSKALHG-----  
DVKTSYSSKKIVSGSIFDTMKEKIRDFRD--  
TGGEVLLTKYNQRQSSLMFNVD-----TSTSIVKPRRHSIES-----  
SMKEFGRRIDSLMETIQENNFDSLRRTKSTNS-----IEDCGKFGNTA-  
ACALLGRVPDMGKNNNN-----NVKH-----  
NTAVNILID-----KLRNSKTP-----  
LRVPKIPISTSI LGRSGIKHTVSHVTFSDSKIDNHERSRQYVRQG-----  
-----  
STRSRVSWISNSDIDDIDSSLYGRSRTYSGGTRSNRLRSESGYQGDTSRSDMEGS-----  
-VYQPSIKELDIKS-----KKVYREKMIETA-KK----FDKTAALTSAT---  
QLIVQGMISARIRNENFKNVDF---NEAETIFEAVSASFSSVGNAMLSAG-II-----  
ASPTVAFAGMGLSFISGLLDLGNHLYQLITGKP--KPEDPLVKKFNQYNELVSDSTRMGVRTCLMPGS--  
DLVIYLAYRND-SFKPSL-E---KLNLHFIDVPESIVYYLNTSNIIMDYSLTIACP-  
IGYLRSPDLVDNAFVTLKDVTD--  
EEVRFYQVTRLGAMLSKSPIVRFTCGREVTLTLKPF EIPLSNMQLLKMATPGEPEESKSMPSNVCDLFP  
KNF-YLLVKGCPFDNSKVAIAYTTCVLLRMSIWEENRRWLENPF-DNKNRFKQLF-TFNRFNF--  
NDTVIKPNEISGHAKFCANR-QSNHCHWFDVMVLDLDDIS-SCENRVRKIYVEIY---LFSGSRGF-  
TSFVLTCPSGSTPVA-----VG-----NKDGIIELPFDLFTVKMF---ASV-KKTN-  
IGVFCVNDYDTRYRSDMIILKFVEP-NFPK-DVLPLDTYD--GQNKLFNELV---  
YNHMPWRSRTCSNIVGSKSCIS---F-HGR--IDIWN---PNYVVDTEIGS-  
EIMITEKYDPDIATLSSISKSSHYPYKL-QLKYSLSGLGKVY-----D-TADRFW-  
QDAKKKFRTFSSMLIVLPCNMIQNIICY-----HSQ--RISILQYQALTNKYGDGKK-  
YVFTTL-----SGSK-----CTAELDLTTKLLSLQCEEFSLPRSTLPQY--  
EG-----ICSITISSKDHC--TTLDSKY-----RGYSSSHANTP-RRCM-----  
YKYPISMYVPDNYCGYGLY--GTYYPPQYEACKSYIHIIYSDTWIEKEILDEPPYAF-NFKYDTS-  
KNEYIDSTISG--KLRGLYQAYKELYEYTDGTLPKSINR-----  
LAGALSDKGRDIASVNIDSSVLEVAYLADMEKMAQLEEKIKDLSKEVLI-  
STLSDNDLYEIIIMKEQYGM--C-----CLLDFKLN--TSTKVYPN-CNY--TCGTLD-  
DFIYEEDT-----GNTTEITVLINGTHMDYDMFSVSE-----ASVVTCLDDNVIPLSIGSA----  
RSEVEKNILLYS-----  
-----IEL-----GLGSL-----ME--ELD---  
YNISSIML-----SN-----











>u1\_Canvi40556092

MDIIIIIFTIFIAIT-----RSEFCRRKSSIIYHNTVKSLNHVKERTDYAAT--  
ATYGYLSIAEKVHKEMFIKSL-----NWDSILASV-----  
KRIFLAKCSNNKGV-----  
FRYNYTINMNITVSA-----  
DLANGKDTENRKSINKNIVKTLNNSMINQFV-----N-----DTGDRAYFNLPMVE-----  
HVSYF-----DNGCANNVTVD-EVII--YNFSVGNNGDKVKGSPQARSVIPITFKG-  
VSTHEPYTASDKFIECIRKR-----  
-----IVKECQ-----  
SPKGVKIDKSVISNCECTLSLM----VEVAG--IPEEFNTTLRENGATP--GTLSELLYACM-M-  
TNGKDC----IDYVAPIEKFQSDTLLSLSSYI----KQNNHRVKRDA-----  
DKYIDISMEDIRCMYSMY----DNRKKEDEFVTCMVTNSRSKRGTSED-----  
ENDPDD-----IEVSQYLKKIM---RM-EE-  
VIPREATHLQLGVSTS----YSEESSIQVAG-DIDIRAKVKDR-AKKTLQNFL-----PNIPA-  
DTSTDEIYDKINRPSRNQVP----EDSKNI-----LSGRLAAI--  
TARKMESVR-----  
GALESRIGYSSGSEDAGYAEHQFRGASGGASAGASALYEEEDI-----  
QMVESYVRRGYMRRRTGDDLVENIGAYRQ--KGGKGVHVVSTV-SDTSTGLFD-----  
VDTSTLVVSPLTRKGAIKRNTRSKY--KNLRELVDSAATPPTPSRTDRRDDPESPRYHSPS-----  
HRRCKRGTNDV-VCAMLGQRSRPEGNRNGDDYIDPRTASNAMRH-PNPP--  
AQAPSNAGRGRIRTPSLQDPYQSNID-----AAIAMGIVPGRQGRVQGRQDSLQGRQ----  
FQDQD-----PYQQHIDAARAMGIVPGRQ-  
SLEGRRRHPSAARGQELIYMSTPNMGFFGNMQQAARPFNLVTPYAYYDVANSMRLTSYNDYDR-----  
-VRDAYNLAHRPLPRIPGSSSRSHSSSHIYDSLMDLDVGDMMYSGS--  
VSGSVSGSVIGSVAVDSSAIS-----  
GDRGSSGSDSGDSRVSGGSSRSLFKDNTGRISTTSSRYSEKMQKVS-SS----VDKAMVFLAI----  
QTMSMNTINRQSRQLQRIEQGFR---DDTEAVIEAVSTALSSVGTSMATAG-IV-----  
TSPYLSFAGMGLSLISGLIDIGKDIYYSLSGTK--KPIDPLVRKFSMYNEIVADTARTGVRKCLMPGS--  
DLTIFLSYRSDT-SFMPQV-E---KLATYFIDTIDSVLYLNTSGIIVDFSLTVACP-  
IGHLRSTTLIDITAYTNLKFTTD-  
EGIKFYQFVGMAAMLSKFPTVELTCGKDITLTKPFVVKMTDMQLLKMATPGEPATKKFPSNVCDLFPM  
KNF-YLLVKGCPYDASQTSITRTTCSILVKMTTWDDKNQRWVLENPF-ERNKHRQLF-TFSTYDF--  
NKTIIKPNEIPGHAKYCANK-HVKECYWVDVMILDDIT-SCASRIRTLVEVY---TFDSNAGF-  
NSFVLTCPSGSTPVA-----VG-----NTSGLIELPLSDFFSVKMF---ASV-  
EERSGVAVFCVHNDSDRYKSDILMISFVKP-AYQE-EAVLVDTYE--GKRKLFDDLIV---  
RGRMPWRSRTCVTWKQGRTCIG---Y-YGK--VTLWP---QDFILRVDVGN-  
ELLITEKYDPTTVDAMNLEKAITRFPYEL-DIEFSVKELGRSY-----D-DPNRFW-  
EDAKKQLRTYSSILLLLLPTSRANIFIY-----DYNV--VISVLGYMQSQTNDYGDGKK-  
YTFKHM----EGGE-----CTATLDSLKSIYMKCPMFTISR-NISKY--  
EG-----LCFATITSKDHCA--IKNDEYKK-----YGYPNKAADKV-RHCGV-----YTWPDEE--  
DPGHYCGYISTWNHVAYTHPEYEACKATILIHVYDVTWIESEVLDPKPPYVF-  
NFKYDKRSNNEYVDKELSD--TLKTLYDDHLKLEIYRDGSLSKSINR-----  
LSEALTGEARSITDVSVDADLIEISYVADQEKVLELEERIKETTKEVIT-  
STLSDNDLEEIFYKNDDEK--C-----CLLDLEKK--LAIKIYSE-ENY--TCGLLE-











-----  
MYKLIITTLIAARWSS-----YSEFCKRKTVPYHDTDKKPES-KEKIDYAAV--  
AALKYLSKADYVQKEVFMKSF-----DWDKIKKKV-----  
RDVFLGKCSOSSSHGI-----  
LKYNYSVTLNITVET-----  
---KGNKNEDIKTIVKKLAKELLLQNDKTIRRYI-----N-----DSKTNTDYELPKVE-----  
HITYK-----GSSCNDITVD-EVTI--GGFSINNVQ---SPSGYISTIPVDFKG-  
VSTHSPYGDSDKFLKCVME-----  
-----KISGCA-----  
KSKGNVKEKSIISNCEKCTMDLI----IDVTA--IPEEFYSTLQKNGANV--DDLTELFYRCM-V-  
TGNKHC---GEYVPPNNKSKEDKLSTLSAYIKK--RRNRGRRRRDT-----  
ESKTSFSKEALMCMYRNY--EDDDDDDDDFSQCNELENNIITDRVRTK-----  
RGISDDED-----DDIVDYLLKIL---NV-EE-  
VIPKASYLQVGATSENKRD-----KVIK--DADIYRDIRKR--SRNLFQGYM-----PTIKE-  
ETDLMLHYELDKKVKFNLE-----RDTKKI-----VSGSIEAI--  
LEKKTDSIK-----  
SILKKRPEPEYQGMYSSTGYESSRSTVVLSEGDFKKDIYRLDH-----  
SLQGNQYRHPVMEERQGPSVARALKDYVS--KGGKGLNVL-  
SRSHVSTGTFN-----VDSSTLLSPSRIPE-----  
SRANQDVMHHLRRTYGVFNINDPKNYDDTIV-----RKRCRRSSQGA-  
VCGILGRIALSNSNNNANGNGNDRNRPA-----  
NMPNENIYLYQAEVNNHFRARGFQQGRLENQDEMDYVNPLQAQGFRRNRNPQRY---AGTVQAQQ----  
VYGMQ-----  
PSQRPLSPPVIPPRLPQPPPLPRLPRPVAAMHQQNQIYFQVGIPSIASPDIRLSSTSSASSAGSNGIYG  
ILQLPIDRYPNPAN-----RPLPRIPIRSSSTDSSDHIYDTIGSRRSYAGSSSTH--  
YNTISSIRSGGGGGGGGGGG-----GSRRSSTSSVFSS-----  
SSSSSSYESNMRRIG--SS----VDKAMVFLAL---QMMTMNSINRQSRRLERMERGFR---  
DTTDEILEAVSTSLTTVGTSMATVG-IV-----TSPHLAFAGMGLSLIAGLIDAGKDIYFFSGLS--  
RPLDPVVQKFSMYRDVVSDTSHMGVRKCMMPGS--DITVFLSYRND-SFMPKT-E---  
KLATHFIDTIDSVLYLNTSGIIVDFSLTVACP-IGYLRSPDLTITSYTKLKFTTE-  
DNVKFYQFTRLGAMLSKFSIVELTCGKDSTLTLKPFVPISEMELLMSTPGEPEETKSIPSNVCDIFPM  
KNF-YLSVKGCPYDGSQVAITRTTCSILLRMATWDDVRDRWVENPF-ERNKSKHRQLF-TFEKYDF--  
NDTVIKPNTIPGHAKFCANR-QIKECYWTDVMILDDIT-ACANRARTLYLELN---TFDSNRGF-  
TSFVLTCPSGSTPVA-----VG-----DKDGIIEPLADFYTVMKF---SSI-KPRT-  
IGVFCVNNYDKRYKSDMIMVSFVNP-KYDN-ESVLIDTYE--GKHRIFEDLT--  
GNHRMPWRSRTCVTWKQGRTCVG---Y-YGK--VEVWT---PDFLLHIDVGS-  
ELLVTEKYDPNTVDISNIEKANLKFPYEL-DVEFSVGNLGMAY-----D-DPDRFW-  
LDAEKKFRTYSSILLVLLPCTSRANILTY-----KAED--IISVLGYIQSMTNDYGDGKK-  
YTFKHI---EGGE-----CTAELDLKTKLIRMKCPGFTIPR-TISKY--  
EG-----LCFVTITSRDHCA--MQSDDYKK-----YGYPKTTADKV-RYCGA-----HAWPDET--  
DPGHYCGYISNVNHVPYTHPKYEACRANILIHRTWIESEVLDKPPYVF-DFKYDKS-  
KNEYVDKELSD--KLEKLYEDYTRLMEYRDGSLPNAINR-----  
LASALTSRGRSIADVVVDSEILEIAYEADKEKILELEESIVKTTKDVLT-  
NTLSDEDVEEIFYKESDEK--C-----CLLDVVNN--SSIKLYPD-ENY--TCGILK-  
DFMY-----TDDENTWLLVNGSFVDYGLVGVTG-----IPILTCFYPTIVPLTQNVII-----  
KDVEKNLLIHA-----  
-----IED---AIQDL-----IY--DLD---  
ASISVSLI-----NN-----  
NITSIS-----  
-----



EG-----MCFITATSRDHCA--AETDDIKS-----SGYSKEQAVKT-RYCDT-----YTSPAVWE-  
DAGHYCGYFSSLRHVGYVYPKYEACRSYIHIHYRDVWIENEVLMKPPYAF-EFKYSKS--  
NEYINPKLSD--SLKKLYEYKMISEYTNSSLTNSINR-----  
LSSSLTSHGRDITDVIVDAGVLETSYEASVEMLKDLESKITDTAHSILM-  
HLSLGGKDVDDIYNKEEL----C-----CLIDFKKD--TVTELC--RNY--SCGTID-  
DYLYDDFIEYNDYKDDVDRVLILVNGTFEDYNFLKSVG-----DPVITCIDPVVIPLHNKDT----  
KSEVEEAIVMRA-----  
-----FKE----GLEEL-----MH--ELD---  
FNISSIVL-----KN-----  
NISNINM-----

>u1\_Fowvi41023385

MKNIIIFMLIVLLFSLVYS----DYEDEDEDENTCLRKHAKYHLSLTKTISP-KELSDHKAS--  
ATVKYLSSVRKKEEQRFSECF-----NWTNIQQTV-----  
KNRFVKQCELSTDKDHTR--  
YQYNYTYVLDVSIYAPKK-----  
PKRGDNTSARRKVTSCIVASALSLSKEDVQYLIC----K-----TSDNKLTCSLPSVS-----  
SITYT-----GNKCRNITVD-KVTV--GNYSVLTDN--NNENAHTDIFITFDG-  
ISSPPYESSDIFEECVTE-----  
-----MITTCEEYN-----  
DQDKVVRVKKILTGHCSDCRMGLM----AEVTE--VPNEFNISLKECGGIGY-SDLVNLFYLCV-V-  
TGGDNC----INYIPLTDKIKDSSFVLSAYTGSSRKRKRKRPRRNA-----  
GDESDTDETTNIDDTDLECMYLSY---DNDNDNDNDRYDNCIKNPDKNKYYKRRKP-----  
NRKYHDTNKLKQSYKNRPKRSLD-----EHKMNNLKEYF---GL-EE-  
VIPRKASYIQVGISGS-----EDNVLG-DDDIISTLKDS-MKSKLEKMV-----TLVPV-  
ETPPNSIMSTISKNII-----NSDGGF-----TPGLISSI--  
SYQKQOSIK-----EALTTQSLSTSIEEE---  
LDDIKRRLTHLELREKQL-----GDKMLNHKNTKTRKVVEHYKDSIDKYSK--  
SGGSKVLSSIVYKNPVVGINIG-----  
SVITKPGKSIFQPEQSMHSS-----STRPSLPSSLPNSILYHNTKPVTHS-----  
NRRCKRGLTSA-MCGLMLTPLPRTR-----PVPP-----  
VQSDSSSSDSL-----SVSPMGSFALDSS-----SSSLIGSV-----DLTS-----  
YWLSSSDTESDVNAGAGPS-----  
-----SQRSSRDDSSLHVSSSSSSSRNNGRRSGGSGG-  
GGGGNSISSSGYSSGDGNNN-----  
HASDNDYGARMRRIS-RS----FDKTLAVGLAA---QFITQGLMDRNLRSFMIQDDDR---  
DDAEVVFVSTAIPTIGSVVTASG-II-----ASPQVAFAGMGLSAISGLLDAGRDIYYILSGKQ--  
RPQDPVLKTFNAYRDYVTDTSKSGVRKCMMPGT--ETIVYMSYRND--IVIPSL-E---









-----  
-----  
>u1\_Mo1co9628967  
MSIEAMSSADGLSGPGFTISIIYALEIAPAGKVNFYRHTWSGRIMSPRGDLTARCAVPLVALLTILFAAL  
-----FAAGSGTEMACYRKIGLYSLTGEMHRAQETRV-----  
VSVLDVDSRVLAEEMETLQEGF-----HWDALRSNA-----  
SARFRSACENTST-----  
PQVSYVVRQGLTLLTRANCSDDGNSTDILSGLNGTLLVTVCNMT-----LELQQQ-----  
DCPATMQGLELSVHEGSVTLTLVSGLVSSVNPVF-----P-----SENATRCLMAVPT-----  
KITYNGS-----  
CENIPLSTPTSMPEGTPPGASADTLKNTTESTPGNASADERPLASTPAPLSTPASFFATTLEISSGTRA--  
-----VTVAWNLA STPT-----  
LTPASMSFEEQ-----  
HVWWTNLTVEDNCTIMVGIQVKSSAQ SACERADMETV----LAVVG--VLTEYTEALHRLNLSS--  
DNETKDYECM-M-LGSPSCFLQGLRQVALHNVMQNLQAKALT-----  
RARTRSLHDD-----NAHCLHRHF----  
GMGPGVDHCENIEEPLARVRRSDPPRPTPPRVRRRPRGGVDTPQRPLPKPRPGGGSTPPIPPTKPKSLV  
EKVSESL---GM-KP-VIGPGVQEVQLGAHGS---D-G-----SVVG-SDGLTTSLREQ-  
LRKAVEQRA-----PTLPT-DMNPDDLEKARIRW-----REGGGH-----LQGLCSEA--  
VRYKEESIRSAAGKAHDWSKRKHRWGQRRGFHGTGRGGGHGDESDL-----  
EDVEQVRQQLKEM-----  
GIGPLGRQRSSGSSDLEDVEEVQRQLKEMGIGPLGKRKSSSSSNSDFEHLQD-----  
-TQQQLVKKGLFRGGRQSG-----PTRFDES VWKKLDQLGGPAHAPVFSPQVHGSP-----  
PGDVVAPLETR-MSGDPGHLDVHSSG-----RHT-----PTFP-----  
NLDTGTRVSA-----ETTYAVLG-----GGGG-----  
PRPPRRLRERQREGGDGVGDYAELDWGEQRHAGRRRHGRGVQDGSGLPPIPGEKSP TGRQLGDRPLPP  
TPTSRHEDSPGTRLG-----RKICKRSLD SLLCGMLGTRPDSDSVPHDPV--  
YESVQGPYSLLGEHNRPPATN----PNYREPVYSTLGMPTGPEAPSKTGG----  
GPSAPPELMPADTSSPRMKQLA-RE----ENRLEKFLSAV---SLSTYLSSAQTQLREVMMVQPHM--  
PHGMAVATMISSIVSTAGGTLALAG--A-----  
SNPVTAAGLALQGVGMLIDIGTSLYLLIKGQSRPPPVDPVTEKFSTYARHMAQAS-AGARLCLMPDS--  
DLRLTLAYRHS--HFESAAGE---KGALAFADTPMTLVYYLRSQYIVYNTRVTVTCP-  
IGTLRLLEGDISAYAVLESVGE-  
DGASHYALPGIMELLSNHPNASFTCGSEVGARFVPFDRELGDMQLLRVAAPGEPKETESIPSNVCDLFPL  
KRF-YLLTDGCPHDRSQTAITIYVTCGTLRLMASWEPVRNRWVLLNPFRRSADEFIQLF-TFSQYDF--  
SGSTIRLHELDAPEAFCSQR-VSSTCYWPEPMMLEDVT-ACETRIRKIHVELA----TVGGSGY-  
TSFVLTCPPGSTPFH-----V-----SNVSVVAIPQNTRRTAVRY---AAT-TQTS-  
ILVSCVHNTNPAYKSDIVVLTFSTQ-GLRS-RFSDMEKWT--QRKMLFDSSA--WA--  
MPLRSRTCKRPEENTLC-----HLAYSVSQQR---AEYHLQVQTL P-EQRLHEYH-  
GELDALTQLTRTHFASDL-HLRVDVSFLASAY-----R-TPENLW-  
KHAAKQMRTFSAITITLYPCASMVGMDI-----KYEQ--VLARLLYL--GTKDHGNGQN-  
LTFHALNSLNSRH-----  
ARHGHELHADYSCRAHLDIPEKTVSLHCPPLSLPKAPFNDTGVDG-----ICVVVTSSRDHCA--  
VQSEEGVR-----EGYTSYEAETPFLSCGA-----YVQEYA---VRENFCYYERTLRIPLAH--  
DYDPCSTAMVLGYAHVWLETRLVS-PPYVQ-EFGYDPS-RNEYANRSLFE--  
QLQDLQRQYEELLKSSNPAVRMANQ-----  
LAATLTEEARAI FRINADSQLMQTAFEADEERLRELEARIENTMQDIFL-  
NTMSYQELDALRRSAFSTR--C-----CVLDGT-----SVRKYFPL-EHY--LCGNYG-  
DYIV-----TAGEYRFL LINHTLVDEAYNATE-----QPWLTCYEITLVPVSTEEQ-----  
RARVEEALFLDA-----  
-----









>u1\_Rabfi9633944

MLYITL FILVMIGSVY-----SEEACRYKLGLYGVYPDDSNY-RTPLDVK-----  
TTTQNYENVIIANAMLLESKI-----NWTIIMSEV-----  
NETFAQNCSNSD-----  
YLYNGRINETFILTFQSGYVDAYHELLFVEPTS-----FEMPTN-----  
MSIKYANCTNYTTPPATPTPGYGNDSDTTQLRL-----S-----FNESSMIITFN-----  
NITVVL-----NNTCITTSIE-RVHI-----RLDNDSLIVIATSYP-  
FSTSPPFIEKEYFNCTLTLPVFIQQ-----  
GSKFEKESNCTVDYDATTNDTLI-----NSTACVNTTFD-----  
STKNITYVYNNETRVLIEQQN-DLFTNITVITEFLNECNASSPETK-----LYAVG--  
IPNVYNEILTNLSVEI--TNDTVTYFNCK-L-IGTGDC-----GVGIFLERATTMILEEKAKAK-----  
AKSNSRHARSV-----IDLDDAFCLHMRH-----GLHHDVD-  
CRSRLIPEEKPKPK-----ERSRRSPPKGEKPPVPPK-----NDLVLMSADEL----  
GA-RP-KIRRNDDTIQMGASGV-----DGPVAG-SDQIYTDVKQR-LETRIKKLAIDDKSCVLTA-  
SRLPPSTKALLEEVIGRKAISTKASKDITLQ-----ILNQQQGI--TGNPMDRLF-----  
KVDVQTHTRPSTIINVDTSSRVYANILR-----  
TPKNVEVSVSKGVTVVETT VYGSRDDTYLKPRRSSMSDSDS-----  
TYFLQPEDEEV-----FGTSTQHMNKRRPLRRHSSSDYETIKERQRSV-----  
EENYYESVNDHNLALAGRPTTPRRPNPREGVPLPPIPRKDLPLPPIPG-----  
NENPFNTKTKKMID-----KICDSQG-----  
SASICDIR-----  
SSDLLYESVVYDETNRQLKHNPIYEPFNELEYSANPLY-----  
-----QPLEESKPKSGLTRKNAIRRRPGQGSDTVIIIE--  
TRYSEGPEQGNNDYDANDVKHSDWRVSNYSAEPRKGNNDGGGTNTAKDG-----  
QGKKVSKTHKHKHKLKLS-MG-VYENDKINSMIKAI---ALSSYVSTTSSRISSIMATAGSQ--  
PKELVIVNLLSSVLSQIGGTISITG-----SNSPTVAVAGLALQGISGLIDAATSIYHILTGSQ--  
PYKDPAIEKFSNYANYMSRTE-AGARVCMMPDS--DITITLAYRHT--KMNTDA-E---  
KARGEYTDIIPSKVYYLKNNYISYAKVTLVCP-IGQLRLLLEADVNAVATLIREET-  
NGGKYYLVHGILELLSYHPTVTFTCGNEPGVIFTPFEQKLKDMQLLRISTPGEPKEAEDMPSNVCDLYPL  
KRF-YVLAGNCPYDMSRKSVAIVTCSTLLRMSTYEHTKRWILMNPFSKDEHDNIQLF-TFKKYDF--  
KDSLINLNEIGYSDTVCSQS-DTGTCYWS DAMILEDVT-VCTSRIRKLYVKLS----TSLGKGY-  
NSFVLTCPYGSTPFY-----I-----SNGTIVDIPINTRRTTVRF---AAQ-SDTT-  
ALVSCIHNTNAAKSDIIQLTFVTE-DTQS-NYLDFRYFK--YRRRLFETFS-----  
DPMPLRSKCKRYEENRRCRN---Y-YHV--KHIPK---IDYKVMQRLP-MVKLSTSYT-  
GPLNDKTITKISSYASPI-SLSIDVSSLSNVY-----D-VPHHFW-  
KYAKEGVRTFSAIAVTMFGCSVVAGNVV-----NPGIGTNSDV--YGRNAKYIFLGTKQSPSNNR-  
IAFDVYDSYYQTT-----  
NYPYEKCDVYLDLLTRRLEIRCPELTIPQKPFNSPLVNS-----LCVLVATSRDHCA-  
LVAENWDR-----YGYSYSEAYTEFDSCRN-----EYYPTR---PIDNFCYY---  
WHLSTYWPPDYDPCISAMVLAHSYIFPDNKIVN-PPYIK-EFGYDPD-KNEYVDGTLYA--  
KLQTLYEQYNKLVESMNPVGVISNN-----  
LAAAMTPEAREIFRLEYSGSEMEMEITLNKRKAEKVKGEIEDLLSDIYA-  
NTLTYSEATAMLRSAISTR--C-----CVLNGT-----GVYKYFKL-EHY--LCGAYD-  
DYLI-----RIDNKTYVRINETIIPENEYLTTK-----IPRVTCFHTDLIPITDEET-----  
QRRFEKMIIQTA-----  
-----LED-----ALTSI-----FE--EHD---



NNATDYFVEYVRSLQIS-----  
NNSYIHNIAGGLTVVC-----

-----  
MIIATYTFSKLRTKQKKGNYNVRNKIVDPIQEIQLDGIQYY-----  
-----  
-----  
-----  
-----  
-----  
-----  
-----  
-----  
-----  
-----  
-----

>u1\_Myxvi408684627

-----  
MYRTLFIIMIGYAY-----PEEVCYRKLGLYGVYHDDSKY-RTPLDVK-----  
TMTQNYENVIIANAMLLESKI-----NWTVMIMSEV-----  
NETFVQNCSSPD-----  
YLYNGRINETFILTFQRGYVDADHELLFVEPTSLDEMPNTNVSV-----VY-----  
KNDTGNTITTSAPPTTAPTPTPEVSNDTTQLRLS-----F-----NESSMIITFN-----  
NITVVL-----NNTCITTSVE-RVRV--RLVNS-----LIVSATSYP-  
FSTSPPFMEKEYFDNCTLTLPVSIHQ-----  
GSKFEEQRVEESNCTVEYNVTDYNSTADNNTSVNATTGLNYTCMTNTTF-----  
DPTKNITYVYNNETRVVLEEQN-DLFTNITITIDFLNECNASSMETK----IYAVG--  
IPNVYNEILTNLSEI--TNDTVTYFNCK-L-MGTGDC---GLGIFLERATTMILEEKTKSK-----  
TKSSSRHARSV-----VDLEDAFCLHMRH-----GLHHDVD-  
CRSRLIPEEEPTQPTR-----TRNRRSPPKGEKPPVPPK-----SDLVLSAEEL---  
GA-RP-KIRKNTDTIQLGASGT-----DGPVSG-SDQIYADLKQK-IETRLKKLIDE--GGLTA-  
SRLPPSTKALLEEAIGR-----KARSVQ-----VSKDITRQ--  
IIDQQGATGDPISGRQFKVNVRTQTRPSTTVTVDTSAGVYANVLR-----  
TPKDVEVTAPKDVTVVKTTVYGGRRDDTYFLEPRRSSASSESPYFLEPRRSSASDVG-----  
SASPYFLQPGDEDVFGQEYAQVN----KRRLPSDGVHNPLRRHSSSDYETIKERQRSIKYH-----  
RENYYESVDDSNLYALAGRPTPRRPNREGVPLPPIPRKDL----PLPP-----  
IPGNDFNTKTKKID-----KICDSQG-----  
AASICGIR-----  
GTDALYESVDDVDTRHLKRNPIYEPFNEREYSTNPLYQ-----  
-----PLEEGAKPKSALTRKNAIRRRPGQDSDTLVIE--  
TRYSEGPEPGNDNYAANNVKN-----  
NADGRSTNIYSAEPKNGTGGGGTGDVANTKDGQAKKVKTPKGNKHKLSMGG-  
AYENNMNSMIKAI--ALSSYLSTNSRISSIMASAGSQ--  
PKELAIVNIIVSSVLSQIGGTIAIAG-----SNSPTAAAAGLALQGISGLIDAATSIYYILAGLQ--  
PYKDPAIEKFSNYANYMSRTE-AGARVCMMPDS--DITITLAYRHS--KMNTDA-E---  
KNRGEYTDVIPSKVYLLKNNYISYTVKVTLVCP-IGQLRLLLEADVNTYSTLIREEN-  
NGAKYYLVHGILELLSYHSTVFTFCNEPGVIFTPFEQKLRDMQLLRISTPGEPKEAEDMPSNVCDLYPL  
KRF-YVLAGNCPYDMSRKSVAIVTCTLLRMSTYEATKRWILMNPFESEHDNIQLF-TFKKYDF--  
KGSVINLNEIGHSDTVCSQS-DTSTCYWSDAMILEDVT-ACTSRIRKLYVKLS-----TSLGKGY-  
NSFVLTCPYGSTPFY-----I-----SNGTIVDIPINTRRTTVRF---TAQ-SDTT-  
ALVSCIHNTNPAYKSDIIQLSFVTE-DARS-NYLDFRYFK--YRQKLFNVFS--DP--





-----IIYNNETIDLS-----  
QYYNNTERNIYNETIDLSKYNDTEETIIYVQRNRSKLNLCDSASMETK----VQSIG--  
IIDVYNQTLVNMSSIIP--NNETAAYYLCV-L-SGTNNC----GIDIFVEAASKYILEEENQ-----  
KQSKNRRKRSI-----NMELDEFCLHRNY-----  
DLTSLEDCTNTNINNKAIIVVKNI-----RKRRSPPGNNNKPPVPSK-----  
GNLVLQSADEL---GA-RP-KIRSRVKNIQVGAHGT-----DGSVSG-SEEIYSNVKSE-  
ISEKIKRMVITSKGDLTPE--ERLPSSTRALIGSVIQSKIDTV---SESEHI-----TKQLIEKQ--  
KPDATYAVP-----  
MKKGIIIVEAGNRPSSLLDVTSSKIYTNTLR-----  
NRGDTLIKTKNRHVRIYEEEDTYFLRGRLSSSGSEEDTYFMRRTPSSSSDDTY----  
FLKESDNRVSPSTTYSPLNPKIRNPSSSSSTY--  
NLAGLPQQNRNPSSLTIDLGLPSRKNKNHPPENYYESIDDEHVYESINDP-  
VYSLAGNPKKHVDRSTL-----PVPP-----  
LPNENKKKKMID-----MICESKS-----  
RSSICNVR-----  
NFEESLYESIDDDQFSKRNSLYDTTGFKRNSLYDTAGGDHFSKRN-----  
-----SIYESIDDDVIYNDLSGHQSLVRKNAMKKTKKQ--  
LNTQNEEFVITVKEDGNNDMD-----NMDINNNNNNNNHGNNN-----  
NNKRKEKTKNKLNELS-VY----DNKMDKIVKTI---ALSTYLSSTNTRISSIMAQAHTQ--  
PKELTIVNIISSVLTQLGGTLAGG-----AGSPKAAVAGLALQGIAGLIDAATSIYFLLSGEE--  
PPKDPAIEKFSNYASYVSQTD-AGARVCMMPDS--DITITLAYRHN--NMNNEA-E---  
KVRGEYTDITPSKVYYLRNNQISYTVKITLVCP-IGQLRLEADVNNYATLLREDK-  
NGVKYYLVHGILELLSYHPNVTFTCGNEPGVIFMPFDQSLSDMQLLRISTPGEPYSAREMPSNVCDLYPL  
KKF-YVLAGNCPYDMSRISVTVTCNTLLRMSTYDYEKNRWILMNPFSRTNEDIYQLF-  
TFSKYDFSSKSDTINLNTIGHSGTICSQF-DTNTCYWADSMILEDVT-SCNSRIRKLHVELA-----  
VVSDKGY-NSFVLNCPYGSTPFH-----I-----SNGSIEIPMNRTRTSVRF---LSQ-  
SENV-ALISCIHNSNPIYKSDIITFKKS-DMSS-KYLDKFNFN--DRKYLFDSEFS-----  
DIMPKRSKTCKRYSENKCKN---Y-YQI--KHHPE---IDYKVVVVKTP-MVRLTTSYS-  
GPLNEYTLANIRNYSSPI-QINLDVSSLSNVY-----K-NPDHFW-  
TFALKNKRTFSSIVVTLFPCSVVAGNIDV----NYGIHSGKNYDR--YGRNGKYMFIGSKDSPSNKR-  
INFNFVKDHINSKL-----  
ENEFKGDVHLDLESRLVKVSCPEFTIPQRPFDSDNSINS-----LCVLVTTSRDHCA-  
ISEEAWSKNDRTHGYGYSYEESNMEFNVCVN-----GKGTRKPLDNFCYY---  
WYLGTYWAPDYDPCASSMVLGYSPVFLNKLVK-PPYIK-EFGYNPG-NEYVNRDLYN--  
RLQHLYDNYNKLVMYSLDPVVEMSNE-----  
FAKSMTKEGREIFRLIADSKEIQTVRKENELKAEKIRDEIEKTLNDIYV-  
NLTLYSETTELLRSSINTR--C-----CVLNGT----DVYKYFTL-EYY--LCGTYD-  
DYRI-----NVDNKTYIKINNTLIEEDIYLALK-----IPQVTCFQISLISVNNEES-----  
QKNFETEIVRLA-----  
-----FED-----VLNDL-----FK--EID---  
NNKTLYFI-----SFENERR-----  
NVNKINEIDKNLILSIS-----  
ISLAITVVSTIAIIL-----  
IIKRSKYKMGSYNINTTQKPLNNSSLKNTYVSLIDFDEIYYKINN-----  
-----  
-----  
-----  
-----  
-----  
-----

>u1\_Shevi21492585

MGKVLNLSLFTMLIILIYNTYC-----EKLVCYRKLGLYNFYNKDMRS---HSSFELN--  
TKRQDFDVLKANKAMALEQKI-----NWTMLKEEV-----  
NDLFKKNCTSDSN-----  
TIYNGILSEITFEINHGFFNVDTEVSISKSLLYMDLGVENYSD-----VLESYNI-----  
TISNMTTMTPTPATVITTPLYLENKNNTNDIKV-----K-----LYMVNSSIILTFE-----  
NITIVI-----NNTCIGTSIN-----SIYAKITSD-----FITINVTTDP-  
LSTTPPFLTksMFDNCTLTLPVTISQEGYYTKEYNEHTGTTESFTYSYSDNMNMTESFTTAFSYSDDTT  
TEPLTTSDYLYNTTLEPSFTTSRYLLNNGTSNYKNISYVYNNKTCIVFVKQNNIFKNITIQTEFKNLGN  
ESSLETK----VYAVG--VPEKFNTILKNISVEK--SNDSYFICKMI-EDGGNC----  
EIDIFMDAATNNINDELSSK-----KGSNTRHARSV-----  
DHIELDPFCLHMYH-----GIDETIDCSLKKNNKDMSKHTNRI-----  
RRSPDPKGGKQPVTK-----GNLQMSAEEM---GA-RP-  
KIRKQTQDVQIGARGV-----DGPVSG-SEEIYSQVRKE-LSQKLKSLVLDLDD-GKLTT-  
TRLPKSTKALIGGLVDSKIET----SSAAYD-----ITRQIVHQ--QSGDIYSLP----  
VKNKVFVGVESNRKITSPIIDVDTSSNIYANVLQ-----  
KRDFKITS PKNV DVYEKTRTDSFSDSYFLKRSFSSSDDTYFLKESDDSDSDIFR-----  
-----RSSKKDQTYSLAGKPLKKQSLRRYSSSDYETI-----  
GENIYESIREP-EYALLSKPRVLNPRSHI-----PIPS-----  
LPKDEIPFTQQKRKVID-----MICDSRF-----ASSICNAR---GLDLA-----  
NYRGDSNIYKTTDDDFVKRENSLYARSKLEPELKDNPYESLSNIDIVSNPYN-----  
-----NPKLSRRNAIKKKVLNDGYDEFVIRTDEEPSE--  
KPNMATNTYNNNDKANNKDN-----KGFSYLNNDIQEDEKNVNI-----  
KKSKKGRTRKLSKLS-TD----NKINMIKTI---AISSYLSSTNSRISSIMAQSNQ--  
PKELTIVNIVTSVLSQIGGTLAMAG-----SGSPKAAAAGLVIQGISGLIDAATSIFLLSGQE--  
QPKDPAIEKFSNYASYVSKTD-AGARVCMMPDS--DITITLAYRHS--NMNVEA-E----  
KTRGEYTDIIPSTVYYLKNSQISYTVKVTLVCP-IGQLRLLLEADINTYATLTREDK-  
DGVKFYHVFGEILELLSYHPNVTFTCGNEPGVIFIPFEQKLSDMQLLRISTPGEPREAEAMSSDVCDIYPL  
KKF-YVLAGNCPFDMRSKSVAYVTCSTLLRMSTYEHEKQRWILMNPFSNNNEDNIQLF-  
TFKKYDFSAEKDKIKLNSISHSDTICSQS-DTSTCFWADAMILEDVT-SCNSRIRKLSVEMS----  
TVSEKGY--NNFVLTCPYGSTPFY-----I-----SNGSIISIPMNTRRTSVRF---ASK-  
HNNV-ALISCIHNSNPAYKSDIVEVMFKQS-NMSD-MYLDKFYFK--DRKYLFDSEFS----  
DIMPKRKTCKRASENSNCKN---Y-YYI--KHVPE---IEFKVHVAKLP-MVRLGTSYS-  
GVLNYQTLEKVNKYFSTPI-SISVDASTLSNVY-----K-NQEHFW-  
KFAMEKKRTFSSITATIFACSVVAGKVVV-----NMGVKGSHDY--YGRSGKYIYMGSKDFASNDK-  
IYFNFI----PDKA-----  
EYRLKDTYGECEIYLDLKTTRRVNVCPELTIPQHPFDSLVDNS-----LCVLVATSRDHCA-  
ISEENWRSYDRTHGVGYSHEYVDAEFDSCSK-----NHGPTY---PVDNFCFY---  
WSAGIYWPPDYDPCASSMVLGYSPIFTENRIVN-PPYIK-EFGYEPE-KNEYVKRELYN--  
KLONLYEKYNMLVLYSMNPVVEMSNG-----  
LAKSMTSEAREIFRLIANSNEMQKAKEENDMKAEKVKMEIEETLNNIYV-  
DTLSYSESTSLRSAISTR--C-----CVLDGT-----SVYKYFDL-EYY--LCGNYS-  
DYLI-----NINNVTYVKINDSLIEEDIYLVN-----IPQVTCFDITLVPINNEEQ----  
QKKFETEIVTMA-----





Supplemental Figure Legends

FIG S1 Multiple protein alignment used to prepare the Figure 3 tree.

FIG S2 Multiple protein alignment used to prepare the Figure 8 tree.
